# Supplementary material for: DNA methylation in adolescents with anxiety disorder: a longitudinal study
Source: PubMed Central journal article supplement (PMC6138655; doi:10.1038/s41598-018-32090-1), 2018-09-14
Supplement: 41598_2018_32090_MOESM1_ESM.pdf [file 41598_2018_32090_MOESM1_ESM.pdf]

## DNA methylation in adolescents with anxiety disorder: a longitudinal study

Authors: Andressa Bortoluzzi; Giovanni Abrahão Salum; Eduarda Dias da Rosa;

Vinícius de Saraiva Chagas; Mauro Antônio Alves Castro and Gisele Gus Manfro

### Supplementary Information

|                                                                                                    |     |
|----------------------------------------------------------------------------------------------------|-----|
| <b>Appendix 1:</b> .....                                                                           | 1   |
| <b>Table S1</b> - Gene collection of Control group.....                                            | 1   |
| <b>Table S2</b> - Gene collection of Incident group.....                                           | 42  |
| <b>Table S3</b> - Gene collection of Persistent (cases) group.....                                 | 62  |
| <b>Table S4</b> – Gene collection of Remittent group .....                                         | 112 |
| <b>Table S5.</b> Descriptive data in the groups defined by trajectories of anxiety disorders ..... | 145 |
| <b>Table S6.</b> Descriptive data about adolescents evaluated in 2008 (n= 234) .....               | 146 |

#### Appendix 1:

#### Table S1 - Gene collection of Control group

| <b>Table S1 - Gene collection of Control group</b> |                                                                           |
|----------------------------------------------------|---------------------------------------------------------------------------|
| <b>Biological processes</b>                        |                                                                           |
| <b>Tissue development</b>                          |                                                                           |
| <b>Gene Symbol</b>                                 | <b>Name Gene</b>                                                          |
| ACVR1                                              | activin A receptor type 1                                                 |
| ALOX12B                                            | arachidonate 12-lipoxygenase, 12R type                                    |
| ATP2A2                                             | ATPase sarcoplasmic/endoplasmic reticulum Ca <sup>2+</sup> transporting 2 |
| BTD                                                | biotinidase                                                               |
| CASR                                               | calcium sensing receptor                                                  |
| RUNX2                                              | runt related transcription factor 2                                       |
| CDK6                                               | cyclin-dependent kinase 6                                                 |
| COL1A1                                             | collagen type I alpha 1                                                   |
| COL5A2                                             | collagen type V alpha 2                                                   |
| COL7A1                                             | collagen type VII alpha 1                                                 |
| COL11A1                                            | collagen type XI alpha 1                                                  |
| COL13A1                                            | collagen type XIII alpha 1                                                |
| CTGF                                               | connective tissue growth fator                                            |
| DHCR24                                             | 24-dehydrocholesterol reductase                                           |
| DSP                                                | Desmoplakin                                                               |
| EMP1                                               | epithelial membrane protein 1                                             |
| STX2                                               | syntaxin 2                                                                |
| ERCC3                                              | excision repair cross-complementation group 3                             |
| EVPL                                               | Envoplakin                                                                |
| GJB5                                               | gap junction protein beta 5                                               |

|                                          |                                                                 |
|------------------------------------------|-----------------------------------------------------------------|
| GLI2                                     | GLI family zinc finger 2                                        |
| JAK2                                     | Janus kinase 2                                                  |
| KRT1                                     | keratin 1                                                       |
| KRT5                                     | keratin 5                                                       |
| KRT6B                                    | keratin 6B                                                      |
| KRT13                                    | keratin 13                                                      |
| KRT15                                    | keratin 15                                                      |
| KRT32                                    | keratin 32                                                      |
| LAMA3                                    | laminin subunit alpha 3                                         |
| LAMB3                                    | laminin subunit beta 3                                          |
| LAMC1                                    | laminin subunit gamma 1                                         |
| LAMC2                                    | laminin subunit gamma 2                                         |
| MATK                                     | megakaryocyte-associated tyrosine kinase                        |
| MEST                                     | mesoderm specific transcript                                    |
| NF1                                      | neurofibromin 1                                                 |
| SRGN                                     | Serglycin                                                       |
| PROX1                                    | prospero homeobox 1                                             |
| SECTM1                                   | secreted and transmembrane 1                                    |
| SNAI2                                    | snail family transcriptional repressor 2                        |
| SPRR1A                                   | small proline rich protein 1A                                   |
| TBX3                                     | T-box 3                                                         |
| TFAP2A                                   | transcription factor AP-2 alpha                                 |
| TGFB2                                    | transforming growth factor beta 2                               |
| TGM3                                     | transglutaminase 3                                              |
| TIE1                                     | tyrosine kinase with immunoglobulin like and EGF like domains 1 |
| UGCG                                     | UDP-glucose ceramide glucosyltransferase                        |
| SCEL                                     | sciellin                                                        |
| KLF4                                     | Kruppel-like factor 4 (gut)                                     |
| TGM5                                     | transglutaminase 5                                              |
| KL                                       | Klotho                                                          |
| IKZF1                                    | IKAROS family zinc finger 1                                     |
| FST                                      | Follistatin                                                     |
| IKZF3                                    | IKAROS family zinc finger 3                                     |
| VAX2                                     | ventral anterior homeobox 2                                     |
| KLK5                                     | kallikrein related peptidase 5                                  |
| ZBTB7B                                   | zinc finger and BTB domain containing 7B                        |
| CALML5                                   | calmodulin like 5                                               |
| ANKH                                     | ANKH inorganic pyrophosphate transport regulator                |
| SMURF1                                   | SMAD specific E3 ubiquitin protein ligase 1                     |
| TWIST2                                   | twist family bHLH transcription factor 2                        |
| RTN4RL1                                  | reticulon 4 receptor like 1                                     |
| RTN4RL2                                  | reticulon 4 receptor-like 2                                     |
| <b>Regulation of signal transduction</b> |                                                                 |
| <b>Gene Symbol</b>                       | <b>Name Gene</b>                                                |
| ACVR1                                    | activin A receptor type 1                                       |
| AMBP                                     | alpha-1-microglobulin/bikunin precursor                         |
| FASLG                                    | Fas ligand                                                      |
| RHOH                                     | ras homolog family member H                                     |
| BST2                                     | bone marrow stromal cell antigen 2                              |
| CASP8                                    | caspase 8                                                       |
| CDH13                                    | cadherin 13                                                     |
| DMPK                                     | dystrophia myotonica protein kinase                             |
| DTX1                                     | deltex 1                                                        |
| ECM1                                     | extracellular matrix protein 1                                  |

|          |                                                                                         |
|----------|-----------------------------------------------------------------------------------------|
| ENG      | Endoglin                                                                                |
| F2R      | coagulation factor II thrombin receptor                                                 |
| GJA1     | gap junction protein alpha 1                                                            |
| GNG7     | G protein subunit gamma 7                                                               |
| GRK4     | G protein-coupled receptor kinase 4                                                     |
| GRK5     | G protein-coupled receptor kinase 5                                                     |
| GRK6     | G protein-coupled receptor kinase 6                                                     |
| GRM4     | glutamate metabotropic receptor 4                                                       |
| HCLS1    | hematopoietic cell-specific Lyn substrate 1                                             |
| IGF1     | insulin like growth factor 1                                                            |
| IL12A    | interleukin 12A                                                                         |
| LGALS1   | galectin 1                                                                              |
| LGALS9   | galectin 9                                                                              |
| LTBR     | lymphotoxin beta receptor                                                               |
| LYN      | LYN proto-oncogene, Src family tyrosine kinase                                          |
| SMAD3    | SMAD family member 3                                                                    |
| MDFI     | MyoD family inhibitor                                                                   |
| MAP3K3   | mitogen-activated protein kinase kinase kinase 3                                        |
| NF1      | neurofibromin 1                                                                         |
| NF2      | neurofibromin 2 (merlin)                                                                |
| PPM1A    | protein phosphatase, Mg <sup>2+</sup> /Mn <sup>2+</sup> dependent 1A                    |
| PTEN     | phosphatase and tensin homolog                                                          |
| PTPRC    | protein tyrosine phosphatase, receptor type C                                           |
| RAC1     | ras-related C3 botulinum toxin substrate 1 (rho family, small GTP binding protein Rac1) |
| RELA     | RELA proto-oncogene, NF-kB subunit                                                      |
| REN      | renin                                                                                   |
| RGS2     | regulator of G-protein signaling 2                                                      |
| RGS3     | regulator of G-protein signaling 3                                                      |
| RGS12    | regulator of G-protein signaling 12                                                     |
| SECTM1   | secreted and transmembrane 1                                                            |
| TPD52L1  | tumor protein D52-like 1                                                                |
| TRAF5    | TNF receptor associated factor 5                                                        |
| TRAF6    | TNF receptor associated factor 6                                                        |
| UBE2N    | ubiquitin conjugating enzyme E2 N                                                       |
| ZIC1     | Zic family member 1                                                                     |
| BRAP     | BRCA1 associated protein                                                                |
| NCK2     | NCK adaptor protein 2                                                                   |
| RGS20    | regulator of G-protein signaling 20                                                     |
| TP63     | tumor protein p63                                                                       |
| TRADD    | TNFRSF1A associated via death domain                                                    |
| RIPK1    | receptor interacting serine/threonine kinase 1                                          |
| RIPK2    | receptor interacting serine/threonine kinase 2                                          |
| RGS9     | regulator of G-protein signaling 9                                                      |
| CFLAR    | CASP8 and FADD like apoptosis regulator                                                 |
| HGS      | hepatocyte growth factor-regulated tyrosine kinase substrate                            |
| LITAF    | lipopolysaccharide induced TNF factor                                                   |
| CDC42BPB | CDC42 binding protein kinase beta                                                       |
| IKBKE    | inhibitor of kappa light polypeptide gene enhancer in B-cells, kinase epsilon           |
| GIT2     | GIT ArfGAP 2                                                                            |
| RAMP1    | receptor activity modifying protein 1                                                   |
| TLR6     | toll like receptor 6                                                                    |
| NOD1     | nucleotide binding oligomerization domain containing 1                                  |
| TRIM38   | tripartite motif containing 38                                                          |
| RGS14    | regulator of G-protein signaling 14                                                     |
| PLK2     | polo like kinase 2                                                                      |
| NEK6     | NIMA related kinase 6                                                                   |
| RALBP1   | ralA binding protein 1                                                                  |

|                                           |                                                                    |
|-------------------------------------------|--------------------------------------------------------------------|
| CARD8                                     | caspase recruitment domain family member 8                         |
| TAB2                                      | TGF-beta activated kinase 1/MAP3K7 binding protein 2               |
| MAPK8IP3                                  | mitogen-activated protein kinase 8 interacting protein 3           |
| ZDHHC17                                   | zinc finger DHHC-type containing 17                                |
| CBL                                       | Cbl proto-oncogene C                                               |
| CBY1                                      | chibby homolog 1 (Drosophila)                                      |
| ATP2C1                                    | ATPase secretory pathway Ca <sup>2+</sup> transporting 1           |
| GIT1                                      | GIT ArfGAP 1                                                       |
| HIPK2                                     | homeodomain interacting protein kinase 2                           |
| MDFIC                                     | MyoD family inhibitor domain containing                            |
| IL20                                      | interleukin 20                                                     |
| TAOK3                                     | TAO kinase 3                                                       |
| CXXC5                                     | CXXC finger protein 5                                              |
| NLK                                       | nemo like kinase                                                   |
| ZDHHC13                                   | zinc finger DHHC-type containing 13                                |
| NDFIP2                                    | Nedd4 family interacting protein 2                                 |
| CDC42BPG                                  | CDC42 binding protein kinase gamma                                 |
| CDKN2AIP                                  | CDKN2A interacting protein                                         |
| FGD6                                      | FYVE, RhoGEF and PH domain containing 6                            |
| OTUD7B                                    | OTU deubiquitinase 7B                                              |
| SLC44A2                                   | solute carrier family 44 member 2                                  |
| SMURF1                                    | SMAD specific E3 ubiquitin protein ligase 1                        |
| PLEKHG5                                   | pleckstrin homology and RhoGEF domain containing G5                |
| SIGIRR                                    | single immunoglobulin and toll-interleukin 1 receptor (TIR) domain |
| CARD9                                     | caspase recruitment domain family member 9                         |
| ARAP3                                     | ArfGAP with RhoGAP domain, ankyrin repeat and PH domain 3          |
| VOPP1                                     | vesicular, overexpressed in cancer, prosurvival protein 1          |
| SLA2                                      | Src-like-adaptor 2                                                 |
| TRAF7                                     | TNF receptor associated factor 7                                   |
| AFAP1L2                                   | actin filament associated protein 1 like 2                         |
| NLRP12                                    | NLR family, pyrin domain containing 12                             |
| IL22RA2                                   | interleukin 22 receptor subunit alpha 2                            |
| ARAP1                                     | ArfGAP with RhoGAP domain, ankyrin repeat and PH domain 1          |
| FGD4                                      | FYVE, RhoGEF and PH domain containing 4                            |
| IL31RA                                    | interleukin 31 receptor A                                          |
| ABRA                                      | actin binding Rho activating protein                               |
| MIB2                                      | mindbomb E3 ubiquitin protein ligase 2                             |
| NFAM1                                     | NFAT activating protein with ITAM motif 1                          |
| FGD5                                      | FYVE, RhoGEF and PH domain containing 5                            |
| ARHGAP27                                  | Rho GTPase activating protein 27                                   |
| FGD2                                      | FYVE, RhoGEF and PH domain containing 2                            |
| EPGN                                      | epithelial mitogen                                                 |
| VWC2                                      | von Willebrand factor C domain containing 2                        |
| <b>Cellular protein metabolic process</b> |                                                                    |
| <b>Gene Symbol</b>                        | <b>Name Gene</b>                                                   |
| AARS                                      | alanyl-tRNA synthetase                                             |
| ABCF1                                     | ATP binding cassette subfamily F member 1                          |
| ABL1                                      | ABL proto-oncogene 1, non-receptor tyrosine kinase                 |
| ABL2                                      | ABL proto-oncogene 2, non-receptor tyrosine kinase                 |
| ACVR1                                     | activin A receptor type 1                                          |
| ACVRL1                                    | activin A receptor like type 1                                     |
| PARP1                                     | poly(ADP-ribose) polymerase 1                                      |
| PARP4                                     | poly(ADP-ribose) polymerase family member 4                        |
| AGA                                       | aspartylglucosaminidase                                            |
| AKT2                                      | AKT serine/threonine kinase 2                                      |
| ALK                                       | anaplastic lymphoma receptor tyrosine kinase                       |
| APBB1                                     | amyloid beta precursor protein binding family B member 1           |
| APC                                       | adenomatous polyposis coli                                         |

|         |                                                                       |
|---------|-----------------------------------------------------------------------|
| APOA4   | apolipoprotein A4                                                     |
| ART3    | ADP-ribosyltransferase 3                                              |
| AZU1    | azurocidin 1                                                          |
| CCND1   | cyclin D1                                                             |
| BMPR1A  | bone morphogenetic protein receptor type 1A                           |
| BMPR1B  | bone morphogenetic protein receptor type 1B                           |
| BRCA1   | breast cancer 1                                                       |
| BRAF    | B-Raf proto-oncogene, serine/threonine kinase                         |
| C2      | complement component 2                                                |
| CAMK2B  | calcium/calmodulin dependent protein kinase II beta                   |
| CAPN3   | calpain 3                                                             |
| CASP8   | caspase 8                                                             |
| CCND2   | cyclin D2                                                             |
| CD3E    | CD3e molecule                                                         |
| CD28    | CD28 molecule                                                         |
| CD80    | CD80 molecule                                                         |
| TNFRSF8 | tumor necrosis factor receptor superfamily member 8                   |
| CD37    | CD37 molecule                                                         |
| CD81    | CD81 molecule                                                         |
| CDK11B  | cyclin-dependent kinase 11B                                           |
| CETP    | cholesteryl ester transfer protein                                    |
| CHRM1   | cholinergic receptor muscarinic 1                                     |
| CHRM3   | cholinergic receptor muscarinic 3                                     |
| ERCC8   | excision repair cross-complementation group 8                         |
| PLK3    | polo like kinase 3                                                    |
| MAP3K8  | mitogen-activated protein kinase kinase kinase 8                      |
| COX10   | COX10 heme A:farnesyltransferase cytochrome c oxidase assembly factor |
| CPA3    | carboxypeptidase A3                                                   |
| CPB2    | carboxypeptidase B2                                                   |
| CREBBP  | CREB binding protein                                                  |
| CSNK1A1 | casein kinase 1 alpha 1                                               |
| CSNK1D  | casein kinase 1 delta                                                 |
| CSNK1G2 | casein kinase 1 gamma 2                                               |
| CSNK1G3 | casein kinase 1 gamma 3                                               |
| CTBP1   | C-terminal binding protein 1                                          |
| CTSH    | cathepsin H                                                           |
| CTSO    | cathepsin O                                                           |
| CTSZ    | cathepsin Z                                                           |
| DAPK1   | death associated protein kinase 1                                     |
| DAPK3   | death-associated protein kinase 3                                     |
| DARS    | aspartyl-tRNA synthetase                                              |
| ACE     | angiotensin I converting enzyme                                       |
| CFD     | complement factor D                                                   |
| DMPK    | dystrophia myotonica protein kinase                                   |
| DSP     | desmoplakin                                                           |
| DUSP2   | dual specificity phosphatase 2                                        |
| DUSP3   | dual specificity phosphatase 3                                        |
| DUSP4   | dual specificity phosphatase 4                                        |
| DUSP5   | dual specificity phosphatase 5                                        |
| DUSP6   | dual specificity phosphatase 6                                        |
| DYRK1A  | dual specificity tyrosine phosphorylation regulated kinase 1A         |
| EGFR    | epidermal growth factor receptor                                      |
| EIF4A2  | eukaryotic translation initiation factor 4A2                          |
| EIF5    | eukaryotic translation initiation factor 5                            |
| ELANE   | elastase, neutrophil expressed                                        |
| MARK2   | microtubule affinity regulating kinase 2                              |
| EP300   | E1A binding protein p300                                              |
| EPHA8   | EPH receptor A8                                                       |

|        |                                                         |
|--------|---------------------------------------------------------|
| EPHB2  | EPH receptor B2                                         |
| ERBB2  | erb-b2 receptor tyrosine kinase 2                       |
| ERBB3  | erb-b2 receptor tyrosine kinase 3                       |
| ERG    | v-ets avian erythroblastosis virus E26 oncogene homolog |
| ERN1   | endoplasmic reticulum to nucleus signaling 1            |
| EVPL   | envoplakin                                              |
| EXT1   | exostosin glycosyltransferase 1                         |
| F2R    | coagulation factor II thrombin receptor                 |
| FGR    | FGR proto-oncogene, Src family tyrosine kinase          |
| FMOD   | fibromodulin                                            |
| FRK    | fyn related Src family tyrosine kinase                  |
| FUT5   | fucosyltransferase 5                                    |
| FUT6   | fucosyltransferase 6                                    |
| FYB    | FYN binding protein                                     |
| GAD1   | glutamate decarboxylase 1                               |
| GALNT1 | polypeptide N-acetylgalactosaminyltransferase 1         |
| GALNT2 | polypeptide N-acetylgalactosaminyltransferase 2         |
| GGCX   | gamma-glutamyl carboxylase                              |
| MKNK2  | MAP kinase interacting serine/threonine kinase 2        |
| GSN    | gelsolin                                                |
| GYPC   | glycophorin C (Gerbich blood group)                     |
| HCLS1  | hematopoietic cell-specific Lyn substrate 1             |
| HGFAC  | HGF activator                                           |
| NRG1   | neuregulin 1                                            |
| HMGA1  | high mobility group AT-hook 1                           |
| PRMT1  | protein arginine methyltransferase 1                    |
| HSPB1  | heat shock protein family B (small) member 1            |
| NDST1  | N-deacetylase/N-sulfotransferase 1                      |
| IDE    | insulin degrading enzyme                                |
| IGF1R  | insulin like growth factor 1 receptor                   |
| IL6    | interleukin 6                                           |
| IL10   | interleukin 10                                          |
| IL12A  | interleukin 12A                                         |
| IL18   | interleukin 18                                          |
| INHBA  | inhibin beta A                                          |
| INHBB  | inhibin beta B                                          |
| INSR   | insulin receptor                                        |
| IRAK2  | interleukin 1 receptor associated kinase 2              |
| IRF4   | interferon regulatory factor 4                          |
| ITGB2  | integrin subunit beta 2                                 |
| JAK2   | Janus kinase 2                                          |
| JAK3   | Janus kinase 3                                          |
| KRT1   | keratin 1                                               |
| KRT7   | keratin 7                                               |
| STMN1  | stathmin 1                                              |
| LCK    | LCK proto-oncogene, Src family tyrosine kinase          |
| LDLR   | low density lipoprotein receptor                        |
| LIMK1  | LIM domain kinase 1                                     |
| LIPA   | lipase A, lysosomal acid type                           |
| LIPC   | lipase C, hepatic type                                  |
| LMAN1  | lectin, mannose binding 1                               |
| LOX    | lysyl oxidase                                           |
| LOXL1  | lysyl oxidase like 1                                    |
| LOXL2  | lysyl oxidase like 2                                    |
| LRPAP1 | LDL receptor related protein associated protein 1       |
| LTB    | lymphotoxin beta                                        |
| LYN    | LYN proto-oncogene, Src family tyrosine kinase          |
| SMAD3  | SMAD family member 3                                    |

|         |                                                                      |
|---------|----------------------------------------------------------------------|
| MAPT    | microtubule associated protein tau                                   |
| MATK    | megakaryocyte-associated tyrosine kinase                             |
| MBL2    | mannose binding lectin 2                                             |
| MDM2    | MDM2 proto-oncogene                                                  |
| MDM4    | MDM4, p53 regulator                                                  |
| MAP3K3  | mitogen-activated protein kinase kinase kinase 3                     |
| MIPEP   | mitochondrial intermediate peptidase                                 |
| MAP3K11 | mitogen-activated protein kinase kinase kinase 11                    |
| MMP2    | matrix metalloproteinase 2                                           |
| MMP3    | matrix metalloproteinase 3                                           |
| MMP10   | matrix metalloproteinase 10                                          |
| MMP11   | matrix metalloproteinase 11                                          |
| MMP15   | matrix metalloproteinase 15                                          |
| MSRA    | methionine sulfoxide reductase A                                     |
| MTIF2   | mitochondrial translational initiation factor 2                      |
| MYH9    | myosin, heavy chain 9, non-muscle                                    |
| MYLK    | myosin light chain kinase                                            |
| NUBP1   | nucleotide binding protein 1                                         |
| NF2     | neurofibromin 2 (merlin)                                             |
| OLR1    | oxidized low density lipoprotein receptor 1                          |
| P4HB    | prolyl 4-hydroxylase subunit beta                                    |
| FURIN   | furin, paired basic amino acid cleaving enzyme                       |
| PCSK6   | proprotein convertase subtilisin/kexin type 6                        |
| PAK1    | p21 (RAC1) activated kinase 1                                        |
| PAK2    | p21 (RAC1) activated kinase 2                                        |
| PAM     | peptidylglycine alpha-amidating monooxygenase                        |
| PARK2   | parkin RBR E3 ubiquitin protein ligase                               |
| PCSK1   | proprotein convertase subtilisin/kexin type 1                        |
| PCSK5   | proprotein convertase subtilisin/kexin type 5                        |
| CDK17   | cyclin-dependent kinase 17                                           |
| PDPK1   | 3-phosphoinositide dependent protein kinase 1                        |
| PEPD    | peptidase D                                                          |
| PIGH    | phosphatidylinositol glycan anchor biosynthesis class H              |
| PIM1    | Pim-1 proto-oncogene, serine/threonine kinase                        |
| PLAT    | plasminogen activator, tissue type                                   |
| PLOD2   | procollagen-lysine,2-oxoglutarate 5-dioxygenase 2                    |
| PPM1B   | protein phosphatase, Mg <sup>2+</sup> /Mn <sup>2+</sup> dependent 1B |
| PPM1G   | protein phosphatase, Mg <sup>2+</sup> /Mn <sup>2+</sup> dependent 1G |
| PPP1CA  | protein phosphatase 1 catalytic subunit alpha                        |
| PPP2R2A | protein phosphatase 2 regulatory subunit B'alpha                     |
| PPP2R3A | protein phosphatase 2 regulatory subunit B''alpha                    |
| PPP2R5C | protein phosphatase 2 regulatory subunit B'gamma                     |
| PPT1    | palmitoyl-protein thioesterase 1                                     |
| PREP    | prolyl endopeptidase                                                 |
| SRGN    | serglycin                                                            |
| PRKAA1  | protein kinase AMP-activated catalytic subunit alpha 1               |
| PRKCB   | protein kinase C beta                                                |
| PRKCD   | protein kinase C delta                                               |
| PRKCE   | protein kinase C epsilon                                             |
| PRKCH   | protein kinase C eta                                                 |
| PKN1    | protein kinase N1                                                    |
| PKN2    | protein kinase N2                                                    |
| PRKCZ   | protein kinase C zeta                                                |
| PRKDC   | protein kinase, DNA-activated, catalytic polypeptide                 |
| PRKG1   | protein kinase, cGMP-dependent, type I                               |
| PRKG2   | protein kinase, cGMP-dependent, type II                              |
| MAPK8   | mitogen-activated protein kinase 8                                   |
| MAP2K6  | mitogen-activated protein kinase kinase 6                            |

|         |                                                                                         |
|---------|-----------------------------------------------------------------------------------------|
| PRLR    | prolactin receptor                                                                      |
| PTEN    | phosphatase and tensin homolog                                                          |
| PTK6    | protein tyrosine kinase 6                                                               |
| QSOX1   | quiescin sulfhydryl oxidase 1                                                           |
| PTPN3   | protein tyrosine phosphatase, non-receptor type 3                                       |
| PTPN4   | protein tyrosine phosphatase, non-receptor type 4                                       |
| PTPN6   | protein tyrosine phosphatase, non-receptor type 6                                       |
| PTPN7   | protein tyrosine phosphatase, non-receptor type 7                                       |
| PTPN12  | protein tyrosine phosphatase, non-receptor type 12                                      |
| PTPN14  | protein tyrosine phosphatase, non-receptor type 14                                      |
| PTPRB   | protein tyrosine phosphatase, receptor type B                                           |
| PTPRC   | protein tyrosine phosphatase, receptor type C                                           |
| PTPRD   | protein tyrosine phosphatase, receptor type D                                           |
| PTPRE   | protein tyrosine phosphatase, receptor type E                                           |
| PTPRH   | protein tyrosine phosphatase, receptor type H                                           |
| PTPRJ   | protein tyrosine phosphatase, receptor type J                                           |
| PTPRN2  | protein tyrosine phosphatase, receptor type N2                                          |
| PTPRO   | protein tyrosine phosphatase, receptor type O                                           |
| PTPRR   | protein tyrosine phosphatase, receptor type R                                           |
| PXN     | paxillin                                                                                |
| RAC1    | ras-related C3 botulinum toxin substrate 1 (rho family, small GTP binding protein Rac1) |
| REN     | renin                                                                                   |
| RPL3    | ribosomal protein L3                                                                    |
| RPL3L   | ribosomal protein L3 like                                                               |
| RPL7    | ribosomal protein L7                                                                    |
| RPL7A   | ribosomal protein L7a                                                                   |
| RPL18A  | ribosomal protein L18a                                                                  |
| RPL23A  | ribosomal protein L23a                                                                  |
| MRPL23  | mitochondrial ribosomal protein L23                                                     |
| RPL24   | ribosomal protein L24                                                                   |
| RPL26   | ribosomal protein L26                                                                   |
| RPN1    | ribophorin I                                                                            |
| RPS2    | ribosomal protein S2                                                                    |
| RPS6KB2 | ribosomal protein S6 kinase B2                                                          |
| RPS11   | ribosomal protein S11                                                                   |
| RRBP1   | ribosome binding protein 1                                                              |
| CCL2    | C-C motif chemokine ligand 2                                                            |
| CCL11   | C-C motif chemokine ligand 11                                                           |
| SFTPD   | surfactant protein D                                                                    |
| SGK1    | serum/glucocorticoid regulated kinase 1                                                 |
| SCG5    | secretogranin V                                                                         |
| SGSH    | N-sulfoglucosamine sulfohydrolase                                                       |
| SHH     | sonic hedgehog                                                                          |
| SIAH2   | siah E3 ubiquitin protein ligase 2                                                      |
| SPG7    | SPG7, paraplegin matrix AAA peptidase subunit                                           |
| SPRR1A  | small proline rich protein 1A                                                           |
| SRC     | SRC proto-oncogene, non-receptor tyrosine kinase                                        |
| SRP72   | signal recognition particle 72kDa                                                       |
| SRPK1   | SRSF protein kinase 1                                                                   |
| SRPK2   | SRSF protein kinase 2                                                                   |
| ST14    | suppression of tumorigenicity 14                                                        |
| NEK4    | NIMA related kinase 4                                                                   |
| STK10   | serine/threonine kinase 10                                                              |
| TBCA    | tubulin folding cofactor A                                                              |
| TBCD    | tubulin folding cofactor D                                                              |
| TBCE    | tubulin folding cofactor E                                                              |
| TGFBR1  | transforming growth factor beta receptor 1                                              |



|          |                                                                          |
|----------|--------------------------------------------------------------------------|
| TGM3     | transglutaminase 3                                                       |
| TLR1     | toll like receptor 1                                                     |
| TLR3     | toll like receptor 3                                                     |
| TLR4     | toll like receptor 4                                                     |
| TM4SF4   | transmembrane 4 L six family member 4                                    |
| TNP1     | transition protein 1                                                     |
| TPP2     | tripeptidyl peptidase 2                                                  |
| TRAF6    | TNF receptor associated factor 6                                         |
| TTC1     | tetratricopeptide repeat domain 1                                        |
| TTN      | titin                                                                    |
| UBB      | ubiquitin B                                                              |
| UBE2D1   | ubiquitin conjugating enzyme E2 D1                                       |
| UBE2D3   | ubiquitin conjugating enzyme E2 D3                                       |
| UBE2E1   | ubiquitin conjugating enzyme E2 E1                                       |
| UBE2E2   | ubiquitin conjugating enzyme E2 E2                                       |
| UBE2G1   | ubiquitin conjugating enzyme E2 G1                                       |
| UBE2G2   | ubiquitin conjugating enzyme E2 G2                                       |
| UBE2H    | ubiquitin conjugating enzyme E2 H                                        |
| UBE2I    | ubiquitin conjugating enzyme E2 I                                        |
| UBE2L3   | ubiquitin conjugating enzyme E2 L3                                       |
| UBE2N    | ubiquitin conjugating enzyme E2 N                                        |
| UBE2V2   | ubiquitin conjugating enzyme E2 V2                                       |
| UBE3A    | ubiquitin protein ligase E3A                                             |
| VHL      | von Hippel-Lindau tumor suppressor                                       |
| VRK2     | vaccinia related kinase 2                                                |
| EIF4H    | eukaryotic translation initiation factor 4H                              |
| XPNPEP1  | X-prolyl aminopeptidase (aminopeptidase P) 1, soluble                    |
| USP7     | ubiquitin specific peptidase 7 (herpes virus-associated)                 |
| ST8SIA4  | ST8 alpha-N-acetyl-neuraminide alpha-2,8-sialyltransferase 4             |
| EPM2A    | epilepsy, progressive myoclonus type 2A, Lafora disease (laforin)        |
| KAT6A    | lysine acetyltransferase 6A                                              |
| NR4A3    | nuclear receptor subfamily 4 group A member 3                            |
| CDK2AP1  | cyclin-dependent kinase 2 associated protein 1                           |
| ST8SIA2  | ST8 alpha-N-acetyl-neuraminide alpha-2,8-sialyltransferase 2             |
| MKKS     | McKusick-Kaufman syndrome                                                |
| ULK1     | unc-51 like autophagy activating kinase 1                                |
| LTBP4    | latent transforming growth factor beta binding protein 4                 |
| NCK2     | NCK adaptor protein 2                                                    |
| DYRK3    | dual specificity tyrosine phosphorylation regulated kinase 3             |
| TTF2     | transcription termination factor, RNA polymerase II                      |
| TPST1    | tyrosylprotein sulfotransferase 1                                        |
| FKBP6    | FK506 binding protein 6                                                  |
| CDC42BPA | CDC42 binding protein kinase alpha                                       |
| CPZ      | carboxypeptidase Z                                                       |
| MKNK1    | MAP kinase interacting serine/threonine kinase 1                         |
| SCARF1   | scavenger receptor class F member 1                                      |
| TNKS     | tankyrase                                                                |
| EIF3A    | eukaryotic translation initiation factor 3 subunit A                     |
| EIF3C    | eukaryotic translation initiation factor 3 subunit C                     |
| EIF3F    | eukaryotic translation initiation factor 3 subunit F                     |
| EIF3G    | eukaryotic translation initiation factor 3 subunit G                     |
| EIF3H    | eukaryotic translation initiation factor 3 subunit H                     |
| EIF4G3   | eukaryotic translation initiation factor 4 gamma 3                       |
| B3GALT4  | beta-1,3-galactosyltransferase 4                                         |
| B3GALNT1 | beta-1,3-N-acetylgalactosaminyltransferase 1 (globoside blood group)     |
| MBTPS1   | membrane bound transcription factor peptidase, site 1                    |
| CDKL1    | cyclin dependent kinase like 1                                           |
| DPM2     | dolichyl-phosphate mannosyltransferase polypeptide 2, regulatory subunit |

|          |                                                                               |
|----------|-------------------------------------------------------------------------------|
| EIF2B3   | eukaryotic translation initiation factor 2B subunit gamma                     |
| PRPF4B   | pre-mRNA processing factor 4B                                                 |
| ENDOU    | endonuclease, poly(U) specific                                                |
| BTRC     | beta-transducin repeat containing E3 ubiquitin protein ligase                 |
| PLOD3    | procollagen-lysine,2-oxoglutarate 5-dioxygenase 3                             |
| RPS6KA4  | ribosomal protein S6 kinase A4                                                |
| KALRN    | kalirin, RhoGEF kinase                                                        |
| BRSK2    | BR serine/threonine kinase 2                                                  |
| TM4SF5   | transmembrane 4 L six family member 5                                         |
| UBA3     | ubiquitin like modifier activating enzyme 3                                   |
| MAP3K6   | mitogen-activated protein kinase kinase kinase 6                              |
| MTMR7    | myotubularin related protein 7                                                |
| DYRK1B   | dual specificity tyrosine phosphorylation regulated kinase 1B                 |
| CTDP1    | CTD phosphatase subunit 1                                                     |
| MAP3K13  | mitogen-activated protein kinase kinase kinase 13                             |
| DCLK1    | doublecortin like kinase 1                                                    |
| GCNT3    | glucosaminyl (N-acetyl) transferase 3, mucin type                             |
| RPS6KA5  | ribosomal protein S6 kinase A5                                                |
| STK17B   | serine/threonine kinase 17b                                                   |
| STK17A   | serine/threonine kinase 17a                                                   |
| TGM5     | transglutaminase 5                                                            |
| HS6ST1   | heparan sulfate 6-O-sulfotransferase 1                                        |
| NMT2     | N-myristoyltransferase 2                                                      |
| MAP4K4   | mitogen-activated protein kinase kinase kinase kinase 4                       |
| ROCK2    | Rho associated coiled-coil containing protein kinase 2                        |
| ADAMTS4  | ADAM metalloproteinase with thrombospondin type 1 motif 4                     |
| MPDU1    | mannose-P-dolichol utilization defect 1                                       |
| GMFG     | glia maturation factor gamma                                                  |
| CDC42BPB | CDC42 binding protein kinase beta                                             |
| RNF14    | ring finger protein 14                                                        |
| ISG15    | ISG15 ubiquitin-like modifier                                                 |
| IKBKE    | inhibitor of kappa light polypeptide gene enhancer in B-cells, kinase epsilon |
| KDM4A    | lysine demethylase 4A                                                         |
| UBE3C    | ubiquitin protein ligase E3C                                                  |
| EDEM1    | ER degradation enhancing alpha-mannosidase like protein 1                     |
| ECE2     | endothelin converting enzyme 2                                                |
| TLK1     | tousled like kinase 1                                                         |
| OXS1     | oxidative stress responsive 1                                                 |
| HS3ST3B1 | heparan sulfate-glucosamine 3-sulfotransferase 3B1                            |
| AKT3     | AKT serine/threonine kinase 3                                                 |
| DNAJB6   | DnaJ heat shock protein family (Hsp40) member B6                              |
| PTPRU    | protein tyrosine phosphatase, receptor type U                                 |
| UST      | uronyl 2-sulfotransferase                                                     |
| HIPK3    | homeodomain interacting protein kinase 3                                      |
| CHST4    | carbohydrate sulfotransferase 4                                               |
| TNK2     | tyrosine kinase non receptor 2                                                |
| TRIB1    | tribbles pseudokinase 1                                                       |
| RIDA     | reactive intermediate imine deaminase A homolog                               |
| TLR6     | toll like receptor 6                                                          |
| NOD1     | nucleotide binding oligomerization domain containing 1                        |
| ST3GAL6  | ST3 beta-galactoside alpha-2,3-sialyltransferase 6                            |
| TESK2    | testis-specific kinase 2                                                      |
| PPIH     | peptidylprolyl isomerase H                                                    |
| CARM1    | coactivator associated arginine methyltransferase 1                           |
| PITRM1   | pitrilysin metalloproteinase 1                                                |
| ATG7     | autophagy related 7                                                           |
| IGF2BP2  | insulin like growth factor 2 mRNA binding protein 2                           |
| CAMKK2   | calcium/calmodulin-dependent protein kinase kinase 2                          |

|          |                                                                                        |
|----------|----------------------------------------------------------------------------------------|
| FARS2    | phenylalanyl-tRNA synthetase 2, mitochondrial                                          |
| CORIN    | corin, serine peptidase                                                                |
| MAP3K2   | mitogen-activated protein kinase kinase kinase 2                                       |
| NEK6     | NIMA related kinase 6                                                                  |
| WASF3    | WAS protein family member 3                                                            |
| CLPX     | caseinolytic mitochondrial matrix peptidase chaperone subunit                          |
| HPSE     | heparanase                                                                             |
| PPARGC1A | PPARG coactivator 1 alpha                                                              |
| MAN1A2   | mannosidase alpha class 1A member 2                                                    |
| PDIA5    | protein disulfide isomerase family A member 5                                          |
| METAP2   | methionyl aminopeptidase 2                                                             |
| ADRM1    | adhesion regulating molecule 1                                                         |
| WWP2     | WW domain containing E3 ubiquitin protein ligase 2                                     |
| LECT1    | leukocyte cell derived chemotaxin 1                                                    |
| UBE2C    | ubiquitin conjugating enzyme E2 C                                                      |
| TPPP     | tubulin polymerization promoting protein                                               |
| PTPRT    | protein tyrosine phosphatase, receptor type T                                          |
| MAP4K5   | mitogen-activated protein kinase kinase kinase kinase 5                                |
| MAP4K1   | mitogen-activated protein kinase kinase kinase kinase 1                                |
| IRAK3    | interleukin 1 receptor associated kinase 3                                             |
| DUSP10   | dual specificity phosphatase 10                                                        |
| MGAT4B   | mannosyl (alpha-1,3-)-glycoprotein beta-1,4-N-acetylglucosaminyltransferase, isozyme B |
| MGAT4A   | mannosyl (alpha-1,3-)-glycoprotein beta-1,4-N-acetylglucosaminyltransferase, isozyme A |
| STK38    | serine/threonine kinase 38                                                             |
| LMTK2    | lemur tyrosine kinase 2                                                                |
| TRAK1    | trafficking kinesin protein 1                                                          |
| MAPRE1   | microtubule associated protein RP/EB family member 1                                   |
| ATF6     | activating transcription factor 6                                                      |
| MAST1    | microtubule associated serine/threonine kinase 1                                       |
| STK38L   | serine/threonine kinase 38 like                                                        |
| SAMD4A   | sterile alpha motif domain containing 4A                                               |
| SMG1     | SMG1, nonsense mediated mRNA decay associated PI3K related kinase                      |
| ERC1     | ELKS/RAB6-interacting/CAST family member 1                                             |
| ATG4B    | autophagy related 4B cysteine peptidase                                                |
| CLASP1   | cytoplasmic linker associated protein 1                                                |
| SIK3     | SIK family kinase 3                                                                    |
| ICMT     | isoprenylcysteine carboxyl methyltransferase                                           |
| KAT6B    | lysine acetyltransferase 6B                                                            |
| BACE1    | beta-secretase 1                                                                       |
| CBLC     | Cbl proto-oncogene C                                                                   |
| PRKD3    | protein kinase D3                                                                      |
| AIPL1    | aryl hydrocarbon receptor interacting protein like 1                                   |
| FBXO7    | F-box protein 7                                                                        |
| QPCT     | glutaminy-peptide cyclotransferase                                                     |
| GLCE     | glucuronic acid epimerase                                                              |
| FBXW2    | F-box and WD repeat domain containing 2                                                |
| FBXL6    | F-box and leucine-rich repeat protein 6                                                |
| FBXO22   | F-box protein 22                                                                       |
| FBXO3    | F-box protein 3                                                                        |
| LATS2    | large tumor suppressor kinase 2                                                        |
| EIF2AK1  | eukaryotic translation initiation factor 2 alpha kinase 1                              |
| SERP1    | stress-associated endoplasmic reticulum protein 1                                      |
| TRIB2    | tribbles pseudokinase 2                                                                |
| MYLIP    | myosin regulatory light chain interacting protein                                      |
| NPC1L1   | NPC1 like intracellular cholesterol transporter 1                                      |
| EEF2K    | eukaryotic elongation factor 2 kinase                                                  |

|            |                                                                          |
|------------|--------------------------------------------------------------------------|
| MINK1      | misshapen like kinase 1                                                  |
| CHST11     | carbohydrate (chondroitin 4) sulfotransferase 11                         |
| IL20       | interleukin 20                                                           |
| NDUFA13    | NADH:ubiquinone oxidoreductase subunit A13                               |
| YBX2       | Y-box binding protein 2                                                  |
| SEPSECS    | Sep (O-phosphoserine) tRNA:Sec (selenocysteine) tRNA synthase            |
| A4GNT      | alpha-1,4-N-acetylglucosaminyltransferase                                |
| ING4       | inhibitor of growth family member 4                                      |
| ABI3       | ABI family member 3                                                      |
| CDKL3      | cyclin dependent kinase like 3                                           |
| GCNT4      | glucosaminyl (N-acetyl) transferase 4, core 2                            |
| FZR1       | fizzy/cell division cycle 20 related 1                                   |
| TAOK3      | TAO kinase 3                                                             |
| UBR5       | ubiquitin protein ligase E3 component n-recognin 5                       |
| LIMA1      | LIM domain and actin binding 1                                           |
| PIGT       | phosphatidylinositol glycan anchor biosynthesis class T                  |
| SUFU       | SUFU negative regulator of hedgehog signaling                            |
| ERAP1      | endoplasmic reticulum aminopeptidase 1                                   |
| ZAK        | sterile alpha motif and leucine zipper containing kinase AZK             |
| GALNT7     | polypeptide N-acetylgalactosaminyltransferase 7                          |
| RIPK4      | receptor interacting serine/threonine kinase 4                           |
| TLR9       | toll like receptor 9                                                     |
| SSH1       | slingshot protein phosphatase 1                                          |
| PRMT7      | protein arginine methyltransferase 7                                     |
| SNRK       | SNF related kinase                                                       |
| PIGG       | phosphatidylinositol glycan anchor biosynthesis class G                  |
| CLN6       | ceroid-lipofuscinosis, neuronal 6, late infantile, variant               |
| FBXW7      | F-box and WD repeat domain containing 7                                  |
| CHST12     | carbohydrate (chondroitin 4) sulfotransferase 12                         |
| CDC42BPG   | CDC42 binding protein kinase gamma                                       |
| CDKN2AIP   | CDKN2A interacting protein                                               |
| PIGV       | phosphatidylinositol glycan anchor biosynthesis class V                  |
| CSGALNACT1 | chondroitin sulfate N-acetylgalactosaminyltransferase 1                  |
| CAND1      | cullin associated and neddylation dissociated 1                          |
| CENPJ      | centromere protein J                                                     |
| ALG1       | ALG1, chitobiosyldiphosphodolichol beta-mannosyltransferase              |
| DUSP22     | dual specificity phosphatase 22                                          |
| ADAMTS9    | ADAM metalloproteinase with thrombospondin type 1 motif 9                |
| MAN1C1     | mannosidase alpha class 1C member 1                                      |
| SMURF1     | SMAD specific E3 ubiquitin protein ligase 1                              |
| DOLPP1     | dolichyldiphosphatase 1                                                  |
| PREX1      | phosphatidylinositol-3,4,5-trisphosphate dependent Rac exchange factor 1 |
| MARK4      | microtubule affinity regulating kinase 4                                 |
| SIGIRR     | single immunoglobulin and toll-interleukin 1 receptor (TIR) domain       |
| NECAB3     | N-terminal EF-hand calcium binding protein 3                             |
| DNAJC1     | DnaJ heat shock protein family (Hsp40) member C1                         |
| NSD1       | nuclear receptor binding SET domain protein 1                            |
| CHST8      | carbohydrate sulfotransferase 8                                          |
| SMURF2     | SMAD specific E3 ubiquitin protein ligase 2                              |
| PINK1      | PTEN induced putative kinase 1                                           |
| WNK1       | WNK lysine deficient protein kinase 1                                    |
| BOLL       | boule homolog, RNA binding protein                                       |
| MIS12      | MIS12, kinetochore complex component                                     |
| CARD14     | caspase recruitment domain family member 14                              |
| ISOC2      | isochorismatase domain containing 2                                      |
| EHMT1      | euchromatic histone lysine methyltransferase 1                           |
| NEK11      | NIMA related kinase 11                                                   |
| HDAC11     | histone deacetylase 11                                                   |

|                                  |                                                                   |
|----------------------------------|-------------------------------------------------------------------|
| NAA15                            | N(alpha)-acetyltransferase 15, NatA auxiliary subunit             |
| NAA50                            | N(alpha)-acetyltransferase 50, NatE catalytic subunit             |
| CD276                            | CD276 molecule                                                    |
| MEX3B                            | mex-3 RNA binding family member B                                 |
| TRAF7                            | TNF receptor associated factor 7                                  |
| ING5                             | inhibitor of growth family member 5                               |
| BRSK1                            | BR serine/threonine kinase 1                                      |
| KIAA1804                         | mixed lineage kinase 4                                            |
| C9orf3                           | chromosome 9 open reading frame 3                                 |
| ATG4C                            | autophagy related 4C cysteine peptidase                           |
| ATG4D                            | autophagy related 4D cysteine peptidase                           |
| SSH2                             | slingshot protein phosphatase 2                                   |
| HPS4                             | HPS4, biogenesis of lysosomal organelles complex 3 subunit 2      |
| NLRP12                           | NLR family, pyrin domain containing 12                            |
| TP53RK                           | TP53 regulating kinase                                            |
| IL22RA2                          | interleukin 22 receptor subunit alpha 2                           |
| UHMK1                            | U2AF homology motif (UHM) kinase 1                                |
| IL31RA                           | interleukin 31 receptor A                                         |
| SIK1                             | salt inducible kinase 1                                           |
| PPP4R2                           | protein phosphatase 4 regulatory subunit 2                        |
| TMPRSS6                          | transmembrane protease, serine 6                                  |
| STT3B                            | STT3B, catalytic subunit of the oligosaccharyltransferase complex |
| HS3ST5                           | heparan sulfate-glucosamine 3-sulfotransferase 5                  |
| MAPK15                           | mitogen-activated protein kinase 15                               |
| MSRB3                            | methionine sulfoxide reductase B3                                 |
| METAP1D                          | methionyl aminopeptidase type 1D (mitochondrial)                  |
| RNF144B                          | ring finger protein 144B                                          |
| COX18                            | COX18 cytochrome c oxidase assembly factor                        |
| NDUFS7                           | NADH:ubiquinone oxidoreductase core subunit S7                    |
| AGRN                             | agrin                                                             |
| CCDC88C                          | coiled-coil domain containing 88C                                 |
| EIF2AK4                          | eukaryotic translation initiation factor 2 alpha kinase 4         |
| D2HGDH                           | D-2-hydroxyglutarate dehydrogenase                                |
| <b>Protein metabolic process</b> |                                                                   |
| <b>Gene Symbol</b>               | <b>Name Gene</b>                                                  |
| AARS                             | alanyl-tRNA synthetase                                            |
| ABCF1                            | ATP binding cassette subfamily F member 1                         |
| ABL1                             | ABL proto-oncogene 1, non-receptor tyrosine kinase                |
| ABL2                             | ABL proto-oncogene 2, non-receptor tyrosine kinase                |
| ACVR1                            | activin A receptor type 1                                         |
| ACVRL1                           | activin A receptor like type 1                                    |
| PARP1                            | poly(ADP-ribose) polymerase 1                                     |
| PARP4                            | poly(ADP-ribose) polymerase family member 4                       |
| AGA                              | aspartylglucosaminidase                                           |
| AKT2                             | AKT serine/threonine kinase 2                                     |
| ALK                              | anaplastic lymphoma receptor tyrosine kinase                      |
| APBA1                            | amyloid beta precursor protein binding family A member 1          |
| APBB1                            | amyloid beta precursor protein binding family B member 1          |
| APC                              | adenomatous polyposis coli                                        |
| APOA4                            | apolipoprotein A4                                                 |
| ART3                             | ADP-ribosyltransferase 3                                          |
| AZU1                             | azurocidin 1                                                      |
| CCND1                            | cyclin D1                                                         |
| BMPR1A                           | bone morphogenetic protein receptor type 1A                       |
| BMPR1B                           | bone morphogenetic protein receptor type 1B                       |
| BRCA1                            | breast cancer 1                                                   |
| BRAF                             | B-Raf proto-oncogene, serine/threonine kinase                     |
| C2                               | complement component 2                                            |

|         |                                                                       |
|---------|-----------------------------------------------------------------------|
| CAMK2B  | calcium/calmodulin dependent protein kinase II beta                   |
| CAPN3   | calpain 3                                                             |
| CASP8   | caspase 8                                                             |
| CCND2   | cyclin D2                                                             |
| CD3E    | CD3e molecule                                                         |
| CD9     | CD9 molecule                                                          |
| CD28    | CD28 molecule                                                         |
| CD80    | CD80 molecule                                                         |
| TNFRSF8 | tumor necrosis factor receptor superfamily member 8                   |
| CD37    | CD37 molecule                                                         |
| CD81    | CD81 molecule                                                         |
| CDK11B  | cyclin-dependent kinase 11B                                           |
| CETP    | cholesteryl ester transfer protein                                    |
| CHRM1   | cholinergic receptor muscarinic 1                                     |
| CHRM3   | cholinergic receptor muscarinic 3                                     |
| ERCC8   | excision repair cross-complementation group 8                         |
| PLK3    | polo like kinase 3                                                    |
| MAP3K8  | mitogen-activated protein kinase kinase kinase 8                      |
| COX10   | COX10 heme A:farnesyltransferase cytochrome c oxidase assembly factor |
| CPA3    | carboxypeptidase A3                                                   |
| CPB2    | carboxypeptidase B2                                                   |
| CREBBP  | CREB binding protein                                                  |
| CSNK1A1 | casein kinase 1 alpha 1                                               |
| CSNK1D  | casein kinase 1 delta                                                 |
| CSNK1G2 | casein kinase 1 gamma 2                                               |
| CSNK1G3 | casein kinase 1 gamma 3                                               |
| CTBP1   | C-terminal binding protein 1                                          |
| CTSH    | cathepsin H                                                           |
| CTSO    | cathepsin O                                                           |
| CTSZ    | cathepsin Z                                                           |
| DAPK1   | death associated protein kinase 1                                     |
| DAPK3   | death-associated protein kinase 3                                     |
| DARS    | aspartyl-tRNA synthetase                                              |
| ACE     | angiotensin I converting enzyme                                       |
| CFD     | complement factor D                                                   |
| DLG4    | discs large homolog 4                                                 |
| DMPK    | dystrophia myotonica protein kinase                                   |
| DSP     | desmoplakin                                                           |
| DUSP2   | dual specificity phosphatase 2                                        |
| DUSP3   | dual specificity phosphatase 3                                        |
| DUSP4   | dual specificity phosphatase 4                                        |
| DUSP5   | dual specificity phosphatase 5                                        |
| DUSP6   | dual specificity phosphatase 6                                        |
| DYRK1A  | dual specificity tyrosine phosphorylation regulated kinase 1A         |
| EGFR    | epidermal growth factor receptor                                      |
| EIF4A2  | eukaryotic translation initiation factor 4A2                          |
| EIF5    | eukaryotic translation initiation factor 5                            |
| ELANE   | elastase, neutrophil expressed                                        |
| MARK2   | microtubule affinity regulating kinase 2                              |
| EP300   | E1A binding protein p300                                              |
| EPHA8   | EPH receptor A8                                                       |
| EPHB2   | EPH receptor B2                                                       |
| ERBB2   | erb-b2 receptor tyrosine kinase 2                                     |
| ERBB3   | erb-b2 receptor tyrosine kinase 3                                     |
| ERG     | v-ets avian erythroblastosis virus E26 oncogene homolog               |
| ERN1    | endoplasmic reticulum to nucleus signaling 1                          |
| EVPL    | envoplakin                                                            |
| EXT1    | exostosin glycosyltransferase 1                                       |

|        |                                                   |
|--------|---------------------------------------------------|
| F2R    | coagulation factor II thrombin receptor           |
| FANCC  | Fanconi anemia complementation group C            |
| FGR    | FGR proto-oncogene, Src family tyrosine kinase    |
| FMOD   | fibromodulin                                      |
| FRK    | fyn related Src family tyrosine kinase            |
| MTOR   | mechanistic target of rapamycin                   |
| FUT5   | fucosyltransferase 5                              |
| FUT6   | fucosyltransferase 6                              |
| FYB    | FYN binding protein                               |
| GAD1   | glutamate decarboxylase 1                         |
| GALNT1 | polypeptide N-acetylgalactosaminyltransferase 1   |
| GALNT2 | polypeptide N-acetylgalactosaminyltransferase 2   |
| GGCX   | gamma-glutamyl carboxylase                        |
| GJA1   | gap junction protein alpha 1                      |
| MKNK2  | MAP kinase interacting serine/threonine kinase 2  |
| GSN    | gelsolin                                          |
| GYPC   | glycophorin C (Gerbich blood group)               |
| HCLS1  | hematopoietic cell-specific Lyn substrate 1       |
| HGFAC  | HGF activator                                     |
| NRG1   | neuregulin 1                                      |
| HMGA1  | high mobility group AT-hook 1                     |
| PRMT1  | protein arginine methyltransferase 1              |
| HSPB1  | heat shock protein family B (small) member 1      |
| NDST1  | N-deacetylase/N-sulfotransferase 1                |
| IDE    | insulin degrading enzyme                          |
| IGF1R  | insulin like growth factor 1 receptor             |
| IL2RB  | interleukin 2 receptor subunit beta               |
| IL6    | interleukin 6                                     |
| IL10   | interleukin 10                                    |
| IL12A  | interleukin 12A                                   |
| IL18   | interleukin 18                                    |
| INHBA  | inhibin beta A                                    |
| INHBB  | inhibin beta B                                    |
| INSR   | insulin receptor                                  |
| IRAK2  | interleukin 1 receptor associated kinase 2        |
| IRF4   | interferon regulatory factor 4                    |
| ITGB2  | integrin subunit beta 2                           |
| JAK2   | Janus kinase 2                                    |
| JAK3   | Janus kinase 3                                    |
| KPNA3  | karyopherin subunit alpha 3                       |
| KRT1   | keratin 1                                         |
| KRT7   | keratin 7                                         |
| LAMC1  | laminin subunit gamma 1                           |
| STMN1  | stathmin 1                                        |
| LCK    | LCK proto-oncogene, Src family tyrosine kinase    |
| LDLR   | low density lipoprotein receptor                  |
| LIMK1  | LIM domain kinase 1                               |
| LIPA   | lipase A, lysosomal acid type                     |
| LIPC   | lipase C, hepatic type                            |
| LLGL1  | LLGL1, scribble cell polarity complex component   |
| LMAN1  | lectin, mannose binding 1                         |
| LOX    | lysyl oxidase                                     |
| LOXL1  | lysyl oxidase like 1                              |
| LOXL2  | lysyl oxidase like 2                              |
| LRPAP1 | LDL receptor related protein associated protein 1 |
| LTB    | lymphotoxin beta                                  |
| LYN    | LYN proto-oncogene, Src family tyrosine kinase    |
| SMAD3  | SMAD family member 3                              |

|         |                                                                      |
|---------|----------------------------------------------------------------------|
| MAPT    | microtubule associated protein tau                                   |
| MATK    | megakaryocyte-associated tyrosine kinase                             |
| MATN1   | matrilin 1, cartilage matrix protein                                 |
| MBL2    | mannose binding lectin 2                                             |
| MDM2    | MDM2 proto-oncogene                                                  |
| MDM4    | MDM4, p53 regulator                                                  |
| MAP3K3  | mitogen-activated protein kinase kinase kinase 3                     |
| MIPEP   | mitochondrial intermediate peptidase                                 |
| MAP3K11 | mitogen-activated protein kinase kinase kinase 11                    |
| MMP2    | matrix metallopeptidase 2                                            |
| MMP3    | matrix metallopeptidase 3                                            |
| MMP10   | matrix metallopeptidase 10                                           |
| MMP11   | matrix metallopeptidase 11                                           |
| MMP15   | matrix metallopeptidase 15                                           |
| MNAT1   | MNAT1, CDK activating kinase assembly factor                         |
| MSRA    | methionine sulfoxide reductase A                                     |
| MTIF2   | mitochondrial translational initiation factor 2                      |
| MYH9    | myosin, heavy chain 9, non-muscle                                    |
| MYH11   | myosin, heavy chain 11, smooth muscle                                |
| MYLK    | myosin light chain kinase                                            |
| NUBP1   | nucleotide binding protein 1                                         |
| NF2     | neurofibromin 2 (merlin)                                             |
| OLR1    | oxidized low density lipoprotein receptor 1                          |
| P4HB    | prolyl 4-hydroxylase subunit beta                                    |
| FURIN   | furin, paired basic amino acid cleaving enzyme                       |
| PCSK6   | proprotein convertase subtilisin/kexin type 6                        |
| PAK1    | p21 (RAC1) activated kinase 1                                        |
| PAK2    | p21 (RAC1) activated kinase 2                                        |
| PAM     | peptidylglycine alpha-amidating monooxygenase                        |
| PARK2   | parkin RBR E3 ubiquitin protein ligase                               |
| PCSK1   | proprotein convertase subtilisin/kexin type 1                        |
| PCSK5   | proprotein convertase subtilisin/kexin type 5                        |
| CDK17   | cyclin-dependent kinase 17                                           |
| PDPK1   | 3-phosphoinositide dependent protein kinase 1                        |
| PEPD    | peptidase D                                                          |
| PIGH    | phosphatidylinositol glycan anchor biosynthesis class H              |
| PIM1    | Pim-1 proto-oncogene, serine/threonine kinase                        |
| PLAT    | plasminogen activator, tissue type                                   |
| PLOD2   | procollagen-lysine,2-oxoglutarate 5-dioxygenase 2                    |
| PML     | promyelocytic leukemia                                               |
| PPM1B   | protein phosphatase, Mg <sup>2+</sup> /Mn <sup>2+</sup> dependent 1B |
| PPM1G   | protein phosphatase, Mg <sup>2+</sup> /Mn <sup>2+</sup> dependent 1G |
| PPP1CA  | protein phosphatase 1 catalytic subunit alpha                        |
| PPP2R2A | protein phosphatase 2 regulatory subunit B <sub>alpha</sub>          |
| PPP2R3A | protein phosphatase 2 regulatory subunit B' <sub>alpha</sub>         |
| PPP2R5C | protein phosphatase 2 regulatory subunit B' <sub>gamma</sub>         |
| PPT1    | palmitoyl-protein thioesterase 1                                     |
| PREP    | prolyl endopeptidase                                                 |
| SRGN    | serglycin                                                            |
| PRKAA1  | protein kinase AMP-activated catalytic subunit alpha 1               |
| PRKCB   | protein kinase C beta                                                |
| PRKCD   | protein kinase C delta                                               |
| PRKCE   | protein kinase C epsilon                                             |
| PRKCH   | protein kinase C eta                                                 |
| PKN1    | protein kinase N1                                                    |
| PKN2    | protein kinase N2                                                    |
| PRKCZ   | protein kinase C zeta                                                |
| PRKDC   | protein kinase, DNA-activated, catalytic polypeptide                 |



|         |                                                                                         |
|---------|-----------------------------------------------------------------------------------------|
| PRKG1   | protein kinase, cGMP-dependent, type I                                                  |
| PRKG2   | protein kinase, cGMP-dependent, type II                                                 |
| MAPK8   | mitogen-activated protein kinase 8                                                      |
| MAP2K6  | mitogen-activated protein kinase kinase 6                                               |
| PRLR    | prolactin receptor                                                                      |
| PTEN    | phosphatase and tensin homolog                                                          |
| PTK6    | protein tyrosine kinase 6                                                               |
| QSOX1   | quiescin sulfhydryl oxidase 1                                                           |
| PTPN3   | protein tyrosine phosphatase, non-receptor type 3                                       |
| PTPN4   | protein tyrosine phosphatase, non-receptor type 4                                       |
| PTPN6   | protein tyrosine phosphatase, non-receptor type 6                                       |
| PTPN7   | protein tyrosine phosphatase, non-receptor type 7                                       |
| PTPN12  | protein tyrosine phosphatase, non-receptor type 12                                      |
| PTPN14  | protein tyrosine phosphatase, non-receptor type 14                                      |
| PTPRB   | protein tyrosine phosphatase, receptor type B                                           |
| PTPRC   | protein tyrosine phosphatase, receptor type C                                           |
| PTPRD   | protein tyrosine phosphatase, receptor type D                                           |
| PTPRE   | protein tyrosine phosphatase, receptor type E                                           |
| PTPRH   | protein tyrosine phosphatase, receptor type H                                           |
| PTPRJ   | protein tyrosine phosphatase, receptor type J                                           |
| PTPRN2  | protein tyrosine phosphatase, receptor type N2                                          |
| PTPRO   | protein tyrosine phosphatase, receptor type O                                           |
| PTPRR   | protein tyrosine phosphatase, receptor type R                                           |
| PXN     | paxillin                                                                                |
| RAC1    | ras-related C3 botulinum toxin substrate 1 (rho family, small GTP binding protein Rac1) |
| REN     | renin                                                                                   |
| RPL3    | ribosomal protein L3                                                                    |
| RPL3L   | ribosomal protein L3 like                                                               |
| RPL7    | ribosomal protein L7                                                                    |
| RPL7A   | ribosomal protein L7a                                                                   |
| RPL18A  | ribosomal protein L18a                                                                  |
| RPL23A  | ribosomal protein L23a                                                                  |
| MRPL23  | mitochondrial ribosomal protein L23                                                     |
| RPL24   | ribosomal protein L24                                                                   |
| RPL26   | ribosomal protein L26                                                                   |
| RPN1    | ribophorin I                                                                            |
| RPS2    | ribosomal protein S2                                                                    |
| RPS6KB2 | ribosomal protein S6 kinase B2                                                          |
| RPS11   | ribosomal protein S11                                                                   |
| RRBP1   | ribosome binding protein 1                                                              |
| CCL2    | C-C motif chemokine ligand 2                                                            |
| CCL11   | C-C motif chemokine ligand 11                                                           |
| SFTPD   | surfactant protein D                                                                    |
| SGK1    | serum/glucocorticoid regulated kinase 1                                                 |
| SCG5    | secretogranin V                                                                         |
| SGSH    | N-sulfoglucosamine sulfohydrolase                                                       |
| SHH     | sonic hedgehog                                                                          |
| SIAH2   | siah E3 ubiquitin protein ligase 2                                                      |
| SPG7    | SPG7, paraplegin matrix AAA peptidase subunit                                           |
| SPRR1A  | small proline rich protein 1A                                                           |
| SRC     | SRC proto-oncogene, non-receptor tyrosine kinase                                        |
| SRP72   | signal recognition particle 72kDa                                                       |
| SRPK1   | SRSF protein kinase 1                                                                   |
| SRPK2   | SRSF protein kinase 2                                                                   |
| ST14    | suppression of tumorigenicity 14                                                        |
| NEK4    | NIMA related kinase 4                                                                   |
| STK10   | serine/threonine kinase 10                                                              |

|         |                                                                   |
|---------|-------------------------------------------------------------------|
| SYT1    | synaptotagmin 1                                                   |
| TAPBP   | TAP binding protein (tapasin)                                     |
| TBCA    | tubulin folding cofactor A                                        |
| TBCD    | tubulin folding cofactor D                                        |
| TBCE    | tubulin folding cofactor E                                        |
| TGFBR1  | transforming growth factor beta receptor 1                        |
| TGM3    | transglutaminase 3                                                |
| TJP1    | tight junction protein 1                                          |
| TLR1    | toll like receptor 1                                              |
| TLR3    | toll like receptor 3                                              |
| TLR4    | toll like receptor 4                                              |
| TM4SF4  | transmembrane 4 L six family member 4                             |
| TSPAN4  | tetraspanin 4                                                     |
| TNP1    | transition protein 1                                              |
| TNXB    | tenascin XB                                                       |
| TP53    | tumor protein p53                                                 |
| TPP2    | tripeptidyl peptidase 2                                           |
| TRAF1   | TNF receptor associated factor 1                                  |
| TRAF6   | TNF receptor associated factor 6                                  |
| TTC1    | tetratricopeptide repeat domain 1                                 |
| TTN     | titin                                                             |
| UBB     | ubiquitin B                                                       |
| UBE2D1  | ubiquitin conjugating enzyme E2 D1                                |
| UBE2D3  | ubiquitin conjugating enzyme E2 D3                                |
| UBE2E1  | ubiquitin conjugating enzyme E2 E1                                |
| UBE2E2  | ubiquitin conjugating enzyme E2 E2                                |
| UBE2G1  | ubiquitin conjugating enzyme E2 G1                                |
| UBE2G2  | ubiquitin conjugating enzyme E2 G2                                |
| UBE2H   | ubiquitin conjugating enzyme E2 H                                 |
| UBE2I   | ubiquitin conjugating enzyme E2 I                                 |
| UBE2L3  | ubiquitin conjugating enzyme E2 L3                                |
| UBE2N   | ubiquitin conjugating enzyme E2 N                                 |
| UBE2V2  | ubiquitin conjugating enzyme E2 V2                                |
| UBE3A   | ubiquitin protein ligase E3A                                      |
| VCL     | vinculin                                                          |
| VHL     | von Hippel-Lindau tumor suppressor                                |
| VRK2    | vaccinia related kinase 2                                         |
| VWF     | von Willebrand factor                                             |
| WIPF1   | WAS/WASL interacting protein family member 1                      |
| EIF4H   | eukaryotic translation initiation factor 4H                       |
| XPNPEP1 | X-prolyl aminopeptidase (aminopeptidase P) 1, soluble             |
| USP7    | ubiquitin specific peptidase 7 (herpes virus-associated)          |
| ST8SIA4 | ST8 alpha-N-acetyl-neuraminide alpha-2,8-sialyltransferase 4      |
| EPM2A   | epilepsy, progressive myoclonus type 2A, Lafora disease (laforin) |
| KAT6A   | lysine acetyltransferase 6A                                       |
| NR4A3   | nuclear receptor subfamily 4 group A member 3                     |
| CDK2AP1 | cyclin-dependent kinase 2 associated protein 1                    |
| ST8SIA2 | ST8 alpha-N-acetyl-neuraminide alpha-2,8-sialyltransferase 2      |
| MKKS    | McKusick-Kaufman syndrome                                         |
| CHAF1B  | chromatin assembly factor 1 subunit B                             |
| PICALM  | phosphatidylinositol binding clathrin assembly protein            |
| ULK1    | unc-51 like autophagy activating kinase 1                         |
| LTBP4   | latent transforming growth factor beta binding protein 4          |
| NCK2    | NCK adaptor protein 2                                             |
| DYRK3   | dual specificity tyrosine phosphorylation regulated kinase 3      |
| TTF2    | transcription termination factor, RNA polymerase II               |
| TPST1   | tyrosylprotein sulfotransferase 1                                 |
| FKBP6   | FK506 binding protein 6                                           |

|          |                                                                          |
|----------|--------------------------------------------------------------------------|
| CDC42BPA | CDC42 binding protein kinase alpha                                       |
| DGKD     | diacylglycerol kinase delta                                              |
| CPZ      | carboxypeptidase Z                                                       |
| TCAP     | titin-cap                                                                |
| MKNK1    | MAP kinase interacting serine/threonine kinase 1                         |
| SCARF1   | scavenger receptor class F member 1                                      |
| TP63     | tumor protein p63                                                        |
| TNKS     | tankyrase                                                                |
| EIF3A    | eukaryotic translation initiation factor 3 subunit A                     |
| EIF3C    | eukaryotic translation initiation factor 3 subunit C                     |
| EIF3F    | eukaryotic translation initiation factor 3 subunit F                     |
| EIF3G    | eukaryotic translation initiation factor 3 subunit G                     |
| EIF3H    | eukaryotic translation initiation factor 3 subunit H                     |
| EIF4G3   | eukaryotic translation initiation factor 4 gamma 3                       |
| B3GALT4  | beta-1,3-galactosyltransferase 4                                         |
| B3GALNT1 | beta-1,3-N-acetylgalactosaminyltransferase 1 (globoside blood group)     |
| MBTPS1   | membrane bound transcription factor peptidase, site 1                    |
| CDKL1    | cyclin dependent kinase like 1                                           |
| DPM2     | dolichyl-phosphate mannosyltransferase polypeptide 2, regulatory subunit |
| EIF2B3   | eukaryotic translation initiation factor 2B subunit gamma                |
| PRPF4B   | pre-mRNA processing factor 4B                                            |
| ENDOUB   | endonuclease, poly(U) specific                                           |
| SKAP2    | src kinase associated phosphoprotein 2                                   |
| BTRC     | beta-transducin repeat containing E3 ubiquitin protein ligase            |
| WASL     | Wiskott-Aldrich syndrome like                                            |
| PLOD3    | procollagen-lysine,2-oxoglutarate 5-dioxygenase 3                        |
| RPS6KA4  | ribosomal protein S6 kinase A4                                           |
| KALRN    | kalirin, RhoGEF kinase                                                   |
| BRSK2    | BR serine/threonine kinase 2                                             |
| TM4SF5   | transmembrane 4 L six family member 5                                    |
| UBA3     | ubiquitin like modifier activating enzyme 3                              |
| SLC7A7   | solute carrier family 7 member 7                                         |
| SLC7A6   | solute carrier family 7 member 6                                         |
| MAP3K6   | mitogen-activated protein kinase kinase kinase 6                         |
| MTMR7    | myotubularin related protein 7                                           |
| HGS      | hepatocyte growth factor-regulated tyrosine kinase substrate             |
| DYRK1B   | dual specificity tyrosine phosphorylation regulated kinase 1B            |
| CTDP1    | CTD phosphatase subunit 1                                                |
| MAP3K13  | mitogen-activated protein kinase kinase kinase 13                        |
| ZW10     | zw10 kinetochore protein                                                 |
| DCLK1    | doublecortin like kinase 1                                               |
| GCNT3    | glucosaminyl (N-acetyl) transferase 3, mucin type                        |
| RPS6KA5  | ribosomal protein S6 kinase A5                                           |
| STK17B   | serine/threonine kinase 17b                                              |
| STK17A   | serine/threonine kinase 17a                                              |
| TGM5     | transglutaminase 5                                                       |
| VAMP3    | vesicle associated membrane protein 3                                    |
| SLC9A3R2 | SLC9A3 regulator 2                                                       |
| SLC9A3R1 | SLC9A3 regulator 1                                                       |
| HS6ST1   | heparan sulfate 6-O-sulfotransferase 1                                   |
| NMT2     | N-myristoyltransferase 2                                                 |
| MAP4K4   | mitogen-activated protein kinase kinase kinase kinase 4                  |
| ROCK2    | Rho associated coiled-coil containing protein kinase 2                   |
| ADAMTS4  | ADAM metalloproteinase with thrombospondin type 1 motif 4                |
| MPDU1    | mannose-P-dolichol utilization defect 1                                  |
| GMFG     | glia maturation factor gamma                                             |
| CDC42BPB | CDC42 binding protein kinase beta                                        |
| RNF14    | ring finger protein 14                                                   |

|          |                                                                                        |
|----------|----------------------------------------------------------------------------------------|
| ISG15    | ISG15 ubiquitin-like modifier                                                          |
| IKBKE    | inhibitor of kappa light polypeptide gene enhancer in B-cells, kinase epsilon          |
| KDM4A    | lysine demethylase 4A                                                                  |
| UBE3C    | ubiquitin protein ligase E3C                                                           |
| EDEM1    | ER degradation enhancing alpha-mannosidase like protein 1                              |
| ECE2     | endothelin converting enzyme 2                                                         |
| TLK1     | tousled like kinase 1                                                                  |
| OXS1     | oxidative stress responsive 1                                                          |
| HS3ST3B1 | heparan sulfate-glucosamine 3-sulfotransferase 3B1                                     |
| AKT3     | AKT serine/threonine kinase 3                                                          |
| RANBP9   | RAN binding protein 9                                                                  |
| DNAJB6   | DnaJ heat shock protein family (Hsp40) member B6                                       |
| PTPRU    | protein tyrosine phosphatase, receptor type U                                          |
| UST      | uronyl 2-sulfotransferase                                                              |
| HIPK3    | homeodomain interacting protein kinase 3                                               |
| AASS     | aminoadipate-semialdehyde synthase                                                     |
| CHST4    | carbohydrate sulfotransferase 4                                                        |
| TNK2     | tyrosine kinase non receptor 2                                                         |
| TRIB1    | tribbles pseudokinase 1                                                                |
| RIDA     | reactive intermediate imine deaminase A homolog                                        |
| APC2     | adenomatosis polyposis coli 2                                                          |
| TLR6     | toll like receptor 6                                                                   |
| NOD1     | nucleotide binding oligomerization domain containing 1                                 |
| ST3GAL6  | ST3 beta-galactoside alpha-2,3-sialyltransferase 6                                     |
| TESK2    | testis-specific kinase 2                                                               |
| PPIH     | peptidylprolyl isomerase H                                                             |
| CARM1    | coactivator associated arginine methyltransferase 1                                    |
| PITRM1   | pitrilysin metallopeptidase 1                                                          |
| ATG7     | autophagy related 7                                                                    |
| IGF2BP2  | insulin like growth factor 2 mRNA binding protein 2                                    |
| CAMKK2   | calcium/calmodulin-dependent protein kinase kinase 2                                   |
| FARS2    | phenylalanyl-tRNA synthetase 2, mitochondrial                                          |
| CORIN    | corin, serine peptidase                                                                |
| MAP3K2   | mitogen-activated protein kinase kinase kinase 2                                       |
| NEK6     | NIMA related kinase 6                                                                  |
| SEPT9    | septin 9                                                                               |
| WASF3    | WAS protein family member 3                                                            |
| TUBGCP2  | tubulin gamma complex associated protein 2                                             |
| CLPX     | caseinolytic mitochondrial matrix peptidase chaperone subunit                          |
| HPSE     | heparanase                                                                             |
| PPARGC1A | PPARG coactivator 1 alpha                                                              |
| MAN1A2   | mannosidase alpha class 1A member 2                                                    |
| PDIA5    | protein disulfide isomerase family A member 5                                          |
| METAP2   | methionyl aminopeptidase 2                                                             |
| ADRM1    | adhesion regulating molecule 1                                                         |
| WWP2     | WW domain containing E3 ubiquitin protein ligase 2                                     |
| LECT1    | leukocyte cell derived chemotaxin 1                                                    |
| UBE2C    | ubiquitin conjugating enzyme E2 C                                                      |
| TPPP     | tubulin polymerization promoting protein                                               |
| PTPRT    | protein tyrosine phosphatase, receptor type T                                          |
| FAF1     | Fas associated factor 1                                                                |
| MAP4K5   | mitogen-activated protein kinase kinase kinase kinase 5                                |
| MAP4K1   | mitogen-activated protein kinase kinase kinase kinase 1                                |
| IRAK3    | interleukin 1 receptor associated kinase 3                                             |
| DUSP10   | dual specificity phosphatase 10                                                        |
| MGAT4B   | mannosyl (alpha-1,3-)-glycoprotein beta-1,4-N-acetylglucosaminyltransferase, isozyme B |
| MGAT4A   | mannosyl (alpha-1,3-)-glycoprotein beta-1,4-N-                                         |

|         |                                                                   |
|---------|-------------------------------------------------------------------|
|         | acetylglucosaminyltransferase, isozyme A                          |
| STK38   | serine/threonine kinase 38                                        |
| LMTK2   | lemur tyrosine kinase 2                                           |
| TRAK1   | trafficking kinesin protein 1                                     |
| MAPRE1  | microtubule associated protein RP/EB family member 1              |
| KIFAP3  | kinesin associated protein 3                                      |
| ATF6    | activating transcription factor 6                                 |
| MAST1   | microtubule associated serine/threonine kinase 1                  |
| STK38L  | serine/threonine kinase 38 like                                   |
| SAMD4A  | sterile alpha motif domain containing 4A                          |
| SMG1    | SMG1, nonsense mediated mRNA decay associated PI3K related kinase |
| ERC1    | ELKS/RAB6-interacting/CAST family member 1                        |
| ATG4B   | autophagy related 4B cysteine peptidase                           |
| CLASP1  | cytoplasmic linker associated protein 1                           |
| SIK3    | SIK family kinase 3                                               |
| SF3B3   | splicing factor 3b subunit 3                                      |
| ICMT    | isoprenylcysteine carboxyl methyltransferase                      |
| KAT6B   | lysine acetyltransferase 6B                                       |
| CLDN14  | claudin 14                                                        |
| CD2AP   | CD2-associated protein                                            |
| BACE1   | beta-secretase 1                                                  |
| CBLC    | Cbl proto-oncogene C                                              |
| PRKD3   | protein kinase D3                                                 |
| AIPL1   | aryl hydrocarbon receptor interacting protein like 1              |
| FBXO7   | F-box protein 7                                                   |
| QPCT    | glutaminy-peptide cyclotransferase                                |
| GLCE    | glucuronic acid epimerase                                         |
| FBXW2   | F-box and WD repeat domain containing 2                           |
| FBXL6   | F-box and leucine-rich repeat protein 6                           |
| FBXO22  | F-box protein 22                                                  |
| FBXO3   | F-box protein 3                                                   |
| LATS2   | large tumor suppressor kinase 2                                   |
| EIF2AK1 | eukaryotic translation initiation factor 2 alpha kinase 1         |
| SERP1   | stress-associated endoplasmic reticulum protein 1                 |
| TRIB2   | tribbles pseudokinase 2                                           |
| MYLIP   | myosin regulatory light chain interacting protein                 |
| NPC1L1  | NPC1 like intracellular cholesterol transporter 1                 |
| EEF2K   | eukaryotic elongation factor 2 kinase                             |
| MINK1   | misshapen like kinase 1                                           |
| CHST11  | carbohydrate (chondroitin 4) sulfotransferase 11                  |
| IL20    | interleukin 20                                                    |
| NDUFA13 | NADH:ubiquinone oxidoreductase subunit A13                        |
| YBX2    | Y-box binding protein 2                                           |
| SEPSECS | Sep (O-phosphoserine) tRNA:Sec (selenocysteine) tRNA synthase     |
| A4GNT   | alpha-1,4-N-acetylglucosaminyltransferase                         |
| ING4    | inhibitor of growth family member 4                               |
| ABI3    | ABI family member 3                                               |
| CDKL3   | cyclin dependent kinase like 3                                    |
| GCNT4   | glucosaminyl (N-acetyl) transferase 4, core 2                     |
| FZR1    | fizzy/cell division cycle 20 related 1                            |
| TAOK3   | TAO kinase 3                                                      |
| UBR5    | ubiquitin protein ligase E3 component n-recognin 5                |
| LIMA1   | LIM domain and actin binding 1                                    |
| PIGT    | phosphatidylinositol glycan anchor biosynthesis class T           |
| SUFU    | SUFU negative regulator of hedgehog signaling                     |
| ERAP1   | endoplasmic reticulum aminopeptidase 1                            |
| ZAK     | sterile alpha motif and leucine zipper containing kinase AZK      |
| GALNT7  | polypeptide N-acetylgalactosaminyltransferase 7                   |

|            |                                                                          |
|------------|--------------------------------------------------------------------------|
| RIPK4      | receptor interacting serine/threonine kinase 4                           |
| TLR9       | toll like receptor 9                                                     |
| SSH1       | slingshot protein phosphatase 1                                          |
| PRMT7      | protein arginine methyltransferase 7                                     |
| SNRK       | SNF related kinase                                                       |
| PIGG       | phosphatidylinositol glycan anchor biosynthesis class G                  |
| CLN6       | ceroid-lipofuscinosis, neuronal 6, late infantile, variant               |
| FBXW7      | F-box and WD repeat domain containing 7                                  |
| CHST12     | carbohydrate (chondroitin 4) sulfotransferase 12                         |
| CDC42BPG   | CDC42 binding protein kinase gamma                                       |
| CDKN2AIP   | CDKN2A interacting protein                                               |
| PIGV       | phosphatidylinositol glycan anchor biosynthesis class V                  |
| SEPT11     | septin 11                                                                |
| CSGALNACT1 | chondroitin sulfate N-acetylgalactosaminyltransferase 1                  |
| CAND1      | cullin associated and neddylation dissociated 1                          |
| CENPJ      | centromere protein J                                                     |
| ALG1       | ALG1, chitobiosyldiphosphodolichol beta-mannosyltransferase              |
| PARD3      | par-3 family cell polarity regulator                                     |
| DUSP22     | dual specificity phosphatase 22                                          |
| ADAMTS9    | ADAM metalloproteinase with thrombospondin type 1 motif 9                |
| GOPC       | golgi-associated PDZ and coiled-coil motif containing                    |
| MAN1C1     | mannosidase alpha class 1C member 1                                      |
| SMURF1     | SMAD specific E3 ubiquitin protein ligase 1                              |
| DOLPP1     | dolichyldiphosphatase 1                                                  |
| PREX1      | phosphatidylinositol-3,4,5-trisphosphate dependent Rac exchange factor 1 |
| MARK4      | microtubule affinity regulating kinase 4                                 |
| SIGIRR     | single immunoglobulin and toll-interleukin 1 receptor (TIR) domain       |
| NECAB3     | N-terminal EF-hand calcium binding protein 3                             |
| NOD2       | nucleotide binding oligomerization domain containing 2                   |
| DNAJC1     | DnaJ heat shock protein family (Hsp40) member C1                         |
| NSD1       | nuclear receptor binding SET domain protein 1                            |
| CHST8      | carbohydrate sulfotransferase 8                                          |
| SMURF2     | SMAD specific E3 ubiquitin protein ligase 2                              |
| PINK1      | PTEN induced putative kinase 1                                           |
| WNK1       | WNK lysine deficient protein kinase 1                                    |
| BOLL       | boule homolog, RNA binding protein                                       |
| MIS12      | MIS12, kinetochore complex component                                     |
| CARD14     | caspase recruitment domain family member 14                              |
| ISOC2      | isochorismatase domain containing 2                                      |
| EHMT1      | euchromatic histone lysine methyltransferase 1                           |
| NEK11      | NIMA related kinase 11                                                   |
| HDAC11     | histone deacetylase 11                                                   |
| NAA15      | N(alpha)-acetyltransferase 15, NatA auxiliary subunit                    |
| NAA50      | N(alpha)-acetyltransferase 50, NatE catalytic subunit                    |
| SCUBE1     | signal peptide, CUB domain and EGF like domain containing 1              |
| CD276      | CD276 molecule                                                           |
| TLN2       | talin 2                                                                  |
| MEX3B      | mex-3 RNA binding family member B                                        |
| TRAF7      | TNF receptor associated factor 7                                         |
| ING5       | inhibitor of growth family member 5                                      |
| BRSK1      | BR serine/threonine kinase 1                                             |
| KIAA1804   | mixed lineage kinase 4                                                   |
| PARD6B     | par-6 family cell polarity regulator beta                                |
| C9orf3     | chromosome 9 open reading frame 3                                        |
| ATG4C      | autophagy related 4C cysteine peptidase                                  |
| ATG4D      | autophagy related 4D cysteine peptidase                                  |
| SSH2       | slingshot protein phosphatase 2                                          |
| HPS4       | HPS4, biogenesis of lysosomal organelles complex 3 subunit 2             |

|                        |                                                                   |
|------------------------|-------------------------------------------------------------------|
| NLRP12                 | NLR family, pyrin domain containing 12                            |
| TP53RK                 | TP53 regulating kinase                                            |
| NLRP3                  | NLR family, pyrin domain containing 3                             |
| IL22RA2                | interleukin 22 receptor subunit alpha 2                           |
| UHMK1                  | U2AF homology motif (UHM) kinase 1                                |
| IL31RA                 | interleukin 31 receptor A                                         |
| SIK1                   | salt inducible kinase 1                                           |
| PPP4R2                 | protein phosphatase 4 regulatory subunit 2                        |
| TMPRSS6                | transmembrane protease, serine 6                                  |
| MUC20                  | mucin 20, cell surface associated                                 |
| STT3B                  | STT3B, catalytic subunit of the oligosaccharyltransferase complex |
| HS3ST5                 | heparan sulfate-glucosamine 3-sulfotransferase 5                  |
| SCUBE3                 | signal peptide, CUB domain and EGF like domain containing 3       |
| MAPK15                 | mitogen-activated protein kinase 15                               |
| MSRB3                  | methionine sulfoxide reductase B3                                 |
| METAP1D                | methionyl aminopeptidase type 1D (mitochondrial)                  |
| RNF144B                | ring finger protein 144B                                          |
| COX18                  | COX18 cytochrome c oxidase assembly factor                        |
| NDUFS7                 | NADH:ubiquinone oxidoreductase core subunit S7                    |
| AGRN                   | agrin                                                             |
| CCDC88C                | coiled-coil domain containing 88C                                 |
| EIF2AK4                | eukaryotic translation initiation factor 2 alpha kinase 4         |
| D2HGDH                 | D-2-hydroxyglutarate dehydrogenase                                |
| <b>Phosphorylation</b> |                                                                   |
| <b>Gene Symbol</b>     | <b>Name Gene</b>                                                  |
| ABL1                   | ABL proto-oncogene 1, non-receptor tyrosine kinase                |
| ABL2                   | ABL proto-oncogene 2, non-receptor tyrosine kinase                |
| ACVR1                  | activin A receptor type 1                                         |
| ACVRL1                 | activin A receptor like type 1                                    |
| AKT1                   | AKT serine/threonine kinase 1                                     |
| BARD1                  | BRCA1 associated RING domain 1                                    |
| CCND1                  | cyclin D1                                                         |
| BCR                    | BCR, RhoGEF and GTPase activating protein                         |
| BMP4                   | bone morphogenetic protein 4                                      |
| BMPR1A                 | bone morphogenetic protein receptor type 1A                       |
| BMPR1B                 | bone morphogenetic protein receptor type 1B                       |
| BRAF                   | B-Raf proto-oncogene, serine/threonine kinase                     |
| CAMK2A                 | calcium/calmodulin dependent protein kinase II alpha              |
| CAMK2B                 | calcium/calmodulin dependent protein kinase II beta               |
| CCND2                  | cyclin D2                                                         |
| CCND3                  | cyclin D3                                                         |
| CD80                   | CD80 molecule                                                     |
| CD81                   | CD81 molecule                                                     |
| CDK11B                 | cyclin-dependent kinase 11B                                       |
| CDKN1A                 | cyclin-dependent kinase inhibitor 1A                              |
| CDKN2C                 | cyclin-dependent kinase inhibitor 2C                              |
| PLK3                   | polo like kinase 3                                                |
| MAP3K8                 | mitogen-activated protein kinase kinase kinase 8                  |
| CSNK1A1                | casein kinase 1 alpha 1                                           |
| CSNK1D                 | casein kinase 1 delta                                             |
| CSNK1G2                | casein kinase 1 gamma 2                                           |
| CTBP1                  | C-terminal binding protein 1                                      |
| DAPK1                  | death associated protein kinase 1                                 |
| DAPK3                  | death-associated protein kinase 3                                 |
| DMPK                   | dystrophia myotonica protein kinase                               |
| DYRK1A                 | dual specificity tyrosine phosphorylation regulated kinase 1A     |
| EGFR                   | epidermal growth factor receptor                                  |
| MARK2                  | microtubule affinity regulating kinase 2                          |

|         |                                                         |
|---------|---------------------------------------------------------|
| EPHA8   | EPH receptor A8                                         |
| EPHB2   | EPH receptor B2                                         |
| ERBB2   | erb-b2 receptor tyrosine kinase 2                       |
| ERBB3   | erb-b2 receptor tyrosine kinase 3                       |
| ERG     | v-ets avian erythroblastosis virus E26 oncogene homolog |
| ERN1    | endoplasmic reticulum to nucleus signaling 1            |
| F2      | coagulation factor II, thrombin                         |
| F2R     | coagulation factor II thrombin receptor                 |
| FGR     | FGR proto-oncogene, Src family tyrosine kinase          |
| FRK     | fyn related Src family tyrosine kinase                  |
| MTOR    | mechanistic target of rapamycin                         |
| FYB     | FYN binding protein                                     |
| MKNK2   | MAP kinase interacting serine/threonine kinase 2        |
| GSK3B   | glycogen synthase kinase 3 beta                         |
| HCLS1   | hematopoietic cell-specific Lyn substrate 1             |
| IGF1R   | insulin like growth factor 1 receptor                   |
| IL12A   | interleukin 12A                                         |
| INHBA   | inhibin beta A                                          |
| INSR    | insulin receptor                                        |
| IRAK2   | interleukin 1 receptor associated kinase 2              |
| ITGB2   | integrin subunit beta 2                                 |
| JAK2    | Janus kinase 2                                          |
| JAK3    | Janus kinase 3                                          |
| LCK     | LCK proto-oncogene, Src family tyrosine kinase          |
| LIMK1   | LIM domain kinase 1                                     |
| LYN     | LYN proto-oncogene, Src family tyrosine kinase          |
| MATK    | megakaryocyte-associated tyrosine kinase                |
| MCM7    | minichromosome maintenance complex component 7          |
| MAP3K3  | mitogen-activated protein kinase kinase kinase 3        |
| MAP3K9  | mitogen-activated protein kinase kinase kinase 9        |
| MAP3K11 | mitogen-activated protein kinase kinase kinase 11       |
| MYLK    | myosin light chain kinase                               |
| NF2     | neurofibromin 2 (merlin)                                |
| PAK1    | p21 (RAC1) activated kinase 1                           |
| PAK2    | p21 (RAC1) activated kinase 2                           |
| CDK17   | cyclin-dependent kinase 17                              |
| PDPK1   | 3-phosphoinositide dependent protein kinase 1           |
| PIM1    | Pim-1 proto-oncogene, serine/threonine kinase           |
| PIK3R1  | phosphoinositide-3-kinase regulatory subunit 1          |
| PRKAA1  | protein kinase AMP-activated catalytic subunit alpha 1  |
| PRKCB   | protein kinase C beta                                   |
| PRKCD   | protein kinase C delta                                  |
| PRKCE   | protein kinase C epsilon                                |
| PRKCH   | protein kinase C eta                                    |
| PKN1    | protein kinase N1                                       |
| PKN2    | protein kinase N2                                       |
| PRKCZ   | protein kinase C zeta                                   |
| PRKG1   | protein kinase, cGMP-dependent, type I                  |
| PRKG2   | protein kinase, cGMP-dependent, type II                 |
| MAPK8   | mitogen-activated protein kinase 8                      |
| MAP2K6  | mitogen-activated protein kinase kinase 6               |
| PTK6    | protein tyrosine kinase 6                               |
| RAF1    | Raf-1 proto-oncogene, serine/threonine kinase           |
| RET     | ret proto-oncogene                                      |
| CCL2    | C-C motif chemokine ligand 2                            |
| CCL11   | C-C motif chemokine ligand 11                           |
| SGK1    | serum/glucocorticoid regulated kinase 1                 |
| SRP72   | signal recognition particle 72kDa                       |



|          |                                                                               |
|----------|-------------------------------------------------------------------------------|
| SRPK1    | SRSF protein kinase 1                                                         |
| SRPK2    | SRSF protein kinase 2                                                         |
| NEK4     | NIMA related kinase 4                                                         |
| STK10    | serine/threonine kinase 10                                                    |
| TGFBR1   | transforming growth factor beta receptor 1                                    |
| TTN      | titin                                                                         |
| TXK      | TXK tyrosine kinase                                                           |
| VRK2     | vaccinia related kinase 2                                                     |
| NR4A3    | nuclear receptor subfamily 4 group A member 3                                 |
| CDK2AP1  | cyclin-dependent kinase 2 associated protein 1                                |
| ULK1     | unc-51 like autophagy activating kinase 1                                     |
| DYRK3    | dual specificity tyrosine phosphorylation regulated kinase 3                  |
| DYRK2    | dual specificity tyrosine phosphorylation regulated kinase 2                  |
| CDC42BPA | CDC42 binding protein kinase alpha                                            |
| MKNK1    | MAP kinase interacting serine/threonine kinase 1                              |
| TNKS     | tankyrase                                                                     |
| CDKL1    | cyclin dependent kinase like 1                                                |
| PRPF4B   | pre-mRNA processing factor 4B                                                 |
| RPS6KA4  | ribosomal protein S6 kinase A4                                                |
| KALRN    | kalirin, RhoGEF kinase                                                        |
| BRSK2    | BR serine/threonine kinase 2                                                  |
| MAP3K6   | mitogen-activated protein kinase kinase kinase 6                              |
| DYRK1B   | dual specificity tyrosine phosphorylation regulated kinase 1B                 |
| MAP3K13  | mitogen-activated protein kinase kinase kinase 13                             |
| DCLK1    | doublecortin like kinase 1                                                    |
| RPS6KA5  | ribosomal protein S6 kinase A5                                                |
| STK17B   | serine/threonine kinase 17b                                                   |
| STK17A   | serine/threonine kinase 17a                                                   |
| MAP4K4   | mitogen-activated protein kinase kinase kinase kinase 4                       |
| ROCK2    | Rho associated coiled-coil containing protein kinase 2                        |
| GMFG     | glia maturation factor gamma                                                  |
| CDC42BPB | CDC42 binding protein kinase beta                                             |
| IKBKE    | inhibitor of kappa light polypeptide gene enhancer in B-cells, kinase epsilon |
| IP6K1    | inositol hexakisphosphate kinase 1                                            |
| TLK1     | tousled like kinase 1                                                         |
| OXS1     | oxidative stress responsive 1                                                 |
| AKT3     | AKT serine/threonine kinase 3                                                 |
| HIPK3    | homeodomain interacting protein kinase 3                                      |
| TNK2     | tyrosine kinase non receptor 2                                                |
| TRIB1    | tribbles pseudokinase 1                                                       |
| BCKDK    | branched chain ketoacid dehydrogenase kinase                                  |
| TESK2    | testis-specific kinase 2                                                      |
| MERTK    | MER proto-oncogene, tyrosine kinase                                           |
| CAMKK2   | calcium/calmodulin-dependent protein kinase kinase 2                          |
| MAP3K2   | mitogen-activated protein kinase kinase kinase 2                              |
| NEK6     | NIMA related kinase 6                                                         |
| GLMN     | glomulin, FKBP associated protein                                             |
| MAP4K5   | mitogen-activated protein kinase kinase kinase kinase 5                       |
| MAP4K1   | mitogen-activated protein kinase kinase kinase kinase 1                       |
| IRAK3    | interleukin 1 receptor associated kinase 3                                    |
| PNKP     | polynucleotide kinase 3'-phosphatase                                          |
| STK38    | serine/threonine kinase 38                                                    |
| LMTK2    | lemur tyrosine kinase 2                                                       |
| MAST1    | microtubule associated serine/threonine kinase 1                              |
| STK38L   | serine/threonine kinase 38 like                                               |
| SMG1     | SMG1, nonsense mediated mRNA decay associated PI3K related kinase             |
| ERC1     | ELKS/RAB6-interacting/CAST family member 1                                    |
| MAST2    | microtubule associated serine/threonine kinase 2                              |

|                                        |                                                              |
|----------------------------------------|--------------------------------------------------------------|
| SIK3                                   | SIK family kinase 3                                          |
| DAPK2                                  | death-associated protein kinase 2                            |
| CBLC                                   | Cbl proto-oncogene C                                         |
| PRKD3                                  | protein kinase D3                                            |
| LATS2                                  | large tumor suppressor kinase 2                              |
| EIF2AK1                                | eukaryotic translation initiation factor 2 alpha kinase 1    |
| STK36                                  | serine/threonine kinase 36                                   |
| TRIB2                                  | tribbles pseudokinase 2                                      |
| MINK1                                  | misshapen like kinase 1                                      |
| IL20                                   | interleukin 20                                               |
| ABI3                                   | ABI family member 3                                          |
| TAOK3                                  | TAO kinase 3                                                 |
| IP6K2                                  | inositol hexakisphosphate kinase 2                           |
| ZAK                                    | sterile alpha motif and leucine zipper containing kinase AZK |
| RIPK4                                  | receptor interacting serine/threonine kinase 4               |
| TOLLIP                                 | toll interacting protein                                     |
| SNRK                                   | SNF related kinase                                           |
| PXK                                    | PX domain containing serine/threonine kinase like            |
| CDC42BPG                               | CDC42 binding protein kinase gamma                           |
| MARK4                                  | microtubule affinity regulating kinase 4                     |
| PINK1                                  | PTEN induced putative kinase 1                               |
| WNK1                                   | WNK lysine deficient protein kinase 1                        |
| WNK2                                   | WNK lysine deficient protein kinase 2                        |
| CARD14                                 | caspase recruitment domain family member 14                  |
| NEK11                                  | NIMA related kinase 11                                       |
| MEX3B                                  | mex-3 RNA binding family member B                            |
| BRSK1                                  | BR serine/threonine kinase 1                                 |
| KIAA1804                               | mixed lineage kinase 4                                       |
| NLRP12                                 | NLR family, pyrin domain containing 12                       |
| TP53RK                                 | TP53 regulating kinase                                       |
| IL22RA2                                | interleukin 22 receptor subunit alpha 2                      |
| UHMK1                                  | U2AF homology motif (UHM) kinase 1                           |
| IL31RA                                 | interleukin 31 receptor A                                    |
| SIK1                                   | salt inducible kinase 1                                      |
| MAPK15                                 | mitogen-activated protein kinase 15                          |
| CCDC88C                                | coiled-coil domain containing 88C                            |
| EIF2AK4                                | eukaryotic translation initiation factor 2 alpha kinase 4    |
| <b>Intracellular Signaling cascade</b> |                                                              |
| <b>Gene Symbol</b>                     | <b>Name Gene</b>                                             |
| ABCA1                                  | ATP binding cassette subfamily A member 1                    |
| ABL1                                   | ABL proto-oncogene 1, non-receptor tyrosine kinase           |
| ABR                                    | active BCR-related                                           |
| ADCY7                                  | adenylate cyclase 7                                          |
| ADORA2B                                | adenosine A2b receptor                                       |
| ADORA3                                 | adenosine A3 receptor                                        |
| ADRA1B                                 | adrenoceptor alpha 1B                                        |
| ADRA2C                                 | adrenoceptor alpha 2C                                        |
| AGTR1                                  | angiotensin II receptor type 1                               |
| AKT1                                   | AKT serine/threonine kinase 1                                |
| AMBP                                   | alpha-1-microglobulin/bikunin precursor                      |
| FASLG                                  | Fas ligand                                                   |
| RHOB                                   | ras homolog family member B                                  |
| ARHGDI A                               | Rho GDP dissociation inhibitor alpha                         |
| ARHGDI B                               | Rho GDP dissociation inhibitor beta                          |
| RHOH                                   | ras homolog family member H                                  |
| AVPR1A                                 | arginine vasopressin receptor 1A                             |
| AZU1                                   | azurocidin 1                                                 |
| BAD                                    | BCL2 associated agonist of cell death                        |

|        |                                                     |
|--------|-----------------------------------------------------|
| BID    | BH3 interacting domain death agonist                |
| BLK    | BLK proto-oncogene, Src family tyrosine kinase      |
| BNIP3  | BCL2/adenovirus E1B 19kDa interacting protein 3     |
| BRCA1  | breast cancer 1                                     |
| BST2   | bone marrow stromal cell antigen 2                  |
| CAPS   | calcyphosine                                        |
| CASP3  | caspase 3                                           |
| CASP8  | caspase 8                                           |
| CASP9  | caspase 9                                           |
| CCKAR  | cholecystokinin A receptor                          |
| CCKBR  | cholecystokinin B receptor                          |
| CD81   | CD81 molecule                                       |
| CDH13  | cadherin 13                                         |
| FOXP3  | forkhead box N3                                     |
| CHRM1  | cholinergic receptor muscarinic 1                   |
| CHRM2  | cholinergic receptor muscarinic 2                   |
| CHRM5  | cholinergic receptor muscarinic 5                   |
| CIDEA  | cell death-inducing DFFA-like effector a            |
| CCR3   | C-C motif chemokine receptor 3                      |
| LTB4R  | leukotriene B4 receptor                             |
| CNR1   | cannabinoid receptor 1 (brain)                      |
| CNR2   | cannabinoid receptor 2                              |
| COL4A3 | collagen type IV alpha 3                            |
| CRHR1  | corticotropin releasing hormone receptor 1          |
| CRHR2  | corticotropin releasing hormone receptor 2          |
| DGKA   | diacylglycerol kinase alpha                         |
| DAPK1  | death associated protein kinase 1                   |
| DAPK3  | death-associated protein kinase 3                   |
| DAXX   | death-domain associated protein                     |
| DMPK   | dystrophia myotonica protein kinase                 |
| DOCK1  | dedicator of cytokinesis 1                          |
| DRD1   | dopamine receptor D1                                |
| DRD5   | dopamine receptor D5                                |
| DUSP2  | dual specificity phosphatase 2                      |
| DUSP4  | dual specificity phosphatase 4                      |
| DUSP6  | dual specificity phosphatase 6                      |
| ECM1   | extracellular matrix protein 1                      |
| EDN2   | endothelin 2                                        |
| EDNRA  | endothelin receptor type A                          |
| EDNRB  | endothelin receptor type B                          |
| EGFR   | epidermal growth factor receptor                    |
| MARK2  | microtubule affinity regulating kinase 2            |
| ERN1   | endoplasmic reticulum to nucleus signaling 1        |
| F2     | coagulation factor II, thrombin                     |
| F2R    | coagulation factor II thrombin receptor             |
| FGFR1  | fibroblast growth factor receptor 1                 |
| FGFR3  | fibroblast growth factor receptor 3                 |
| FYB    | FYN binding protein                                 |
| FYN    | FYN proto-oncogene, Src family tyrosine kinase      |
| IFI6   | interferon alpha inducible protein 6                |
| GABBR1 | gamma-aminobutyric acid type B receptor subunit 1   |
| GAP43  | growth associated protein 43                        |
| GHRH   | growth hormone releasing hormone                    |
| GIPR   | gastric inhibitory polypeptide receptor             |
| GJA1   | gap junction protein alpha 1                        |
| GLP1R  | glucagon like peptide 1 receptor                    |
| GML    | glycosylphosphatidylinositol anchored molecule like |
| GNA15  | G protein subunit alpha 15                          |

|         |                                                   |
|---------|---------------------------------------------------|
| GNAS    | GNAS complex locus                                |
| GNB1    | G protein subunit beta 1                          |
| SFN     | stratifin                                         |
| XCR1    | X-C motif chemokine receptor 1                    |
| MCHR1   | melanin concentrating hormone receptor 1          |
| GRK5    | G protein-coupled receptor kinase 5               |
| MKNK2   | MAP kinase interacting serine/threonine kinase 2  |
| GPS1    | G protein pathway suppressor 1                    |
| GRB2    | growth factor receptor bound protein 2            |
| GRM2    | glutamate metabotropic receptor 2                 |
| GRM3    | glutamate metabotropic receptor 3                 |
| GRM4    | glutamate metabotropic receptor 4                 |
| GRM8    | glutamate metabotropic receptor 8                 |
| GSK3B   | glycogen synthase kinase 3 beta                   |
| GZMA    | granzyme A                                        |
| GZMB    | granzyme B                                        |
| HCLS1   | hematopoietic cell-specific Lyn substrate 1       |
| HIP1    | huntingtin interacting protein 1                  |
| HRH1    | histamine receptor H1                             |
| HRH2    | histamine receptor H2                             |
| HTR1B   | 5-hydroxytryptamine receptor 1B                   |
| HTR1F   | 5-hydroxytryptamine receptor 1F                   |
| HTR6    | 5-hydroxytryptamine receptor 6                    |
| IFNAR2  | interferon alpha and beta receptor subunit 2      |
| IGF1    | insulin like growth factor 1                      |
| CXCR2   | C-X-C motif chemokine receptor 2                  |
| IL12A   | interleukin 12A                                   |
| IRAK2   | interleukin 1 receptor associated kinase 2        |
| JAK2    | Janus kinase 2                                    |
| STMN1   | stathmin 1                                        |
| LCK     | LCK proto-oncogene, Src family tyrosine kinase    |
| LGALS1  | galectin 1                                        |
| LGALS9  | galectin 9                                        |
| LIMK1   | LIM domain kinase 1                               |
| LTBR    | lymphotoxin beta receptor                         |
| LYN     | LYN proto-oncogene, Src family tyrosine kinase    |
| SMAD3   | SMAD family member 3                              |
| MC1R    | melanocortin 1 receptor                           |
| MC4R    | melanocortin 4 receptor                           |
| MCL1    | myeloid cell leukemia 1                           |
| MDFI    | MyoD family inhibitor                             |
| MAP3K3  | mitogen-activated protein kinase kinase kinase 3  |
| MAP3K4  | mitogen-activated protein kinase kinase kinase 4  |
| MAP3K5  | mitogen-activated protein kinase kinase kinase 5  |
| MAP3K9  | mitogen-activated protein kinase kinase kinase 9  |
| MAP3K11 | mitogen-activated protein kinase kinase kinase 11 |
| MTNR1A  | melatonin receptor 1A                             |
| GADD45B | growth arrest and DNA damage inducible beta       |
| MYO9B   | myosin IXB                                        |
| NF1     | neurofibromin 1                                   |
| NF2     | neurofibromin 2 (merlin)                          |
| NFATC1  | nuclear factor of activated T-cells 1             |
| NPY     | neuropeptide Y                                    |
| OPRD1   | opioid receptor delta 1                           |
| OPRL1   | opioid related nociceptin receptor 1              |
| OPRM1   | opioid receptor mu 1                              |
| P2RY1   | purinergic receptor P2Y1                          |
| P2RY2   | purinergic receptor P2Y2                          |

|          |                                                                                         |
|----------|-----------------------------------------------------------------------------------------|
| PAK1     | p21 (RAC1) activated kinase 1                                                           |
| PDK1     | pyruvate dehydrogenase kinase 1                                                         |
| PDPK1    | 3-phosphoinositide dependent protein kinase 1                                           |
| PLCB2    | phospholipase C beta 2                                                                  |
| PLD1     | phospholipase D1                                                                        |
| PML      | promyelocytic leukemia                                                                  |
| PPM1A    | protein phosphatase, Mg <sup>2+</sup> /Mn <sup>2+</sup> dependent 1A                    |
| PPT1     | palmitoyl-protein thioesterase 1                                                        |
| PRKAR2A  | protein kinase cAMP-dependent type II regulatory subunit alpha                          |
| PKN1     | protein kinase N1                                                                       |
| MAPK8    | mitogen-activated protein kinase 8                                                      |
| MAPK11   | mitogen-activated protein kinase 11                                                     |
| MAPK10   | mitogen-activated protein kinase 10                                                     |
| PTAFR    | platelet activating factor receptor                                                     |
| PTEN     | phosphatase and tensin homolog                                                          |
| PTGER4   | prostaglandin E receptor 4                                                              |
| RAC1     | ras-related C3 botulinum toxin substrate 1 (rho family, small GTP binding protein Rac1) |
| RAD9A    | RAD9 checkpoint clamp component A                                                       |
| RELA     | RELA proto-oncogene, NF-kB subunit                                                      |
| REN      | renin                                                                                   |
| RGS3     | regulator of G-protein signaling 3                                                      |
| RPS6KA2  | ribosomal protein S6 kinase A2                                                          |
| RRAD     | RRAD, Ras related glycolysis inhibitor and calcium channel regulator                    |
| RREB1    | ras responsive element binding protein 1                                                |
| RTKN     | rhotekin                                                                                |
| CCL2     | C-C motif chemokine ligand 2                                                            |
| SECTM1   | secreted and transmembrane 1                                                            |
| MAP2K4   | mitogen-activated protein kinase kinase 4                                               |
| SIAH2    | siah E3 ubiquitin protein ligase 2                                                      |
| SOD1     | superoxide dismutase 1, soluble                                                         |
| SOS1     | SOS Ras/Rac guanine nucleotide exchange factor 1                                        |
| SRC      | SRC proto-oncogene, non-receptor tyrosine kinase                                        |
| SRPK1    | SRSF protein kinase 1                                                                   |
| SRPK2    | SRSF protein kinase 2                                                                   |
| SSTR4    | somatostatin receptor 4                                                                 |
| SSTR5    | somatostatin receptor 5                                                                 |
| STAT3    | signal transducer and activator of transcription 3                                      |
| STAT5A   | signal transducer and activator of transcription 5A                                     |
| TACR1    | tachykinin receptor 1                                                                   |
| MAP3K7   | mitogen-activated protein kinase kinase kinase 7                                        |
| TNFRSF1A | tumor necrosis factor receptor superfamily member 1A                                    |
| TP53     | tumor protein p53                                                                       |
| TP73     | tumor protein p73                                                                       |
| TPD52L1  | tumor protein D52-like 1                                                                |
| TRAF5    | TNF receptor associated factor 5                                                        |
| TRAF6    | TNF receptor associated factor 6                                                        |
| TRIP6    | thyroid hormone receptor interactor 6                                                   |
| TSHR     | thyroid stimulating hormone receptor                                                    |
| UBE2N    | ubiquitin conjugating enzyme E2 N                                                       |
| VDAC1    | voltage dependent anion channel 1                                                       |
| VIPR1    | vasoactive intestinal peptide receptor 1                                                |
| YWHAE    | tyrosine 3-monooxygenase/tryptophan 5-monooxygenase activation protein epsilon          |
| SCG2     | secretogranin II                                                                        |
| NR4A3    | nuclear receptor subfamily 4 group A member 3                                           |
| ARID1A   | AT-rich interaction domain 1A                                                           |
| DYRK2    | dual specificity tyrosine phosphorylation regulated kinase 2                            |

|          |                                                                               |
|----------|-------------------------------------------------------------------------------|
| CDC42BPA | CDC42 binding protein kinase alpha                                            |
| MKNK1    | MAP kinase interacting serine/threonine kinase 1                              |
| S1PR4    | sphingosine-1-phosphate receptor 4                                            |
| TRADD    | TNFRSF1A associated via death domain                                          |
| RIPK1    | receptor interacting serine/threonine kinase 1                                |
| RIPK2    | receptor interacting serine/threonine kinase 2                                |
| SOCS2    | suppressor of cytokine signaling 2                                            |
| CFLAR    | CASP8 and FADD like apoptosis regulator                                       |
| RPS6KA4  | ribosomal protein S6 kinase A4                                                |
| KALRN    | kalirin, RhoGEF kinase                                                        |
| F2RL3    | F2R like thrombin/trypsin receptor 3                                          |
| MAP3K6   | mitogen-activated protein kinase kinase kinase 6                              |
| HGS      | hepatocyte growth factor-regulated tyrosine kinase substrate                  |
| LPAR2    | lysophosphatidic acid receptor 2                                              |
| MAP3K13  | mitogen-activated protein kinase kinase kinase 13                             |
| VAPA     | VAMP associated protein A                                                     |
| RPS6KA5  | ribosomal protein S6 kinase A5                                                |
| STK17B   | serine/threonine kinase 17b                                                   |
| STK17A   | serine/threonine kinase 17a                                                   |
| S1PR2    | sphingosine-1-phosphate receptor 2                                            |
| GRAP2    | GRB2-related adaptor protein 2                                                |
| ARHGAP29 | Rho GTPase activating protein 29                                              |
| MAP4K4   | mitogen-activated protein kinase kinase kinase kinase 4                       |
| AKAP7    | A-kinase anchoring protein 7                                                  |
| SH3BP5   | SH3 domain binding protein 5                                                  |
| LITAF    | lipopolysaccharide induced TNF factor                                         |
| CDC42BPB | CDC42 binding protein kinase beta                                             |
| CARTPT   | CART prepropeptide                                                            |
| IKBKE    | inhibitor of kappa light polypeptide gene enhancer in B-cells, kinase epsilon |
| ELMO1    | engulfment and cell motility 1                                                |
| FARP2    | FERM, ARH/RhoGEF and pleckstrin domain protein 2                              |
| MED24    | mediator complex subunit 24                                                   |
| TLK1     | tousled like kinase 1                                                         |
| MFN2     | mitofusin 2                                                                   |
| OXS1     | oxidative stress responsive 1                                                 |
| MED16    | mediator complex subunit 16                                                   |
| SH2D3C   | SH2 domain containing 3C                                                      |
| DNM1L    | dynamamin 1-like                                                              |
| WASF2    | WAS protein family member 2                                                   |
| TNK2     | tyrosine kinase non receptor 2                                                |
| CNKSR1   | connector enhancer of kinase suppressor of Ras 1                              |
| EFS      | embryonal Fyn-associated substrate                                            |
| TLR6     | toll like receptor 6                                                          |
| TFG      | TRK-fused gene                                                                |
| NOD1     | nucleotide binding oligomerization domain containing 1                        |
| VAV3     | vav guanine nucleotide exchange factor 3                                      |
| TAB1     | TGF-beta activated kinase 1/MAP3K7 binding protein 1                          |
| TRIM38   | tripartite motif containing 38                                                |
| CAP2     | CAP, adenylate cyclase-associated protein, 2 (yeast)                          |
| CAP1     | CAP, adenylate cyclase-associated protein 1 (yeast)                           |
| ARFGEF2  | ADP ribosylation factor guanine nucleotide exchange factor 2                  |
| SH2B2    | SH2B adaptor protein 2                                                        |
| CAMKK2   | calcium/calmodulin-dependent protein kinase kinase 2                          |
| MAP3K2   | mitogen-activated protein kinase kinase kinase 2                              |
| GRAP     | GRB2-related adaptor protein                                                  |
| TRAF3IP2 | TRAF3 interacting protein 2                                                   |
| PLK2     | polo like kinase 2                                                            |
| NEK6     | NIMA related kinase 6                                                         |

|           |                                                                      |
|-----------|----------------------------------------------------------------------|
| RALBP1    | ralA binding protein 1                                               |
| FAF1      | Fas associated factor 1                                              |
| MAP4K5    | mitogen-activated protein kinase kinase kinase kinase 5              |
| MAP4K1    | mitogen-activated protein kinase kinase kinase kinase 1              |
| RASSF1    | Ras association domain family member 1                               |
| AKAP11    | A-kinase anchoring protein 11                                        |
| DUSP10    | dual specificity phosphatase 10                                      |
| HRH3      | histamine receptor H3                                                |
| STK38     | serine/threonine kinase 38                                           |
| MRAS      | muscle RAS oncogene homolog                                          |
| CARD8     | caspase recruitment domain family member 8                           |
| ATF6      | activating transcription factor 6                                    |
| SCAP      | SREBF chaperone                                                      |
| MAST1     | microtubule associated serine/threonine kinase 1                     |
| ACIN1     | apoptotic chromatin condensation inducer 1                           |
| PLCH1     | phospholipase C eta 1                                                |
| STK38L    | serine/threonine kinase 38 like                                      |
| TNIK      | TRAF2 and NCK interacting kinase                                     |
| ERC1      | ELKS/RAB6-interacting/CAST family member 1                           |
| TAB2      | TGF-beta activated kinase 1/MAP3K7 binding protein 2                 |
| MAPK8IP3  | mitogen-activated protein kinase 8 interacting protein 3             |
| ZDHHC17   | zinc finger DHHC-type containing 17                                  |
| RBFOX2    | RNA binding protein, fox-1 homolog 2                                 |
| DDAH2     | dimethylarginine dimethylaminohydrolase 2                            |
| LPAR3     | lysophosphatidic acid receptor 3                                     |
| DDAH1     | dimethylarginine dimethylaminohydrolase 1                            |
| CARHSP1   | calcium regulated heat stable protein 1                              |
| DAPK2     | death-associated protein kinase 2                                    |
| PRKD3     | protein kinase D3                                                    |
| LATS2     | large tumor suppressor kinase 2                                      |
| ATP2C1    | ATPase secretory pathway Ca <sup>2+</sup> transporting 1             |
| CECR2     | CECR2, histone acetyl-lysine reader                                  |
| DBNL      | drebrin like                                                         |
| HIPK2     | homeodomain interacting protein kinase 2                             |
| CARD10    | caspase recruitment domain family member 10                          |
| MDFIC     | MyoD family inhibitor domain containing                              |
| RHOD      | ras homolog family member D                                          |
| MINK1     | misshapen like kinase 1                                              |
| IL20      | interleukin 20                                                       |
| NDUFA13   | NADH:ubiquinone oxidoreductase subunit A13                           |
| SHISA5    | shisa family member 5                                                |
| GMIP      | GEM interacting protein                                              |
| TAOK3     | TAO kinase 3                                                         |
| UBR5      | ubiquitin protein ligase E3 component n-recognin 5                   |
| CXXC5     | CXXC finger protein 5                                                |
| MBIP      | MAP3K12 binding inhibitory protein 1                                 |
| STYXL1    | serine/threonine/tyrosine interacting-like 1                         |
| NLK       | nemo like kinase                                                     |
| ZAK       | sterile alpha motif and leucine zipper containing kinase AZK         |
| CYCS      | cytochrome c, somatic                                                |
| TREM1     | triggering receptor expressed on myeloid cells 1                     |
| ZDHHC13   | zinc finger DHHC-type containing 13                                  |
| NDFIP2    | Nedd4 family interacting protein 2                                   |
| ARHGEF10L | Rho guanine nucleotide exchange factor 10 like                       |
| CDC42BPG  | CDC42 binding protein kinase gamma                                   |
| FGD6      | FYVE, RhoGEF and PH domain containing 6                              |
| PAG1      | phosphoprotein membrane anchor with glycosphingolipid microdomains 1 |
| PARD3     | par-3 family cell polarity regulator                                 |

|                                         |                                                              |
|-----------------------------------------|--------------------------------------------------------------|
| LTB4R2                                  | leukotriene B4 receptor 2                                    |
| DUSP22                                  | dual specificity phosphatase 22                              |
| OTUD7B                                  | OTU deubiquitinase 7B                                        |
| SLC44A2                                 | solute carrier family 44 member 2                            |
| PLEKHG5                                 | pleckstrin homology and RhoGEF domain containing G5          |
| CALCOCO1                                | calcium binding and coiled-coil domain 1                     |
| NLRC4                                   | NLR family, CARD domain containing 4                         |
| RRAGC                                   | Ras related GTP binding C                                    |
| NOD2                                    | nucleotide binding oligomerization domain containing 2       |
| CARD9                                   | caspase recruitment domain family member 9                   |
| ARAP3                                   | ArfGAP with RhoGAP domain, ankyrin repeat and PH domain 3    |
| CLEC7A                                  | C-type lectin domain family 7 member A                       |
| PINK1                                   | PTEN induced putative kinase 1                               |
| WNK1                                    | WNK lysine deficient protein kinase 1                        |
| WNK2                                    | WNK lysine deficient protein kinase 2                        |
| DDX54                                   | DEAD-box helicase 54                                         |
| ADIPOR2                                 | adiponectin receptor 2                                       |
| NEK11                                   | NIMA related kinase 11                                       |
| VOPP1                                   | vesicular, overexpressed in cancer, prosurvival protein 1    |
| CCM2                                    | CCM2 scaffolding protein                                     |
| SLA2                                    | Src-like-adaptor 2                                           |
| TRAF7                                   | TNF receptor associated factor 7                             |
| BRSK1                                   | BR serine/threonine kinase 1                                 |
| KIAA1804                                | mixed lineage kinase 4                                       |
| DERL3                                   | derlin 3                                                     |
| NLRP12                                  | NLR family, pyrin domain containing 12                       |
| IL22RA2                                 | interleukin 22 receptor subunit alpha 2                      |
| CLNK                                    | cytokine dependent hematopoietic cell linker                 |
| ARAP1                                   | ArfGAP with RhoGAP domain, ankyrin repeat and PH domain 1    |
| FGD4                                    | FYVE, RhoGEF and PH domain containing 4                      |
| EDARADD                                 | EDAR-associated death domain                                 |
| IL31RA                                  | interleukin 31 receptor A                                    |
| IRAK1BP1                                | interleukin 1 receptor associated kinase 1 binding protein 1 |
| ABRA                                    | actin binding Rho activating protein                         |
| MIB2                                    | mindbomb E3 ubiquitin protein ligase 2                       |
| SIK1                                    | salt inducible kinase 1                                      |
| NFAM1                                   | NFAT activating protein with ITAM motif 1                    |
| ROPN1B                                  | rhopilin associated tail protein 1B                          |
| FGD5                                    | FYVE, RhoGEF and PH domain containing 5                      |
| SPRED1                                  | sprouty related EVH1 domain containing 1                     |
| NLRC3                                   | NLR family, CARD domain containing 3                         |
| PIKFYVE                                 | phosphoinositide kinase, FYVE-type zinc finger containing    |
| SPRED2                                  | sprouty related EVH1 domain containing 2                     |
| ARHGAP27                                | Rho GTPase activating protein 27                             |
| FGD2                                    | FYVE, RhoGEF and PH domain containing 2                      |
| EPGN                                    | epithelial mitogen                                           |
| CRIPAK                                  | cysteine rich PAK1 inhibitor                                 |
| <b>Regulation of cell proliferation</b> |                                                              |
| <b>Gene Symbol</b>                      | <b>Name Gene</b>                                             |
| ACVRL1                                  | activin A receptor like type 1                               |
| AIF1                                    | allograft inflammatory factor 1                              |
| ALOX15B                                 | arachidonate 15-lipoxygenase, type B                         |
| BRCA1                                   | breast cancer 1                                              |
| BRCA2                                   | breast cancer 2                                              |
| BTC                                     | betacellulin                                                 |
| CAPN1                                   | calpain 1                                                    |
| CAPNS1                                  | calpain small subunit 1                                      |
| RUNX3                                   | runt related transcription factor 3                          |



|         |                                                           |
|---------|-----------------------------------------------------------|
| CCKBR   | cholecystokinin B receptor                                |
| CD3E    | CD3e molecule                                             |
| CD28    | CD28 molecule                                             |
| TNFRSF8 | tumor necrosis factor receptor superfamily member 8       |
| CD47    | CD47 molecule                                             |
| CD81    | CD81 molecule                                             |
| CDC25B  | cell division cycle 25B                                   |
| CDK6    | cyclin-dependent kinase 6                                 |
| CDKN2C  | cyclin-dependent kinase inhibitor 2C                      |
| CDKN3   | cyclin-dependent kinase inhibitor 3                       |
| CHRM1   | cholinergic receptor muscarinic 1                         |
| CTBP1   | C-terminal binding protein 1                              |
| CTBP2   | C-terminal binding protein 2                              |
| CTF1    | cardiotrophin 1                                           |
| DDX11   | DEAD/H-box helicase 11                                    |
| EGFR    | epidermal growth factor receptor                          |
| ERBB2   | erb-b2 receptor tyrosine kinase 2                         |
| ETS1    | ETS proto-oncogene 1, transcription factor                |
| FABP6   | fatty acid binding protein 6                              |
| FLT1    | fms related tyrosine kinase 1                             |
| FLT4    | fms related tyrosine kinase 4                             |
| FRK     | fyn related Src family tyrosine kinase                    |
| GAS8    | growth arrest specific 8                                  |
| GML     | glycosylphosphatidylinositol anchored molecule like       |
| HCLS1   | hematopoietic cell-specific Lyn substrate 1               |
| HOXC10  | homeobox C10                                              |
| IGF1R   | insulin like growth factor 1 receptor                     |
| IL1B    | interleukin 1 beta                                        |
| IL6     | interleukin 6                                             |
| CXCR2   | C-X-C motif chemokine receptor 2                          |
| IL12RB2 | interleukin 12 receptor subunit beta 2                    |
| IL18    | interleukin 18                                            |
| JAG2    | jagged 2                                                  |
| KRT4    | keratin 4                                                 |
| LAMC1   | laminin subunit gamma 1                                   |
| LRP5    | LDL receptor related protein 5                            |
| LYN     | LYN proto-oncogene, Src family tyrosine kinase            |
| MATK    | megakaryocyte-associated tyrosine kinase                  |
| MDM2    | MDM2 proto-oncogene                                       |
| MDM4    | MDM4, p53 regulator                                       |
| MNT     | MAX network transcriptional repressor                     |
| MST1R   | macrophage stimulating 1 receptor                         |
| NF1     | neurofibromin 1                                           |
| NF2     | neurofibromin 2 (merlin)                                  |
| NPM1    | nucleophosmin (nucleolar phosphoprotein B23, numatrin)    |
| OPRM1   | opioid receptor mu 1                                      |
| PAWR    | pro-apoptotic WT1 regulator                               |
| PDGFA   | platelet derived growth factor subunit A                  |
| PLG     | plasminogen                                               |
| POU3F2  | POU class 3 homeobox 2                                    |
| PTEN    | phosphatase and tensin homolog                            |
| QSOX1   | quiescin sulfhydryl oxidase 1                             |
| RARRES1 | retinoic acid receptor responder 1                        |
| S100A11 | S100 calcium binding protein A11                          |
| TSPAN31 | tetraspanin 31                                            |
| SFTPD   | surfactant protein D                                      |
| SLAMF1  | signaling lymphocytic activation molecule family member 1 |
| SSR1    | signal sequence receptor subunit 1                        |

|                             |                                                                             |
|-----------------------------|-----------------------------------------------------------------------------|
| SSTR4                       | somatostatin receptor 4                                                     |
| SSTR5                       | somatostatin receptor 5                                                     |
| TBX2                        | T-box 2                                                                     |
| TBX3                        | T-box 3                                                                     |
| TGFB11                      | transforming growth factor beta 1 induced transcript 1                      |
| TGFB2                       | transforming growth factor beta 2                                           |
| TGFBR2                      | transforming growth factor beta receptor 2                                  |
| KLF10                       | Kruppel-like factor 10                                                      |
| TM4SF4                      | transmembrane 4 L six family member 4                                       |
| TNFSF4                      | tumor necrosis factor superfamily member 4                                  |
| VEGFA                       | vascular endothelial growth factor A                                        |
| VHL                         | von Hippel-Lindau tumor suppressor                                          |
| VIPR1                       | vasoactive intestinal peptide receptor 1                                    |
| BTG2                        | BTG family member 2                                                         |
| SCG2                        | secretogranin II                                                            |
| LST1                        | leukocyte specific transcript 1                                             |
| NCK2                        | NCK adaptor protein 2                                                       |
| CUL4A                       | cullin 4A                                                                   |
| CUL3                        | cullin 3                                                                    |
| CUL2                        | cullin 2                                                                    |
| CUL1                        | cullin 1                                                                    |
| IFITM1                      | interferon induced transmembrane protein 1                                  |
| FGF18                       | fibroblast growth factor 18                                                 |
| NRP1                        | neuropilin 1                                                                |
| HGS                         | hepatocyte growth factor-regulated tyrosine kinase substrate                |
| DLG5                        | discs large homolog 5                                                       |
| S1PR2                       | sphingosine-1-phosphate receptor 2                                          |
| KLF4                        | Kruppel-like factor 4 (gut)                                                 |
| TP53I11                     | tumor protein p53 inducible protein 11                                      |
| FGFBP1                      | fibroblast growth factor binding protein 1                                  |
| NAMPT                       | nicotinamide phosphoribosyltransferase                                      |
| TOB1                        | transducer of ERBB2, 1                                                      |
| TCIRG1                      | T-cell immune regulator 1, ATPase H <sup>+</sup> transporting V0 subunit a3 |
| GPNMB                       | glycoprotein nmb                                                            |
| MXD4                        | MAX dimerization protein 4                                                  |
| ADAMTS8                     | ADAM metalloproteinase with thrombospondin type 1 motif 8                   |
| MYO16                       | myosin XVI                                                                  |
| ICOSLG                      | inducible T-cell co-stimulator ligand                                       |
| RBFox2                      | RNA binding protein, fox-1 homolog 2                                        |
| GNL3                        | G protein nucleolar 3                                                       |
| UTP20                       | UTP20, small subunit processome component                                   |
| ING4                        | inhibitor of growth family member 4                                         |
| ATP8A2                      | ATPase phospholipid transporting 8A2                                        |
| AGGF1                       | angiogenic factor with G-patch and FHA domains 1                            |
| MARK4                       | microtubule affinity regulating kinase 4                                    |
| IL21                        | interleukin 21                                                              |
| CD276                       | CD276 molecule                                                              |
| COL18A1                     | collagen type XVIII alpha 1                                                 |
| ING5                        | inhibitor of growth family member 5                                         |
| SCIN                        | scinderin                                                                   |
| IL31RA                      | interleukin 31 receptor A                                                   |
| EPGN                        | epithelial mitogen                                                          |
| LAMA1                       | laminin subunit alpha 1                                                     |
| ENPP7                       | ectonucleotide pyrophosphatase/phosphodiesterase 7                          |
| <b>Ectoderm development</b> |                                                                             |
| <b>Gene Symbol</b>          | <b>Name Gene</b>                                                            |
| ALOX12B                     | arachidonate 12-lipoxygenase, 12R type                                      |
| ATP2A2                      | ATPase sarcoplasmic/endoplasmic reticulum Ca <sup>2+</sup> transporting 2   |

|                               |                                                          |
|-------------------------------|----------------------------------------------------------|
| BTD                           | biotinidase                                              |
| COL1A1                        | collagen type I alpha 1                                  |
| COL5A2                        | collagen type V alpha 2                                  |
| COL7A1                        | collagen type VII alpha 1                                |
| CTGF                          | connective tissue growth factor                          |
| DHCR24                        | 24-dehydrocholesterol reductase                          |
| DSP                           | desmoplakin                                              |
| EMP1                          | epithelial membrane protein 1                            |
| STX2                          | syntaxin 2                                               |
| ERCC3                         | excision repair cross-complementation group 3            |
| EVPL                          | envoplakin                                               |
| GJB5                          | gap junction protein beta 5                              |
| KRT1                          | keratin 1                                                |
| KRT5                          | keratin 5                                                |
| KRT6B                         | keratin 6B                                               |
| KRT13                         | keratin 13                                               |
| KRT15                         | keratin 15                                               |
| KRT32                         | keratin 32                                               |
| LAMA3                         | laminin subunit alpha 3                                  |
| LAMB3                         | laminin subunit beta 3                                   |
| LAMC2                         | laminin subunit gamma 2                                  |
| PROX1                         | prospero homeobox 1                                      |
| SPRR1A                        | small proline rich protein 1A                            |
| TFAP2A                        | transcription factor AP-2 alpha                          |
| TGFB2                         | transforming growth factor beta 2                        |
| TGM3                          | transglutaminase 3                                       |
| UGCG                          | UDP-glucose ceramide glucosyltransferase                 |
| FOXN1                         | forkhead box N1                                          |
| SCEL                          | sciellin                                                 |
| TGM5                          | transglutaminase 5                                       |
| FST                           | follistatin                                              |
| VAX2                          | ventral anterior homeobox 2                              |
| KLK5                          | kallikrein related peptidase 5                           |
| POU2F3                        | POU class 2 homeobox 3                                   |
| ATP2C1                        | ATPase secretory pathway Ca <sup>2+</sup> transporting 1 |
| IL20                          | interleukin 20                                           |
| ZBTB7B                        | zinc finger and BTB domain containing 7B                 |
| CALML5                        | calmodulin like 5                                        |
| SMURF1                        | SMAD specific E3 ubiquitin protein ligase 1              |
| <b>Neuron Differentiation</b> |                                                          |
| <b>Gene Symbol</b>            | <b>Name Gene</b>                                         |
| ATP2B2                        | ATPase plasma membrane Ca <sup>2+</sup> transporting 2   |
| DTX1                          | deltex 1                                                 |
| GDNF                          | glial cell derived neurotrophic factor                   |
| GLI2                          | GLI family zinc finger 2                                 |
| LAMB1                         | laminin subunit beta 1                                   |
| LMX1B                         | LIM homeobox transcription factor 1 beta                 |
| MAPT                          | microtubule associated protein tau                       |
| NRCAM                         | neuronal cell adhesion molecule                          |
| PAX2                          | paired box 2                                             |
| PPT1                          | palmitoyl-protein thioesterase 1                         |
| ROBO1                         | roundabout guidance receptor 1                           |
| ROBO2                         | roundabout guidance receptor 2                           |
| RTN1                          | reticulon 1                                              |
| S100B                         | S100 calcium binding protein B                           |
| SHH                           | sonic hedgehog                                           |
| TGFB2                         | transforming growth factor beta 2                        |
| UBB                           | ubiquitin B                                              |

|         |                                                                              |
|---------|------------------------------------------------------------------------------|
| YWHAG   | tyrosine 3-monooxygenase/tryptophan 5-monooxygenase activation protein gamma |
| SEMA3B  | semaphorin 3B                                                                |
| LST1    | leukocyte specific transcript 1                                              |
| NRP2    | neuropilin 2                                                                 |
| NRP1    | neuropilin 1                                                                 |
| BRSK2   | BR serine/threonine kinase 2                                                 |
| SLIT2   | slit guidance ligand 2                                                       |
| NRXN3   | neurexin 3                                                                   |
| FEZ2    | fasciculation and elongation protein zeta 2                                  |
| SPON2   | spondin 2                                                                    |
| BAIAP2  | BAI1 associated protein 2                                                    |
| SEMA4F  | semaphorin 4F                                                                |
| POU6F2  | POU class 6 homeobox 2                                                       |
| NTNG1   | netrin G1                                                                    |
| NLGN1   | neuroligin 1                                                                 |
| CYFIP1  | cytoplasmic FMR1 interacting protein 1                                       |
| PARD3   | par-3 family cell polarity regulator                                         |
| RTN4    | reticulon 4                                                                  |
| PARD6B  | par-6 family cell polarity regulator beta                                    |
| RTN4RL1 | reticulon 4 receptor like 1                                                  |
| MDGA2   | MAM domain containing glycosylphosphatidylinositol anchor 2                  |
| MDGA1   | MAM domain containing glycosylphosphatidylinositol anchor 1                  |
| RTN4RL2 | reticulon 4 receptor-like 2                                                  |
| VWC2    | von Willebrand factor C domain containing 2                                  |
| AGRN    | agrin                                                                        |

### Neurogenesis

| Gene Symbol | Name Gene                                                                    |
|-------------|------------------------------------------------------------------------------|
| ATP2B2      | ATPase plasma membrane Ca <sup>2+</sup> transporting 2                       |
| AZU1        | azurocidin 1                                                                 |
| CDK6        | cyclin-dependent kinase 6                                                    |
| CLN5        | ceroid-lipofuscinosis, neuronal 5                                            |
| DTX1        | deltex 1                                                                     |
| GDNF        | glial cell derived neurotrophic factor                                       |
| GLI2        | GLI family zinc finger 2                                                     |
| LAMB1       | laminin subunit beta 1                                                       |
| LMX1B       | LIM homeobox transcription factor 1 beta                                     |
| MAPT        | microtubule associated protein tau                                           |
| NF1         | neurofibromin 1                                                              |
| NF2         | neurofibromin 2 (merlin)                                                     |
| NRCAM       | neuronal cell adhesion molecule                                              |
| PAX2        | paired box 2                                                                 |
| PPT1        | palmitoyl-protein thioesterase 1                                             |
| ROBO1       | roundabout guidance receptor 1                                               |
| ROBO2       | roundabout guidance receptor 2                                               |
| RTN1        | reticulon 1                                                                  |
| S100B       | S100 calcium binding protein B                                               |
| SHH         | sonic hedgehog                                                               |
| SOD1        | superoxide dismutase 1, soluble                                              |
| TGFB2       | transforming growth factor beta 2                                            |
| UBB         | ubiquitin B                                                                  |
| YWHAG       | tyrosine 3-monooxygenase/tryptophan 5-monooxygenase activation protein gamma |
| SEMA3B      | semaphorin 3B                                                                |
| LST1        | leukocyte specific transcript 1                                              |
| NRP2        | neuropilin 2                                                                 |
| NRP1        | neuropilin 1                                                                 |
| EIF2B3      | eukaryotic translation initiation factor 2B subunit gamma                    |

|                              |                                                                              |
|------------------------------|------------------------------------------------------------------------------|
| BRSK2                        | BR serine/threonine kinase 2                                                 |
| SLIT2                        | slit guidance ligand 2                                                       |
| NRXN3                        | neurexin 3                                                                   |
| FEZ2                         | fasciculation and elongation protein zeta 2                                  |
| SPON2                        | spondin 2                                                                    |
| BAIAP2                       | BAI1 associated protein 2                                                    |
| SEMA4F                       | ssemaphorin 4F                                                               |
| CIT                          | citron rho-interacting serine/threonine kinase                               |
| POU6F2                       | POU class 6 homeobox 2                                                       |
| NTNG1                        | netrin G1                                                                    |
| NLGN1                        | neuroligin 1                                                                 |
| CYFIP1                       | cytoplasmic FMR1 interacting protein 1                                       |
| RACGAP1                      | Rac GTPase activating protein 1                                              |
| PARD3                        | par-3 family cell polarity regulator                                         |
| RTN4                         | reticulon 4                                                                  |
| PARD6B                       | par-6 family cell polarity regulator beta                                    |
| RTN4RL1                      | reticulon 4 receptor like 1                                                  |
| MDGA2                        | MAM domain containing glycosylphosphatidylinositol anchor 2                  |
| MDGA1                        | MAM domain containing glycosylphosphatidylinositol anchor 1                  |
| RTN4RL2                      | reticulon 4 receptor-like 2                                                  |
| VWC2                         | von Willebrand factor C domain containing 2                                  |
| AGRN                         | agrin                                                                        |
| <b>Generation of neurons</b> |                                                                              |
| <b>Gene Symbol</b>           | <b>Name Gene</b>                                                             |
| ATP2B2                       | ATPase plasma membrane Ca <sup>2+</sup> transporting 2                       |
| DTX1                         | deltex 1                                                                     |
| GDNF                         | glial cell derived neurotrophic factor                                       |
| GLI2                         | GLI family zinc finger 2                                                     |
| LAMB1                        | laminin subunit beta 1                                                       |
| LMX1B                        | LIM homeobox transcription factor 1 beta                                     |
| MAPT                         | microtubule associated protein tau                                           |
| NF1                          | neurofibromin 1                                                              |
| NRCAM                        | neuronal cell adhesion molecule                                              |
| PAX2                         | paired box 2                                                                 |
| PPT1                         | palmitoyl-protein thioesterase 1                                             |
| ROBO1                        | roundabout guidance receptor 1                                               |
| ROBO2                        | roundabout guidance receptor 2                                               |
| RTN1                         | reticulon 1                                                                  |
| S100B                        | S100 calcium binding protein B                                               |
| SHH                          | sonic hedgehog                                                               |
| TGFB2                        | transforming growth factor beta 2                                            |
| UBB                          | ubiquitin B                                                                  |
| YWHAG                        | tyrosine 3-monooxygenase/tryptophan 5-monooxygenase activation protein gamma |
| SEMA3B                       | semaphorin 3B                                                                |
| LST1                         | leukocyte specific transcript 1                                              |
| NRP2                         | neuropilin 2                                                                 |
| NRP1                         | neuropilin 1                                                                 |
| BRSK2                        | BR serine/threonine kinase 2                                                 |
| SLIT2                        | slit guidance ligand 2                                                       |
| NRXN3                        | neurexin 3                                                                   |
| FEZ2                         | fasciculation and elongation protein zeta 2                                  |
| SPON2                        | spondin 2                                                                    |
| BAIAP2                       | BAI1 associated protein 2                                                    |
| SEMA4F                       | ssemaphorin 4F                                                               |
| CIT                          | citron rho-interacting serine/threonine kinase                               |
| POU6F2                       | POU class 6 homeobox 2                                                       |
| NTNG1                        | netrin G1                                                                    |

|                                   |                                                               |
|-----------------------------------|---------------------------------------------------------------|
| NLGN1                             | neuroligin 1                                                  |
| CYFIP1                            | cytoplasmic FMR1 interacting protein 1                        |
| RACGAP1                           | Rac GTPase activating protein 1                               |
| PARD3                             | par-3 family cell polarity regulator                          |
| RTN4                              | reticulon 4                                                   |
| PARD6B                            | par-6 family cell polarity regulator beta                     |
| RTN4RL1                           | reticulon 4 receptor like 1                                   |
| MDGA2                             | MAM domain containing glycosylphosphatidylinositol anchor 2   |
| MDGA1                             | MAM domain containing glycosylphosphatidylinositol anchor 1   |
| RTN4RL2                           | reticulon 4 receptor-like 2                                   |
| VWC2                              | von Willebrand factor C domain containing 2                   |
| AGRN                              | agrin                                                         |
| <b>Nervous system development</b> |                                                               |
| <b>Gene Symbol</b>                | <b>Name Gene</b>                                              |
| ALK                               | anaplastic lymphoma receptor tyrosine kinase                  |
| APBA1                             | amyloid beta precursor protein binding family A member 1      |
| APBA2                             | amyloid beta precursor protein binding family A member 2      |
| ATP2B2                            | ATPase plasma membrane Ca <sup>2+</sup> transporting 2        |
| AZU1                              | azurocidin 1                                                  |
| BTD                               | biotinidase                                                   |
| MPPED2                            | metallophosphoesterase domain containing 2                    |
| CBLN1                             | cerebellin 1 precursor                                        |
| CD9                               | CD9 molecule                                                  |
| CDK6                              | cyclin-dependent kinase 6                                     |
| CHRM1                             | cholinergic receptor muscarinic 1                             |
| CHRM2                             | cholinergic receptor muscarinic 2                             |
| CHRM3                             | cholinergic receptor muscarinic 3                             |
| CHRNA4                            | cholinergic receptor nicotinic alpha 4 subunit                |
| CLN5                              | ceroid-lipofuscinosis, neuronal 5                             |
| CNTFR                             | ciliary neurotrophic factor receptor                          |
| CRMP1                             | collapsin response mediator protein 1                         |
| CTF1                              | cardiotrophin 1                                               |
| CTNS                              | cystinosis, lysosomal cystine transporter                     |
| DLG4                              | discs large homolog 4                                         |
| DLX2                              | distal-less homeobox 2                                        |
| DLX5                              | distal-less homeobox 5                                        |
| DPYSL2                            | dihydropyrimidinase like 2                                    |
| ATN1                              | atrophin 1                                                    |
| DSCAM                             | DS cell adhesion molecule                                     |
| RCAN1                             | regulator of calcineurin 1                                    |
| DTX1                              | deltex 1                                                      |
| DYRK1A                            | dual specificity tyrosine phosphorylation regulated kinase 1A |
| EFNA5                             | ephrin A5                                                     |
| EP300                             | E1A binding protein p300                                      |
| EPHB2                             | EPH receptor B2                                               |
| FGF5                              | fibroblast growth factor 5                                    |
| FGF12                             | fibroblast growth factor 12                                   |
| FOXP1                             | forkhead box G1                                               |
| GDNF                              | glial cell derived neurotrophic factor                        |
| GFRA3                             | GDNF family receptor alpha 3                                  |
| GLI2                              | GLI family zinc finger 2                                      |
| GSS                               | glutathione synthetase                                        |
| GSTP1                             | glutathione S-transferase pi 1                                |
| HES1                              | hes family bHLH transcription factor 1                        |
| JARID2                            | jumonji and AT-rich interaction domain containing 2           |
| KCNN3                             | potassium calcium-activated channel subfamily N member 3      |
| KCNQ2                             | potassium voltage-gated channel subfamily Q member 2          |
| LAMB1                             | laminin subunit beta 1                                        |

|         |                                                                              |
|---------|------------------------------------------------------------------------------|
| LMX1B   | LIM homeobox transcription factor 1 beta                                     |
| LY6H    | lymphocyte antigen 6 complex, locus H                                        |
| MAPT    | microtubule associated protein tau                                           |
| MBNL1   | muscleblind like splicing regulator 1                                        |
| MBP     | myelin basic protein                                                         |
| MEF2C   | myocyte enhancer factor 2C                                                   |
| MOG     | myelin oligodendrocyte glycoprotein                                          |
| NEUROG1 | neurogenin 1                                                                 |
| NF1     | neurofibromin 1                                                              |
| NF2     | neurofibromin 2 (merlin)                                                     |
| NHLH2   | nescient helix-loop-helix 2                                                  |
| NINJ1   | ninjurin 1                                                                   |
| NPAS2   | neuronal PAS domain protein 2                                                |
| NPTX1   | neuronal pentraxin 1                                                         |
| NRCAM   | neuronal cell adhesion molecule                                              |
| NRGN    | neurogranin                                                                  |
| NTF3    | neurotrophin 3                                                               |
| PARK2   | parkin RBR E3 ubiquitin protein ligase                                       |
| PAX2    | paired box 2                                                                 |
| PBX1    | PBX homeobox 1                                                               |
| PCDH1   | protocadherin 1                                                              |
| PPT1    | palmitoyl-protein thioesterase 1                                             |
| PSPN    | persephin                                                                    |
| PTEN    | phosphatase and tensin homolog                                               |
| PTS     | 6-pyruvoyltetrahydropterin synthase                                          |
| ROBO1   | roundabout guidance receptor 1                                               |
| ROBO2   | roundabout guidance receptor 2                                               |
| RTN1    | reticulon 1                                                                  |
| S100B   | S100 calcium binding protein B                                               |
| SCN8A   | sodium voltage-gated channel alpha subunit 8                                 |
| SH3GL3  | SH3 domain containing GRB2 like endophilin A3                                |
| SHH     | sonic hedgehog                                                               |
| SHOX2   | short stature homeobox 2                                                     |
| SIM1    | single-minded family bHLH transcription factor 1                             |
| SIM2    | single-minded family bHLH transcription factor 2                             |
| SIX3    | SIX homeobox 3                                                               |
| SLIT3   | slit guidance ligand 3                                                       |
| SNCA    | synuclein alpha                                                              |
| SOD1    | superoxide dismutase 1, soluble                                              |
| SOX11   | SRY-box 11                                                                   |
| SPG7    | SPG7, paraplegin matrix AAA peptidase subunit                                |
| SPOCK1  | sparc/osteonectin, cwcv and kazal-like domains proteoglycan (testican) 1     |
| STAT3   | signal transducer and activator of transcription 3                           |
| TFAP2B  | transcription factor AP-2 beta                                               |
| TGFB2   | transforming growth factor beta 2                                            |
| NR2E1   | nuclear receptor subfamily 2 group E member 1                                |
| NR2C2   | nuclear receptor subfamily 2 group C member 2                                |
| UBB     | ubiquitin B                                                                  |
| UBE3A   | ubiquitin protein ligase E3A                                                 |
| UGT8    | UDP glycosyltransferase 8                                                    |
| VEGFA   | vascular endothelial growth factor A                                         |
| YWHAG   | tyrosine 3-monooxygenase/tryptophan 5-monooxygenase activation protein gamma |
| ZIC1    | Zic family member 1                                                          |
| ZBTB16  | zinc finger and BTB domain containing 16                                     |
| SEMA3B  | semaphorin 3B                                                                |
| LST1    | leukocyte specific transcript 1                                              |
| ST8SIA2 | ST8 alpha-N-acetyl-neuraminide alpha-2,8-sialyltransferase 2                 |

|         |                                                                   |
|---------|-------------------------------------------------------------------|
| DGCR14  | DiGeorge syndrome critical region gene 14                         |
| FZD9    | frizzled class receptor 9                                         |
| SOX14   | SRY-box 14                                                        |
| ENC1    | ectodermal-neural cortex 1                                        |
| ADAM23  | ADAM metallopeptidase domain 23                                   |
| FGF17   | fibroblast growth factor 17                                       |
| NRP2    | neuropilin 2                                                      |
| NRP1    | neuropilin 1                                                      |
| EIF2B3  | eukaryotic translation initiation factor 2B subunit gamma         |
| KALRN   | kalirin, RhoGEF kinase                                            |
| BRSK2   | BR serine/threonine kinase 2                                      |
| DCLK1   | doublecortin like kinase 1                                        |
| LGI1    | leucine-rich, glioma inactivated 1                                |
| NUMBL   | NUMB like, endocytic adaptor protein                              |
| SLIT2   | slit guidance ligand 2                                            |
| CPNE6   | copine 6                                                          |
| NRXN3   | neurexin 3                                                        |
| CELSR1  | cadherin EGF LAG seven-pass G-type receptor 1                     |
| FEZ2    | fasciculation and elongation protein zeta 2                       |
| ECE2    | endothelin converting enzyme 2                                    |
| HDAC4   | histone deacetylase 4                                             |
| FGF19   | fibroblast growth factor 19                                       |
| SPON2   | spondin 2                                                         |
| OLFM1   | olfactomedin 1                                                    |
| BAIAP2  | BAI1 associated protein 2                                         |
| SEMA4F  | ssemaphorin 4F                                                    |
| AVIL    | advillin                                                          |
| TBR1    | T-box, brain 1                                                    |
| CYP46A1 | cytochrome P450 family 46 subfamily A member 1                    |
| CIT     | citron rho-interacting serine/threonine kinase                    |
| POU6F2  | POU class 6 homeobox 2                                            |
| NTNG1   | netrin G1                                                         |
| NLGN1   | neuroligin 1                                                      |
| MYO16   | myosin XVI                                                        |
| CYFIP1  | cytoplasmic FMR1 interacting protein 1                            |
| ATXN10  | ataxin 10                                                         |
| PHGDH   | phosphoglycerate dehydrogenase                                    |
| LHX6    | LIM homeobox 6                                                    |
| HEYL    | hes related family bHLH transcription factor with YRPW motif-like |
| MYLIP   | myosin regulatory light chain interacting protein                 |
| RACGAP1 | Rac GTPase activating protein 1                                   |
| TMOD2   | tropomodulin 2                                                    |
| SOX8    | SRY-box 8                                                         |
| STMN3   | stathmin 3                                                        |
| UTP11   | UTP11, small subunit processome component homolog (S. cerevisiae) |
| CRIM1   | cysteine rich transmembrane BMP regulator 1 (chordin-like)        |
| HPCAL4  | hippocalcin like 4                                                |
| HDAC7   | histone deacetylase 7                                             |
| SNTG2   | syntrophin gamma 2                                                |
| PCDH18  | protocadherin 18                                                  |
| MAML3   | mastermind like transcriptional coactivator 3                     |
| PCDHA1  | protocadherin alpha 1                                             |
| PARD3   | par-3 family cell polarity regulator                              |
| RTN4    | reticulon 4                                                       |
| VANGL2  | VANGL planar cell polarity protein 2                              |
| DSCAML1 | DS cell adhesion molecule like 1                                  |
| MARK4   | microtubule affinity regulating kinase 4                          |
| PARD6B  | par-6 family cell polarity regulator beta                         |



|                                           |                                                             |
|-------------------------------------------|-------------------------------------------------------------|
| FOXP2                                     | forkhead box P2                                             |
| NRSN1                                     | neurensin 1                                                 |
| RTN4RL1                                   | reticulon 4 receptor like 1                                 |
| MDGA2                                     | MAM domain containing glycosylphosphatidylinositol anchor 2 |
| MDGA1                                     | MAM domain containing glycosylphosphatidylinositol anchor 1 |
| RTN4RL2                                   | reticulon 4 receptor-like 2                                 |
| VWC2                                      | von Willebrand factor C domain containing 2                 |
| AGRN                                      | agrin                                                       |
| <b>Central nervous system development</b> |                                                             |
| <b>Gene Symbol</b>                        | <b>Name Gene</b>                                            |
| ALK                                       | anaplastic lymphoma receptor tyrosine kinase                |
| BTD                                       | biotinidase                                                 |
| CLN5                                      | ceroid-lipofuscinosis, neuronal 5                           |
| CTNS                                      | cystinosis, lysosomal cystine transporter                   |
| DLX2                                      | distal-less homeobox 2                                      |
| ATN1                                      | atrophin 1                                                  |
| RCAN1                                     | regulator of calcineurin 1                                  |
| FOXP1                                     | forkhead box G1                                             |
| GLI2                                      | GLI family zinc finger 2                                    |
| GSTP1                                     | glutathione S-transferase pi 1                              |
| JARID2                                    | jumonji and AT-rich interaction domain containing 2         |
| MBP                                       | myelin basic protein                                        |
| MOG                                       | myelin oligodendrocyte glycoprotein                         |
| NF1                                       | neurofibromin 1                                             |
| NHLH2                                     | nescient helix-loop-helix 2                                 |
| NPAS2                                     | neuronal PAS domain protein 2                               |
| NPTX1                                     | neuronal pentraxin 1                                        |
| PARK2                                     | parkin RBR E3 ubiquitin protein ligase                      |
| PBX1                                      | PBX homeobox 1                                              |
| PPT1                                      | palmitoyl-protein thioesterase 1                            |
| PSPN                                      | persephin                                                   |
| PTEN                                      | phosphatase and tensin homolog                              |
| PTS                                       | 6-pyruvoyltetrahydropterin synthase                         |
| SH3GL3                                    | SH3 domain containing GRB2 like endophilin A3               |
| SHH                                       | sonic hedgehog                                              |
| SIX3                                      | SIX homeobox 3                                              |
| SLIT3                                     | slit guidance ligand 3                                      |
| SNCA                                      | synuclein alpha                                             |
| UBE3A                                     | ubiquitin protein ligase E3A                                |
| ZBTB16                                    | zinc finger and BTB domain containing 16                    |
| ADAM23                                    | ADAM metalloproteinase domain 23                            |
| EIF2B3                                    | eukaryotic translation initiation factor 2B subunit gamma   |
| DCLK1                                     | doublecortin like kinase 1                                  |
| CELSR1                                    | cadherin EGF LAG seven-pass G-type receptor 1               |
| ECE2                                      | endothelin converting enzyme 2                              |
| TBR1                                      | T-box, brain 1                                              |
| POU6F2                                    | POU class 6 homeobox 2                                      |
| MYO16                                     | myosin XVI                                                  |
| PHGDH                                     | phosphoglycerate dehydrogenase                              |
| LHX6                                      | LIM homeobox 6                                              |
| SOX8                                      | SRY-box 8                                                   |
| HPCAL4                                    | hippocalcin like 4                                          |
| SNTG2                                     | syntrophin gamma 2                                          |
| PCDH18                                    | protocadherin 18                                            |
| DSCAML1                                   | DS cell adhesion molecule like 1                            |
| MDGA2                                     | MAM domain containing glycosylphosphatidylinositol anchor 2 |
| MDGA1                                     | MAM domain containing glycosylphosphatidylinositol anchor 1 |

**Table S2 - Gene collection of Incident group**

| <b>Table S2 - Gene collection of Incident group</b> |                                                        |
|-----------------------------------------------------|--------------------------------------------------------|
| <b>Biological processes</b>                         |                                                        |
| <b>System development</b>                           |                                                        |
| <b>Gene Symbol</b>                                  | <b>Name Gene</b>                                       |
| ACTA1                                               | actin, alpha 1, skeletal muscle                        |
| ACVRL1                                              | activin A receptor like type 1                         |
| AEBP1                                               | AE binding protein 1                                   |
| ALDH3A2                                             | aldehyde dehydrogenase 3 family member A2              |
| ALK                                                 | anaplastic lymphoma receptor tyrosine kinase           |
| ALOX12B                                             | arachidonate 12-lipoxygenase, 12R type                 |
| ANG                                                 | angiogenin                                             |
| APAF1                                               | apoptotic peptidase activating factor 1                |
| APLP1                                               | amyloid beta precursor like protein 1                  |
| ATP2B2                                              | ATPase plasma membrane Ca <sup>2+</sup> transporting 2 |
| ATP6V1B1                                            | ATPase H <sup>+</sup> transporting V1 subunit B1       |
| AZU1                                                | azurocidin 1                                           |
| BDNF                                                | brain-derived neurotrophic factor                      |
| BNC1                                                | basonuclin 1                                           |
| BMP1                                                | bone morphogenetic protein 1                           |
| BMP2                                                | bone morphogenetic protein 2                           |
| FOXL2                                               | forkhead box L2                                        |
| BTD                                                 | biotinidase                                            |
| MPPED2                                              | metallophosphoesterase domain containing 2             |
| CACNB2                                              | calcium voltage-gated channel auxiliary subunit beta 2 |
| CALCA                                               | calcitonin related polypeptide alpha                   |
| CANX                                                | calnexin                                               |
| CASR                                                | calcium sensing receptor                               |
| RUNX2                                               | runt related transcription factor 2                    |
| RUNX1                                               | runt related transcription factor 1                    |
| CBLN1                                               | cerebellin 1 precursor                                 |
| CDH13                                               | cadherin 13                                            |
| CDK6                                                | cyclin-dependent kinase 6                              |
| CDX1                                                | caudal type homeobox 1                                 |
| CHRM1                                               | cholinergic receptor muscarinic 1                      |
| CHRM2                                               | cholinergic receptor muscarinic 2                      |
| CHRM3                                               | cholinergic receptor muscarinic 3                      |
| CHRNA1                                              | cholinergic receptor nicotinic alpha 1 subunit         |
| CHRNA4                                              | cholinergic receptor nicotinic alpha 4 subunit         |
| CMKLR1                                              | chemerin chemokine-like receptor 1                     |
| CNTFR                                               | ciliary neurotrophic factor receptor                   |
| COL1A1                                              | collagen type I alpha 1                                |
| COL1A2                                              | collagen type I alpha 2                                |
| COL4A2                                              | collagen type IV alpha 2                               |
| COL5A2                                              | collagen type V alpha 2                                |
| COL6A3                                              | collagen type VI alpha 3                               |
| COL7A1                                              | collagen type VII alpha 1                              |
| COL9A1                                              | collagen type IX alpha 1                               |
| COL9A2                                              | collagen type IX alpha 2                               |
| COL12A1                                             | collagen type XII alpha 1                              |
| COL13A1                                             | collagen type XIII alpha 1                             |
| CTNS                                                | cystinosin, lysosomal cystine transporter              |
| DCN                                                 | decorin                                                |
| DLX2                                                | distal-less homeobox 2                                 |
| DLX5                                                | distal-less homeobox 5                                 |
| DPYSL2                                              | dihydropyrimidinase like 2                             |

|        |                                                               |
|--------|---------------------------------------------------------------|
| DPYSL3 | dihydropyrimidinase like 3                                    |
| DSCAM  | DS cell adhesion molecule                                     |
| DSP    | desmoplakin                                                   |
| DTX1   | deltex 1                                                      |
| DVL3   | dishevelled segment polarity protein 3                        |
| DYRK1A | dual specificity tyrosine phosphorylation regulated kinase 1A |
| EFNA5  | ephrin A5                                                     |
| EGF    | epidermal growth factor                                       |
| EGR2   | early growth response 2                                       |
| EGR3   | early growth response 3                                       |
| ELN    | elastin                                                       |
| EMP1   | epithelial membrane protein 1                                 |
| EN1    | engrailed homeobox 1                                          |
| EPHB1  | EPH receptor B1                                               |
| EPHB2  | EPH receptor B2                                               |
| STX2   | syntaxin 2                                                    |
| CLN8   | ceroid-lipofuscinosis, neuronal 8                             |
| ERBB2  | erb-b2 receptor tyrosine kinase 2                             |
| ERCC2  | excision repair cross-complementation group 2                 |
| ERCC3  | excision repair cross-complementation group 3                 |
| ETS1   | ETS proto-oncogene 1, transcription factor                    |
| EVC    | EvC ciliary complex subunit 1                                 |
| EVPL   | envoplakin                                                    |
| EXT2   | exostosin glycosyltransferase 2                               |
| FBN1   | fibrillin 1                                                   |
| FGF12  | fibroblast growth factor 12                                   |
| FGFR3  | fibroblast growth factor receptor 3                           |
| FHL3   | four and a half LIM domains 3                                 |
| FOXG1  | forkhead box G1                                               |
| FOXC1  | forkhead box C1                                               |
| FOXC2  | forkhead box C2                                               |
| FOXE1  | forkhead box E1                                               |
| FOXO3  | forkhead box O3                                               |
| FLI1   | Fli-1 proto-oncogene, ETS transcription factor                |
| FSHR   | follicle stimulating hormone receptor                         |
| NR5A1  | nuclear receptor subfamily 5 group A member 1                 |
| GATA4  | GATA binding protein 4                                        |
| GATA6  | GATA binding protein 6                                        |
| GDNF   | glial cell derived neurotrophic factor                        |
| GFRA3  | GDNF family receptor alpha 3                                  |
| GJB5   | gap junction protein beta 5                                   |
| GLI2   | GLI family zinc finger 2                                      |
| CXCL1  | C-X-C motif chemokine ligand 1                                |
| HCLS1  | hematopoietic cell-specific Lyn substrate 1                   |
| HTT    | huntingtin                                                    |
| HOXA13 | homeobox A13                                                  |
| HOXD13 | homeobox D13                                                  |
| HRAS   | Harvey rat sarcoma viral oncogene homolog                     |
| HES1   | hes family bHLH transcription factor 1                        |
| IGFBP3 | insulin like growth factor binding protein 3                  |
| IGFBP4 | insulin like growth factor binding protein 4                  |
| IL7    | interleukin 7                                                 |
| PDX1   | pancreatic and duodenal homeobox 1                            |
| JAG2   | jagged 2                                                      |
| JAK2   | Janus kinase 2                                                |
| JARID2 | jumonji and AT-rich interaction domain containing 2           |
| KCNQ2  | potassium voltage-gated channel subfamily Q member 2          |
| KRT1   | keratin 1                                                     |

|           |                                                                     |
|-----------|---------------------------------------------------------------------|
| KRT6A     | keratin 6A                                                          |
| KRT10     | keratin 10                                                          |
| KRT15     | keratin 15                                                          |
| KRT32     | keratin 32                                                          |
| LAMA3     | laminin subunit alpha 3                                             |
| LAMB3     | laminin subunit beta 3                                              |
| LAMC1     | laminin subunit gamma 1                                             |
| LAMC2     | laminin subunit gamma 2                                             |
| LCK       | LCK proto-oncogene, Src family tyrosine kinase                      |
| LHX1      | LIM homeobox 1                                                      |
| LIG1      | DNA ligase 1                                                        |
| ABLIM1    | actin binding LIM protein 1                                         |
| LMX1B     | LIM homeobox transcription factor 1 beta                            |
| LRMP      | lymphoid restricted membrane protein                                |
| LRCH4     | leucine-rich repeats and calponin homology (CH) domain containing 4 |
| LSAMP     | limbic system-associated membrane protein                           |
| LY6H      | lymphocyte antigen 6 complex, locus H                               |
| MAL       | mal, T-cell differentiation protein                                 |
| MAPT      | microtubule associated protein tau                                  |
| MBNL1     | muscleblind like splicing regulator 1                               |
| MBP       | myelin basic protein                                                |
| MEA1      | male-enhanced antigen 1                                             |
| MEF2C     | myocyte enhancer factor 2C                                          |
| MEF2D     | myocyte enhancer factor 2D                                          |
| MEST      | mesoderm specific transcript                                        |
| MLF1      | myeloid leukemia factor 1                                           |
| MOG       | myelin oligodendrocyte glycoprotein                                 |
| MSX1      | msh homeobox 1                                                      |
| MSX2      | msh homeobox 2                                                      |
| MYBPC3    | myosin binding protein C, cardiac                                   |
| MYH7      | myosin, heavy chain 7, cardiac muscle, beta                         |
| MYH9      | myosin, heavy chain 9, non-muscle                                   |
| MYH11     | myosin, heavy chain 11, smooth muscle                               |
| MYOD1     | myogenic differentiation 1                                          |
| NAB2      | NGFI-A binding protein 2                                            |
| NCL       | nucleolin                                                           |
| NDUFV2    | NADH:ubiquinone oxidoreductase core subunit V2                      |
| NELL1     | neural EGFL like 1                                                  |
| NEUROG1   | neurogenin 1                                                        |
| NF1       | neurofibromin 1                                                     |
| NF2       | neurofibromin 2 (merlin)                                            |
| NHLH2     | nescient helix-loop-helix 2                                         |
| NINJ2     | ninjurin 2                                                          |
| NKX2-2    | NK2 homeobox 2                                                      |
| NKX6-1    | NK6 homeobox 1                                                      |
| NOTCH1    | notch 1                                                             |
| NOTCH4    | notch 4                                                             |
| NPAS2     | neuronal PAS domain protein 2                                       |
| NPR1      | natriuretic peptide receptor 1                                      |
| NPR3      | natriuretic peptide receptor 3                                      |
| NPTX1     | neuronal pentraxin 1                                                |
| NRCAM     | neuronal cell adhesion molecule                                     |
| NRDC      | nardilysin convertase                                               |
| NTF3      | neurotrophin 3                                                      |
| TNFRSF11B | tumor necrosis factor receptor superfamily member 11b               |
| PARK2     | parkin RBR E3 ubiquitin protein ligase                              |
| PAX2      | paired box 2                                                        |

|          |                                                                          |
|----------|--------------------------------------------------------------------------|
| PAX5     | paired box 5                                                             |
| PAX6     | paired box 6                                                             |
| PBX1     | PBX homeobox 1                                                           |
| PBX3     | PBX homeobox 3                                                           |
| PCDH1    | protocadherin 1                                                          |
| PCP4     | Purkinje cell protein 4                                                  |
| PF4      | platelet factor 4                                                        |
| SERPINI1 | serpin family I member 1                                                 |
| PITX2    | paired like homeodomain 2                                                |
| PLG      | plasminogen                                                              |
| POU3F3   | POU class 3 homeobox 3                                                   |
| POU4F2   | POU class 4 homeobox 2                                                   |
| POU6F1   | POU class 6 homeobox 1                                                   |
| PPARD    | peroxisome proliferator activated receptor delta                         |
| PRELP    | proline/arginine-rich end leucine-rich repeat protein                    |
| SRGN     | serglycin                                                                |
| PRKACG   | protein kinase cAMP-activated catalytic subunit gamma                    |
| PRL      | prolactin                                                                |
| PROP1    | PROP paired-like homeobox 1                                              |
| PROX1    | prospero homeobox 1                                                      |
| PTCH1    | patched 1                                                                |
| PTH1R    | parathyroid hormone 1 receptor                                           |
| RASA1    | RAS p21 protein activator 1                                              |
| RBP2     | retinol binding protein 2                                                |
| RNH1     | ribonuclease/angiogenin inhibitor 1                                      |
| ROBO1    | roundabout guidance receptor 1                                           |
| ROBO2    | roundabout guidance receptor 2                                           |
| RPS19    | ribosomal protein S19                                                    |
| RTN1     | reticulon 1                                                              |
| S100A7   | S100 calcium binding protein A7                                          |
| S100B    | S100 calcium binding protein B                                           |
| MAPK12   | mitogen-activated protein kinase 12                                      |
| SCN8A    | sodium voltage-gated channel alpha subunit 8                             |
| SECTM1   | secreted and transmembrane 1                                             |
| SGCA     | sarcoglycan alpha                                                        |
| SGCD     | sarcoglycan delta                                                        |
| SH3GL2   | SH3 domain containing GRB2 like 2, endophilin A1                         |
| SHH      | sonic hedgehog                                                           |
| SIAH1    | siah E3 ubiquitin protein ligase 1                                       |
| SIM1     | single-minded family bHLH transcription factor 1                         |
| SIM2     | single-minded family bHLH transcription factor 2                         |
| SIX3     | SIX homeobox 3                                                           |
| SLIT1    | slit guidance ligand 1                                                   |
| SLIT3    | slit guidance ligand 3                                                   |
| SNAI2    | snail family transcriptional repressor 2                                 |
| SMPD1    | sphingomyelin phosphodiesterase 1                                        |
| SNCA     | synuclein alpha                                                          |
| SOX11    | SRY-box 11                                                               |
| SPARC    | secreted protein acidic and cysteine rich                                |
| SPG7     | SPG7, paraplegin matrix AAA peptidase subunit                            |
| SPI1     | Spi-1 proto-oncogene                                                     |
| SPP2     | secreted phosphoprotein 2                                                |
| SPOCK1   | sparc/osteonectin, cwcv and kazal-like domains proteoglycan (testican) 1 |
| STAT3    | signal transducer and activator of transcription 3                       |
| SVIL     | supervillin                                                              |
| TBX5     | T-box 5                                                                  |
| TBX3     | T-box 3                                                                  |

|         |                                                                              |
|---------|------------------------------------------------------------------------------|
| TCF12   | transcription factor 12                                                      |
| TCOF1   | treacle ribosome biogenesis factor 1                                         |
| TFAP2A  | transcription factor AP-2 alpha                                              |
| TFAP2B  | transcription factor AP-2 beta                                               |
| TGFB1   | transforming growth factor beta 1                                            |
| KLF10   | Kruppel-like factor 10                                                       |
| TIE1    | tyrosine kinase with immunoglobulin like and EGF like domains 1              |
| TLE2    | transducin like enhancer of split 2                                          |
| TLE3    | transducin like enhancer of split 3                                          |
| TLL1    | tolloid like 1                                                               |
| NR2E1   | nuclear receptor subfamily 2 group E member 1                                |
| TPD52   | tumor protein D52                                                            |
| NR2C2   | nuclear receptor subfamily 2 group C member 2                                |
| TRPS1   | transcriptional repressor GATA binding 1                                     |
| UBB     | ubiquitin B                                                                  |
| UTRN    | utrophin                                                                     |
| WNT8B   | Wnt family member 8B                                                         |
| YWHAG   | tyrosine 3-monooxygenase/tryptophan 5-monooxygenase activation protein gamma |
| ZAP70   | zeta chain of T cell receptor associated protein kinase 70kDa                |
| ZIC2    | Zic family member 2                                                          |
| ZBTB16  | zinc finger and BTB domain containing 16                                     |
| CSDE1   | cold shock domain containing E1                                              |
| LST1    | leukocyte specific transcript 1                                              |
| LHX3    | LIM homeobox 3                                                               |
| ADAM12  | ADAM metalloproteinase domain 12                                             |
| ALX1    | ALX homeobox 1                                                               |
| ST8SIA2 | ST8 alpha-N-acetyl-neuraminide alpha-2,8-sialyltransferase 2                 |
| MKKS    | McKusick-Kaufman syndrome                                                    |
| DGCR6   | DiGeorge syndrome critical region gene 6                                     |
| DGCR14  | DiGeorge syndrome critical region gene 14                                    |
| DYRK3   | dual specificity tyrosine phosphorylation regulated kinase 3                 |
| LMO4    | LIM domain only 4                                                            |
| ADAM23  | ADAM metalloproteinase domain 23                                             |
| SCEL    | sciellin                                                                     |
| NRP2    | neuropilin 2                                                                 |
| NRP1    | neuropilin 1                                                                 |
| EIF2B3  | eukaryotic translation initiation factor 2B subunit gamma                    |
| EIF2B2  | eukaryotic translation initiation factor 2B subunit beta                     |
| CACNA1H | calcium voltage-gated channel subunit alpha1 H                               |
| KALRN   | kalirin, RhoGEF kinase                                                       |
| BRSK2   | BR serine/threonine kinase 2                                                 |
| SEMA5A  | semaphorin 5A                                                                |
| PAPSS1  | 3'-phosphoadenosine 5'-phosphosulfate synthase 1                             |
| SART1   | squamous cell carcinoma antigen recognized by T-cells 1                      |
| LARGE   | like-glycosyltransferase                                                     |
| KLF4    | Kruppel-like factor 4 (gut)                                                  |
| TGM5    | transglutaminase 5                                                           |
| SLIT2   | slit guidance ligand 2                                                       |
| KL      | klotho                                                                       |
| NRXN3   | neurexin 3                                                                   |
| NRXN1   | neurexin 1                                                                   |
| HAND2   | heart and neural crest derivatives expressed 2                               |
| TBX4    | T-box 4                                                                      |
| CELSR1  | cadherin EGF LAG seven-pass G-type receptor 1                                |
| HDAC9   | histone deacetylase 9                                                        |
| HDAC4   | histone deacetylase 4                                                        |
| ARNT2   | aryl hydrocarbon receptor nuclear translocator 2                             |

|         |                                                                   |
|---------|-------------------------------------------------------------------|
| FGF19   | fibroblast growth factor 19                                       |
| HDAC5   | histone deacetylase 5                                             |
| CLEC3A  | C-type lectin domain family 3 member A                            |
| SPRY2   | sprouty RTK signaling antagonist 2                                |
| SPEG    | SPEG complex locus                                                |
| IKZF1   | IKAROS family zinc finger 1                                       |
| SPON2   | spondin 2                                                         |
| OLFM1   | olfactomedin 1                                                    |
| BAIAP2  | BAI1 associated protein 2                                         |
| HOXB13  | homeobox B13                                                      |
| SEMA4F  | ssemaphorin 4F                                                    |
| DPYSL4  | dihydropyrimidinase like 4                                        |
| PDPN    | podoplanin                                                        |
| DMRT2   | doublesex and mab-3 related transcription factor 2                |
| AVIL    | advillin                                                          |
| DLL3    | delta like canonical Notch ligand 3                               |
| TBR1    | T-box, brain 1                                                    |
| VAMP5   | vesicle associated membrane protein 5                             |
| CYP46A1 | cytochrome P450 family 46 subfamily A member 1                    |
| GPR45   | G protein-coupled receptor 45                                     |
| POU6F2  | POU class 6 homeobox 2                                            |
| NTNG1   | netrin G1                                                         |
| NLGN1   | neuroligin 1                                                      |
| MYO16   | myosin XVI                                                        |
| STAB1   | stabilin 1                                                        |
| CYFIP1  | cytoplasmic FMR1 interacting protein 1                            |
| VAX2    | ventral anterior homeobox 2                                       |
| ATXN10  | ataxin 10                                                         |
| KLK5    | kallikrein related peptidase 5                                    |
| POU2F3  | POU class 2 homeobox 3                                            |
| PHGDH   | phosphoglycerate dehydrogenase                                    |
| LHX6    | LIM homeobox 6                                                    |
| NPTN    | neuroplastin                                                      |
| ATP2C1  | ATPase secretory pathway Ca <sup>2+</sup> transporting 1          |
| RND1    | Rho family GTPase 1                                               |
| MYLIP   | myosin regulatory light chain interacting protein                 |
| TMOD2   | tropomodulin 2                                                    |
| SOX8    | SRY-box 8                                                         |
| IL20    | interleukin 20                                                    |
| IRX4    | iroquois homeobox 4                                               |
| STMN3   | stathmin 3                                                        |
| UTP11   | UTP11, small subunit processome component homolog (S. cerevisiae) |
| EGFL7   | EGF like domain multiple 7                                        |
| PLCE1   | phospholipase C epsilon 1                                         |
| CRIM1   | cysteine rich transmembrane BMP regulator 1 (chordin-like)        |
| TRAPPC4 | trafficking protein particle complex 4                            |
| HPCAL4  | hippocalcin like 4                                                |
| SUFU    | SUFU negative regulator of hedgehog signaling                     |
| EMCN    | endomucin                                                         |
| SNTG2   | syntrophin gamma 2                                                |
| PCDH18  | protocadherin 18                                                  |
| ROBO4   | roundabout guidance receptor 4                                    |
| AGGF1   | angiogenic factor with G-patch and FHA domains 1                  |
| MAP1S   | microtubule associated protein 1S                                 |
| MAML3   | mastermind like transcriptional coactivator 3                     |
| PCDHB13 | protocadherin beta 13                                             |
| PCDHB12 | protocadherin beta 12                                             |

|                                   |                                                                                    |
|-----------------------------------|------------------------------------------------------------------------------------|
| PCDHB4                            | protocadherin beta 4                                                               |
| PCDHA1                            | protocadherin alpha 1                                                              |
| KIAA1217                          | KIAA1217                                                                           |
| PARD3                             | par-3 family cell polarity regulator                                               |
| ANKRD7                            | ankyrin repeat domain 7                                                            |
| C1GALT1                           | core 1 synthase, glycoprotein-N-acetylgalactosamine 3-beta-galactosyltransferase 1 |
| RTN4                              | reticulon 4                                                                        |
| SMURF1                            | SMAD specific E3 ubiquitin protein ligase 1                                        |
| DSCAML1                           | DS cell adhesion molecule like 1                                                   |
| AMIGO1                            | adhesion molecule with Ig-like domain 1                                            |
| ALPK3                             | alpha kinase 3                                                                     |
| LRRC4C                            | leucine rich repeat containing 4C                                                  |
| PCDHB16                           | protocadherin beta 16                                                              |
| MARK4                             | microtubule affinity regulating kinase 4                                           |
| NHEJ1                             | non-homologous end joining factor 1                                                |
| COL18A1                           | collagen type XVIII alpha 1                                                        |
| CCM2                              | CCM2 scaffolding protein                                                           |
| PARD6B                            | par-6 family cell polarity regulator beta                                          |
| KIRREL3                           | kin of IRRE like 3 (Drosophila)                                                    |
| NTNG2                             | netrin G2                                                                          |
| BOC                               | BOC cell adhesion associated, oncogene regulated                                   |
| ATPIF1                            | ATPase inhibitory factor 1                                                         |
| FOXP2                             | forkhead box P2                                                                    |
| APOA5                             | apolipoprotein A5                                                                  |
| GYLTL1B                           | glycosyltransferase-like 1B                                                        |
| DMBX1                             | diencephalon/mesencephalon homeobox 1                                              |
| IL31RA                            | interleukin 31 receptor A                                                          |
| NKX2-6                            | NK2 homeobox 6                                                                     |
| RTN4RL1                           | reticulon 4 receptor like 1                                                        |
| NFAM1                             | NFAT activating protein with ITAM motif 1                                          |
| CNTN4                             | contactin 4                                                                        |
| MDGA2                             | MAM domain containing glycosylphosphatidylinositol anchor 2                        |
| ZNF384                            | zinc finger protein 384                                                            |
| IL27                              | interleukin 27                                                                     |
| MDGA1                             | MAM domain containing glycosylphosphatidylinositol anchor 1                        |
| RTN4RL2                           | reticulon 4 receptor-like 2                                                        |
| AGRN                              | agrin                                                                              |
| <b>Nervous system development</b> |                                                                                    |
| <b>Gene Symbol</b>                | <b>Name Gene</b>                                                                   |
| ALDH3A2                           | aldehyde dehydrogenase 3 family member A2                                          |
| ALK                               | anaplastic lymphoma receptor tyrosine kinase                                       |
| APAF1                             | apoptotic peptidase activating factor 1                                            |
| APLP1                             | amyloid beta precursor like protein 1                                              |
| ATP2B2                            | ATPase plasma membrane Ca <sup>2+</sup> transporting 2                             |
| AZU1                              | azurocidin 1                                                                       |
| BDNF                              | brain-derived neurotrophic factor                                                  |
| BTD                               | biotinidase                                                                        |
| MPPED2                            | metallophosphoesterase domain containing 2                                         |
| CBLN1                             | cerebellin 1 precursor                                                             |
| CDK6                              | cyclin-dependent kinase 6                                                          |
| CHRM1                             | cholinergic receptor muscarinic 1                                                  |
| CHRM2                             | cholinergic receptor muscarinic 2                                                  |
| CHRM3                             | cholinergic receptor muscarinic 3                                                  |
| CHRNA4                            | cholinergic receptor nicotinic alpha 4 subunit                                     |
| CNTFR                             | ciliary neurotrophic factor receptor                                               |
| CTF1                              | cardiotrophin 1                                                                    |
| CTNS                              | cystinosin, lysosomal cystine transporter                                          |



|          |                                                                     |
|----------|---------------------------------------------------------------------|
| DLX2     | distal-less homeobox 2                                              |
| DLX5     | distal-less homeobox 5                                              |
| DPYSL2   | dihydropyrimidinase like 2                                          |
| DPYSL3   | dihydropyrimidinase like 3                                          |
| DSCAM    | DS cell adhesion molecule                                           |
| DTX1     | deltex 1                                                            |
| DVL3     | dishevelled segment polarity protein 3                              |
| DYRK1A   | dual specificity tyrosine phosphorylation regulated kinase 1A       |
| EFNA5    | ephrin A5                                                           |
| EGR2     | early growth response 2                                             |
| EPHB1    | EPH receptor B1                                                     |
| EPHB2    | EPH receptor B2                                                     |
| CLN8     | ceroid-lipofuscinosis, neuronal 8                                   |
| FGF12    | fibroblast growth factor 12                                         |
| FOXP1    | forkhead box G1                                                     |
| GNF      | glial cell derived neurotrophic factor                              |
| GFRA3    | GDNF family receptor alpha 3                                        |
| GLI2     | GLI family zinc finger 2                                            |
| CXCL1    | C-X-C motif chemokine ligand 1                                      |
| HES1     | hes family bHLH transcription factor 1                              |
| JARID2   | jumonji and AT-rich interaction domain containing 2                 |
| KCNQ2    | potassium voltage-gated channel subfamily Q member 2                |
| LHX1     | LIM homeobox 1                                                      |
| LMX1B    | LIM homeobox transcription factor 1 beta                            |
| LRCH4    | leucine-rich repeats and calponin homology (CH) domain containing 4 |
| LSAMP    | limbic system-associated membrane protein                           |
| LY6H     | lymphocyte antigen 6 complex, locus H                               |
| MAL      | mal, T-cell differentiation protein                                 |
| MAPT     | microtubule associated protein tau                                  |
| MBNL1    | muscleblind like splicing regulator 1                               |
| MBP      | myelin basic protein                                                |
| MEF2C    | myocyte enhancer factor 2C                                          |
| MOG      | myelin oligodendrocyte glycoprotein                                 |
| NAB2     | NGFI-A binding protein 2                                            |
| NDUFV2   | NADH:ubiquinone oxidoreductase core subunit V2                      |
| NELL1    | neural EGFL like 1                                                  |
| NEUROD2  | neuronal differentiation 2                                          |
| NEUROG1  | neurogenin 1                                                        |
| NF1      | neurofibromin 1                                                     |
| NF2      | neurofibromin 2 (merlin)                                            |
| NHLH2    | nescient helix-loop-helix 2                                         |
| NINJ2    | ninjurin 2                                                          |
| NKX2-2   | NK2 homeobox 2                                                      |
| NPAS2    | neuronal PAS domain protein 2                                       |
| NPTX1    | neuronal pentraxin 1                                                |
| NRCAM    | neuronal cell adhesion molecule                                     |
| NRTN     | neurturin                                                           |
| NTF3     | neurotrophin 3                                                      |
| PAFAH1B3 | platelet activating factor acetylhydrolase 1b catalytic subunit 3   |
| PARK2    | parkin RBR E3 ubiquitin protein ligase                              |
| PAX2     | paired box 2                                                        |
| PAX6     | paired box 6                                                        |
| PBX1     | PBX homeobox 1                                                      |
| PBX3     | PBX homeobox 3                                                      |
| PCDH1    | protocadherin 1                                                     |
| PCP4     | Purkinje cell protein 4                                             |
| SERPIN1  | serpin family I member 1                                            |

|         |                                                                              |
|---------|------------------------------------------------------------------------------|
| POU3F3  | POU class 3 homeobox 3                                                       |
| POU4F2  | POU class 4 homeobox 2                                                       |
| POU6F1  | POU class 6 homeobox 1                                                       |
| PPARD   | peroxisome proliferator activated receptor delta                             |
| PSPN    | persephin                                                                    |
| PROP1   | PROP paired-like homeobox 1                                                  |
| PTS     | 6-pyruvoyltetrahydropterin synthase                                          |
| ROBO1   | roundabout guidance receptor 1                                               |
| ROBO2   | roundabout guidance receptor 2                                               |
| RTN1    | reticulon 1                                                                  |
| S100B   | S100 calcium binding protein B                                               |
| SCN8A   | sodium voltage-gated channel alpha subunit 8                                 |
| SH3GL2  | SH3 domain containing GRB2 like 2, endophilin A1                             |
| SH3GL3  | SH3 domain containing GRB2 like endophilin A3                                |
| SHH     | sonic hedgehog                                                               |
| SIAH1   | siah E3 ubiquitin protein ligase 1                                           |
| SIM1    | single-minded family bHLH transcription factor 1                             |
| SIM2    | single-minded family bHLH transcription factor 2                             |
| SIX3    | SIX homeobox 3                                                               |
| SLIT1   | slit guidance ligand 1                                                       |
| SLIT3   | slit guidance ligand 3                                                       |
| SMPD1   | sphingomyelin phosphodiesterase 1                                            |
| SNCA    | synuclein alpha                                                              |
| SOX11   | SRY-box 11                                                                   |
| SPG7    | SPG7, paraplegin matrix AAA peptidase subunit                                |
| SPOCK1  | sparc/osteonectin, cwcv and kazal-like domains proteoglycan (testican) 1     |
| STAT3   | signal transducer and activator of transcription 3                           |
| TFAP2B  | transcription factor AP-2 beta                                               |
| NR2E1   | nuclear receptor subfamily 2 group E member 1                                |
| NR2C2   | nuclear receptor subfamily 2 group C member 2                                |
| UBB     | ubiquitin B                                                                  |
| WNT8B   | Wnt family member 8B                                                         |
| YWHAG   | tyrosine 3-monooxygenase/tryptophan 5-monooxygenase activation protein gamma |
| ZIC2    | Zic family member 2                                                          |
| ZBTB16  | zinc finger and BTB domain containing 16                                     |
| LST1    | leukocyte specific transcript 1                                              |
| ALX1    | ALX homeobox 1                                                               |
| ST8SIA2 | ST8 alpha-N-acetyl-neuraminide alpha-2,8-sialyltransferase 2                 |
| DGCR14  | DiGeorge syndrome critical region gene 14                                    |
| LMO4    | LIM domain only 4                                                            |
| ADAM23  | ADAM metallopeptidase domain 23                                              |
| NRP2    | neuropilin 2                                                                 |
| NRP1    | neuropilin 1                                                                 |
| EIF2B3  | eukaryotic translation initiation factor 2B subunit gamma                    |
| EIF2B2  | eukaryotic translation initiation factor 2B subunit beta                     |
| KALRN   | kalirin, RhoGEF kinase                                                       |
| BRSK2   | BR serine/threonine kinase 2                                                 |
| SEMA5A  | semaphorin 5A                                                                |
| LG1     | leucine-rich, glioma inactivated 1                                           |
| SLIT2   | slit guidance ligand 2                                                       |
| NRXN3   | neurexin 3                                                                   |
| NRXN1   | neurexin 1                                                                   |
| CELSR1  | cadherin EGF LAG seven-pass G-type receptor 1                                |
| HDAC4   | histone deacetylase 4                                                        |
| ARNT2   | aryl hydrocarbon receptor nuclear translocator 2                             |
| FGF19   | fibroblast growth factor 19                                                  |

|                         |                                                                   |
|-------------------------|-------------------------------------------------------------------|
| SPON2                   | spondin 2                                                         |
| OLFM1                   | olfactomedin 1                                                    |
| BAIAP2                  | BAI1 associated protein 2                                         |
| SEMA4F                  | ssemaphorin 4F                                                    |
| DPYSL4                  | dihydropyrimidinase like 4                                        |
| AVIL                    | advillin                                                          |
| TBR1                    | T-box, brain 1                                                    |
| CYP46A1                 | cytochrome P450 family 46 subfamily A member 1                    |
| GPR45                   | G protein-coupled receptor 45                                     |
| POU6F2                  | POU class 6 homeobox 2                                            |
| NTNG1                   | netrin G1                                                         |
| NLGN1                   | neuroligin 1                                                      |
| MYO16                   | myosin XVI                                                        |
| CYFIP1                  | cytoplasmic FMR1 interacting protein 1                            |
| ATXN10                  | ataxin 10                                                         |
| PHGDH                   | phosphoglycerate dehydrogenase                                    |
| LHX6                    | LIM homeobox 6                                                    |
| NPTN                    | neuroplastin                                                      |
| RND1                    | Rho family GTPase 1                                               |
| MYLIP                   | myosin regulatory light chain interacting protein                 |
| TMOD2                   | tropomodulin 2                                                    |
| SOX8                    | SRY-box 8                                                         |
| STMN3                   | stathmin 3                                                        |
| UTP11                   | UTP11, small subunit processome component homolog (S. cerevisiae) |
| CRIM1                   | cysteine rich transmembrane BMP regulator 1 (chordin-like)        |
| TRAPPC4                 | trafficking protein particle complex 4                            |
| HPCAL4                  | hippocalcin like 4                                                |
| SNTG2                   | syntrophin gamma 2                                                |
| PCDH18                  | protocadherin 18                                                  |
| MAP1S                   | microtubule associated protein 1S                                 |
| MAML3                   | mastermind like transcriptional coactivator 3                     |
| PCDHB13                 | protocadherin beta 13                                             |
| PCDHB12                 | protocadherin beta 12                                             |
| PCDHB4                  | protocadherin beta 4                                              |
| PCDHB3                  | protocadherin beta 3                                              |
| PCDHA1                  | protocadherin alpha 1                                             |
| PARD3                   | par-3 family cell polarity regulator                              |
| RTN4                    | reticulon 4                                                       |
| DSCAML1                 | DS cell adhesion molecule like 1                                  |
| AMIGO1                  | adhesion molecule with Ig-like domain 1                           |
| LRRC4C                  | leucine rich repeat containing 4C                                 |
| PCDHB16                 | protocadherin beta 16                                             |
| MARK4                   | microtubule affinity regulating kinase 4                          |
| PARD6B                  | par-6 family cell polarity regulator beta                         |
| NTNG2                   | netrin G2                                                         |
| FOXP2                   | forkhead box P2                                                   |
| DMBX1                   | diencephalon/mesencephalon homeobox 1                             |
| RTN4RL1                 | reticulon 4 receptor like 1                                       |
| CNTN4                   | contactin 4                                                       |
| MDGA2                   | MAM domain containing glycosylphosphatidylinositol anchor 2       |
| ZNF384                  | zinc finger protein 384                                           |
| MDGA1                   | MAM domain containing glycosylphosphatidylinositol anchor 1       |
| RTN4RL2                 | reticulon 4 receptor-like 2                                       |
| AGRN                    | agrin                                                             |
| <b>Cell development</b> |                                                                   |
| <b>Gene Symbol</b>      | <b>Name Gene</b>                                                  |
| ACTA1                   | actin, alpha 1, skeletal muscle                                   |

|          |                                                        |
|----------|--------------------------------------------------------|
| ADRA1A   | adrenoceptor alpha 1A                                  |
| ANXA1    | annexin A1                                             |
| APAF1    | apoptotic peptidase activating factor 1                |
| BIRC3    | baculoviral IAP repeat containing 3                    |
| BIRC5    | baculoviral IAP repeat containing 5                    |
| FASLG    | Fas ligand                                             |
| ARHGDI1A | Rho GDP dissociation inhibitor alpha                   |
| ATP2B2   | ATPase plasma membrane Ca <sup>2+</sup> transporting 2 |
| AZU1     | azurocidin 1                                           |
| BARD1    | BRCA1 associated RING domain 1                         |
| BCL2     | B-cell CLL/lymphoma 2                                  |
| BCL6     | B-cell CLL/lymphoma 6                                  |
| BMP2     | bone morphogenetic protein 2                           |
| BMP7     | bone morphogenetic protein 7                           |
| BNIP2    | BCL2/adenovirus E1B 19kDa interacting protein 2        |
| BNIP3    | BCL2/adenovirus E1B 19kDa interacting protein 3        |
| BOK      | BCL2-related ovarian killer                            |
| FOXL2    | forkhead box L2                                        |
| BRCA1    | breast cancer 1                                        |
| CACNA1A  | calcium voltage-gated channel subunit alpha1 A         |
| CACNB2   | calcium voltage-gated channel auxiliary subunit beta 2 |
| CASP3    | caspase 3                                              |
| RUNX3    | runt related transcription factor 3                    |
| CD2      | CD2 molecule                                           |
| CD28     | CD28 molecule                                          |
| TNFRSF8  | tumor necrosis factor receptor superfamily member 8    |
| TNFSF8   | tumor necrosis factor superfamily member 8             |
| CD38     | CD38 molecule                                          |
| CD70     | CD70 molecule                                          |
| CD74     | CD74 molecule                                          |
| CDH13    | cadherin 13                                            |
| CDK6     | cyclin-dependent kinase 6                              |
| CDKN1B   | cyclin-dependent kinase inhibitor 1B                   |
| CHRNA1   | cholinergic receptor nicotinic alpha 1 subunit         |
| CRYAA    | crystallin alpha A                                     |
| DAD1     | defender against cell death 1                          |
| DAP      | death-associated protein                               |
| DAPK3    | death-associated protein kinase 3                      |
| DAXX     | death-domain associated protein                        |
| GADD45A  | growth arrest and DNA damage inducible alpha           |
| DOCK1    | dedicator of cytokinesis 1                             |
| DTX1     | deltex 1                                               |
| ERCC2    | excision repair cross-complementation group 2          |
| ERCC3    | excision repair cross-complementation group 3          |
| F2R      | coagulation factor II thrombin receptor                |
| PTK2B    | protein tyrosine kinase 2 beta                         |
| FOXO1    | forkhead box O1                                        |
| FOXO3    | forkhead box O3                                        |
| IFI6     | interferon alpha inducible protein 6                   |
| GDNF     | glial cell derived neurotrophic factor                 |
| GLI2     | GLI family zinc finger 2                               |
| GRIK2    | glutamate ionotropic receptor kainate type subunit 2   |
| GRM4     | glutamate metabotropic receptor 4                      |
| HDAC1    | histone deacetylase 1                                  |
| HGF      | hepatocyte growth factor                               |
| HIP1     | huntingtin interacting protein 1                       |
| HMGB1    | high mobility group box 1                              |
| HNRNPAB  | heterogeneous nuclear ribonucleoprotein A/B            |

|          |                                                            |
|----------|------------------------------------------------------------|
| HSPA2    | heat shock protein family A (Hsp70) member 2               |
| IGF1R    | insulin like growth factor 1 receptor                      |
| IGFBP3   | insulin like growth factor binding protein 3               |
| IL2RA    | interleukin 2 receptor subunit alpha                       |
| IL6      | interleukin 6                                              |
| IL7      | interleukin 7                                              |
| LCK      | LCK proto-oncogene, Src family tyrosine kinase             |
| LMX1B    | LIM homeobox transcription factor 1 beta                   |
| LRMP     | lymphoid restricted membrane protein                       |
| SMAD3    | SMAD family member 3                                       |
| MAL      | mal, T-cell differentiation protein                        |
| MAPT     | microtubule associated protein tau                         |
| MBNL1    | muscleblind like splicing regulator 1                      |
| MDM4     | MDM4, p53 regulator                                        |
| MPO      | myeloperoxidase                                            |
| MX1      | MX dynamin like GTPase 1                                   |
| MYH11    | myosin, heavy chain 11, smooth muscle                      |
| NF1      | neurofibromin 1                                            |
| NF2      | neurofibromin 2 (merlin)                                   |
| NFKBIA   | NFKB inhibitor alpha                                       |
| NOTCH1   | notch 1                                                    |
| NRCAM    | neuronal cell adhesion molecule                            |
| NRL      | neural retina leucine zipper                               |
| OPA1     | OPA1, mitochondrial dynamin like GTPase                    |
| SERPINB2 | serpin family B member 2                                   |
| PAWR     | pro-apoptotic WT1 regulator                                |
| PAX2     | paired box 2                                               |
| PAX7     | paired box 7                                               |
| PDCD1    | programmed cell death 1                                    |
| PIM1     | Pim-1 proto-oncogene, serine/threonine kinase              |
| PIK3R2   | phosphoinositide-3-kinase regulatory subunit 2             |
| PLAGL1   | PLAG1 like zinc finger 1                                   |
| PLG      | plasminogen                                                |
| PMAIP1   | phorbol-12-myristate-13-acetate-induced protein 1          |
| SRGN     | serglycin                                                  |
| PRKCA    | protein kinase C alpha                                     |
| PRKCE    | protein kinase C epsilon                                   |
| PRKCZ    | protein kinase C zeta                                      |
| PRL      | prolactin                                                  |
| PROC     | protein C, inactivator of coagulation factors Va and VIIIa |
| PSEN2    | presenilin 2                                               |
| PTGER3   | prostaglandin E receptor 3                                 |
| PTPN6    | protein tyrosine phosphatase, non-receptor type 6          |
| RASA1    | RAS p21 protein activator 1                                |
| DPF2     | double PHD fingers 2                                       |
| ROBO1    | roundabout guidance receptor 1                             |
| ROBO2    | roundabout guidance receptor 2                             |
| RTKN     | rhotekin                                                   |
| S100B    | S100 calcium binding protein B                             |
| MAPK12   | mitogen-activated protein kinase 12                        |
| SFRP1    | secreted frizzled related protein 1                        |
| SHH      | sonic hedgehog                                             |
| SIAH1    | siah E3 ubiquitin protein ligase 1                         |
| SLIT1    | slit guidance ligand 1                                     |
| SNCA     | synuclein alpha                                            |
| SSTR3    | somatostatin receptor 3                                    |
| STAT1    | signal transducer and activator of transcription 1         |
| STK3     | serine/threonine kinase 3                                  |

|           |                                                                              |
|-----------|------------------------------------------------------------------------------|
| TBX5      | T-box 5                                                                      |
| TBX3      | T-box 3                                                                      |
| TGFB1     | transforming growth factor beta 1                                            |
| TIAL1     | TIA1 cytotoxic granule-associated RNA binding protein-like 1                 |
| TNP1      | transition protein 1                                                         |
| TOP2A     | topoisomerase (DNA) II alpha                                                 |
| TP53BP2   | tumor protein p53 binding protein 2                                          |
| TP73      | tumor protein p73                                                            |
| TPD52L1   | tumor protein D52-like 1                                                     |
| TRAF3     | TNF receptor associated factor 3                                             |
| UBB       | ubiquitin B                                                                  |
| VDAC1     | voltage dependent anion channel 1                                            |
| YWHAG     | tyrosine 3-monooxygenase/tryptophan 5-monooxygenase activation protein gamma |
| YWHAZ     | tyrosine 3-monooxygenase/tryptophan 5-monooxygenase activation protein zeta  |
| LST1      | leukocyte specific transcript 1                                              |
| ADAM12    | ADAM metalloproteinase domain 12                                             |
| AXIN1     | axin 1                                                                       |
| TNFRSF25  | tumor necrosis factor receptor superfamily member 25                         |
| CRADD     | CASP2 and RIPK1 domain containing adaptor with death domain                  |
| HRK       | harakiri, BCL2 interacting protein                                           |
| TNFSF14   | tumor necrosis factor superfamily member 14                                  |
| TNFSF9    | tumor necrosis factor superfamily member 9                                   |
| TNFRSF18  | tumor necrosis factor receptor superfamily member 18                         |
| TNFRSF10D | tumor necrosis factor receptor superfamily member 10d                        |
| NRP2      | neuropilin 2                                                                 |
| NRP1      | neuropilin 1                                                                 |
| SOCS2     | suppressor of cytokine signaling 2                                           |
| CFLAR     | CASP8 and FADD like apoptosis regulator                                      |
| IER3      | immediate early response 3                                                   |
| NAE1      | NEDD8 activating enzyme E1 subunit 1                                         |
| EIF2B3    | eukaryotic translation initiation factor 2B subunit gamma                    |
| EIF2B2    | eukaryotic translation initiation factor 2B subunit beta                     |
| CACNA1H   | calcium voltage-gated channel subunit alpha1 H                               |
| TNFSF18   | tumor necrosis factor superfamily member 18                                  |
| SOCS3     | suppressor of cytokine signaling 3                                           |
| BRSK2     | BR serine/threonine kinase 2                                                 |
| DEDD      | death effector domain containing                                             |
| STK17A    | serine/threonine kinase 17a                                                  |
| SLIT2     | slit guidance ligand 2                                                       |
| NRXN3     | neurexin 3                                                                   |
| NRXN1     | neurexin 1                                                                   |
| NCR1      | natural cytotoxicity triggering receptor 1                                   |
| BRE       | brain and reproductive organ-expressed (TNFRSF1A modulator)                  |
| RNF7      | ring finger protein 7                                                        |
| CEP57     | centrosomal protein 57                                                       |
| BCL2L11   | BCL2 like 11                                                                 |
| DNAJB6    | DnaJ heat shock protein family (Hsp40) member B6                             |
| HIPK3     | homeodomain interacting protein kinase 3                                     |
| MAEA      | macrophage erythroblast attacher                                             |
| SPON2     | spondin 2                                                                    |
| BAIAP2    | BAI1 associated protein 2                                                    |
| CIB1      | calcium and integrin binding 1                                               |
| DEAF1     | DEAF1, transcription factor                                                  |
| SIVA1     | SIVA1 apoptosis inducing factor                                              |
| RRAGA     | Ras related GTP binding A                                                    |
| CHEK2     | checkpoint kinase 2                                                          |

|                                         |                                                                   |
|-----------------------------------------|-------------------------------------------------------------------|
| POU6F2                                  | POU class 6 homeobox 2                                            |
| NTNG1                                   | netrin G1                                                         |
| NLGN1                                   | neuroligin 1                                                      |
| CYFIP1                                  | cytoplasmic FMR1 interacting protein 1                            |
| DDAH2                                   | dimethylarginine dimethylaminohydrolase 2                         |
| ZNF346                                  | zinc finger protein 346                                           |
| PPP1R15A                                | protein phosphatase 1 regulatory subunit 15A                      |
| CADM1                                   | cell adhesion molecule 1                                          |
| TNFAIP8                                 | TNF alpha induced protein 8                                       |
| AATF                                    | apoptosis antagonizing transcription factor                       |
| CYFIP2                                  | cytoplasmic FMR1 interacting protein 2                            |
| NPTN                                    | neuroplastin                                                      |
| CIDEB                                   | cell death-inducing DFFA-like effector b                          |
| CECR2                                   | CECR2, histone acetyl-lysine reader                               |
| SH3GLB1                                 | SH3 domain containing GRB2 like endophilin B1                     |
| UTP11                                   | UTP11, small subunit processome component homolog (S. cerevisiae) |
| BFAR                                    | bifunctional apoptosis regulator                                  |
| TRAPPC4                                 | trafficking protein particle complex 4                            |
| DDX41                                   | DEAD-box helicase 41                                              |
| GULP1                                   | GULP, engulfment adaptor PTB domain containing 1                  |
| ZAK                                     | sterile alpha motif and leucine zipper containing kinase AZK      |
| MOV10L1                                 | Mov10 RISC complex RNA helicase like 1                            |
| ADAMTSL4                                | ADAMTS like 4                                                     |
| MAP1S                                   | microtubule associated protein 1S                                 |
| PARD3                                   | par-3 family cell polarity regulator                              |
| RTN4                                    | reticulon 4                                                       |
| AMIGO1                                  | adhesion molecule with Ig-like domain 1                           |
| LRRC4C                                  | leucine rich repeat containing 4C                                 |
| NLRC4                                   | NLR family, CARD domain containing 4                              |
| CIDEC                                   | cell death inducing DFFA like effector c                          |
| TP53AIP1                                | tumor protein p53 regulated apoptosis inducing protein 1          |
| PARD6B                                  | par-6 family cell polarity regulator beta                         |
| AIFM2                                   | apoptosis inducing factor, mitochondria associated 2              |
| BMF                                     | Bcl2 modifying factor                                             |
| BOC                                     | BOC cell adhesion associated, oncogene regulated                  |
| NLRP3                                   | NLR family, pyrin domain containing 3                             |
| IKBIP                                   | IKBKB interacting protein                                         |
| JMY                                     | junction mediating and regulatory protein, p53 cofactor           |
| RTN4RL1                                 | reticulon 4 receptor like 1                                       |
| CNTN4                                   | contactin 4                                                       |
| PRUNE2                                  | prune homolog 2 (Drosophila)                                      |
| MDGA2                                   | MAM domain containing glycosylphosphatidylinositol anchor 2       |
| MDGA1                                   | MAM domain containing glycosylphosphatidylinositol anchor 1       |
| RTN4RL2                                 | reticulon 4 receptor-like 2                                       |
| DNAJB13                                 | DnaJ heat shock protein family (Hsp40) member B13                 |
| AGRN                                    | agrin                                                             |
| MYO18A                                  | myosin XVIII A                                                    |
| <b>Regulation developmental process</b> |                                                                   |
| <b>Gene Symbol</b>                      | <b>Name Gene</b>                                                  |
| ANXA1                                   | annexin A1                                                        |
| APAF1                                   | apoptotic peptidase activating factor 1                           |
| BIRC3                                   | baculoviral IAP repeat containing 3                               |
| BIRC5                                   | baculoviral IAP repeat containing 5                               |
| FASLG                                   | Fas ligand                                                        |
| ARHGDI A                                | Rho GDP dissociation inhibitor alpha                              |
| BCL2                                    | B-cell CLL/lymphoma 2                                             |
| BCL6                                    | B-cell CLL/lymphoma 6                                             |

|         |                                                     |
|---------|-----------------------------------------------------|
| BNIP2   | BCL2/adenovirus E1B 19kDa interacting protein 2     |
| BNIP3   | BCL2/adenovirus E1B 19kDa interacting protein 3     |
| BOK     | BCL2-related ovarian killer                         |
| FOXL2   | forkhead box L2                                     |
| BRCA1   | breast cancer 1                                     |
| CALCA   | calcitonin related polypeptide alpha                |
| CASP3   | caspase 3                                           |
| RUNX1   | runt related transcription factor 1                 |
| RUNX3   | runt related transcription factor 3                 |
| CD2     | CD2 molecule                                        |
| CD28    | CD28 molecule                                       |
| TNFRSF8 | tumor necrosis factor receptor superfamily member 8 |
| TNFSF8  | tumor necrosis factor superfamily member 8          |
| CD38    | CD38 molecule                                       |
| CD70    | CD70 molecule                                       |
| CD74    | CD74 molecule                                       |
| CDH13   | cadherin 13                                         |
| CDK6    | cyclin-dependent kinase 6                           |
| CDKN1B  | cyclin-dependent kinase inhibitor 1B                |
| COL4A2  | collagen type IV alpha 2                            |
| CRYAA   | crystallin alpha A                                  |
| DAD1    | defender against cell death 1                       |
| DAP     | death-associated protein                            |
| DAPK3   | death-associated protein kinase 3                   |
| DAXX    | death-domain associated protein                     |
| DTX1    | deltex 1                                            |
| ERCC3   | excision repair cross-complementation group 3       |
| ETS1    | ETS proto-oncogene 1, transcription factor          |
| F2R     | coagulation factor II thrombin receptor             |
| FOXO1   | forkhead box O1                                     |
| FOXO3   | forkhead box O3                                     |
| IFI6    | interferon alpha inducible protein 6                |
| GDNF    | glial cell derived neurotrophic factor              |
| GRM4    | glutamate metabotropic receptor 4                   |
| HDAC1   | histone deacetylase 1                               |
| HIP1    | huntingtin interacting protein 1                    |
| HMGB1   | high mobility group box 1                           |
| IGF1R   | insulin like growth factor 1 receptor               |
| IGFBP3  | insulin like growth factor binding protein 3        |
| IL6     | interleukin 6                                       |
| IL7     | interleukin 7                                       |
| LCK     | LCK proto-oncogene, Src family tyrosine kinase      |
| SMAD3   | SMAD family member 3                                |
| MAPT    | microtubule associated protein tau                  |
| MPO     | myeloperoxidase                                     |
| MX1     | MX dynamin like GTPase 1                            |
| MYH9    | myosin, heavy chain 9, non-muscle                   |
| NF1     | neurofibromin 1                                     |
| NOTCH1  | notch 1                                             |
| NOTCH4  | notch 4                                             |
| NPR1    | natriuretic peptide receptor 1                      |
| OPA1    | OPA1, mitochondrial dynamin like GTPase             |
| PAX7    | paired box 7                                        |
| PF4     | platelet factor 4                                   |
| PIM1    | Pim-1 proto-oncogene, serine/threonine kinase       |
| PIK3R2  | phosphoinositide-3-kinase regulatory subunit 2      |
| PLAGL1  | PLAG1 like zinc finger 1                            |
| PLG     | plasminogen                                         |



|           |                                                                              |
|-----------|------------------------------------------------------------------------------|
| PMAIP1    | phorbol-12-myristate-13-acetate-induced protein 1                            |
| PPARG     | peroxisome proliferator activated receptor gamma                             |
| SRGN      | serglycin                                                                    |
| PRKCA     | protein kinase C alpha                                                       |
| PRKCE     | protein kinase C epsilon                                                     |
| PRKCZ     | protein kinase C zeta                                                        |
| PROC      | protein C, inactivator of coagulation factors Va and VIIIa                   |
| RASA1     | RAS p21 protein activator 1                                                  |
| DPF2      | double PHD fingers 2                                                         |
| RNH1      | ribonuclease/angiogenin inhibitor 1                                          |
| ROBO1     | roundabout guidance receptor 1                                               |
| ROBO2     | roundabout guidance receptor 2                                               |
| RTKN      | rhotekin                                                                     |
| SFRP1     | secreted frizzled related protein 1                                          |
| SHH       | sonic hedgehog                                                               |
| SNCA      | synuclein alpha                                                              |
| SPI1      | Spi-1 proto-oncogene                                                         |
| SSTR3     | somatostatin receptor 3                                                      |
| STAT1     | signal transducer and activator of transcription 1                           |
| STK3      | serine/threonine kinase 3                                                    |
| TBX5      | T-box 5                                                                      |
| TBX3      | T-box 3                                                                      |
| TGFB1     | transforming growth factor beta 1                                            |
| TIAL1     | TIA1 cytotoxic granule-associated RNA binding protein-like 1                 |
| TOP2A     | topoisomerase (DNA) II alpha                                                 |
| TP53BP2   | tumor protein p53 binding protein 2                                          |
| TP73      | tumor protein p73                                                            |
| TPD52L1   | tumor protein D52-like 1                                                     |
| TRAF3     | TNF receptor associated factor 3                                             |
| YWHAG     | tyrosine 3-monooxygenase/tryptophan 5-monooxygenase activation protein gamma |
| YWHAZ     | tyrosine 3-monooxygenase/tryptophan 5-monooxygenase activation protein zeta  |
| ZAP70     | zeta chain of T cell receptor associated protein kinase 70kDa                |
| ZBTB16    | zinc finger and BTB domain containing 16                                     |
| TNFRSF25  | tumor necrosis factor receptor superfamily member 25                         |
| CRADD     | CASP2 and RIPK1 domain containing adaptor with death domain                  |
| HRK       | harakiri, BCL2 interacting protein                                           |
| TNFSF14   | tumor necrosis factor superfamily member 14                                  |
| TNFRSF18  | tumor necrosis factor receptor superfamily member 18                         |
| TNFRSF10D | tumor necrosis factor receptor superfamily member 10d                        |
| CFLAR     | CASP8 and FADD like apoptosis regulator                                      |
| IER3      | immediate early response 3                                                   |
| NAE1      | NEDD8 activating enzyme E1 subunit 1                                         |
| TNFSF18   | tumor necrosis factor superfamily member 18                                  |
| SOCS3     | suppressor of cytokine signaling 3                                           |
| SART1     | squamous cell carcinoma antigen recognized by T-cells 1                      |
| DEDD      | death effector domain containing                                             |
| SLIT2     | slit guidance ligand 2                                                       |
| KL        | klotho                                                                       |
| NCR1      | natural cytotoxicity triggering receptor 1                                   |
| BRE       | brain and reproductive organ-expressed (TNFRSF1A modulator)                  |
| RNF7      | ring finger protein 7                                                        |
| HDAC4     | histone deacetylase 4                                                        |
| HDAC5     | histone deacetylase 5                                                        |
| BCL2L11   | BCL2 like 11                                                                 |
| DNAJB6    | DnaJ heat shock protein family (Hsp40) member B6                             |
| HIPK3     | homeodomain interacting protein kinase 3                                     |

|                              |                                                                   |
|------------------------------|-------------------------------------------------------------------|
| CDC42EP2                     | CDC42 effector protein 2                                          |
| SIVA1                        | SIVA1 apoptosis inducing factor                                   |
| RRAGA                        | Ras related GTP binding A                                         |
| CHEK2                        | checkpoint kinase 2                                               |
| NLGN1                        | neuroligin 1                                                      |
| STAB1                        | stabilin 1                                                        |
| DDAH2                        | dimethylarginine dimethylaminohydrolase 2                         |
| CADM1                        | cell adhesion molecule 1                                          |
| TNFAIP8                      | TNF alpha induced protein 8                                       |
| AATF                         | apoptosis antagonizing transcription factor                       |
| NPTN                         | neuroplastin                                                      |
| CIDEB                        | cell death-inducing DFFA-like effector b                          |
| IL20                         | interleukin 20                                                    |
| SH3GLB1                      | SH3 domain containing GRB2 like endophilin B1                     |
| UTP11                        | UTP11, small subunit processome component homolog (S. cerevisiae) |
| BFAR                         | bifunctional apoptosis regulator                                  |
| ZAK                          | sterile alpha motif and leucine zipper containing kinase AZK      |
| ADAMTSL4                     | ADAMTS like 4                                                     |
| AGGF1                        | angiogenic factor with G-patch and FHA domains 1                  |
| FGD6                         | FYVE, RhoGEF and PH domain containing 6                           |
| RTN4                         | reticulon 4                                                       |
| AMIGO1                       | adhesion molecule with Ig-like domain 1                           |
| LRRC4C                       | leucine rich repeat containing 4C                                 |
| NLRC4                        | NLR family, CARD domain containing 4                              |
| CIDEC                        | cell death inducing DFFA like effector c                          |
| ARAP3                        | ArfGAP with RhoGAP domain, ankyrin repeat and PH domain 3         |
| AIFM2                        | apoptosis inducing factor, mitochondria associated 2              |
| BOC                          | BOC cell adhesion associated, oncogene regulated                  |
| NLRP3                        | NLR family, pyrin domain containing 3                             |
| ARAP1                        | ArfGAP with RhoGAP domain, ankyrin repeat and PH domain 1         |
| IKBIP                        | IKKKB interacting protein                                         |
| JMY                          | junction mediating and regulatory protein, p53 cofactor           |
| SIK1                         | salt inducible kinase 1                                           |
| FGD5                         | FYVE, RhoGEF and PH domain containing 5                           |
| CNTN4                        | contactin 4                                                       |
| PRUNE2                       | prune homolog 2 (Drosophila)                                      |
| FGD2                         | FYVE, RhoGEF and PH domain containing 2                           |
| IL27                         | interleukin 27                                                    |
| MYO18A                       | myosin XVIII A                                                    |
| <b>Generation of neurons</b> |                                                                   |
| <b>Gene Symbol</b>           | <b>Name Gene</b>                                                  |
| ATP2B2                       | ATPase plasma membrane Ca <sup>2+</sup> transporting 2            |
| DTX1                         | deltex 1                                                          |
| GDNF                         | glial cell derived neurotrophic factor                            |
| GLI2                         | GLI family zinc finger 2                                          |
| LMX1B                        | LIM homeobox transcription factor 1 beta                          |
| MAPT                         | microtubule associated protein tau                                |
| NF1                          | neurofibromin 1                                                   |
| NRCAM                        | neuronal cell adhesion molecule                                   |
| PAX2                         | paired box 2                                                      |
| ROBO1                        | roundabout guidance receptor 1                                    |
| ROBO2                        | roundabout guidance receptor 2                                    |
| S100B                        | S100 calcium binding protein B                                    |
| SHH                          | sonic hedgehog                                                    |
| SIAH1                        | siah E3 ubiquitin protein ligase 1                                |
| SLIT1                        | slit guidance ligand 1                                            |
| UBB                          | ubiquitin B                                                       |

|                               |                                                                              |
|-------------------------------|------------------------------------------------------------------------------|
| YWHAG                         | tyrosine 3-monooxygenase/tryptophan 5-monooxygenase activation protein gamma |
| LST1                          | leukocyte specific transcript 1                                              |
| NRP2                          | neuropilin 2                                                                 |
| NRP1                          | neuropilin 1                                                                 |
| BRSK2                         | BR serine/threonine kinase 2                                                 |
| SLIT2                         | slit guidance ligand 2                                                       |
| NRXN3                         | neurexin 3                                                                   |
| NRXN1                         | neurexin 1                                                                   |
| SPON2                         | spondin 2                                                                    |
| BAIAP2                        | BAI1 associated protein 2                                                    |
| POU6F2                        | POU class 6 homeobox 2                                                       |
| NTNG1                         | netrin G1                                                                    |
| NLGN1                         | neuroligin 1                                                                 |
| CYFIP1                        | cytoplasmic FMR1 interacting protein 1                                       |
| NPTN                          | neuroplastin                                                                 |
| TRAPPC4                       | trafficking protein particle complex 4                                       |
| MAP1S                         | microtubule associated protein 1S                                            |
| PARD3                         | par-3 family cell polarity regulator                                         |
| RTN4                          | reticulon 4                                                                  |
| AMIGO1                        | adhesion molecule with Ig-like domain 1                                      |
| LRRC4C                        | leucine rich repeat containing 4C                                            |
| PARD6B                        | par-6 family cell polarity regulator beta                                    |
| RTN4RL1                       | reticulon 4 receptor like 1                                                  |
| CNTN4                         | contactin 4                                                                  |
| MDGA2                         | MAM domain containing glycosylphosphatidylinositol anchor 2                  |
| MDGA1                         | MAM domain containing glycosylphosphatidylinositol anchor 1                  |
| RTN4RL2                       | reticulon 4 receptor-like 2                                                  |
| AGRN                          | agrin                                                                        |
| <b>Neuron differentiation</b> |                                                                              |
| <b>Gene Symbol</b>            | <b>Name Gene</b>                                                             |
| ATP2B2                        | ATPase plasma membrane Ca <sup>2+</sup> transporting 2                       |
| DTX1                          | deltex 1                                                                     |
| GDNF                          | glial cell derived neurotrophic factor                                       |
| GLI2                          | GLI family zinc finger 2                                                     |
| LMX1B                         | LIM homeobox transcription factor 1 beta                                     |
| MAPT                          | microtubule associated protein tau                                           |
| NRCAM                         | neuronal cell adhesion molecule                                              |
| PAX2                          | paired box 2                                                                 |
| ROBO1                         | roundabout guidance receptor 1                                               |
| ROBO2                         | roundabout guidance receptor 2                                               |
| S100B                         | S100 calcium binding protein B                                               |
| SHH                           | sonic hedgehog                                                               |
| SIAH1                         | siah E3 ubiquitin protein ligase 1                                           |
| SLIT1                         | slit guidance ligand 1                                                       |
| UBB                           | ubiquitin B                                                                  |
| YWHAG                         | tyrosine 3-monooxygenase/tryptophan 5-monooxygenase activation protein gamma |
| LST1                          | leukocyte specific transcript 1                                              |
| NRP2                          | neuropilin 2                                                                 |
| NRP1                          | neuropilin 1                                                                 |
| BRSK2                         | BR serine/threonine kinase 2                                                 |
| SLIT2                         | slit guidance ligand 2                                                       |
| NRXN3                         | neurexin 3                                                                   |
| NRXN1                         | neurexin 1                                                                   |
| SPON2                         | spondin 2                                                                    |
| BAIAP2                        | BAI1 associated protein 2                                                    |
| POU6F2                        | POU class 6 homeobox 2                                                       |

|                     |                                                                              |
|---------------------|------------------------------------------------------------------------------|
| NTNG1               | netrin G1                                                                    |
| NLGN1               | neuroligin 1                                                                 |
| CYFIP1              | cytoplasmic FMR1 interacting protein 1                                       |
| TRAPPC4             | trafficking protein particle complex 4                                       |
| MAP1S               | microtubule associated protein 1S                                            |
| PARD3               | par-3 family cell polarity regulator                                         |
| RTN4                | reticulon 4                                                                  |
| AMIGO1              | adhesion molecule with Ig-like domain 1                                      |
| LRRC4C              | leucine rich repeat containing 4C                                            |
| PARD6B              | par-6 family cell polarity regulator beta                                    |
| RTN4RL1             | reticulon 4 receptor like 1                                                  |
| CNTN4               | contactin 4                                                                  |
| MDGA2               | MAM domain containing glycosylphosphatidylinositol anchor 2                  |
| MDGA1               | MAM domain containing glycosylphosphatidylinositol anchor 1                  |
| RTN4RL2             | reticulon 4 receptor-like 2                                                  |
| AGRN                | agrin                                                                        |
| <b>Neurogenesis</b> |                                                                              |
| <b>Gene Symbol</b>  | <b>Name Gene</b>                                                             |
| ATP2B2              | ATPase plasma membrane Ca <sup>2+</sup> transporting 2                       |
| AZU1                | azurocidin 1                                                                 |
| CDK6                | cyclin-dependent kinase 6                                                    |
| DTX1                | deltex 1                                                                     |
| GDNF                | glial cell derived neurotrophic factor                                       |
| GLI2                | GLI family zinc finger 2                                                     |
| LMX1B               | LIM homeobox transcription factor 1 beta                                     |
| MAPT                | microtubule associated protein tau                                           |
| NF1                 | neurofibromin 1                                                              |
| NF2                 | neurofibromin 2 (merlin)                                                     |
| NRCAM               | neuronal cell adhesion molecule                                              |
| PAX2                | paired box 2                                                                 |
| ROBO1               | roundabout guidance receptor 1                                               |
| ROBO2               | roundabout guidance receptor 2                                               |
| S100B               | S100 calcium binding protein B                                               |
| SHH                 | sonic hedgehog                                                               |
| SIAH1               | siah E3 ubiquitin protein ligase 1                                           |
| SLIT1               | slit guidance ligand 1                                                       |
| UBB                 | ubiquitin B                                                                  |
| YWHAG               | tyrosine 3-monooxygenase/tryptophan 5-monooxygenase activation protein gamma |
| LST1                | leukocyte specific transcript 1                                              |
| NRP2                | neuropilin 2                                                                 |
| NRP1                | neuropilin 1                                                                 |
| EIF2B3              | eukaryotic translation initiation factor 2B subunit gamma                    |
| EIF2B2              | eukaryotic translation initiation factor 2B subunit beta                     |
| BRSK2               | BR serine/threonine kinase 2                                                 |
| SLIT2               | slit guidance ligand 2                                                       |
| NRXN3               | neurexin 3                                                                   |
| NRXN1               | neurexin 1                                                                   |
| SPON2               | spondin 2                                                                    |
| BAIAP2              | BAI1 associated protein 2                                                    |
| POU6F2              | POU class 6 homeobox 2                                                       |
| NTNG1               | netrin G1                                                                    |
| NLGN1               | neuroligin 1                                                                 |
| CYFIP1              | cytoplasmic FMR1 interacting protein 1                                       |
| NPTN                | neuroplastin                                                                 |
| TRAPPC4             | trafficking protein particle complex 4                                       |
| MAP1S               | microtubule associated protein 1S                                            |
| PARD3               | par-3 family cell polarity regulator                                         |

|                           |                                                             |
|---------------------------|-------------------------------------------------------------|
| RTN4                      | reticulon 4                                                 |
| AMIGO1                    | adhesion molecule with Ig-like domain 1                     |
| LRRC4C                    | leucine rich repeat containing 4C                           |
| PARD6B                    | par-6 family cell polarity regulator beta                   |
| RTN4RL1                   | reticulon 4 receptor like 1                                 |
| CNTN4                     | contactin 4                                                 |
| MDGA2                     | MAM domain containing glycosylphosphatidylinositol anchor 2 |
| MDGA1                     | MAM domain containing glycosylphosphatidylinositol anchor 1 |
| RTN4RL2                   | reticulon 4 receptor-like 2                                 |
| AGRN                      | agrin                                                       |
| <b>Neuron development</b> |                                                             |
| <b>Gene Symbol</b>        | <b>Name Gene</b>                                            |
| GDNF                      | glial cell derived neurotrophic factor                      |
| GLI2                      | GLI family zinc finger 2                                    |
| MAPT                      | microtubule associated protein tau                          |
| NRCAM                     | neuronal cell adhesion molecule                             |
| PAX2                      | paired box 2                                                |
| ROBO1                     | roundabout guidance receptor 1                              |
| ROBO2                     | roundabout guidance receptor 2                              |
| S100B                     | S100 calcium binding protein B                              |
| SHH                       | sonic hedgehog                                              |
| SIAH1                     | siah E3 ubiquitin protein ligase 1                          |
| SLIT1                     | slit guidance ligand 1                                      |
| LST1                      | leukocyte specific transcript 1                             |
| NRP2                      | neuropilin 2                                                |
| NRP1                      | neuropilin 1                                                |
| SLIT2                     | slit guidance ligand 2                                      |
| NRXN3                     | neurexin 3                                                  |
| NRXN1                     | neurexin 1                                                  |
| SPON2                     | spondin 2                                                   |
| BAIAP2                    | BAI1 associated protein 2                                   |
| NTNG1                     | netrin G1                                                   |
| CYFIP1                    | cytoplasmic FMR1 interacting protein 1                      |
| TRAPPC4                   | trafficking protein particle complex 4                      |
| MAP1S                     | microtubule associated protein 1S                           |
| PARD3                     | par-3 family cell polarity regulator                        |
| RTN4                      | reticulon 4                                                 |
| AMIGO1                    | adhesion molecule with Ig-like domain 1                     |
| LRRC4C                    | leucine rich repeat containing 4C                           |
| PARD6B                    | par-6 family cell polarity regulator beta                   |
| RTN4RL1                   | reticulon 4 receptor like 1                                 |
| CNTN4                     | contactin 4                                                 |
| RTN4RL2                   | reticulon 4 receptor-like 2                                 |
| AGRN                      | agrin                                                       |

**Table S3 - Gene collection of Persistent (cases) group**

| <b>Table S3 - Gene collection of Persistent group</b> |                                                                            |
|-------------------------------------------------------|----------------------------------------------------------------------------|
| <b>Biological Processes</b>                           |                                                                            |
| <b>Regulation molecular function</b>                  |                                                                            |
| <b>Gene Symbol</b>                                    | <b>Name Gene</b>                                                           |
| ABL2                                                  | ABL proto-oncogene 2, non-receptor tyrosine kinase                         |
| ADRA2A                                                | adrenoceptor alpha 2A                                                      |
| ADRB1                                                 | adrenoceptor beta 1                                                        |
| ANG                                                   | angiogenin                                                                 |
| APAF1                                                 | apoptotic peptidase activating factor 1                                    |
| APC                                                   | adenomatous polyposis coli                                                 |
| BIRC5                                                 | baculoviral IAP repeat containing 5                                        |
| BAK1                                                  | BCL2 antagonist/killer 1                                                   |
| CCND1                                                 | cyclin D1                                                                  |
| BCL2                                                  | B-cell CLL/lymphoma 2                                                      |
| BCL3                                                  | B-cell CLL/lymphoma 3                                                      |
| FOXL2                                                 | forkhead box L2                                                            |
| CALCA                                                 | calcitonin related polypeptide alpha                                       |
| CALCR                                                 | calcitonin receptor                                                        |
| CASP9                                                 | caspase 9                                                                  |
| CCKBR                                                 | cholecystokinin B receptor                                                 |
| CCND2                                                 | cyclin D2                                                                  |
| CCNG1                                                 | cyclin G1                                                                  |
| CD81                                                  | CD81 molecule                                                              |
| CDK7                                                  | cyclin-dependent kinase 7                                                  |
| CDKN1C                                                | cyclin-dependent kinase inhibitor 1C                                       |
| CDKN3                                                 | cyclin-dependent kinase inhibitor 3                                        |
| CHRM1                                                 | cholinergic receptor muscarinic 1                                          |
| CKS1B                                                 | CDC28 protein kinase regulatory subunit 1B                                 |
| CRHR1                                                 | corticotropin releasing hormone receptor 1                                 |
| DAXX                                                  | death-domain associated protein                                            |
| GADD45A                                               | growth arrest and DNA damage inducible alpha                               |
| DHCR24                                                | 24-dehydrocholesterol reductase                                            |
| DUSP2                                                 | dual specificity phosphatase 2                                             |
| DUSP6                                                 | dual specificity phosphatase 6                                             |
| EDNRB                                                 | endothelin receptor type B                                                 |
| EGF                                                   | epidermal growth factor                                                    |
| EGFR                                                  | epidermal growth factor receptor                                           |
| EP300                                                 | E1A binding protein p300                                                   |
| GABBR1                                                | gamma-aminobutyric acid type B receptor subunit 1                          |
| GALR1                                                 | galanin receptor 1                                                         |
| GHRHR                                                 | growth hormone releasing hormone receptor                                  |
| GIPR                                                  | gastric inhibitory polypeptide receptor                                    |
| GNA15                                                 | G protein subunit alpha 15                                                 |
| GNAI2                                                 | G protein subunit alpha i2                                                 |
| GNAS                                                  | GNAS complex locus                                                         |
| GPS1                                                  | G protein pathway suppressor 1                                             |
| GRM2                                                  | glutamate metabotropic receptor 2                                          |
| GRM3                                                  | glutamate metabotropic receptor 3                                          |
| GRM4                                                  | glutamate metabotropic receptor 4                                          |
| GTF2H1                                                | general transcription factor IIH subunit 1                                 |
| HIP1                                                  | huntingtin interacting protein 1                                           |
| ID2                                                   | inhibitor of DNA binding 2, HLH protein                                    |
| ID3                                                   | inhibitor of DNA binding 3, HLH protein                                    |
| IKKBK                                                 | inhibitor of kappa light polypeptide gene enhancer in B-cells, kinase beta |

|          |                                                                       |
|----------|-----------------------------------------------------------------------|
| LCK      | LCK proto-oncogene, Src family tyrosine kinase                        |
| SMAD3    | SMAD family member 3                                                  |
| MAP3K5   | mitogen-activated protein kinase kinase kinase 5                      |
| MAP3K10  | mitogen-activated protein kinase kinase kinase 10                     |
| NF1      | neurofibromin 1                                                       |
| PAK1     | p21 (RAC1) activated kinase 1                                         |
| PAK2     | p21 (RAC1) activated kinase 2                                         |
| PEX14    | peroxisomal biogenesis factor 14                                      |
| PIK3CB   | phosphatidylinositol-4,5-bisphosphate 3-kinase catalytic subunit beta |
| PMAIP1   | phorbol-12-myristate-13-acetate-induced protein 1                     |
| PRLR     | prolactin receptor                                                    |
| PTEN     | phosphatase and tensin homolog                                        |
| PTPRC    | protein tyrosine phosphatase, receptor type C                         |
| RB1      | retinoblastoma 1                                                      |
| RGS3     | regulator of G-protein signaling 3                                    |
| SHC1     | SHC adaptor protein 1                                                 |
| TARBP2   | TARBP2, RISC loading complex RNA binding subunit                      |
| TGFA     | transforming growth factor alpha                                      |
| TGFB1    | transforming growth factor beta 1                                     |
| TNF      | tumor necrosis factor                                                 |
| TNNT2    | troponin T2, cardiac type                                             |
| TPD52L1  | tumor protein D52-like 1                                              |
| TRAF6    | TNF receptor associated factor 6                                      |
| TSC1     | tuberous sclerosis 1                                                  |
| MADD     | MAP kinase activating death domain                                    |
| PKMYT1   | protein kinase, membrane associated tyrosine/threonine 1              |
| CCNE2    | cyclin E2                                                             |
| LPAR2    | lysophosphatidic acid receptor 2                                      |
| MAP3K13  | mitogen-activated protein kinase kinase kinase 13                     |
| PICK1    | protein interacting with PRKCA 1                                      |
| GABBR2   | gamma-aminobutyric acid type B receptor subunit 2                     |
| CASP8AP2 | caspase 8 associated protein 2                                        |
| DNAJB6   | DnaJ heat shock protein family (Hsp40) member B6                      |
| HIPK3    | homeodomain interacting protein kinase 3                              |
| TRIB1    | tribbles pseudokinase 1                                               |
| NMUR1    | neuromedin U receptor 1                                               |
| TAB1     | TGF-beta activated kinase 1/MAP3K7 binding protein 1                  |
| CAP1     | CAP, adenylate cyclase-associated protein 1 (yeast)                   |
| CAMKK2   | calcium/calmodulin-dependent protein kinase kinase 2                  |
| GADD45G  | growth arrest and DNA damage inducible gamma                          |
| RALBP1   | ralA binding protein 1                                                |
| ADAP1    | ArfGAP with dual PH domains 1                                         |
| CDC37    | cell division cycle 37                                                |
| ERC1     | ELKS/RAB6-interacting/CAST family member 1                            |
| CBLC     | Cbl proto-oncogene C                                                  |
| FBXO5    | F-box protein 5                                                       |
| LATS2    | large tumor suppressor kinase 2                                       |
| SERTAD1  | SERTA domain containing 1                                             |
| MDFIC    | MyoD family inhibitor domain containing                               |
| MBIP     | MAP3K12 binding inhibitory protein 1                                  |
| ZAK      | sterile alpha motif and leucine zipper containing kinase AZK          |
| EGLN1    | egl-9 family hypoxia inducible factor 1                               |
| IFT57    | intraflagellar transport 57                                           |
| CAND1    | cullin associated and neddylation dissociated 1                       |
| PSENEN   | presenilin enhancer gamma-secretase subunit                           |
| PARD3    | par-3 family cell polarity regulator                                  |
| PRMT8    | protein arginine methyltransferase 8                                  |
| LTB4R2   | leukotriene B4 receptor 2                                             |

|                            |                                                                    |
|----------------------------|--------------------------------------------------------------------|
| BCCIP                      | BRCA2 and CDKN1A interacting protein                               |
| DUSP22                     | dual specificity phosphatase 22                                    |
| ALS2                       | ALS2, alsin Rho guanine nucleotide exchange factor                 |
| SIGIRR                     | single immunoglobulin and toll-interleukin 1 receptor (TIR) domain |
| NARFL                      | nuclear prelamin A recognition factor like                         |
| PIF1                       | PIF1 5'-to-3' DNA helicase                                         |
| CDK5RAP3                   | CDK5 regulatory subunit associated protein 3                       |
| CARD11                     | caspase recruitment domain family member 11                        |
| ATPIF1                     | ATPase inhibitory factor 1                                         |
| NLRP3                      | NLR family, pyrin domain containing 3                              |
| ARAP1                      | ArfGAP with RhoGAP domain, ankyrin repeat and PH domain 1          |
| HEXIM2                     | hexamethylene bisacetamide inducible 2                             |
| COMMD7                     | COMM domain containing 7                                           |
| AIFM3                      | apoptosis inducing factor, mitochondria associated 3               |
| NFAM1                      | NFAT activating protein with ITAM motif 1                          |
| FGD5                       | FYVE, RhoGEF and PH domain containing 5                            |
| SPRED2                     | sprouty related EVH1 domain containing 2                           |
| ARHGAP27                   | Rho GTPase activating protein 27                                   |
| FGD2                       | FYVE, RhoGEF and PH domain containing 2                            |
| CRIPAK                     | cysteine rich PAK1 inhibitor                                       |
| SERINC2                    | serine incorporator 2                                              |
| <b>Signal transduction</b> |                                                                    |
| <b>Gene Symbol</b>         | <b>Name Gene</b>                                                   |
| ABL2                       | ABL proto-oncogene 2, non-receptor tyrosine kinase                 |
| ABR                        | active BCR-related                                                 |
| ACTL6A                     | actin like 6A                                                      |
| ACVR1                      | activin A receptor type 1                                          |
| ACVR2A                     | activin A receptor type 2A                                         |
| ACVR2B                     | activin A receptor type 2B                                         |
| ACVRL1                     | activin A receptor like type 1                                     |
| ADCYAP1                    | adenylate cyclase activating polypeptide 1                         |
| ADM                        | adrenomedullin                                                     |
| ADORA1                     | adenosine A1 receptor                                              |
| ADORA3                     | adenosine A3 receptor                                              |
| ADRA1A                     | adrenoceptor alpha 1A                                              |
| ADRA2A                     | adrenoceptor alpha 2A                                              |
| ADRA2C                     | adrenoceptor alpha 2C                                              |
| ADRB1                      | adrenoceptor beta 1                                                |
| GRK2                       | G protein-coupled receptor kinase 2                                |
| GRK3                       | G protein-coupled receptor kinase 3                                |
| AKT1                       | AKT serine/threonine kinase 1                                      |
| ALCAM                      | activated leukocyte cell adhesion molecule                         |
| AMHR2                      | anti-Mullerian hormone receptor type 2                             |
| ANG                        | angiogenin                                                         |
| ANXA1                      | annexin A1                                                         |
| ANXA3                      | annexin A3                                                         |
| ANXA4                      | annexin A4                                                         |
| ANXA5                      | annexin A5                                                         |
| APAF1                      | apoptotic peptidase activating factor 1                            |
| BIRC3                      | baculoviral IAP repeat containing 3                                |
| FASLG                      | Fas ligand                                                         |
| RHOA                       | ras homolog family member A                                        |
| RHOB                       | ras homolog family member B                                        |
| RHOG                       | ras homolog family member G                                        |
| ARHGAP1                    | Rho GTPase activating protein 1                                    |
| ARHGAP5                    | Rho GTPase activating protein 5                                    |
| ARHGDI1                    | Rho GDP dissociation inhibitor alpha                               |





|         |                                                       |
|---------|-------------------------------------------------------|
| CRH     | corticotropin releasing hormone                       |
| CRHBP   | corticotropin releasing hormone binding protein       |
| CRHR1   | corticotropin releasing hormone receptor 1            |
| CRHR2   | corticotropin releasing hormone receptor 2            |
| CRKL    | v-crk avian sarcoma virus CT10 oncogene homolog-like  |
| MAPK14  | mitogen-activated protein kinase 14                   |
| CSNK1D  | casein kinase 1 delta                                 |
| CSNK1E  | casein kinase 1 epsilon                               |
| CSNK1G2 | casein kinase 1 gamma 2                               |
| CSNK2A2 | casein kinase 2 alpha 2                               |
| CSNK2B  | casein kinase 2 beta                                  |
| CTNND2  | catenin delta 2                                       |
| CX3CR1  | C-X3-C motif chemokine receptor 1                     |
| DGKA    | diacylglycerol kinase alpha                           |
| DAPK1   | death associated protein kinase 1                     |
| DAPK3   | death-associated protein kinase 3                     |
| DAXX    | death-domain associated protein                       |
| DFFA    | DNA fragmentation factor subunit alpha                |
| DFFB    | DNA fragmentation factor subunit beta                 |
| DLG4    | discs large homolog 4                                 |
| DOCK1   | dedicator of cytokinesis 1                            |
| DPYSL2  | dihydropyrimidinase like 2                            |
| DRD1    | dopamine receptor D1                                  |
| DRD2    | dopamine receptor D2                                  |
| DRD4    | dopamine receptor D4                                  |
| DRD5    | dopamine receptor D5                                  |
| RCAN1   | regulator of calcineurin 1                            |
| DTNA    | dystrobrevin alpha                                    |
| DTX1    | deltex 1                                              |
| DUSP2   | dual specificity phosphatase 2                        |
| DUSP4   | dual specificity phosphatase 4                        |
| DUSP6   | dual specificity phosphatase 6                        |
| ECT2    | epithelial cell transforming 2                        |
| S1PR1   | sphingosine-1-phosphate receptor 1                    |
| EDN3    | endothelin 3                                          |
| EDNRB   | endothelin receptor type B                            |
| EEF1D   | eukaryotic translation elongation factor 1 delta      |
| EGF     | epidermal growth factor                               |
| EGFR    | epidermal growth factor receptor                      |
| EPHA2   | EPH receptor A2                                       |
| ELK3    | ELK3, ETS transcription factor                        |
| MARK2   | microtubule affinity regulating kinase 2              |
| EPAS1   | endothelial PAS domain protein 1                      |
| EPHA1   | EPH receptor A1                                       |
| EPHA4   | EPH receptor A4                                       |
| EPHB1   | EPH receptor B1                                       |
| EPHB3   | EPH receptor B3                                       |
| STX2    | syntaxin 2                                            |
| EPS8    | epidermal growth factor receptor pathway substrate 8  |
| EPS15   | epidermal growth factor receptor pathway substrate 15 |
| NR2F6   | nuclear receptor subfamily 2 group F member 6         |
| ERBB2   | erb-b2 receptor tyrosine kinase 2                     |
| ERBB4   | erb-b2 receptor tyrosine kinase 4                     |
| ESR1    | estrogen receptor 1                                   |
| EXT1    | exostosin glycosyltransferase 1                       |
| EXT2    | exostosin glycosyltransferase 2                       |
| F2RL1   | F2R like trypsin receptor 1                           |
| PTK2B   | protein tyrosine kinase 2 beta                        |

|         |                                                        |
|---------|--------------------------------------------------------|
| FGF5    | fibroblast growth factor 5                             |
| FGF9    | fibroblast growth factor 9                             |
| FGF11   | fibroblast growth factor 11                            |
| FGF12   | fibroblast growth factor 12                            |
| FGF14   | fibroblast growth factor 14                            |
| FGFR1   | fibroblast growth factor receptor 1                    |
| FGFR3   | fibroblast growth factor receptor 3                    |
| FGFR4   | fibroblast growth factor receptor 4                    |
| FOXC2   | forkhead box C2                                        |
| FLT3LG  | fms related tyrosine kinase 3 ligand                   |
| FLT4    | fms related tyrosine kinase 4                          |
| FPR2    | formyl peptide receptor 2                              |
| FPR3    | formyl peptide receptor 3                              |
| FYB     | FYN binding protein                                    |
| FYN     | FYN proto-oncogene, Src family tyrosine kinase         |
| IFI6    | interferon alpha inducible protein 6                   |
| GABBR1  | gamma-aminobutyric acid type B receptor subunit 1      |
| GABRA1  | gamma-aminobutyric acid type A receptor alpha1 subunit |
| GABRB1  | gamma-aminobutyric acid type A receptor beta1 subunit  |
| GABRB3  | gamma-aminobutyric acid type A receptor beta3 subunit  |
| GABRR1  | gamma-aminobutyric acid type A receptor rho1 subunit   |
| GABRR2  | gamma-aminobutyric acid type A receptor rho2 subunit   |
| GALR1   | galanin receptor 1                                     |
| GDI2    | GDP dissociation inhibitor 2                           |
| GDNF    | glial cell derived neurotrophic factor                 |
| GHRHR   | growth hormone releasing hormone receptor              |
| GHSR    | growth hormone secretagogue receptor                   |
| GIPR    | gastric inhibitory polypeptide receptor                |
| GLI2    | GLI family zinc finger 2                               |
| GLI3    | GLI family zinc finger 3                               |
| GLRA1   | glycine receptor alpha 1                               |
| GNA11   | G protein subunit alpha 11                             |
| GNA12   | G protein subunit alpha 12                             |
| GNA15   | G protein subunit alpha 15                             |
| GNAI2   | G protein subunit alpha i2                             |
| GNAI3   | G protein subunit alpha i3                             |
| GNAL    | G protein subunit alpha L                              |
| GNAS    | GNAS complex locus                                     |
| GNB1    | G protein subunit beta 1                               |
| GNG4    | G protein subunit gamma 4                              |
| GNG7    | G protein subunit gamma 7                              |
| GNL1    | G protein nucleolar 1 (putative)                       |
| SFN     | stratifin                                              |
| GP1BA   | glycoprotein Ib platelet alpha subunit                 |
| GPR1    | G protein-coupled receptor 1                           |
| CCR10   | C-C motif chemokine receptor 10                        |
| GPR19   | G protein-coupled receptor 19                          |
| GPR20   | G protein-coupled receptor 20                          |
| GPR27   | G protein-coupled receptor 27                          |
| GRK5    | G protein-coupled receptor kinase 5                    |
| MKMK2   | MAP kinase interacting serine/threonine kinase 2       |
| GPS1    | G protein pathway suppressor 1                         |
| GRB2    | growth factor receptor bound protein 2                 |
| GRB7    | growth factor receptor bound protein 7                 |
| GRB10   | growth factor receptor bound protein 10                |
| RAPGEF1 | Rap guanine nucleotide exchange factor 1               |
| GRIA2   | glutamate ionotropic receptor AMPA type subunit 2      |
| GRIA4   | glutamate ionotropic receptor AMPA type subunit 4      |

|         |                                                                |
|---------|----------------------------------------------------------------|
| GRID2   | glutamate ionotropic receptor delta type subunit 2             |
| GRIK2   | glutamate ionotropic receptor kainate type subunit 2           |
| GRIK4   | glutamate ionotropic receptor kainate type subunit 4           |
| GRIN2A  | glutamate ionotropic receptor NMDA type subunit 2A             |
| GRIN2B  | glutamate ionotropic receptor NMDA type subunit 2B             |
| NR3C1   | nuclear receptor subfamily 3 group C member 1                  |
| GRM2    | glutamate metabotropic receptor 2                              |
| GRM3    | glutamate metabotropic receptor 3                              |
| GRM4    | glutamate metabotropic receptor 4                              |
| GRM6    | glutamate metabotropic receptor 6                              |
| GRM8    | glutamate metabotropic receptor 8                              |
| CXCL1   | C-X-C motif chemokine ligand 1                                 |
| GTF2I   | general transcription factor Iii                               |
| GUCY1A3 | guanylate cyclase 1, soluble, alpha 3                          |
| GUCY1B3 | guanylate cyclase 1, soluble, beta 3                           |
| GUCY2D  | guanylate cyclase 2D, retinal                                  |
| HCRTR2  | hypocretin receptor 2                                          |
| HIP1    | huntingtin interacting protein 1                               |
| HINT1   | histidine triad nucleotide binding protein 1                   |
| HMGB1   | high mobility group box 1                                      |
| NR4A1   | nuclear receptor subfamily 4 group A member 1                  |
| HNRNPK  | heterogeneous nuclear ribonucleoprotein K                      |
| HPGD    | hydroxyprostaglandin dehydrogenase 15-(NAD)                    |
| PRMT2   | protein arginine methyltransferase 2                           |
| PRMT1   | protein arginine methyltransferase 1                           |
| HTR1B   | 5-hydroxytryptamine receptor 1B                                |
| HTR2A   | 5-hydroxytryptamine receptor 2A                                |
| HTR5A   | 5-hydroxytryptamine receptor 5A                                |
| HTR6    | 5-hydroxytryptamine receptor 6                                 |
| HTR7    | 5-hydroxytryptamine receptor 7                                 |
| HUS1    | HUS1 checkpoint clamp component                                |
| IFNA2   | interferon, alpha 2                                            |
| IFNAR2  | interferon alpha and beta receptor subunit 2                   |
| IFNG    | interferon, gamma                                              |
| IFNGR1  | interferon gamma receptor 1                                    |
| IGF1R   | insulin like growth factor 1 receptor                          |
| IGF2R   | insulin like growth factor 2 receptor                          |
| IGFALS  | insulin like growth factor binding protein acid labile subunit |
| IGFBP1  | insulin like growth factor binding protein 1                   |
| IGFBP4  | insulin like growth factor binding protein 4                   |
| IL1B    | interleukin 1 beta                                             |
| IL5RA   | interleukin 5 receptor subunit alpha                           |
| IL12A   | interleukin 12A                                                |
| IL12RB1 | interleukin 12 receptor subunit beta 1                         |
| IL15    | interleukin 15                                                 |
| IL15RA  | interleukin 15 receptor subunit alpha                          |
| IMPA1   | inositol monophosphatase 1                                     |
| ING2    | inhibitor of growth family member 2                            |
| INHBA   | inhibin beta A                                                 |
| INPP4A  | inositol polyphosphate-4-phosphatase type I A                  |
| INPP5D  | inositol polyphosphate-5-phosphatase D                         |
| ITPKA   | inositol-trisphosphate 3-kinase A                              |
| ITPR2   | inositol 1,4,5-trisphosphate receptor type 2                   |
| ITPR3   | inositol 1,4,5-trisphosphate receptor type 3                   |
| JAK2    | Janus kinase 2                                                 |
| KIT     | KIT proto-oncogene receptor tyrosine kinase                    |
| STMN1   | stathmin 1                                                     |
| LCK     | LCK proto-oncogene, Src family tyrosine kinase                 |

|           |                                                                    |
|-----------|--------------------------------------------------------------------|
| LCP2      | lymphocyte cytosolic protein 2                                     |
| LETM1     | leucine zipper and EF-hand containing transmembrane protein 1      |
| LGALS1    | galectin 1                                                         |
| LIFR      | leukemia inhibitory factor receptor alpha                          |
| LTA       | lymphotoxin alpha                                                  |
| LTB       | lymphotoxin beta                                                   |
| LTBR      | lymphotoxin beta receptor                                          |
| SMAD1     | SMAD family member 1                                               |
| SMAD2     | SMAD family member 2                                               |
| SMAD3     | SMAD family member 3                                               |
| SMAD7     | SMAD family member 7                                               |
| MAL       | mal, T-cell differentiation protein                                |
| MARK1     | microtubule affinity regulating kinase 1                           |
| MAS1      | MAS1 proto-oncogene, G protein-coupled receptor                    |
| MC1R      | melanocortin 1 receptor                                            |
| MC2R      | melanocortin 2 receptor                                            |
| MC4R      | melanocortin 4 receptor                                            |
| MCC       | mutated in colorectal cancers                                      |
| ADAM11    | ADAM metallopeptidase domain 11                                    |
| MAP3K5    | mitogen-activated protein kinase kinase kinase 5                   |
| MGST2     | microsomal glutathione S-transferase 2                             |
| MAP3K10   | mitogen-activated protein kinase kinase kinase 10                  |
| NR3C2     | nuclear receptor subfamily 3 group C member 2                      |
| MPL       | MPL proto-oncogene, thrombopoietin receptor                        |
| MPP3      | membrane palmitoylated protein 3                                   |
| MST1R     | macrophage stimulating 1 receptor                                  |
| MTNR1A    | melatonin receptor 1A                                              |
| MYO6      | myosin VI                                                          |
| PPP1R12B  | protein phosphatase 1 regulatory subunit 12B                       |
| NBN       | nibrin                                                             |
| NEDD9     | neural precursor cell expressed, developmentally down-regulated 9  |
| NF1       | neurofibromin 1                                                    |
| NF2       | neurofibromin 2 (merlin)                                           |
| NFATC1    | nuclear factor of activated T-cells 1                              |
| NFKBIB    | NFKB inhibitor beta                                                |
| NMB       | neuromedin B                                                       |
| NOTCH1    | notch 1                                                            |
| NPR2      | natriuretic peptide receptor 2                                     |
| NPY1R     | neuropeptide Y receptor Y1                                         |
| NRGN      | neurogranin                                                        |
| NTF3      | neurotrophin 3                                                     |
| NTRK1     | neurotrophic receptor tyrosine kinase 1                            |
| NTRK2     | neurotrophic receptor tyrosine kinase 2                            |
| NTRK3     | neurotrophic receptor tyrosine kinase 3                            |
| ROR2      | receptor tyrosine kinase like orphan receptor 2                    |
| NTSR1     | neurotensin receptor 1 (high affinity)                             |
| TNFRSF11B | tumor necrosis factor receptor superfamily member 11b              |
| OPRK1     | opioid receptor kappa 1                                            |
| OPRL1     | opioid related nociceptin receptor 1                               |
| OPRM1     | opioid receptor mu 1                                               |
| OTX2      | orthodenticle homeobox 2                                           |
| OXT       | oxytocin/neurophysin I prepropeptide                               |
| P2RY1     | purinergic receptor P2Y1                                           |
| P2RY2     | purinergic receptor P2Y2                                           |
| P2RY6     | pyrimidinergic receptor P2Y6                                       |
| PAFAH1B1  | platelet activating factor acetylhydrolase 1b regulatory subunit 1 |
| PAK1      | p21 (RAC1) activated kinase 1                                      |
| PAK2      | p21 (RAC1) activated kinase 2                                      |

|         |                                                                                         |
|---------|-----------------------------------------------------------------------------------------|
| PDE9A   | phosphodiesterase 9A                                                                    |
| PDGFA   | platelet derived growth factor subunit A                                                |
| PDGFRA  | platelet derived growth factor receptor alpha                                           |
| PDGFRB  | platelet derived growth factor receptor beta                                            |
| PDK1    | pyruvate dehydrogenase kinase 1                                                         |
| ENPP2   | ectonucleotide pyrophosphatase/phosphodiesterase 2                                      |
| PECAM1  | platelet and endothelial cell adhesion molecule 1                                       |
| PIK3CB  | phosphatidylinositol-4,5-bisphosphate 3-kinase catalytic subunit beta                   |
| PIK3CG  | phosphatidylinositol-4,5-bisphosphate 3-kinase catalytic subunit gamma                  |
| PIK3R1  | phosphoinositide-3-kinase regulatory subunit 1                                          |
| PLA2G1B | phospholipase A2 group IB                                                               |
| PLD1    | phospholipase D1                                                                        |
| PMAIP1  | phorbol-12-myristate-13-acetate-induced protein 1                                       |
| POMC    | proopiomelanocortin                                                                     |
| PPARG   | peroxisome proliferator activated receptor gamma                                        |
| PPP5C   | protein phosphatase 5 catalytic subunit                                                 |
| PRKAA2  | protein kinase AMP-activated catalytic subunit alpha 2                                  |
| PRKAB2  | protein kinase AMP-activated non-catalytic subunit beta 2                               |
| PRKACB  | protein kinase cAMP-activated catalytic subunit beta                                    |
| PRKAG1  | protein kinase AMP-activated non-catalytic subunit gamma 1                              |
| PRKAR2B | protein kinase cAMP-dependent type II regulatory subunit beta                           |
| PKN2    | protein kinase N2                                                                       |
| PRKG1   | protein kinase, cGMP-dependent, type I                                                  |
| MAPK1   | mitogen-activated protein kinase 1                                                      |
| MAPK10  | mitogen-activated protein kinase 10                                                     |
| MAP2K5  | mitogen-activated protein kinase kinase 5                                               |
| THAP12  | THAP domain containing 12                                                               |
| PRL     | prolactin                                                                               |
| PRLR    | prolactin receptor                                                                      |
| PSEN1   | presenilin 1                                                                            |
| PSEN2   | presenilin 2                                                                            |
| PTCH1   | patched 1                                                                               |
| PTEN    | phosphatase and tensin homolog                                                          |
| PTGER3  | prostaglandin E receptor 3                                                              |
| PTGER4  | prostaglandin E receptor 4                                                              |
| PTH     | parathyroid hormone                                                                     |
| PTH1R   | parathyroid hormone 1 receptor                                                          |
| PTK7    | protein tyrosine kinase 7 (inactive)                                                    |
| PTN     | pleiotrophin                                                                            |
| PTPN11  | protein tyrosine phosphatase, non-receptor type 11                                      |
| PTPRC   | protein tyrosine phosphatase, receptor type C                                           |
| PTPRD   | protein tyrosine phosphatase, receptor type D                                           |
| PTPRF   | protein tyrosine phosphatase, receptor type F                                           |
| PTPRG   | protein tyrosine phosphatase, receptor type G                                           |
| PTPRJ   | protein tyrosine phosphatase, receptor type J                                           |
| PWP2    | PWP2 periodic tryptophan protein homolog (yeast)                                        |
| MAP4K2  | mitogen-activated protein kinase kinase kinase kinase 2                                 |
| RAC1    | ras-related C3 botulinum toxin substrate 1 (rho family, small GTP binding protein Rac1) |
| RALB    | RALB Ras like proto-oncogene B                                                          |
| RAN     | RAN, member RAS oncogene family                                                         |
| RANBP1  | RAN binding protein 1                                                                   |
| RAP1A   | RAP1A, member of RAS oncogene family                                                    |
| RAP1GAP | RAP1 GTPase activating protein                                                          |
| RAP2A   | RAP2A, member of RAS oncogene family                                                    |
| RAP2B   | RAP2B, member of RAS oncogene family                                                    |
| RCVRN   | recoverin                                                                               |
| RELA    | RELA proto-oncogene, NF-kB subunit                                                      |

|         |                                                                 |
|---------|-----------------------------------------------------------------|
| RET     | ret proto-oncogene                                              |
| RGS2    | regulator of G-protein signaling 2                              |
| RGS3    | regulator of G-protein signaling 3                              |
| RGS4    | regulator of G-protein signaling 4                              |
| RGS12   | regulator of G-protein signaling 12                             |
| RIT1    | Ras like without CAAX 1                                         |
| RPS6KA1 | ribosomal protein S6 kinase A1                                  |
| RPS6KA2 | ribosomal protein S6 kinase A2                                  |
| RPS6KB2 | ribosomal protein S6 kinase B2                                  |
| RREB1   | ras responsive element binding protein 1                        |
| RTKN    | rhotekin                                                        |
| RSU1    | Ras suppressor protein 1                                        |
| S100A11 | S100 calcium binding protein A11                                |
| CXCL5   | C-X-C motif chemokine ligand 5                                  |
| SECTM1  | secreted and transmembrane 1                                    |
| MAP2K4  | mitogen-activated protein kinase kinase 4                       |
| SFRP1   | secreted frizzled related protein 1                             |
| SFRP4   | secreted frizzled related protein 4                             |
| SFRP5   | secreted frizzled related protein 5                             |
| SH3BP2  | SH3 domain binding protein 2                                    |
| SH3GL2  | SH3 domain containing GRB2 like 2, endophilin A1                |
| SH3GL3  | SH3 domain containing GRB2 like endophilin A3                   |
| SHB     | SH2 domain containing adaptor protein B                         |
| SHC1    | SHC adaptor protein 1                                           |
| SHH     | sonic hedgehog                                                  |
| SIAH2   | siah E3 ubiquitin protein ligase 2                              |
| SLC20A1 | solute carrier family 20 member 1                               |
| SMPD1   | sphingomyelin phosphodiesterase 1                               |
| SPG7    | SPG7, paraplegin matrix AAA peptidase subunit                   |
| SRC     | SRC proto-oncogene, non-receptor tyrosine kinase                |
| SRI     | sorcin                                                          |
| SRF     | serum response factor                                           |
| SRP72   | signal recognition particle 72kDa                               |
| SRPK1   | SRSF protein kinase 1                                           |
| SST     | somatostatin                                                    |
| SSTR1   | somatostatin receptor 1                                         |
| STC1    | stanniocalcin 1                                                 |
| STK4    | serine/threonine kinase 4                                       |
| XCL2    | X-C motif chemokine ligand 2                                    |
| TACR2   | tachykinin receptor 2                                           |
| TACR1   | tachykinin receptor 1                                           |
| TCF7L2  | transcription factor 7 like 2                                   |
| NR2F2   | nuclear receptor subfamily 2 group F member 2                   |
| TGFA    | transforming growth factor alpha                                |
| TGFB1   | transforming growth factor beta 1                               |
| TGFB3   | transforming growth factor beta 3                               |
| TGFBR3  | transforming growth factor beta receptor 3                      |
| KLF10   | Kruppel-like factor 10                                          |
| TIE1    | tyrosine kinase with immunoglobulin like and EGF like domains 1 |
| TLE2    | transducin like enhancer of split 2                             |
| TLE3    | transducin like enhancer of split 3                             |
| TLR3    | toll like receptor 3                                            |
| TNF     | tumor necrosis factor                                           |
| TNFAIP6 | TNF alpha induced protein 6                                     |
| TOP2A   | topoisomerase (DNA) II alpha                                    |
| TP53BP2 | tumor protein p53 binding protein 2                             |
| TP73    | tumor protein p73                                               |
| TPD52L1 | tumor protein D52-like 1                                        |

|           |                                                                             |
|-----------|-----------------------------------------------------------------------------|
| TRAF3     | TNF receptor associated factor 3                                            |
| TRAF5     | TNF receptor associated factor 5                                            |
| TRAF6     | TNF receptor associated factor 6                                            |
| TRIO      | trio Rho guanine nucleotide exchange factor                                 |
| TSC1      | tuberous sclerosis 1                                                        |
| TYRO3     | TYRO3 protein tyrosine kinase                                               |
| VDAC1     | voltage dependent anion channel 1                                           |
| VEGFA     | vascular endothelial growth factor A                                        |
| VEGFB     | vascular endothelial growth factor B                                        |
| VIPR1     | vasoactive intestinal peptide receptor 1                                    |
| VIPR2     | vasoactive intestinal peptide receptor 2                                    |
| TRPV1     | transient receptor potential cation channel subfamily V member 1            |
| WNT5A     | Wnt family member 5A                                                        |
| YWHAH     | tyrosine 3-monooxygenase/tryptophan 5-monooxygenase activation protein eta  |
| YWHAZ     | tyrosine 3-monooxygenase/tryptophan 5-monooxygenase activation protein zeta |
| ZIC1      | Zic family member 1                                                         |
| CXCR4     | C-X-C motif chemokine receptor 4                                            |
| MAPKAPK3  | mitogen-activated protein kinase-activated protein kinase 3                 |
| NR4A3     | nuclear receptor subfamily 4 group A member 3                               |
| GPR68     | G protein-coupled receptor 68                                               |
| ARID1A    | AT-rich interaction domain 1A                                               |
| TRRAP     | transformation/transcription domain associated protein                      |
| AXIN2     | axin 2                                                                      |
| PIP5K1A   | phosphatidylinositol-4-phosphate 5-kinase type 1 alpha                      |
| PIP4K2B   | phosphatidylinositol-5-phosphate 4-kinase type 2 beta                       |
| ULK1      | unc-51 like autophagy activating kinase 1                                   |
| BCAR3     | breast cancer anti-estrogen resistance 3                                    |
| STK24     | serine/threonine kinase 24                                                  |
| NSMAF     | neutral sphingomyelinase activation associated factor                       |
| RGS5      | regulator of G-protein signaling 5                                          |
| MAP4K3    | mitogen-activated protein kinase kinase kinase kinase 3                     |
| PPFIA1    | PTPRF interacting protein alpha 1                                           |
| PIK3R3    | phosphoinositide-3-kinase regulatory subunit 3                              |
| CNTNAP1   | contactin associated protein 1                                              |
| LGR5      | leucine-rich repeat containing G protein-coupled receptor 5                 |
| MADD      | MAP kinase activating death domain                                          |
| MKNK1     | MAP kinase interacting serine/threonine kinase 1                            |
| RGS20     | regulator of G-protein signaling 20                                         |
| STC2      | stanniocalcin 2                                                             |
| SKAP1     | src kinase associated phosphoprotein 1                                      |
| IRS2      | insulin receptor substrate 2                                                |
| TRADD     | TNFRSF1A associated via death domain                                        |
| TNFRSF25  | tumor necrosis factor receptor superfamily member 25                        |
| RIPK1     | receptor interacting serine/threonine kinase 1                              |
| TNFSF14   | tumor necrosis factor superfamily member 14                                 |
| TNFSF9    | tumor necrosis factor superfamily member 9                                  |
| RIPK2     | receptor interacting serine/threonine kinase 2                              |
| FADD      | Fas associated via death domain                                             |
| TNFRSF18  | tumor necrosis factor receptor superfamily member 18                        |
| RGS9      | regulator of G-protein signaling 9                                          |
| TNFRSF11A | tumor necrosis factor receptor superfamily member 11a                       |
| TNFRSF10D | tumor necrosis factor receptor superfamily member 10d                       |
| TNFRSF10C | tumor necrosis factor receptor superfamily member 10c                       |
| TNFRSF10B | tumor necrosis factor receptor superfamily member 10b                       |
| IL18RAP   | interleukin 18 receptor accessory protein                                   |
| GALR2     | galanin receptor 2                                                          |
| FGF18     | fibroblast growth factor 18                                                 |
| INPP4B    | inositol polyphosphate-4-phosphatase type II B                              |



|           |                                                                       |
|-----------|-----------------------------------------------------------------------|
| NRP1      | neuropilin 1                                                          |
| TMEM11    | transmembrane protein 11                                              |
| WISP1     | WNT1 inducible signaling pathway protein 1                            |
| NR1H2     | nuclear receptor subfamily 1 group I member 2                         |
| ARHGEF7   | Rho guanine nucleotide exchange factor 7                              |
| SPHK1     | sphingosine kinase 1                                                  |
| SQSTM1    | sequestosome 1                                                        |
| BUD31     | BUD31 homolog                                                         |
| CACNA1I   | calcium voltage-gated channel subunit alpha1 I                        |
| FOXH1     | forkhead box H1                                                       |
| SKAP2     | src kinase associated phosphoprotein 2                                |
| BTRC      | beta-transducin repeat containing E3 ubiquitin protein ligase         |
| RPS6KA4   | ribosomal protein S6 kinase A4                                        |
| TNFSF18   | tumor necrosis factor superfamily member 18                           |
| KALRN     | kalirin, RhoGEF kinase                                                |
| CDKL2     | cyclin dependent kinase like 2                                        |
| F2RL3     | F2R like thrombin/trypsin receptor 3                                  |
| SOCS3     | suppressor of cytokine signaling 3                                    |
| ARTN      | artemin                                                               |
| PSTPIP1   | proline-serine-threonine phosphatase interacting protein 1            |
| NMI       | N-myc and STAT interactor                                             |
| MTA1      | metastasis associated 1                                               |
| SMC3      | structural maintenance of chromosomes 3                               |
| HGS       | hepatocyte growth factor-regulated tyrosine kinase substrate          |
| LPAR2     | lysophosphatidic acid receptor 2                                      |
| MAP3K13   | mitogen-activated protein kinase kinase kinase 13                     |
| VAPB      | VAMP (vesicle-associated membrane protein)-associated protein B and C |
| VAPA      | VAMP associated protein A                                             |
| MAGI1     | membrane associated guanylate kinase, WW and PDZ domain containing 1  |
| CD83      | CD83 molecule                                                         |
| TRIP10    | thyroid hormone receptor interactor 10                                |
| GLP2R     | glucagon like peptide 2 receptor                                      |
| CD101     | CD101 molecule                                                        |
| ECEL1     | endothelin converting enzyme-like 1                                   |
| NCR2      | natural cytotoxicity triggering receptor 2                            |
| MED17     | mediator complex subunit 17                                           |
| MAP4K4    | mitogen-activated protein kinase kinase kinase kinase 4               |
| HOMER3    | homer scaffolding protein 3                                           |
| HOMER2    | homer scaffolding protein 2                                           |
| RASAL2    | RAS protein activator like 2                                          |
| PICK1     | protein interacting with PRKCA 1                                      |
| IL27RA    | interleukin 27 receptor subunit alpha                                 |
| MAPK8IP1  | mitogen-activated protein kinase 8 interacting protein 1              |
| ADAMTS1   | ADAM metalloproteinase with thrombospondin type 1 motif 1             |
| BCAR1     | BCAR1, Cas family scaffolding protein                                 |
| GABBR2    | gamma-aminobutyric acid type B receptor subunit 2                     |
| CDC42BPB  | CDC42 binding protein kinase beta                                     |
| AKAP12    | A-kinase anchoring protein 12                                         |
| SMAD5-AS1 | SMAD5 antisense RNA 1                                                 |
| RNF14     | ring finger protein 14                                                |
| RIN1      | Ras and Rab interactor 1                                              |
| CEP57     | centrosomal protein 57                                                |
| MAML1     | mastermind like transcriptional coactivator 1                         |
| GIT2      | GIT ArfGAP 2                                                          |
| ELMO1     | engulfment and cell motility 1                                        |
| MED24     | mediator complex subunit 24                                           |
| TLK1      | tousled like kinase 1                                                 |
| MFN2      | mitofusin 2                                                           |

|          |                                                                                 |
|----------|---------------------------------------------------------------------------------|
| OXSRI    | oxidative stress responsive 1                                                   |
| MED13    | mediator complex subunit 13                                                     |
| NR1H4    | nuclear receptor subfamily 1 group H member 4                                   |
| CASP8AP2 | caspase 8 associated protein 2                                                  |
| AKT3     | AKT serine/threonine kinase 3                                                   |
| ABI1     | abl interactor 1                                                                |
| TANK     | TRAF family member associated NFKB activator                                    |
| BCL2L10  | BCL2 like 10                                                                    |
| MED16    | mediator complex subunit 16                                                     |
| SH2D3C   | SH2 domain containing 3C                                                        |
| DNM1L    | dynamamin 1-like                                                                |
| PTPRU    | protein tyrosine phosphatase, receptor type U                                   |
| SGK2     | SGK2, serine/threonine kinase 2                                                 |
| NAMPT    | nicotinamide phosphoribosyltransferase                                          |
| WASF2    | WAS protein family member 2                                                     |
| TNK2     | tyrosine kinase non receptor 2                                                  |
| CNKSR1   | connector enhancer of kinase suppressor of Ras 1                                |
| RAMP1    | receptor activity modifying protein 1                                           |
| AKAP8    | A-kinase anchoring protein 8                                                    |
| NET1     | neuroepithelial cell transforming 1                                             |
| APC2     | adenomatosis polyposis coli 2                                                   |
| PAK4     | p21 (RAC1) activated kinase 4                                                   |
| NMUR1    | neuromedin U receptor 1                                                         |
| CITED2   | Cbp/p300 interacting transactivator with Glu/Asp rich carboxy-terminal domain 2 |
| NOD1     | nucleotide binding oligomerization domain containing 1                          |
| DLC1     | DLC1 Rho GTPase activating protein                                              |
| TAB1     | TGF-beta activated kinase 1/MAP3K7 binding protein 1                            |
| BAIAP2   | BAI1 associated protein 2                                                       |
| MERTK    | MER proto-oncogene, tyrosine kinase                                             |
| TRIM38   | tripartite motif containing 38                                                  |
| CAP1     | CAP, adenylate cyclase-associated protein 1 (yeast)                             |
| STK25    | serine/threonine kinase 25                                                      |
| IPO8     | importin 8                                                                      |
| SORBS1   | sorbin and SH3 domain containing 1                                              |
| CDC42EP3 | CDC42 effector protein 3                                                        |
| STAMPB   | STAM binding protein                                                            |
| RASL10A  | RAS like family 10 member A                                                     |
| RGS14    | regulator of G-protein signaling 14                                             |
| CAMKK2   | calcium/calmodulin-dependent protein kinase kinase 2                            |
| KHDRBS1  | KH domain containing, RNA binding, signal transduction associated 1             |
| RRAGA    | Ras related GTP binding A                                                       |
| TNFSF13B | tumor necrosis factor superfamily member 13b                                    |
| PTGES3   | prostaglandin E synthase 3                                                      |
| GRAP     | GRB2-related adaptor protein                                                    |
| CHL1     | cell adhesion molecule L1 like                                                  |
| IQGAP2   | IQ motif containing GTPase activating protein 2                                 |
| FRS2     | fibroblast growth factor receptor substrate 2                                   |
| PPP1R17  | protein phosphatase 1 regulatory subunit 17                                     |
| CD3EAP   | CD3e molecule associated protein                                                |
| NMU      | neuromedin U                                                                    |
| RUNDC3A  | RUN domain containing 3A                                                        |
| BRD8     | bromodomain containing 8                                                        |
| GADD45G  | growth arrest and DNA damage inducible gamma                                    |
| RALBP1   | ralA binding protein 1                                                          |
| MAPRE2   | microtubule associated protein RP/EB family member 2                            |
| TLK2     | tousled like kinase 2                                                           |
| TMED1    | transmembrane p24 trafficking protein 1                                         |
| ADAP1    | ArfGAP with dual PH domains 1                                                   |

|           |                                                                                  |
|-----------|----------------------------------------------------------------------------------|
| RIPK3     | receptor interacting serine/threonine kinase 3                                   |
| RAPGEF4   | Rap guanine nucleotide exchange factor 4                                         |
| PRDM4     | PR domain 4                                                                      |
| PTPRT     | protein tyrosine phosphatase, receptor type T                                    |
| FAF1      | Fas associated factor 1                                                          |
| RASSF1    | Ras association domain family member 1                                           |
| CHEK2     | checkpoint kinase 2                                                              |
| AKAP10    | A-kinase anchoring protein 10                                                    |
| GPR176    | G protein-coupled receptor 176                                                   |
| GPR45     | G protein-coupled receptor 45                                                    |
| PARK7     | Parkinsonism associated deglycase                                                |
| ICK       | intestinal cell (MAK-like) kinase                                                |
| ATF6      | activating transcription factor 6                                                |
| SCAP      | SREBF chaperone                                                                  |
| MAST1     | microtubule associated serine/threonine kinase 1                                 |
| ACIN1     | apoptotic chromatin condensation inducer 1                                       |
| PLCH1     | phospholipase C eta 1                                                            |
| STK38L    | serine/threonine kinase 38 like                                                  |
| TNIK      | TRAF2 and NCK interacting kinase                                                 |
| ERC1      | ELKS/RAB6-interacting/CAST family member 1                                       |
| PEG10     | paternally expressed 10                                                          |
| TAB2      | TGF-beta activated kinase 1/MAP3K7 binding protein 2                             |
| MAPK8IP3  | mitogen-activated protein kinase 8 interacting protein 3                         |
| ZDHHC17   | zinc finger DHHC-type containing 17                                              |
| ITGB3BP   | integrin subunit beta 3 binding protein                                          |
| TNFRSF13B | tumor necrosis factor receptor superfamily member 13B                            |
| RBFOX2    | RNA binding protein, fox-1 homolog 2                                             |
| DDAH2     | dimethylarginine dimethylaminohydrolase 2                                        |
| LPAR3     | lysophosphatidic acid receptor 3                                                 |
| DDAH1     | dimethylarginine dimethylaminohydrolase 1                                        |
| OPN3      | opsin 3                                                                          |
| CLEC5A    | C-type lectin domain family 5 member A                                           |
| CORO1C    | coronin 1C                                                                       |
| DAPK2     | death-associated protein kinase 2                                                |
| CBLC      | Cbl proto-oncogene C                                                             |
| ARFIP2    | ADP ribosylation factor interacting protein 2                                    |
| APPL1     | adaptor protein, phosphotyrosine interacting with PH domain and leucine zipper 1 |
| FGF20     | fibroblast growth factor 20                                                      |
| SERGEF    | secretion regulating guanine nucleotide exchange factor                          |
| LATS2     | large tumor suppressor kinase 2                                                  |
| CIDEB     | cell death-inducing DFFA-like effector b                                         |
| SGSM3     | small G protein signaling modulator 3                                            |
| CECR2     | CECR2, histone acetyl-lysine reader                                              |
| GIT1      | GIT ArfGAP 1                                                                     |
| HIPK2     | homeodomain interacting protein kinase 2                                         |
| MED4      | mediator complex subunit 4                                                       |
| CNOT7     | CCR4-NOT transcription complex subunit 7                                         |
| TRHDE     | thyrotropin releasing hormone degrading enzyme                                   |
| MDFIC     | MyoD family inhibitor domain containing                                          |
| RHOD      | ras homolog family member D                                                      |
| HUNK      | hormonally up-regulated Neu-associated kinase                                    |
| KCNIP3    | potassium voltage-gated channel interacting protein 3                            |
| KCNIP2    | potassium voltage-gated channel interacting protein 2                            |
| KCNIP1    | potassium voltage-gated channel interacting protein 1                            |
| DUOX2     | dual oxidase 2                                                                   |
| IL20      | interleukin 20                                                                   |
| TAS2R1    | taste 2 receptor member 1                                                        |
| PDE11A    | phosphodiesterase 11A                                                            |

|           |                                                                                  |
|-----------|----------------------------------------------------------------------------------|
| SOST      | sclerostin                                                                       |
| NDUFA13   | NADH:ubiquinone oxidoreductase subunit A13                                       |
| UTP11     | UTP11, small subunit processome component homolog ( <i>S. cerevisiae</i> )       |
| PLCE1     | phospholipase C epsilon 1                                                        |
| GMIP      | GEM interacting protein                                                          |
| TAOK3     | TAO kinase 3                                                                     |
| UBR5      | ubiquitin protein ligase E3 component n-recognin 5                               |
| TRIAP1    | TP53 regulated inhibitor of apoptosis 1                                          |
| CXXC5     | CXXC finger protein 5                                                            |
| MBIP      | MAP3K12 binding inhibitory protein 1                                             |
| SUFU      | SUFU negative regulator of hedgehog signaling                                    |
| NLK       | nemo like kinase                                                                 |
| ZAK       | sterile alpha motif and leucine zipper containing kinase AZK                     |
| TREM1     | triggering receptor expressed on myeloid cells 1                                 |
| DLL4      | delta like canonical Notch ligand 4                                              |
| IFT57     | intraflagellar transport 57                                                      |
| ARHGEF10L | Rho guanine nucleotide exchange factor 10 like                                   |
| RIC8B     | RIC8 guanine nucleotide exchange factor B                                        |
| APPL2     | adaptor protein, phosphotyrosine interacting with PH domain and leucine zipper 2 |
| MAML3     | mastermind like transcriptional coactivator 3                                    |
| CDC42BPG  | CDC42 binding protein kinase gamma                                               |
| CDKN2AIP  | CDKN2A interacting protein                                                       |
| PSENEN    | presenilin enhancer gamma-secretase subunit                                      |
| GPRC5C    | G protein-coupled receptor class C group 5 member C                              |
| ERBIN     | erbB2 interacting protein                                                        |
| GNG12     | G protein subunit gamma 12                                                       |
| PARD3     | par-3 family cell polarity regulator                                             |
| LTB4R2    | leukotriene B4 receptor 2                                                        |
| CDC42SE1  | CDC42 small effector 1                                                           |
| DUSP22    | dual specificity phosphatase 22                                                  |
| OTUD7B    | OTU deubiquitinase 7B                                                            |
| CDC42SE2  | CDC42 small effector 2                                                           |
| CTNNBIP1  | catenin beta interacting protein 1                                               |
| SLC44A2   | solute carrier family 44 member 2                                                |
| SMURF1    | SMAD specific E3 ubiquitin protein ligase 1                                      |
| PLEKHG5   | pleckstrin homology and RhoGEF domain containing G5                              |
| ALS2      | ALS2, alsin Rho guanine nucleotide exchange factor                               |
| MIER1     | MIER1 transcriptional regulator                                                  |
| MARK4     | microtubule affinity regulating kinase 4                                         |
| SIGIRR    | single immunoglobulin and toll-interleukin 1 receptor (TIR) domain               |
| RINT1     | RAD50 interactor 1                                                               |
| MOAP1     | modulator of apoptosis 1                                                         |
| RRAGC     | Ras related GTP binding C                                                        |
| NOD2      | nucleotide binding oligomerization domain containing 2                           |
| ARAP3     | ArfGAP with RhoGAP domain, ankyrin repeat and PH domain 3                        |
| PINK1     | PTEN induced putative kinase 1                                                   |
| DDX54     | DEAD-box helicase 54                                                             |
| MUL1      | mitochondrial E3 ubiquitin protein ligase 1                                      |
| ADIPOR2   | adiponectin receptor 2                                                           |
| WLS       | wntless Wnt ligand secretion mediator                                            |
| PREX2     | phosphatidylinositol-3,4,5-trisphosphate dependent Rac exchange factor 2         |
| APOL3     | apolipoprotein L3                                                                |
| VOPP1     | vesicular, overexpressed in cancer, prosurvival protein 1                        |
| PPP1R1B   | protein phosphatase 1 regulatory inhibitor subunit 1B                            |
| SLA2      | Src-like-adaptor 2                                                               |
| TMEM101   | transmembrane protein 101                                                        |
| MAML2     | mastermind like transcriptional coactivator 2                                    |
| KIAA1804  | mixed lineage kinase 4                                                           |

|                                    |                                                              |
|------------------------------------|--------------------------------------------------------------|
| AFAP1L2                            | actin filament associated protein 1 like 2                   |
| DERL3                              | derlin 3                                                     |
| CLNK                               | cytokine dependent hematopoietic cell linker                 |
| ARAP1                              | ArfGAP with RhoGAP domain, ankyrin repeat and PH domain 1    |
| AGAP2                              | ArfGAP with GTPase domain, ankyrin repeat and PH domain 2    |
| PIGU                               | phosphatidylinositol glycan anchor biosynthesis class U      |
| IL31RA                             | interleukin 31 receptor A                                    |
| IRAK1BP1                           | interleukin 1 receptor associated kinase 1 binding protein 1 |
| MIB2                               | mindbomb E3 ubiquitin protein ligase 2                       |
| COMMD7                             | COMM domain containing 7                                     |
| SIK1                               | salt inducible kinase 1                                      |
| AIFM3                              | apoptosis inducing factor, mitochondria associated 3         |
| NFAM1                              | NFAT activating protein with ITAM motif 1                    |
| ROPN1B                             | rhophilin associated tail protein 1B                         |
| FGD5                               | FYVE, RhoGEF and PH domain containing 5                      |
| EID2                               | EP300 interacting inhibitor of differentiation 2             |
| NLRC3                              | NLR family, CARD domain containing 3                         |
| SPRED2                             | sprouty related EVH1 domain containing 2                     |
| ARHGAP27                           | Rho GTPase activating protein 27                             |
| FGD2                               | FYVE, RhoGEF and PH domain containing 2                      |
| RICTOR                             | RPTOR independent companion of MTOR complex 2                |
| CRIPAK                             | cysteine rich PAK1 inhibitor                                 |
| RGMB                               | repulsive guidance molecule family member b                  |
| AGRN                               | agrin                                                        |
| <b>Transcription DNA dependent</b> |                                                              |
| <b>Gene Symbol</b>                 | <b>Name Gene</b>                                             |
| ABCA2                              | ATP binding cassette subfamily A member 2                    |
| PARP1                              | poly(ADP-ribose) polymerase 1                                |
| AHR                                | aryl hydrocarbon receptor                                    |
| ANG                                | angiogenin                                                   |
| ARNTL                              | aryl hydrocarbon receptor nuclear translocator like          |
| ZFH3                               | zinc finger homeobox 3                                       |
| NKX3-2                             | NK3 homeobox 2                                               |
| BCL6                               | B-cell CLL/lymphoma 6                                        |
| PRDM1                              | PR domain 1                                                  |
| BMP2                               | bone morphogenetic protein 2                                 |
| BMP6                               | bone morphogenetic protein 6                                 |
| BRCA1                              | breast cancer 1                                              |
| BTF3                               | basic transcription factor 3                                 |
| CALR                               | calreticulin                                                 |
| RUNX1                              | runt related transcription factor 1                          |
| RUNX3                              | runt related transcription factor 3                          |
| CBFB                               | core-binding factor, beta subunit                            |
| CDK7                               | cyclin-dependent kinase 7                                    |
| CEBPA                              | CCAAT/enhancer binding protein alpha                         |
| CEBPB                              | CCAAT/enhancer binding protein beta                          |
| CHD3                               | chromodomain helicase DNA binding protein 3                  |
| FOXN3                              | forkhead box N3                                              |
| CREBBP                             | CREB binding protein                                         |
| CREM                               | cAMP responsive element modulator                            |
| NKX2-5                             | NK2 homeobox 5                                               |
| CUX1                               | cut like homeobox 1                                          |
| DAXX                               | death-domain associated protein                              |
| DBP                                | D-box binding PAR bZIP transcription factor                  |
| DNMT1                              | DNA (cytosine-5-)-methyltransferase 1                        |
| DTX1                               | deltex 1                                                     |
| E2F2                               | E2F transcription factor 2                                   |

|         |                                                                         |
|---------|-------------------------------------------------------------------------|
| E2F3    | E2F transcription factor 3                                              |
| ELAVL2  | ELAV like neuron-specific RNA binding protein 2                         |
| ELF2    | E74 like ETS transcription factor 2                                     |
| EPAS1   | endothelial PAS domain protein 1                                        |
| ERCC3   | excision repair cross-complementation group 3                           |
| ERCC6   | excision repair cross-complementation group 6                           |
| ERF     | ETS2 repressor factor                                                   |
| ESRRG   | estrogen related receptor gamma                                         |
| EZH2    | enhancer of zeste 2 polycomb repressive complex 2 subunit               |
| BPTF    | bromodomain PHD finger transcription factor                             |
| FOXF1   | forkhead box F1                                                         |
| FOXF2   | forkhead box F2                                                         |
| FOXE3   | forkhead box E3                                                         |
| FOXO1   | forkhead box O1                                                         |
| FOSL2   | FOS like 2, AP-1 transcription factor subunit                           |
| NR5A2   | nuclear receptor subfamily 5 group A member 2                           |
| NR5A1   | nuclear receptor subfamily 5 group A member 1                           |
| XRCC6   | X-ray repair complementing defective repair in Chinese hamster cells 6  |
| GATA2   | GATA binding protein 2                                                  |
| GATA3   | GATA binding protein 3                                                  |
| GATA4   | GATA binding protein 4                                                  |
| GATA6   | GATA binding protein 6                                                  |
| KAT2A   | lysine acetyltransferase 2A                                             |
| NR6A1   | nuclear receptor subfamily 6 group A member 1                           |
| GFI1    | growth factor independent 1 transcriptional repressor                   |
| GLI2    | GLI family zinc finger 2                                                |
| NR3C1   | nuclear receptor subfamily 3 group C member 1                           |
| GSC2    | goosecoid homeobox 2                                                    |
| GTF2B   | general transcription factor IIB                                        |
| GTF2H1  | general transcription factor IIH subunit 1                              |
| GTF2I   | general transcription factor Iii                                        |
| BRF1    | BRF1, RNA polymerase III transcription initiation factor 90 kDa subunit |
| HDAC2   | histone deacetylase 2                                                   |
| HIC1    | hypermethylated in cancer 1                                             |
| MNX1    | motor neuron and pancreas homeobox 1                                    |
| HMGB1   | high mobility group box 1                                               |
| HNF4A   | hepatocyte nuclear factor 4 alpha                                       |
| HNF4G   | hepatocyte nuclear factor 4 gamma                                       |
| HNRNPAB | heterogeneous nuclear ribonucleoprotein A/B                             |
| HOXC6   | homeobox C6                                                             |
| IRF8    | interferon regulatory factor 8                                          |
| ID4     | inhibitor of DNA binding 4, HLH protein                                 |
| FOXK2   | forkhead box K2                                                         |
| ILF2    | interleukin enhancer binding factor 2                                   |
| ILF3    | interleukin enhancer binding factor 3                                   |
| ING2    | inhibitor of growth family member 2                                     |
| INHBA   | inhibin beta A                                                          |
| IRF1    | interferon regulatory factor 1                                          |
| IRF2    | interferon regulatory factor 2                                          |
| IRF7    | interferon regulatory factor 7                                          |
| LMX1B   | LIM homeobox transcription factor 1 beta                                |
| SMAD2   | SMAD family member 2                                                    |
| SMAD3   | SMAD family member 3                                                    |
| MAX     | MYC associated factor X                                                 |
| MEIS2   | Meis homeobox 2                                                         |
| MEN1    | menin 1                                                                 |
| MLL2    | myeloid/lymphoid or mixed-lineage leukemia; translocated to, 6          |
| MYC     | v-myc avian myelocytomatosis viral oncogene homolog                     |

|         |                                                                                                   |
|---------|---------------------------------------------------------------------------------------------------|
| MYCN    | v-myc avian myelocytomatosis viral oncogene neuroblastoma derived homolog                         |
| MYO6    | myosin VI                                                                                         |
| MYOD1   | myogenic differentiation 1                                                                        |
| NEUROD2 | neuronal differentiation 2                                                                        |
| NEUROG1 | neurogenin 1                                                                                      |
| NFATC1  | nuclear factor of activated T-cells 1                                                             |
| NFATC2  | nuclear factor of activated T-cells 2                                                             |
| NFATC4  | nuclear factor of activated T-cells 4                                                             |
| NFIC    | nuclear factor I C                                                                                |
| NFIX    | nuclear factor I X                                                                                |
| NFKB1   | nuclear factor kappa B subunit 1                                                                  |
| NFRKB   | nuclear factor related to kappaB binding protein                                                  |
| NFYA    | nuclear transcription factor Y subunit alpha                                                      |
| NFYC    | nuclear transcription factor Y subunit gamma                                                      |
| NOTCH4  | notch 4                                                                                           |
| NPAS2   | neuronal PAS domain protein 2                                                                     |
| NRF1    | nuclear respiratory factor 1                                                                      |
| NRL     | neural retina leucine zipper                                                                      |
| PAWR    | pro-apoptotic WT1 regulator                                                                       |
| PAX1    | paired box 1                                                                                      |
| PAX2    | paired box 2                                                                                      |
| PBX1    | PBX homeobox 1                                                                                    |
| PBX3    | PBX homeobox 3                                                                                    |
| PEX14   | peroxisomal biogenesis factor 14                                                                  |
| PFDN5   | prefoldin subunit 5                                                                               |
| PITX2   | paired like homeodomain 2                                                                         |
| PLAGL1  | PLAG1 like zinc finger 1                                                                          |
| POLR2D  | polymerase (RNA) II subunit D                                                                     |
| POLR2F  | polymerase (RNA) II subunit F                                                                     |
| POLR2G  | polymerase (RNA) II subunit G                                                                     |
| POLR2J  | polymerase (RNA) II subunit J                                                                     |
| POLRMT  | polymerase (RNA) mitochondrial                                                                    |
| POU2AF1 | POU class 2 associating factor 1                                                                  |
| POU5F1  | POU class 5 homeobox 1                                                                            |
| PPARA   | peroxisome proliferator activated receptor alpha                                                  |
| PPARD   | peroxisome proliferator activated receptor delta                                                  |
| PPARG   | peroxisome proliferator activated receptor gamma                                                  |
| PSMC5   | proteasome 26S subunit, ATPase 5                                                                  |
| PTGER3  | prostaglandin E receptor 3                                                                        |
| RB1     | retinoblastoma 1                                                                                  |
| RBBP8   | retinoblastoma binding protein 8                                                                  |
| REST    | RE1 silencing transcription factor                                                                |
| TRIM27  | tripartite motif containing 27                                                                    |
| RNF4    | ring finger protein 4                                                                             |
| RORB    | RAR related orphan receptor B                                                                     |
| RREB1   | ras responsive element binding protein 1                                                          |
| RXRA    | retinoid X receptor alpha                                                                         |
| SNAI2   | snail family transcriptional repressor 2                                                          |
| SMARCA2 | SWI/SNF related, matrix associated, actin dependent regulator of chromatin, subfamily a, member 2 |
| SMARCD2 | SWI/SNF related, matrix associated, actin dependent regulator of chromatin, subfamily d, member 2 |
| SMARCE1 | SWI/SNF related, matrix associated, actin dependent regulator of chromatin, subfamily e, member 1 |
| SNAPC2  | small nuclear RNA activating complex polypeptide 2                                                |
| SNAPC3  | small nuclear RNA activating complex polypeptide 3                                                |
| SOD2    | superoxide dismutase 2, mitochondrial                                                             |
| SP1     | Sp1 transcription factor                                                                          |

|         |                                                                                                  |
|---------|--------------------------------------------------------------------------------------------------|
| SP2     | Sp2 transcription factor                                                                         |
| SP3     | Sp3 transcription factor                                                                         |
| SP100   | SP100 nuclear antigen                                                                            |
| SPI1    | Spi-1 proto-oncogene                                                                             |
| SPIB    | Spi-B transcription factor                                                                       |
| SREBF1  | sterol regulatory element binding transcription factor 1                                         |
| SREBF2  | sterol regulatory element binding transcription factor 2                                         |
| SUPT5H  | SPT5 homolog, DSIF elongation factor subunit                                                     |
| TAF5    | TATA-box binding protein associated factor 5                                                     |
| TARBP1  | TAR (HIV-1) RNA binding protein 1                                                                |
| TARBP2  | TARBP2, RISC loading complex RNA binding subunit                                                 |
| TBX5    | T-box 5                                                                                          |
| TCEB1   | transcription elongation factor B subunit 1                                                      |
| TCEB2   | transcription elongation factor B subunit 2                                                      |
| TBX3    | T-box 3                                                                                          |
| HNF1A   | HNF1 homeobox A                                                                                  |
| HNF1B   | HNF1 homeobox B                                                                                  |
| TCF3    | transcription factor 3                                                                           |
| TCF7L2  | transcription factor 7 like 2                                                                    |
| ZEB1    | zinc finger E-box binding homeobox 1                                                             |
| TCF12   | transcription factor 12                                                                          |
| ZNF354A | zinc finger protein 354A                                                                         |
| TCF19   | transcription factor 19                                                                          |
| VPS72   | vacuolar protein sorting 72 homolog                                                              |
| TFAP2A  | transcription factor AP-2 alpha                                                                  |
| TFAP2B  | transcription factor AP-2 beta                                                                   |
| NR2F2   | nuclear receptor subfamily 2 group F member 2                                                    |
| TFDP1   | transcription factor Dp-1                                                                        |
| TGFB1   | transforming growth factor beta 1                                                                |
| TGIF1   | TGFB induced factor homeobox 1                                                                   |
| KLF10   | Kruppel-like factor 10                                                                           |
| TIAL1   | TIA1 cytotoxic granule-associated RNA binding protein-like 1                                     |
| TNF     | tumor necrosis factor                                                                            |
| TP73    | tumor protein p73                                                                                |
| TRPS1   | transcriptional repressor GATA binding 1                                                         |
| HIRA    | histone cell cycle regulator                                                                     |
| TWIST1  | twist family bHLH transcription factor 1                                                         |
| UBTF    | upstream binding transcription factor, RNA polymerase I                                          |
| USF1    | upstream transcription factor 1                                                                  |
| YY1     | YY1 transcription factor                                                                         |
| ZNF45   | zinc finger protein 45                                                                           |
| ZNF74   | zinc finger protein 74                                                                           |
| ZBTB16  | zinc finger and BTB domain containing 16                                                         |
| ZNF146  | zinc finger protein 146                                                                          |
| ZNF148  | zinc finger protein 148                                                                          |
| ZNF174  | zinc finger protein 174                                                                          |
| PAX8    | paired box 8                                                                                     |
| ALX1    | ALX homeobox 1                                                                                   |
| ELL     | elongation factor for RNA polymerase II                                                          |
| ARID1A  | AT-rich interaction domain 1A                                                                    |
| KLF11   | Kruppel-like factor 11                                                                           |
| SUPT3H  | SPT3 homolog, SAGA and STAGA complex component                                                   |
| IKBKAP  | inhibitor of kappa light polypeptide gene enhancer in B-cells, kinase complex-associated protein |
| RUVBL1  | RuvB like AAA ATPase 1                                                                           |
| CREG1   | cellular repressor of E1A stimulated genes 1                                                     |
| TRIM24  | tripartite motif containing 24                                                                   |
| TSC22D1 | TSC22 domain family member 1                                                                     |



|          |                                                                                 |
|----------|---------------------------------------------------------------------------------|
| LDB1     | LIM domain binding 1                                                            |
| SQSTM1   | sequestosome 1                                                                  |
| FUBP1    | far upstream element binding protein 1                                          |
| BUD31    | BUD31 homolog                                                                   |
| RPS6KA4  | ribosomal protein S6 kinase A4                                                  |
| ASH2L    | ASH2 like histone lysine methyltransferase complex subunit                      |
| TBX19    | T-box 19                                                                        |
| NMI      | N-myc and STAT interactor                                                       |
| DYRK1B   | dual specificity tyrosine phosphorylation regulated kinase 1B                   |
| LRRFIP1  | leucine rich repeat (in FLII) interacting protein 1                             |
| PTTG1    | pituitary tumor-transforming 1                                                  |
| MSC      | musculin                                                                        |
| KLF4     | Kruppel-like factor 4 (gut)                                                     |
| TRIP13   | thyroid hormone receptor interactor 13                                          |
| TRIP11   | thyroid hormone receptor interactor 11                                          |
| ZNHIT3   | zinc finger HIT-type containing 3                                               |
| MED21    | mediator complex subunit 21                                                     |
| MED17    | mediator complex subunit 17                                                     |
| MED26    | mediator complex subunit 26                                                     |
| HAND2    | heart and neural crest derivatives expressed 2                                  |
| VPS4B    | vacuolar protein sorting 4 homolog B                                            |
| POLR1C   | polymerase (RNA) I subunit C                                                    |
| CIR1     | corepressor interacting with RBPJ, 1                                            |
| CREB5    | cAMP responsive element binding protein 5                                       |
| NFE2L3   | nuclear factor, erythroid 2 like 3                                              |
| RNF14    | ring finger protein 14                                                          |
| HDAC4    | histone deacetylase 4                                                           |
| MAML1    | mastermind like transcriptional coactivator 1                                   |
| MED24    | mediator complex subunit 24                                                     |
| MED13    | mediator complex subunit 13                                                     |
| HDAC5    | histone deacetylase 5                                                           |
| TRIM28   | tripartite motif containing 28                                                  |
| SAP18    | Sin3A associated protein 18kDa                                                  |
| CITED2   | Cbp/p300 interacting transactivator with Glu/Asp rich carboxy-terminal domain 2 |
| FST      | follistatin                                                                     |
| TADA3    | transcriptional adaptor 3                                                       |
| MYBBP1A  | MYB binding protein 1a                                                          |
| DEAF1    | DEAF1, transcription factor                                                     |
| KAT5     | lysine acetyltransferase 5                                                      |
| IVNS1ABP | influenza virus NS1A binding protein                                            |
| TCFL5    | transcription factor like 5                                                     |
| ZMYND11  | zinc finger MYND-type containing 11                                             |
| ZNF274   | zinc finger protein 274                                                         |
| CD3EAP   | CD3e molecule associated protein                                                |
| ARID5A   | AT-rich interaction domain 5A                                                   |
| PPARGC1A | PPARG coactivator 1 alpha                                                       |
| BRD8     | bromodomain containing 8                                                        |
| ADRM1    | adhesion regulating molecule 1                                                  |
| SOX30    | SRY-box 30                                                                      |
| PRDM4    | PR domain 4                                                                     |
| KAT7     | lysine acetyltransferase 7                                                      |
| SOX21    | SRY-box 21                                                                      |
| SNF8     | SNF8, ESCRT-II complex subunit                                                  |
| KLF12    | Kruppel-like factor 12                                                          |
| POU6F2   | POU class 6 homeobox 2                                                          |
| ATF5     | activating transcription factor 5                                               |
| ZHX2     | zinc fingers and homeoboxes 2                                                   |
| TRAK1    | trafficking kinesin protein 1                                                   |

|                                            |                                                                                                |
|--------------------------------------------|------------------------------------------------------------------------------------------------|
| ATF6                                       | activating transcription factor 6                                                              |
| SCAP                                       | SREBF chaperone                                                                                |
| CRTC1                                      | CREB regulated transcription coactivator 1                                                     |
| SIRT5                                      | sirtuin 5                                                                                      |
| RYBP                                       | RING1 and YY1 binding protein                                                                  |
| TRIM29                                     | tripartite motif containing 29                                                                 |
| POU2F3                                     | POU class 2 homeobox 3                                                                         |
| SIN3A                                      | SIN3 transcription regulator family member A                                                   |
| GMEB2                                      | glucocorticoid modulatory element binding protein 2                                            |
| EHF                                        | ETS homologous factor                                                                          |
| NUFIP1                                     | NUFIP1, FMR1 interacting protein 1                                                             |
| FOXD3                                      | forkhead box D3                                                                                |
| MED4                                       | mediator complex subunit 4                                                                     |
| UHRF1                                      | ubiquitin like with PHD and ring finger domains 1                                              |
| ABT1                                       | activator of basal transcription 1                                                             |
| UBN1                                       | ubiquitin 1                                                                                    |
| MDFIC                                      | MyoD family inhibitor domain containing                                                        |
| KCNIP3                                     | potassium voltage-gated channel interacting protein 3                                          |
| SMARCAL1                                   | SWI/SNF related, matrix associated, actin dependent regulator of chromatin, subfamily a like 1 |
| MYEF2                                      | myelin expression factor 2                                                                     |
| NDUFA13                                    | NADH:ubiquinone oxidoreductase subunit A13                                                     |
| YBX2                                       | Y-box binding protein 2                                                                        |
| PHF21A                                     | PHD finger protein 21A                                                                         |
| KLF13                                      | Kruppel-like factor 13                                                                         |
| SUFU                                       | SUFU negative regulator of hedgehog signaling                                                  |
| POLR3K                                     | polymerase (RNA) III subunit K                                                                 |
| SOX18                                      | SRY-box 18                                                                                     |
| FEV                                        | FEV, ETS transcription factor                                                                  |
| ELP3                                       | elongator acetyltransferase complex subunit 3                                                  |
| MAML3                                      | mastermind like transcriptional coactivator 3                                                  |
| TRERF1                                     | transcriptional regulating factor 1                                                            |
| ASH1L                                      | ASH1 like histone lysine methyltransferase                                                     |
| SLC2A4RG                                   | SLC2A4 regulator                                                                               |
| CTNNBIP1                                   | catenin beta interacting protein 1                                                             |
| NSD1                                       | nuclear receptor binding SET domain protein 1                                                  |
| NAA15                                      | N(alpha)-acetyltransferase 15, NatA auxiliary subunit                                          |
| ELL3                                       | elongation factor for RNA polymerase II 3                                                      |
| PBX4                                       | PBX homeobox 4                                                                                 |
| SCRT1                                      | scratch family transcriptional repressor 1                                                     |
| PCBD2                                      | pterin-4 alpha-carbinolamine dehydratase 2                                                     |
| SLA2                                       | Src-like-adaptor 2                                                                             |
| MAML2                                      | mastermind like transcriptional coactivator 2                                                  |
| AFAP1L2                                    | actin filament associated protein 1 like 2                                                     |
| GTF3C6                                     | general transcription factor IIIC subunit 6                                                    |
| TWIST2                                     | twist family bHLH transcription factor 2                                                       |
| HEXIM2                                     | hexamethylene bisacetamide inducible 2                                                         |
| GABPB2                                     | GA binding protein transcription factor beta subunit 2                                         |
| TAF8                                       | TATA-box binding protein associated factor 8                                                   |
| GLIS3                                      | GLIS family zinc finger 3                                                                      |
| ZNF367                                     | zinc finger protein 367                                                                        |
| JMJD1C                                     | jumonji domain containing 1C                                                                   |
| JAZF1                                      | JAZF zinc finger 1                                                                             |
| ZBTB38                                     | zinc finger and BTB domain containing 38                                                       |
| PTF1A                                      | pancreas specific transcription factor, 1a                                                     |
| MAFA                                       | MAF bZIP transcription factor A                                                                |
| <b>Regulation of developmental process</b> |                                                                                                |
| <b>Gene</b>                                | <b>Name Gene</b>                                                                               |

| <b>Symbol</b> |                                                      |
|---------------|------------------------------------------------------|
| ACVR1         | activin A receptor type 1                            |
| ADORA1        | adenosine A1 receptor                                |
| ALB           | albumin                                              |
| ALOX15B       | arachidonate 15-lipoxygenase, type B                 |
| ANXA1         | annexin A1                                           |
| ANXA4         | annexin A4                                           |
| ANXA5         | annexin A5                                           |
| APAF1         | apoptotic peptidase activating factor 1              |
| BIRC3         | baculoviral IAP repeat containing 3                  |
| BIRC5         | baculoviral IAP repeat containing 5                  |
| FASLG         | Fas ligand                                           |
| RHOB          | ras homolog family member B                          |
| ARHGDI1       | Rho GDP dissociation inhibitor alpha                 |
| ASNS          | asparagine synthetase (glutamine-hydrolyzing)        |
| BAK1          | BCL2 antagonist/killer 1                             |
| BCL2          | B-cell CLL/lymphoma 2                                |
| BCL2A1        | BCL2 related protein A1                              |
| BCL2L2        | BCL2 like 2                                          |
| BCL3          | B-cell CLL/lymphoma 3                                |
| BCL6          | B-cell CLL/lymphoma 6                                |
| BID           | BH3 interacting domain death agonist                 |
| BIK           | BCL2 interacting killer                              |
| BMP4          | bone morphogenetic protein 4                         |
| BNIP2         | BCL2/adenovirus E1B 19kDa interacting protein 2      |
| BNIP3         | BCL2/adenovirus E1B 19kDa interacting protein 3      |
| BNIP3L        | BCL2/adenovirus E1B 19kDa interacting protein 3-like |
| FOXO1         | forkhead box O1                                      |
| FOXO2         | forkhead box O2                                      |
| FOXO3         | forkhead box O3                                      |
| BRCA1         | breast cancer 1                                      |
| BRAF          | B-Raf proto-oncogene, serine/threonine kinase        |
| BTG1          | B-cell translocation gene 1, anti-proliferative      |
| CALCA         | calcitonin related polypeptide alpha                 |
| CALR          | calreticulin                                         |
| CASP9         | caspase 9                                            |
| CASP10        | caspase 10                                           |
| RUNX1         | runt related transcription factor 1                  |
| RUNX3         | runt related transcription factor 3                  |
| TNFRSF8       | tumor necrosis factor receptor superfamily member 8  |
| CD74          | CD74 molecule                                        |
| CDC42         | cell division cycle 42                               |
| CDK6          | cyclin-dependent kinase 6                            |
| CDKN1A        | cyclin-dependent kinase inhibitor 1A                 |
| CDKN1B        | cyclin-dependent kinase inhibitor 1B                 |
| CENPF         | centromere protein F                                 |
| CFL1          | cofilin 1                                            |
| CIDEA         | cell death-inducing DFFA-like effector a             |
| COL4A2        | collagen type IV alpha 2                             |
| CRYAA         | crystallin alpha A                                   |
| DAD1          | defender against cell death 1                        |
| DAP           | death-associated protein                             |
| DAPK1         | death associated protein kinase 1                    |
| DAPK3         | death-associated protein kinase 3                    |
| DAXX          | death-domain associated protein                      |
| DFFA          | DNA fragmentation factor subunit alpha               |
| DHCR24        | 24-dehydrocholesterol reductase                      |
| DTX1          | deltex 1                                             |
| EIF5A         | eukaryotic translation initiation factor 5A          |
| ERCC3         | excision repair cross-complementation group 3        |

|         |                                                            |
|---------|------------------------------------------------------------|
| ETS1    | ETS proto-oncogene 1, transcription factor                 |
| FOXO1   | forkhead box O1                                            |
| IFI6    | interferon alpha inducible protein 6                       |
| GDNF    | glial cell derived neurotrophic factor                     |
| GCLC    | glutamate-cysteine ligase catalytic subunit                |
| SFN     | stratifin                                                  |
| GRM4    | glutamate metabotropic receptor 4                          |
| GSTP1   | glutathione S-transferase pi 1                             |
| HTT     | huntingtin                                                 |
| HDAC1   | histone deacetylase 1                                      |
| HIP1    | huntingtin interacting protein 1                           |
| HMGB1   | high mobility group box 1                                  |
| HSPA9   | heat shock protein family A (Hsp70) member 9               |
| HSPD1   | heat shock protein family D (Hsp60) member 1               |
| IFNA2   | interferon, alpha 2                                        |
| IGF1R   | insulin like growth factor 1 receptor                      |
| IGFBP3  | insulin like growth factor binding protein 3               |
| IL12A   | interleukin 12A                                            |
| IL12B   | interleukin 12B                                            |
| INHBA   | inhibin beta A                                             |
| KRT18   | keratin 18                                                 |
| LCK     | LCK proto-oncogene, Src family tyrosine kinase             |
| LTA     | lymphotoxin alpha                                          |
| SMAD3   | SMAD family member 3                                       |
| MAPT    | microtubule associated protein tau                         |
| MAP3K5  | mitogen-activated protein kinase kinase kinase 5           |
| MAP3K10 | mitogen-activated protein kinase kinase kinase 10          |
| MPO     | myeloperoxidase                                            |
| MYH9    | myosin, heavy chain 9, non-muscle                          |
| NF1     | neurofibromin 1                                            |
| NFKB1   | nuclear factor kappa B subunit 1                           |
| NOTCH1  | notch 1                                                    |
| NOTCH4  | notch 4                                                    |
| NPR1    | natriuretic peptide receptor 1                             |
| OPA1    | OPA1, mitochondrial dynamin like GTPase                    |
| PAX7    | paired box 7                                               |
| PIM1    | Pim-1 proto-oncogene, serine/threonine kinase              |
| PIK3R2  | phosphoinositide-3-kinase regulatory subunit 2             |
| PLAGL1  | PLAG1 like zinc finger 1                                   |
| PLG     | plasminogen                                                |
| PMAIP1  | phorbol-12-myristate-13-acetate-induced protein 1          |
| PPARG   | peroxisome proliferator activated receptor gamma           |
| PPP2CA  | protein phosphatase 2 catalytic subunit alpha              |
| SRGN    | serglycin                                                  |
| PRKCA   | protein kinase C alpha                                     |
| PRKCE   | protein kinase C epsilon                                   |
| PRKCZ   | protein kinase C zeta                                      |
| MAPK1   | mitogen-activated protein kinase 1                         |
| PROC    | protein C, inactivator of coagulation factors Va and VIIIa |
| PSEN1   | presenilin 1                                               |
| PTEN    | phosphatase and tensin homolog                             |
| PTH     | parathyroid hormone                                        |
| PTPRC   | protein tyrosine phosphatase, receptor type C              |
| RELA    | RELA proto-oncogene, NF-kB subunit                         |
| DPF2    | double PHD fingers 2                                       |
| ROBO1   | roundabout guidance receptor 1                             |
| ROBO2   | roundabout guidance receptor 2                             |
| RTKN    | rhotekin                                                   |

|           |                                                                              |
|-----------|------------------------------------------------------------------------------|
| SFRP1     | secreted frizzled related protein 1                                          |
| SHH       | sonic hedgehog                                                               |
| SON       | SON DNA binding protein                                                      |
| SPI1      | Spi-1 proto-oncogene                                                         |
| STK4      | serine/threonine kinase 4                                                    |
| TBX5      | T-box 5                                                                      |
| TBX3      | T-box 3                                                                      |
| PRDX2     | peroxiredoxin 2                                                              |
| TGFB1     | transforming growth factor beta 1                                            |
| TGFB2     | transforming growth factor beta 2                                            |
| TIA1      | TIA1 cytotoxic granule-associated RNA binding protein                        |
| TIAL1     | TIA1 cytotoxic granule-associated RNA binding protein-like 1                 |
| TNF       | tumor necrosis factor                                                        |
| TNNI3     | troponin I3, cardiac type                                                    |
| TOP2A     | topoisomerase (DNA) II alpha                                                 |
| TP53BP2   | tumor protein p53 binding protein 2                                          |
| TP73      | tumor protein p73                                                            |
| TPD52L1   | tumor protein D52-like 1                                                     |
| TRAF3     | TNF receptor associated factor 3                                             |
| UBB       | ubiquitin B                                                                  |
| VEGFA     | vascular endothelial growth factor A                                         |
| YWHAG     | tyrosine 3-monooxygenase/tryptophan 5-monooxygenase activation protein gamma |
| YWHAH     | tyrosine 3-monooxygenase/tryptophan 5-monooxygenase activation protein eta   |
| YWHAZ     | tyrosine 3-monooxygenase/tryptophan 5-monooxygenase activation protein zeta  |
| ZAP70     | zeta chain of T cell receptor associated protein kinase 70kDa                |
| ZBTB16    | zinc finger and BTB domain containing 16                                     |
| CUL5      | cullin 5                                                                     |
| DPF1      | double PHD fingers 1                                                         |
| CUL4A     | cullin 4A                                                                    |
| CUL2      | cullin 2                                                                     |
| MADD      | MAP kinase activating death domain                                           |
| BECN1     | beclin 1                                                                     |
| TRADD     | TNFRSF1A associated via death domain                                         |
| TNFRSF25  | tumor necrosis factor receptor superfamily member 25                         |
| HRK       | harakiri, BCL2 interacting protein                                           |
| TNFSF14   | tumor necrosis factor superfamily member 14                                  |
| FADD      | Fas associated via death domain                                              |
| TNFRSF18  | tumor necrosis factor receptor superfamily member 18                         |
| TNFRSF10D | tumor necrosis factor receptor superfamily member 10d                        |
| LDB1      | LIM domain binding 1                                                         |
| IER3      | immediate early response 3                                                   |
| SPHK1     | sphingosine kinase 1                                                         |
| TNFSF18   | tumor necrosis factor superfamily member 18                                  |
| SOCS3     | suppressor of cytokine signaling 3                                           |
| SART1     | squamous cell carcinoma antigen recognized by T-cells 1                      |
| KL        | klotho                                                                       |
| EI24      | EI24, autophagy associated transmembrane protein                             |
| BCAR1     | BCAR1, Cas family scaffolding protein                                        |
| RNF7      | ring finger protein 7                                                        |
| HDAC9     | histone deacetylase 9                                                        |
| HDAC4     | histone deacetylase 4                                                        |
| CASP8AP2  | caspase 8 associated protein 2                                               |
| HDAC5     | histone deacetylase 5                                                        |
| BCL2L10   | BCL2 like 10                                                                 |
| DNAJB6    | DnaJ heat shock protein family (Hsp40) member B6                             |
| HIPK3     | homeodomain interacting protein kinase 3                                     |
| SMNDC1    | survival motor neuron domain containing 1                                    |
| CDC42EP2  | CDC42 effector protein 2                                                     |

|                                 |                                                              |
|---------------------------------|--------------------------------------------------------------|
| FST                             | follistatin                                                  |
| SEMA4D                          | semaphorin 4D                                                |
| RRAGA                           | Ras related GTP binding A                                    |
| TCFL5                           | transcription factor like 5                                  |
| RIPK3                           | receptor interacting serine/threonine kinase 3               |
| CHEK2                           | checkpoint kinase 2                                          |
| NLGN1                           | neuroligin 1                                                 |
| ACIN1                           | apoptotic chromatin condensation inducer 1                   |
| ERC1                            | ELKS/RAB6-interacting/CAST family member 1                   |
| STAB1                           | stabilin 1                                                   |
| PPP1R13B                        | protein phosphatase 1 regulatory subunit 13B                 |
| DDAH2                           | dimethylarginine dimethylaminohydrolase 2                    |
| DAPK2                           | death-associated protein kinase 2                            |
| CADM1                           | cell adhesion molecule 1                                     |
| TNFAIP8                         | TNF alpha induced protein 8                                  |
| CIDEB                           | cell death-inducing DFFA-like effector b                     |
| SAP30BP                         | SAP30 binding protein                                        |
| IL20                            | interleukin 20                                               |
| NDUFA13                         | NADH:ubiquinone oxidoreductase subunit A13                   |
| SH3GLB1                         | SH3 domain containing GRB2 like endophilin B1                |
| TRIAP1                          | TP53 regulated inhibitor of apoptosis 1                      |
| HDAC7                           | histone deacetylase 7                                        |
| ZAK                             | sterile alpha motif and leucine zipper containing kinase AZK |
| IFT57                           | intraflagellar transport 57                                  |
| AGGF1                           | angiogenic factor with G-patch and FHA domains 1             |
| ANKH                            | ANKH inorganic pyrophosphate transport regulator             |
| MKL2                            | MKL1/myocardin like 2                                        |
| LRRC4C                          | leucine rich repeat containing 4C                            |
| CIDEC                           | cell death inducing DFFA like effector c                     |
| MOAP1                           | modulator of apoptosis 1                                     |
| ARAP3                           | ArfGAP with RhoGAP domain, ankyrin repeat and PH domain 3    |
| AKT1S1                          | AKT1 substrate 1                                             |
| AIFM2                           | apoptosis inducing factor, mitochondria associated 2         |
| HPS4                            | HPS4, biogenesis of lysosomal organelles complex 3 subunit 2 |
| NLRP3                           | NLR family, pyrin domain containing 3                        |
| ARAP1                           | ArfGAP with RhoGAP domain, ankyrin repeat and PH domain 1    |
| TWIST2                          | twist family bHLH transcription factor 2                     |
| IKBIP                           | IKBKB interacting protein                                    |
| TAF8                            | TATA-box binding protein associated factor 8                 |
| ACVR1C                          | activin A receptor type 1C                                   |
| ADIG                            | adipogenin                                                   |
| SIK1                            | salt inducible kinase 1                                      |
| AIFM3                           | apoptosis inducing factor, mitochondria associated 3         |
| FGD5                            | FYVE, RhoGEF and PH domain containing 5                      |
| CNTN4                           | contactin 4                                                  |
| PRUNE2                          | prune homolog 2 (Drosophila)                                 |
| FGD2                            | FYVE, RhoGEF and PH domain containing 2                      |
| PCSK9                           | proprotein convertase subtilisin/kexin type 9                |
| MYO18A                          | myosin XVIII A                                               |
| <b>RNA biosynthetic process</b> |                                                              |
| <b>Gene Symbol</b>              | <b>Name Gene</b>                                             |
| ABCA2                           | ATP binding cassette subfamily A member 2                    |
| PARP1                           | poly(ADP-ribose) polymerase 1                                |
| AHR                             | aryl hydrocarbon receptor                                    |
| ANG                             | angiogenin                                                   |
| ARNTL                           | aryl hydrocarbon receptor nuclear translocator like          |
| ZFX3                            | zinc finger homeobox 3                                       |

|        |                                                                         |
|--------|-------------------------------------------------------------------------|
| NKX3-2 | NK3 homeobox 2                                                          |
| BCL6   | B-cell CLL/lymphoma 6                                                   |
| PRDM1  | PR domain 1                                                             |
| BMP2   | bone morphogenetic protein 2                                            |
| BMP6   | bone morphogenetic protein 6                                            |
| BRCA1  | breast cancer 1                                                         |
| BTF3   | basic transcription factor 3                                            |
| CALR   | calreticulin                                                            |
| RUNX1  | runt related transcription factor 1                                     |
| RUNX3  | runt related transcription factor 3                                     |
| CBFB   | core-binding factor, beta subunit                                       |
| CDK7   | cyclin-dependent kinase 7                                               |
| CEBPA  | CCAAT/enhancer binding protein alpha                                    |
| CEBPB  | CCAAT/enhancer binding protein beta                                     |
| CHD3   | chromodomain helicase DNA binding protein 3                             |
| FOXN3  | forkhead box N3                                                         |
| CREBBP | CREB binding protein                                                    |
| CREM   | cAMP responsive element modulator                                       |
| NKX2-5 | NK2 homeobox 5                                                          |
| CUX1   | cut like homeobox 1                                                     |
| DAXX   | death-domain associated protein                                         |
| DBP    | D-box binding PAR bZIP transcription factor                             |
| DNMT1  | DNA (cytosine-5-)-methyltransferase 1                                   |
| DTX1   | deltex 1                                                                |
| E2F2   | E2F transcription factor 2                                              |
| E2F3   | E2F transcription factor 3                                              |
| ELAVL2 | ELAV like neuron-specific RNA binding protein 2                         |
| ELF2   | E74 like ETS transcription factor 2                                     |
| EPAS1  | endothelial PAS domain protein 1                                        |
| ERCC3  | excision repair cross-complementation group 3                           |
| ERCC6  | excision repair cross-complementation group 6                           |
| ERF    | ETS2 repressor factor                                                   |
| ESRRG  | estrogen related receptor gamma                                         |
| EZH2   | enhancer of zeste 2 polycomb repressive complex 2 subunit               |
| BPTF   | bromodomain PHD finger transcription factor                             |
| FOXF1  | forkhead box F1                                                         |
| FOXF2  | forkhead box F2                                                         |
| FOXE3  | forkhead box E3                                                         |
| FOXO1  | forkhead box O1                                                         |
| FOSL2  | FOS like 2, AP-1 transcription factor subunit                           |
| NR5A2  | nuclear receptor subfamily 5 group A member 2                           |
| NR5A1  | nuclear receptor subfamily 5 group A member 1                           |
| XRCC6  | X-ray repair complementing defective repair in Chinese hamster cells 6  |
| GATA2  | GATA binding protein 2                                                  |
| GATA3  | GATA binding protein 3                                                  |
| GATA4  | GATA binding protein 4                                                  |
| GATA6  | GATA binding protein 6                                                  |
| KAT2A  | lysine acetyltransferase 2A                                             |
| NR6A1  | nuclear receptor subfamily 6 group A member 1                           |
| GFI1   | growth factor independent 1 transcriptional repressor                   |
| GLI2   | GLI family zinc finger 2                                                |
| NR3C1  | nuclear receptor subfamily 3 group C member 1                           |
| GSC2   | gooseoid homeobox 2                                                     |
| GTF2B  | general transcription factor IIB                                        |
| GTF2H1 | general transcription factor IIH subunit 1                              |
| GTF2I  | general transcription factor Ili                                        |
| BRF1   | BRF1, RNA polymerase III transcription initiation factor 90 kDa subunit |
| HDAC2  | histone deacetylase 2                                                   |

|         |                                                                           |
|---------|---------------------------------------------------------------------------|
| HIC1    | hypermethylated in cancer 1                                               |
| MNX1    | motor neuron and pancreas homeobox 1                                      |
| HMGB1   | high mobility group box 1                                                 |
| HNF4A   | hepatocyte nuclear factor 4 alpha                                         |
| HNF4G   | hepatocyte nuclear factor 4 gamma                                         |
| HNRNPAB | heterogeneous nuclear ribonucleoprotein A/B                               |
| HOXC6   | homeobox C6                                                               |
| IRF8    | interferon regulatory factor 8                                            |
| ID4     | inhibitor of DNA binding 4, HLH protein                                   |
| FOXC2   | forkhead box K2                                                           |
| ILF2    | interleukin enhancer binding factor 2                                     |
| ILF3    | interleukin enhancer binding factor 3                                     |
| ING2    | inhibitor of growth family member 2                                       |
| INHBA   | inhibin beta A                                                            |
| IRF1    | interferon regulatory factor 1                                            |
| IRF2    | interferon regulatory factor 2                                            |
| IRF7    | interferon regulatory factor 7                                            |
| LMX1B   | LIM homeobox transcription factor 1 beta                                  |
| SMAD2   | SMAD family member 2                                                      |
| SMAD3   | SMAD family member 3                                                      |
| MAX     | MYC associated factor X                                                   |
| MEIS2   | Meis homeobox 2                                                           |
| MEN1    | menin 1                                                                   |
| MLLT6   | myeloid/lymphoid or mixed-lineage leukemia; translocated to, 6            |
| MYC     | v-myc avian myelocytomatosis viral oncogene homolog                       |
| MYCN    | v-myc avian myelocytomatosis viral oncogene neuroblastoma derived homolog |
| MYO6    | myosin VI                                                                 |
| MYOD1   | myogenic differentiation 1                                                |
| NEUROD2 | neuronal differentiation 2                                                |
| NEUROG1 | neurogenin 1                                                              |
| NFATC1  | nuclear factor of activated T-cells 1                                     |
| NFATC2  | nuclear factor of activated T-cells 2                                     |
| NFATC4  | nuclear factor of activated T-cells 4                                     |
| NFIC    | nuclear factor I C                                                        |
| NFIX    | nuclear factor I X                                                        |
| NFKB1   | nuclear factor kappa B subunit 1                                          |
| NFRKB   | nuclear factor related to kappaB binding protein                          |
| NFYA    | nuclear transcription factor Y subunit alpha                              |
| NFYC    | nuclear transcription factor Y subunit gamma                              |
| NOTCH4  | notch 4                                                                   |
| NPAS2   | neuronal PAS domain protein 2                                             |
| NRF1    | nuclear respiratory factor 1                                              |
| NRL     | neural retina leucine zipper                                              |
| PAWR    | pro-apoptotic WT1 regulator                                               |
| PAX1    | paired box 1                                                              |
| PAX2    | paired box 2                                                              |
| PBX1    | PBX homeobox 1                                                            |
| PBX3    | PBX homeobox 3                                                            |
| PEX14   | peroxisomal biogenesis factor 14                                          |
| PFDN5   | prefoldin subunit 5                                                       |
| PITX2   | paired like homeodomain 2                                                 |
| PLAGL1  | PLAG1 like zinc finger 1                                                  |
| POLR2D  | polymerase (RNA) II subunit D                                             |
| POLR2F  | polymerase (RNA) II subunit F                                             |
| POLR2G  | polymerase (RNA) II subunit G                                             |
| POLR2J  | polymerase (RNA) II subunit J                                             |
| POLRMT  | polymerase (RNA) mitochondrial                                            |
| POU2AF1 | POU class 2 associating factor 1                                          |



|         |                                                                                                   |
|---------|---------------------------------------------------------------------------------------------------|
| POU5F1  | POU class 5 homeobox 1                                                                            |
| PPARA   | peroxisome proliferator activated receptor alpha                                                  |
| PPARD   | peroxisome proliferator activated receptor delta                                                  |
| PPARG   | peroxisome proliferator activated receptor gamma                                                  |
| PRIM1   | primase (DNA) subunit 1                                                                           |
| PSMC5   | proteasome 26S subunit, ATPase 5                                                                  |
| PTGER3  | prostaglandin E receptor 3                                                                        |
| RB1     | retinoblastoma 1                                                                                  |
| RBBP8   | retinoblastoma binding protein 8                                                                  |
| REST    | RE1 silencing transcription factor                                                                |
| TRIM27  | tripartite motif containing 27                                                                    |
| RNF4    | ring finger protein 4                                                                             |
| RORB    | RAR related orphan receptor B                                                                     |
| RREB1   | ras responsive element binding protein 1                                                          |
| RXRA    | retinoid X receptor alpha                                                                         |
| SNAI2   | snail family transcriptional repressor 2                                                          |
| SMARCA2 | SWI/SNF related, matrix associated, actin dependent regulator of chromatin, subfamily a, member 2 |
| SMARCD2 | SWI/SNF related, matrix associated, actin dependent regulator of chromatin, subfamily d, member 2 |
| SMARCE1 | SWI/SNF related, matrix associated, actin dependent regulator of chromatin, subfamily e, member 1 |
| SNAPC2  | small nuclear RNA activating complex polypeptide 2                                                |
| SNAPC3  | small nuclear RNA activating complex polypeptide 3                                                |
| SOD2    | superoxide dismutase 2, mitochondrial                                                             |
| SP1     | Sp1 transcription factor                                                                          |
| SP2     | Sp2 transcription factor                                                                          |
| SP3     | Sp3 transcription factor                                                                          |
| SP100   | SP100 nuclear antigen                                                                             |
| SPI1    | Spi-1 proto-oncogene                                                                              |
| SPIB    | Spi-B transcription factor                                                                        |
| SREBF1  | sterol regulatory element binding transcription factor 1                                          |
| SREBF2  | sterol regulatory element binding transcription factor 2                                          |
| SUPT5H  | SPT5 homolog, DSIF elongation factor subunit                                                      |
| TAF5    | TATA-box binding protein associated factor 5                                                      |
| TARBP1  | TAR (HIV-1) RNA binding protein 1                                                                 |
| TARBP2  | TARBP2, RISC loading complex RNA binding subunit                                                  |
| TBX5    | T-box 5                                                                                           |
| TCEB1   | transcription elongation factor B subunit 1                                                       |
| TCEB2   | transcription elongation factor B subunit 2                                                       |
| TBX3    | T-box 3                                                                                           |
| HNF1A   | HNF1 homeobox A                                                                                   |
| HNF1B   | HNF1 homeobox B                                                                                   |
| TCF3    | transcription factor 3                                                                            |
| TCF7L2  | transcription factor 7 like 2                                                                     |
| ZEB1    | zinc finger E-box binding homeobox 1                                                              |
| TCF12   | transcription factor 12                                                                           |
| ZNF354A | zinc finger protein 354A                                                                          |
| TCF19   | transcription factor 19                                                                           |
| VPS72   | vacuolar protein sorting 72 homolog                                                               |
| TFAP2A  | transcription factor AP-2 alpha                                                                   |
| TFAP2B  | transcription factor AP-2 beta                                                                    |
| NR2F2   | nuclear receptor subfamily 2 group F member 2                                                     |
| TFDP1   | transcription factor Dp-1                                                                         |
| TGFB1   | transforming growth factor beta 1                                                                 |
| TGIF1   | TGFB induced factor homeobox 1                                                                    |
| KLF10   | Kruppel-like factor 10                                                                            |
| TIAL1   | TIA1 cytotoxic granule-associated RNA binding protein-like 1                                      |

|         |                                                                                                  |
|---------|--------------------------------------------------------------------------------------------------|
| TNF     | tumor necrosis factor                                                                            |
| TP73    | tumor protein p73                                                                                |
| TRPS1   | transcriptional repressor GATA binding 1                                                         |
| HIRA    | histone cell cycle regulator                                                                     |
| TWIST1  | twist family bHLH transcription factor 1                                                         |
| UBTF    | upstream binding transcription factor, RNA polymerase I                                          |
| USF1    | upstream transcription factor 1                                                                  |
| YY1     | YY1 transcription factor                                                                         |
| ZNF45   | zinc finger protein 45                                                                           |
| ZNF74   | zinc finger protein 74                                                                           |
| ZBTB16  | zinc finger and BTB domain containing 16                                                         |
| ZNF146  | zinc finger protein 146                                                                          |
| ZNF148  | zinc finger protein 148                                                                          |
| ZNF174  | zinc finger protein 174                                                                          |
| PAX8    | paired box 8                                                                                     |
| ALX1    | ALX homeobox 1                                                                                   |
| ELL     | elongation factor for RNA polymerase II                                                          |
| ARID1A  | AT-rich interaction domain 1A                                                                    |
| KLF11   | Kruppel-like factor 11                                                                           |
| SUPT3H  | SPT3 homolog, SAGA and STAGA complex component                                                   |
| IKBKAP  | inhibitor of kappa light polypeptide gene enhancer in B-cells, kinase complex-associated protein |
| RUVBL1  | RuvB like AAA ATPase 1                                                                           |
| CREG1   | cellular repressor of E1A stimulated genes 1                                                     |
| TRIM24  | tripartite motif containing 24                                                                   |
| TSC22D1 | TSC22 domain family member 1                                                                     |
| LDB1    | LIM domain binding 1                                                                             |
| SQSTM1  | sequestosome 1                                                                                   |
| FUBP1   | far upstream element binding protein 1                                                           |
| BUD31   | BUD31 homolog                                                                                    |
| RPS6KA4 | ribosomal protein S6 kinase A4                                                                   |
| ASH2L   | ASH2 like histone lysine methyltransferase complex subunit                                       |
| TBX19   | T-box 19                                                                                         |
| NMI     | N-myc and STAT interactor                                                                        |
| DYRK1B  | dual specificity tyrosine phosphorylation regulated kinase 1B                                    |
| LRRFIP1 | leucine rich repeat (in FLII) interacting protein 1                                              |
| PTTG1   | pituitary tumor-transforming 1                                                                   |
| MSC     | musculin                                                                                         |
| KLF4    | Kruppel-like factor 4 (gut)                                                                      |
| TRIP13  | thyroid hormone receptor interactor 13                                                           |
| TRIP11  | thyroid hormone receptor interactor 11                                                           |
| ZNHIT3  | zinc finger HIT-type containing 3                                                                |
| MED21   | mediator complex subunit 21                                                                      |
| MED17   | mediator complex subunit 17                                                                      |
| MED26   | mediator complex subunit 26                                                                      |
| HAND2   | heart and neural crest derivatives expressed 2                                                   |
| VPS4B   | vacuolar protein sorting 4 homolog B                                                             |
| POLR1C  | polymerase (RNA) I subunit C                                                                     |
| CIR1    | corepressor interacting with RBPJ, 1                                                             |
| CREB5   | cAMP responsive element binding protein 5                                                        |
| NFE2L3  | nuclear factor, erythroid 2 like 3                                                               |
| RNF14   | ring finger protein 14                                                                           |
| HDAC4   | histone deacetylase 4                                                                            |
| MAML1   | mastermind like transcriptional coactivator 1                                                    |
| MED24   | mediator complex subunit 24                                                                      |
| MED13   | mediator complex subunit 13                                                                      |
| HDAC5   | histone deacetylase 5                                                                            |
| TRIM28  | tripartite motif containing 28                                                                   |

|          |                                                                                                |
|----------|------------------------------------------------------------------------------------------------|
| SAP18    | Sin3A associated protein 18kDa                                                                 |
| CITED2   | Cbp/p300 interacting transactivator with Glu/Asp rich carboxy-terminal domain 2                |
| FST      | folliculin                                                                                     |
| TADA3    | transcriptional adaptor 3                                                                      |
| MYBBP1A  | MYB binding protein 1a                                                                         |
| DEAF1    | DEAF1, transcription factor                                                                    |
| KAT5     | lysine acetyltransferase 5                                                                     |
| IVNS1ABP | influenza virus NS1A binding protein                                                           |
| TCFL5    | transcription factor like 5                                                                    |
| ZMYND11  | zinc finger MYND-type containing 11                                                            |
| ZNF274   | zinc finger protein 274                                                                        |
| CD3EAP   | CD3e molecule associated protein                                                               |
| ARID5A   | AT-rich interaction domain 5A                                                                  |
| PPARGC1A | PPARG coactivator 1 alpha                                                                      |
| BRD8     | bromodomain containing 8                                                                       |
| ADRM1    | adhesion regulating molecule 1                                                                 |
| SOX30    | SRY-box 30                                                                                     |
| PRDM4    | PR domain 4                                                                                    |
| KAT7     | lysine acetyltransferase 7                                                                     |
| SOX21    | SRY-box 21                                                                                     |
| SNF8     | SNF8, ESCRT-II complex subunit                                                                 |
| KLF12    | Kruppel-like factor 12                                                                         |
| POU6F2   | POU class 6 homeobox 2                                                                         |
| ATF5     | activating transcription factor 5                                                              |
| ZHX2     | zinc fingers and homeoboxes 2                                                                  |
| TRAK1    | trafficking kinesin protein 1                                                                  |
| ATF6     | activating transcription factor 6                                                              |
| SCAP     | SREBF chaperone                                                                                |
| CRTC1    | CREB regulated transcription coactivator 1                                                     |
| SIRT5    | sirtuin 5                                                                                      |
| RYBP     | RING1 and YY1 binding protein                                                                  |
| TRIM29   | tripartite motif containing 29                                                                 |
| POU2F3   | POU class 2 homeobox 3                                                                         |
| SIN3A    | SIN3 transcription regulator family member A                                                   |
| GMEB2    | glucocorticoid modulatory element binding protein 2                                            |
| EHF      | ETS homologous factor                                                                          |
| NUFIP1   | NUFIP1, FMR1 interacting protein 1                                                             |
| FOXD3    | forkhead box D3                                                                                |
| MED4     | mediator complex subunit 4                                                                     |
| UHRF1    | ubiquitin like with PHD and ring finger domains 1                                              |
| ABT1     | activator of basal transcription 1                                                             |
| UBN1     | ubiquitin 1                                                                                    |
| MDFIC    | MyoD family inhibitor domain containing                                                        |
| KCNIP3   | potassium voltage-gated channel interacting protein 3                                          |
| SMARCAL1 | SWI/SNF related, matrix associated, actin dependent regulator of chromatin, subfamily a like 1 |
| MYEF2    | myelin expression factor 2                                                                     |
| NDUFA13  | NADH:ubiquinone oxidoreductase subunit A13                                                     |
| YBX2     | Y-box binding protein 2                                                                        |
| PHF21A   | PHD finger protein 21A                                                                         |
| KLF13    | Kruppel-like factor 13                                                                         |
| SUFU     | SUFU negative regulator of hedgehog signaling                                                  |
| POLR3K   | polymerase (RNA) III subunit K                                                                 |
| SOX18    | SRY-box 18                                                                                     |
| FEV      | FEV, ETS transcription factor                                                                  |
| ELP3     | elongator acetyltransferase complex subunit 3                                                  |
| MAML3    | mastermind like transcriptional coactivator 3                                                  |
| TRERF1   | transcriptional regulating factor 1                                                            |

|                                      |                                                          |
|--------------------------------------|----------------------------------------------------------|
| ASH1L                                | ASH1 like histone lysine methyltransferase               |
| SLC2A4RG                             | SLC2A4 regulator                                         |
| CTNNBIP1                             | catenin beta interacting protein 1                       |
| NSD1                                 | nuclear receptor binding SET domain protein 1            |
| NAA15                                | N(alpha)-acetyltransferase 15, NatA auxiliary subunit    |
| ELL3                                 | elongation factor for RNA polymerase II 3                |
| PBX4                                 | PBX homeobox 4                                           |
| SCRT1                                | scratch family transcriptional repressor 1               |
| PCBD2                                | pterin-4 alpha-carbinolamine dehydratase 2               |
| SLA2                                 | Src-like-adaptor 2                                       |
| MAML2                                | mastermind like transcriptional coactivator 2            |
| AFAP1L2                              | actin filament associated protein 1 like 2               |
| GTF3C6                               | general transcription factor IIIC subunit 6              |
| TWIST2                               | twist family bHLH transcription factor 2                 |
| HEXIM2                               | hexamethylene bisacetamide inducible 2                   |
| GABPB2                               | GA binding protein transcription factor beta subunit 2   |
| TAF8                                 | TATA-box binding protein associated factor 8             |
| GLIS3                                | GLIS family zinc finger 3                                |
| ZNF367                               | zinc finger protein 367                                  |
| JMJD1C                               | jumonji domain containing 1C                             |
| JAZF1                                | JAZF zinc finger 1                                       |
| ZBTB38                               | zinc finger and BTB domain containing 38                 |
| PTF1A                                | pancreas specific transcription factor, 1a               |
| MAFA                                 | MAF bZIP transcription factor A                          |
| <b>Regulation of gene expression</b> |                                                          |
| <b>Gene Symbol</b>                   | <b>Name Gene</b>                                         |
| ABCA2                                | ATP binding cassette subfamily A member 2                |
| ACVR1                                | activin A receptor type 1                                |
| ACVR2B                               | activin A receptor type 2B                               |
| ACVRL1                               | activin A receptor like type 1                           |
| AHR                                  | aryl hydrocarbon receptor                                |
| APBB1                                | amyloid beta precursor protein binding family B member 1 |
| APBB2                                | amyloid beta precursor protein binding family B member 2 |
| ARNTL                                | aryl hydrocarbon receptor nuclear translocator like      |
| ZFH3                                 | zinc finger homeobox 3                                   |
| BCL3                                 | B-cell CLL/lymphoma 3                                    |
| BCL6                                 | B-cell CLL/lymphoma 6                                    |
| PRDM1                                | PR domain 1                                              |
| BMP2                                 | bone morphogenetic protein 2                             |
| BMP6                                 | bone morphogenetic protein 6                             |
| BNIP3                                | BCL2/adenovirus E1B 19kDa interacting protein 3          |
| BNIP3L                               | BCL2/adenovirus E1B 19kDa interacting protein 3-like     |
| BRCA1                                | breast cancer 1                                          |
| CALCA                                | calcitonin related polypeptide alpha                     |
| CALR                                 | calreticulin                                             |
| CAMK2A                               | calcium/calmodulin dependent protein kinase II alpha     |
| RUNX2                                | runt related transcription factor 2                      |
| RUNX1                                | runt related transcription factor 1                      |
| TNFRSF8                              | tumor necrosis factor receptor superfamily member 8      |
| CDK6                                 | cyclin-dependent kinase 6                                |
| CDK7                                 | cyclin-dependent kinase 7                                |
| CENPF                                | centromere protein F                                     |
| CHD3                                 | chromodomain helicase DNA binding protein 3              |
| FOXN3                                | forkhead box N3                                          |
| CREBBP                               | CREB binding protein                                     |
| CREM                                 | cAMP responsive element modulator                        |
| NKX2-5                               | NK2 homeobox 5                                           |

|         |                                                                            |
|---------|----------------------------------------------------------------------------|
| CUX1    | cut like homeobox 1                                                        |
| DAXX    | death-domain associated protein                                            |
| DAZL    | deleted in azoospermia like                                                |
| DBP     | D-box binding PAR bZIP transcription factor                                |
| DNMT1   | DNA (cytosine-5-)-methyltransferase 1                                      |
| DNMT3A  | DNA (cytosine-5-)-methyltransferase 3 alpha                                |
| EIF4B   | eukaryotic translation initiation factor 4B                                |
| EIF5    | eukaryotic translation initiation factor 5                                 |
| EIF5A   | eukaryotic translation initiation factor 5A                                |
| ELAVL2  | ELAV like neuron-specific RNA binding protein 2                            |
| ELF2    | E74 like ETS transcription factor 2                                        |
| ELK3    | ELK3, ETS transcription factor                                             |
| EP300   | E1A binding protein p300                                                   |
| EPAS1   | endothelial PAS domain protein 1                                           |
| ERCC3   | excision repair cross-complementation group 3                              |
| ERF     | ETS2 repressor factor                                                      |
| ESRRG   | estrogen related receptor gamma                                            |
| EZH2    | enhancer of zeste 2 polycomb repressive complex 2 subunit                  |
| BPTF    | bromodomain PHD finger transcription factor                                |
| FOXF1   | forkhead box F1                                                            |
| FOXF2   | forkhead box F2                                                            |
| FOXO1   | forkhead box O1                                                            |
| FOSL2   | FOS like 2, AP-1 transcription factor subunit                              |
| NR5A1   | nuclear receptor subfamily 5 group A member 1                              |
| XRCC6   | X-ray repair complementing defective repair in Chinese hamster cells 6     |
| GATA4   | GATA binding protein 4                                                     |
| GATA6   | GATA binding protein 6                                                     |
| KAT2A   | lysine acetyltransferase 2A                                                |
| NR6A1   | nuclear receptor subfamily 6 group A member 1                              |
| GFI1    | growth factor independent 1 transcriptional repressor                      |
| GHSR    | growth hormone secretagogue receptor                                       |
| GCLC    | glutamate-cysteine ligase catalytic subunit                                |
| GLI2    | GLI family zinc finger 2                                                   |
| GSC2    | goosecoid homeobox 2                                                       |
| GTF2H1  | general transcription factor IIH subunit 1                                 |
| HDAC2   | histone deacetylase 2                                                      |
| NRG1    | neuregulin 1                                                               |
| HIC1    | hypermethylated in cancer 1                                                |
| MNX1    | motor neuron and pancreas homeobox 1                                       |
| HMGB1   | high mobility group box 1                                                  |
| HMGB2   | high mobility group box 2                                                  |
| HNF4A   | hepatocyte nuclear factor 4 alpha                                          |
| HNF4G   | hepatocyte nuclear factor 4 gamma                                          |
| HNRNPAB | heterogeneous nuclear ribonucleoprotein A/B                                |
| HOXC6   | homeobox C6                                                                |
| IRF8    | interferon regulatory factor 8                                             |
| ID2     | inhibitor of DNA binding 2, HLH protein                                    |
| ID3     | inhibitor of DNA binding 3, HLH protein                                    |
| ID4     | inhibitor of DNA binding 4, HLH protein                                    |
| IKBKB   | inhibitor of kappa light polypeptide gene enhancer in B-cells, kinase beta |
| IL12B   | interleukin 12B                                                            |
| FOXP2   | forkhead box K2                                                            |
| ILF2    | interleukin enhancer binding factor 2                                      |
| ILF3    | interleukin enhancer binding factor 3                                      |
| ING2    | inhibitor of growth family member 2                                        |
| INHBA   | inhibin beta A                                                             |
| INHBB   | inhibin beta B                                                             |
| EIF3E   | eukaryotic translation initiation factor 3 subunit E                       |

|         |                                                                                                   |
|---------|---------------------------------------------------------------------------------------------------|
| IRF2    | interferon regulatory factor 2                                                                    |
| IRF4    | interferon regulatory factor 4                                                                    |
| IRF7    | interferon regulatory factor 7                                                                    |
| LMX1B   | LIM homeobox transcription factor 1 beta                                                          |
| LTB     | lymphotoxin beta                                                                                  |
| SMAD2   | SMAD family member 2                                                                              |
| SMAD3   | SMAD family member 3                                                                              |
| MEIS2   | Meis homeobox 2                                                                                   |
| MEN1    | menin 1                                                                                           |
| MLLT6   | myeloid/lymphoid or mixed-lineage leukemia; translocated to, 6                                    |
| MYC     | v-myc avian myelocytomatosis viral oncogene homolog                                               |
| MYCN    | v-myc avian myelocytomatosis viral oncogene neuroblastoma derived homolog                         |
| MYO6    | myosin VI                                                                                         |
| MYOD1   | myogenic differentiation 1                                                                        |
| NEUROD2 | neuronal differentiation 2                                                                        |
| NEUROG1 | neurogenin 1                                                                                      |
| NFATC1  | nuclear factor of activated T-cells 1                                                             |
| NFATC2  | nuclear factor of activated T-cells 2                                                             |
| NFYA    | nuclear transcription factor Y subunit alpha                                                      |
| NFYC    | nuclear transcription factor Y subunit gamma                                                      |
| NOTCH4  | notch 4                                                                                           |
| NPAS2   | neuronal PAS domain protein 2                                                                     |
| NRF1    | nuclear respiratory factor 1                                                                      |
| NRL     | neural retina leucine zipper                                                                      |
| PAWR    | pro-apoptotic WT1 regulator                                                                       |
| PBX1    | PBX homeobox 1                                                                                    |
| PBX3    | PBX homeobox 3                                                                                    |
| PER1    | period circadian clock 1                                                                          |
| PEX14   | peroxisomal biogenesis factor 14                                                                  |
| PFDN5   | prefoldin subunit 5                                                                               |
| PITX2   | paired like homeodomain 2                                                                         |
| PLAGL1  | PLAG1 like zinc finger 1                                                                          |
| POU2F1  | POU class 2 homeobox 1                                                                            |
| POU5F1  | POU class 5 homeobox 1                                                                            |
| PPARD   | peroxisome proliferator activated receptor delta                                                  |
| PPARG   | peroxisome proliferator activated receptor gamma                                                  |
| RB1     | retinoblastoma 1                                                                                  |
| RBBP8   | retinoblastoma binding protein 8                                                                  |
| RELA    | RELA proto-oncogene, NF-kB subunit                                                                |
| UPF1    | UPF1, RNA helicase and ATPase                                                                     |
| REST    | RE1 silencing transcription factor                                                                |
| TRIM27  | tripartite motif containing 27                                                                    |
| RNF4    | ring finger protein 4                                                                             |
| RORB    | RAR related orphan receptor B                                                                     |
| RREB1   | ras responsive element binding protein 1                                                          |
| RXRA    | retinoid X receptor alpha                                                                         |
| ATXN1   | ataxin 1                                                                                          |
| SNAI2   | snail family transcriptional repressor 2                                                          |
| SMARCA2 | SWI/SNF related, matrix associated, actin dependent regulator of chromatin, subfamily a, member 2 |
| SMARCD2 | SWI/SNF related, matrix associated, actin dependent regulator of chromatin, subfamily d, member 2 |
| SMARCE1 | SWI/SNF related, matrix associated, actin dependent regulator of chromatin, subfamily e, member 1 |
| SOD2    | superoxide dismutase 2, mitochondrial                                                             |
| SP1     | Sp1 transcription factor                                                                          |
| SP2     | Sp2 transcription factor                                                                          |
| SP3     | Sp3 transcription factor                                                                          |

|         |                                                                                                  |
|---------|--------------------------------------------------------------------------------------------------|
| SP100   | SP100 nuclear antigen                                                                            |
| SPI1    | Spi-1 proto-oncogene                                                                             |
| SPIB    | Spi-B transcription factor                                                                       |
| SREBF1  | sterol regulatory element binding transcription factor 1                                         |
| SREBF2  | sterol regulatory element binding transcription factor 2                                         |
| SUPT5H  | SPT5 homolog, DSIF elongation factor subunit                                                     |
| TARBP1  | TAR (HIV-1) RNA binding protein 1                                                                |
| TARBP2  | TARBP2, RISC loading complex RNA binding subunit                                                 |
| TBX5    | T-box 5                                                                                          |
| TCEB1   | transcription elongation factor B subunit 1                                                      |
| TBX3    | T-box 3                                                                                          |
| HNF1A   | HNF1 homeobox A                                                                                  |
| HNF1B   | HNF1 homeobox B                                                                                  |
| TCF3    | transcription factor 3                                                                           |
| TCF7L2  | transcription factor 7 like 2                                                                    |
| ZEB1    | zinc finger E-box binding homeobox 1                                                             |
| TCF12   | transcription factor 12                                                                          |
| ZNF354A | zinc finger protein 354A                                                                         |
| TCF19   | transcription factor 19                                                                          |
| VPS72   | vacuolar protein sorting 72 homolog                                                              |
| TFAP2A  | transcription factor AP-2 alpha                                                                  |
| TFAP2B  | transcription factor AP-2 beta                                                                   |
| NR2F2   | nuclear receptor subfamily 2 group F member 2                                                    |
| TFDP1   | transcription factor Dp-1                                                                        |
| TGFB1   | transforming growth factor beta 1                                                                |
| TGIF1   | TGFB induced factor homeobox 1                                                                   |
| KLF10   | Kruppel-like factor 10                                                                           |
| TIAL1   | TIA1 cytotoxic granule-associated RNA binding protein-like 1                                     |
| TLR3    | toll like receptor 3                                                                             |
| TNF     | tumor necrosis factor                                                                            |
| TP73    | tumor protein p73                                                                                |
| TSC1    | tuberous sclerosis 1                                                                             |
| HIRA    | histone cell cycle regulator                                                                     |
| TWIST1  | twist family bHLH transcription factor 1                                                         |
| UBB     | ubiquitin B                                                                                      |
| UBTF    | upstream binding transcription factor, RNA polymerase I                                          |
| NR1H2   | nuclear receptor subfamily 1 group H member 2                                                    |
| YY1     | YY1 transcription factor                                                                         |
| YWHAH   | tyrosine 3-monooxygenase/tryptophan 5-monooxygenase activation protein eta                       |
| ZNF45   | zinc finger protein 45                                                                           |
| ZNF74   | zinc finger protein 74                                                                           |
| ZBTB16  | zinc finger and BTB domain containing 16                                                         |
| ZNF146  | zinc finger protein 146                                                                          |
| ZNF148  | zinc finger protein 148                                                                          |
| ZNF174  | zinc finger protein 174                                                                          |
| PAX8    | paired box 8                                                                                     |
| KAT6A   | lysine acetyltransferase 6A                                                                      |
| ARID1A  | AT-rich interaction domain 1A                                                                    |
| KLF11   | Kruppel-like factor 11                                                                           |
| SUPT3H  | SPT3 homolog, SAGA and STAGA complex component                                                   |
| IKBKAP  | inhibitor of kappa light polypeptide gene enhancer in B-cells, kinase complex-associated protein |
| RUVBL1  | RuvB like AAA ATPase 1                                                                           |
| EIF3A   | eukaryotic translation initiation factor 3 subunit A                                             |
| EIF3G   | eukaryotic translation initiation factor 3 subunit G                                             |
| EIF3H   | eukaryotic translation initiation factor 3 subunit H                                             |
| EIF4G3  | eukaryotic translation initiation factor 4 gamma 3                                               |
| HRK     | harakiri, BCL2 interacting protein                                                               |

|         |                                                                                 |
|---------|---------------------------------------------------------------------------------|
| CREG1   | cellular repressor of E1A stimulated genes 1                                    |
| NR112   | nuclear receptor subfamily 1 group I member 2                                   |
| LDB1    | LIM domain binding 1                                                            |
| SQSTM1  | sequestosome 1                                                                  |
| EIF2B2  | eukaryotic translation initiation factor 2B subunit beta                        |
| BUD31   | BUD31 homolog                                                                   |
| RPS6KA4 | ribosomal protein S6 kinase A4                                                  |
| TBX19   | T-box 19                                                                        |
| DYRK1B  | dual specificity tyrosine phosphorylation regulated kinase 1B                   |
| MAP3K13 | mitogen-activated protein kinase kinase kinase 13                               |
| LRRFIP1 | leucine rich repeat (in FLII) interacting protein 1                             |
| KLF4    | Kruppel-like factor 4 (gut)                                                     |
| ZNHIT3  | zinc finger HIT-type containing 3                                               |
| MED21   | mediator complex subunit 21                                                     |
| MED17   | mediator complex subunit 17                                                     |
| MED26   | mediator complex subunit 26                                                     |
| PICK1   | protein interacting with PRKCA 1                                                |
| VPS4B   | vacuolar protein sorting 4 homolog B                                            |
| CIR1    | corepressor interacting with RBPJ, 1                                            |
| H2AFY   | H2A histone family member Y                                                     |
| CREB5   | cAMP responsive element binding protein 5                                       |
| RNF14   | ring finger protein 14                                                          |
| MTRF1   | mitochondrial translational release factor 1                                    |
| HDAC4   | histone deacetylase 4                                                           |
| MAML1   | mastermind like transcriptional coactivator 1                                   |
| ARNT2   | aryl hydrocarbon receptor nuclear translocator 2                                |
| MED13   | mediator complex subunit 13                                                     |
| HDAC5   | histone deacetylase 5                                                           |
| TRIM28  | tripartite motif containing 28                                                  |
| RIDA    | reactive intermediate imine deaminase A homolog                                 |
| SAP18   | Sin3A associated protein 18kDa                                                  |
| CITED2  | Cbp/p300 interacting transactivator with Glu/Asp rich carboxy-terminal domain 2 |
| FST     | follistatin                                                                     |
| TADA3   | transcriptional adaptor 3                                                       |
| MYBBP1A | MYB binding protein 1a                                                          |
| IGF2BP2 | insulin like growth factor 2 mRNA binding protein 2                             |
| CAMKK2  | calcium/calmodulin-dependent protein kinase kinase 2                            |
| KHDRBS1 | KH domain containing, RNA binding, signal transduction associated 1             |
| TCFL5   | transcription factor like 5                                                     |
| ZMYND11 | zinc finger MYND-type containing 11                                             |
| ZNF274  | zinc finger protein 274                                                         |
| ARID5A  | AT-rich interaction domain 5A                                                   |
| BRD8    | bromodomain containing 8                                                        |
| SOX30   | SRY-box 30                                                                      |
| KAT7    | lysine acetyltransferase 7                                                      |
| SOX21   | SRY-box 21                                                                      |
| SNF8    | SNF8, ESCRT-II complex subunit                                                  |
| KLF12   | Kruppel-like factor 12                                                          |
| POU6F2  | POU class 6 homeobox 2                                                          |
| ATF5    | activating transcription factor 5                                               |
| ZHX2    | zinc fingers and homeoboxes 2                                                   |
| TRAK1   | trafficking kinesin protein 1                                                   |
| ATF6    | activating transcription factor 6                                               |
| SCAP    | SREBF chaperone                                                                 |
| SAMD4A  | sterile alpha motif domain containing 4A                                        |
| ERC1    | ELKS/RAB6-interacting/CAST family member 1                                      |
| ZNF423  | zinc finger protein 423                                                         |
| CRTC1   | CREB regulated transcription coactivator 1                                      |



|          |                                                                                                |
|----------|------------------------------------------------------------------------------------------------|
| DICER1   | dicer 1, ribonuclease III                                                                      |
| SIRT5    | sirtuin 5                                                                                      |
| RYBP     | RING1 and YY1 binding protein                                                                  |
| KAT6B    | lysine acetyltransferase 6B                                                                    |
| RBFOX2   | RNA binding protein, fox-1 homolog 2                                                           |
| POU2F3   | POU class 2 homeobox 3                                                                         |
| SIN3A    | SIN3 transcription regulator family member A                                                   |
| EHF      | ETS homologous factor                                                                          |
| NUFIP1   | NUFIP1, FMR1 interacting protein 1                                                             |
| FOXD3    | forkhead box D3                                                                                |
| STK36    | serine/threonine kinase 36                                                                     |
| UHRF1    | ubiquitin like with PHD and ring finger domains 1                                              |
| UBN1     | ubinuclein 1                                                                                   |
| MDFIC    | MyoD family inhibitor domain containing                                                        |
| KCNIP3   | potassium voltage-gated channel interacting protein 3                                          |
| SMARCAL1 | SWI/SNF related, matrix associated, actin dependent regulator of chromatin, subfamily a like 1 |
| NDUFA13  | NADH:ubiquinone oxidoreductase subunit A13                                                     |
| YBX2     | Y-box binding protein 2                                                                        |
| SEPSECS  | Sep (O-phosphoserine) tRNA:Sec (selenocysteine) tRNA synthase                                  |
| PHF21A   | PHD finger protein 21A                                                                         |
| PIAS4    | protein inhibitor of activated STAT 4                                                          |
| SUFU     | SUFU negative regulator of hedgehog signaling                                                  |
| TLR9     | toll like receptor 9                                                                           |
| SOX18    | SRY-box 18                                                                                     |
| DGCR8    | DGCR8 microprocessor complex subunit                                                           |
| EGLN1    | egl-9 family hypoxia inducible factor 1                                                        |
| TRNAU1AP | tRNA selenocysteine 1 associated protein 1                                                     |
| ELP3     | elongator acetyltransferase complex subunit 3                                                  |
| H2AFY2   | H2A histone family member Y2                                                                   |
| MAML3    | mastermind like transcriptional coactivator 3                                                  |
| TRERF1   | transcriptional regulating factor 1                                                            |
| LANCL2   | LanC like 2                                                                                    |
| SLC2A4RG | SLC2A4 regulator                                                                               |
| CTNNBIP1 | catenin beta interacting protein 1                                                             |
| HIVEP3   | human immunodeficiency virus type I enhancer binding protein 3                                 |
| SIGIRR   | single immunoglobulin and toll-interleukin 1 receptor (TIR) domain                             |
| NECAB3   | N-terminal EF-hand calcium binding protein 3                                                   |
| NSD1     | nuclear receptor binding SET domain protein 1                                                  |
| SUDS3    | SDS3 homolog, SIN3A corepressor complex component                                              |
| NARFL    | nuclear prelamin A recognition factor like                                                     |
| BOLL     | boule homolog, RNA binding protein                                                             |
| NAA15    | N(alpha)-acetyltransferase 15, NatA auxiliary subunit                                          |
| ELL3     | elongation factor for RNA polymerase II 3                                                      |
| PBX4     | PBX homeobox 4                                                                                 |
| SCRT1    | scratch family transcriptional repressor 1                                                     |
| PCBD2    | pterin-4 alpha-carbinolamine dehydratase 2                                                     |
| SLA2     | Src-like-adaptor 2                                                                             |
| AKT1S1   | AKT1 substrate 1                                                                               |
| CARD11   | caspase recruitment domain family member 11                                                    |
| MAML2    | mastermind like transcriptional coactivator 2                                                  |
| AFAP1L2  | actin filament associated protein 1 like 2                                                     |
| GLIS2    | GLIS family zinc finger 2                                                                      |
| NLRP3    | NLR family, pyrin domain containing 3                                                          |
| TWIST2   | twist family bHLH transcription factor 2                                                       |
| HEXIM2   | hexamethylene bisacetamide inducible 2                                                         |
| GABPB2   | GA binding protein transcription factor beta subunit 2                                         |
| DMBX1    | diencephalon/mesencephalon homeobox 1                                                          |

|                                         |                                                           |
|-----------------------------------------|-----------------------------------------------------------|
| TAF8                                    | TATA-box binding protein associated factor 8              |
| COMMD7                                  | COMM domain containing 7                                  |
| NFAM1                                   | NFAT activating protein with ITAM motif 1                 |
| EID2                                    | EP300 interacting inhibitor of differentiation 2          |
| GLIS3                                   | GLIS family zinc finger 3                                 |
| ZNF367                                  | zinc finger protein 367                                   |
| NLRC3                                   | NLR family, CARD domain containing 3                      |
| MTIF3                                   | mitochondrial translational initiation factor 3           |
| JMJD1C                                  | jumonji domain containing 1C                              |
| JAZF1                                   | JAZF zinc finger 1                                        |
| ZBTB38                                  | zinc finger and BTB domain containing 38                  |
| PTF1A                                   | pancreas specific transcription factor, 1a                |
| RGMB                                    | repulsive guidance molecule family member b               |
| MAFA                                    | MAF bZIP transcription factor A                           |
| EIF2AK4                                 | eukaryotic translation initiation factor 2 alpha kinase 4 |
| <b>Regulation of catalytic activity</b> |                                                           |
| <b>Gene Symbol</b>                      | <b>Name Gene</b>                                          |
| ABL2                                    | ABL proto-oncogene 2, non-receptor tyrosine kinase        |
| ADRA2A                                  | adrenoceptor alpha 2A                                     |
| ADRB1                                   | adrenoceptor beta 1                                       |
| ANG                                     | angiogenin                                                |
| APAF1                                   | apoptotic peptidase activating factor 1                   |
| APC                                     | adenomatous polyposis coli                                |
| BIRC5                                   | baculoviral IAP repeat containing 5                       |
| CCND1                                   | cyclin D1                                                 |
| FOXL2                                   | forkhead box L2                                           |
| CALCA                                   | calcitonin related polypeptide alpha                      |
| CALCR                                   | calcitonin receptor                                       |
| CASP9                                   | caspase 9                                                 |
| CCKBR                                   | cholecystokinin B receptor                                |
| CCND2                                   | cyclin D2                                                 |
| CCNG1                                   | cyclin G1                                                 |
| CD81                                    | CD81 molecule                                             |
| CDK7                                    | cyclin-dependent kinase 7                                 |
| CDKN1C                                  | cyclin-dependent kinase inhibitor 1C                      |
| CDKN3                                   | cyclin-dependent kinase inhibitor 3                       |
| CHRM1                                   | cholinergic receptor muscarinic 1                         |
| CKS1B                                   | CDC28 protein kinase regulatory subunit 1B                |
| CRHR1                                   | corticotropin releasing hormone receptor 1                |
| DAXX                                    | death-domain associated protein                           |
| GADD45A                                 | growth arrest and DNA damage inducible alpha              |
| DHCR24                                  | 24-dehydrocholesterol reductase                           |
| DUSP2                                   | dual specificity phosphatase 2                            |
| DUSP6                                   | dual specificity phosphatase 6                            |
| EDNRB                                   | endothelin receptor type B                                |
| EGF                                     | epidermal growth factor                                   |
| EGFR                                    | epidermal growth factor receptor                          |
| GABBR1                                  | gamma-aminobutyric acid type B receptor subunit 1         |
| GALR1                                   | galanin receptor 1                                        |
| GHRHR                                   | growth hormone releasing hormone receptor                 |
| GIPR                                    | gastric inhibitory polypeptide receptor                   |
| GNA15                                   | G protein subunit alpha 15                                |
| GNAI2                                   | G protein subunit alpha i2                                |
| GNAS                                    | GNAS complex locus                                        |
| GPS1                                    | G protein pathway suppressor 1                            |
| GRM2                                    | glutamate metabotropic receptor 2                         |
| GRM3                                    | glutamate metabotropic receptor 3                         |

|          |                                                                       |
|----------|-----------------------------------------------------------------------|
| GRM4     | glutamate metabotropic receptor 4                                     |
| GTF2H1   | general transcription factor IIH subunit 1                            |
| HIP1     | huntingtin interacting protein 1                                      |
| LCK      | LCK proto-oncogene, Src family tyrosine kinase                        |
| SMAD3    | SMAD family member 3                                                  |
| MAP3K5   | mitogen-activated protein kinase kinase kinase 5                      |
| MAP3K10  | mitogen-activated protein kinase kinase kinase 10                     |
| NF1      | neurofibromin 1                                                       |
| PAK1     | p21 (RAC1) activated kinase 1                                         |
| PAK2     | p21 (RAC1) activated kinase 2                                         |
| PIK3CB   | phosphatidylinositol-4,5-bisphosphate 3-kinase catalytic subunit beta |
| PMAIP1   | phorbol-12-myristate-13-acetate-induced protein 1                     |
| PRLR     | prolactin receptor                                                    |
| PTEN     | phosphatase and tensin homolog                                        |
| PTPRC    | protein tyrosine phosphatase, receptor type C                         |
| RB1      | retinoblastoma 1                                                      |
| RGS3     | regulator of G-protein signaling 3                                    |
| SHC1     | SHC adaptor protein 1                                                 |
| TARBP2   | TARBP2, RISC loading complex RNA binding subunit                      |
| TGFA     | transforming growth factor alpha                                      |
| TNNT2    | troponin T2, cardiac type                                             |
| TPD52L1  | tumor protein D52-like 1                                              |
| TRAF6    | TNF receptor associated factor 6                                      |
| TSC1     | tuberous sclerosis 1                                                  |
| MADD     | MAP kinase activating death domain                                    |
| PKMYT1   | protein kinase, membrane associated tyrosine/threonine 1              |
| CCNE2    | cyclin E2                                                             |
| LPAR2    | lysophosphatidic acid receptor 2                                      |
| MAP3K13  | mitogen-activated protein kinase kinase kinase 13                     |
| PICK1    | protein interacting with PRKCA 1                                      |
| GABBR2   | gamma-aminobutyric acid type B receptor subunit 2                     |
| CASP8AP2 | caspase 8 associated protein 2                                        |
| DNAJB6   | DnaJ heat shock protein family (Hsp40) member B6                      |
| HIPK3    | homeodomain interacting protein kinase 3                              |
| TRIB1    | tribbles pseudokinase 1                                               |
| NMUR1    | neuromedin U receptor 1                                               |
| TAB1     | TGF-beta activated kinase 1/MAP3K7 binding protein 1                  |
| CAP1     | CAP, adenylate cyclase-associated protein 1 (yeast)                   |
| CAMKK2   | calcium/calmodulin-dependent protein kinase kinase 2                  |
| GADD45G  | growth arrest and DNA damage inducible gamma                          |
| RALBP1   | ralA binding protein 1                                                |
| ADAP1    | ArfGAP with dual PH domains 1                                         |
| CDC37    | cell division cycle 37                                                |
| CBLC     | Cbl proto-oncogene C                                                  |
| FBXO5    | F-box protein 5                                                       |
| LATS2    | large tumor suppressor kinase 2                                       |
| SERTAD1  | SERTA domain containing 1                                             |
| MDFIC    | MyoD family inhibitor domain containing                               |
| MBIP     | MAP3K12 binding inhibitory protein 1                                  |
| ZAK      | sterile alpha motif and leucine zipper containing kinase AZK          |
| IFT57    | intraflagellar transport 57                                           |
| CAND1    | cullin associated and neddylation dissociated 1                       |
| PSENEN   | presenilin enhancer gamma-secretase subunit                           |
| PARD3    | par-3 family cell polarity regulator                                  |
| LTB4R2   | leukotriene B4 receptor 2                                             |
| BCCIP    | BRCA2 and CDKN1A interacting protein                                  |
| DUSP22   | dual specificity phosphatase 22                                       |
| ALS2     | ALS2, alsin Rho guanine nucleotide exchange factor                    |

|                      |                                                           |
|----------------------|-----------------------------------------------------------|
| PIF1                 | PIF1 5'-to-3' DNA helicase                                |
| CDK5RAP3             | CDK5 regulatory subunit associated protein 3              |
| ATPIF1               | ATPase inhibitory factor 1                                |
| NLRP3                | NLR family, pyrin domain containing 3                     |
| ARAP1                | ArfGAP with RhoGAP domain, ankyrin repeat and PH domain 1 |
| HEXIM2               | hexamethylene bisacetamide inducible 2                    |
| AIFM3                | apoptosis inducing factor, mitochondria associated 3      |
| FGD5                 | FYVE, RhoGEF and PH domain containing 5                   |
| SPRED2               | sprouty related EVH1 domain containing 2                  |
| ARHGAP27             | Rho GTPase activating protein 27                          |
| FGD2                 | FYVE, RhoGEF and PH domain containing 2                   |
| CRIPAK               | cysteine rich PAK1 inhibitor                              |
| SERINC2              | serine incorporator 2                                     |
| <b>Transcription</b> |                                                           |
| <b>Gene Symbol</b>   | <b>Name Gene</b>                                          |
| ABCA2                | ATP binding cassette subfamily A member 2                 |
| ACVR1                | activin A receptor type 1                                 |
| ACVR2B               | activin A receptor type 2B                                |
| ACVRL1               | activin A receptor like type 1                            |
| PARP1                | poly(ADP-ribose) polymerase 1                             |
| AHR                  | aryl hydrocarbon receptor                                 |
| ANG                  | angiogenin                                                |
| APBB1                | amyloid beta precursor protein binding family B member 1  |
| APBB2                | amyloid beta precursor protein binding family B member 2  |
| APEX1                | apurinic/apyrimidinic endodeoxyribonuclease 1             |
| ARNTL                | aryl hydrocarbon receptor nuclear translocator like       |
| ZFH3                 | zinc finger homeobox 3                                    |
| ATF4                 | activating transcription factor 4                         |
| NKX3-2               | NK3 homeobox 2                                            |
| BCL3                 | B-cell CLL/lymphoma 3                                     |
| BCL6                 | B-cell CLL/lymphoma 6                                     |
| PRDM1                | PR domain 1                                               |
| BMP2                 | bone morphogenetic protein 2                              |
| BMP6                 | bone morphogenetic protein 6                              |
| BRCA1                | breast cancer 1                                           |
| BTF3                 | basic transcription factor 3                              |
| CALCA                | calcitonin related polypeptide alpha                      |
| CALR                 | calreticulin                                              |
| CAMK2A               | calcium/calmodulin dependent protein kinase II alpha      |
| RUNX2                | runt related transcription factor 2                       |
| RUNX1                | runt related transcription factor 1                       |
| RUNX3                | runt related transcription factor 3                       |
| CBFB                 | core-binding factor, beta subunit                         |
| CDK7                 | cyclin-dependent kinase 7                                 |
| CEBPA                | CCAAT/enhancer binding protein alpha                      |
| CEBPB                | CCAAT/enhancer binding protein beta                       |
| CENPF                | centromere protein F                                      |
| CHD3                 | chromodomain helicase DNA binding protein 3               |
| FOXN3                | forkhead box N3                                           |
| CREBBP               | CREB binding protein                                      |
| CREM                 | cAMP responsive element modulator                         |
| NKX2-5               | NK2 homeobox 5                                            |
| CUX1                 | cut like homeobox 1                                       |
| DAXX                 | death-domain associated protein                           |
| DBP                  | D-box binding PAR bZIP transcription factor               |
| DNMT1                | DNA (cytosine-5-)-methyltransferase 1                     |
| DTX1                 | deltex 1                                                  |

|         |                                                                            |
|---------|----------------------------------------------------------------------------|
| E2F2    | E2F transcription factor 2                                                 |
| E2F3    | E2F transcription factor 3                                                 |
| ELAVL2  | ELAV like neuron-specific RNA binding protein 2                            |
| ELF2    | E74 like ETS transcription factor 2                                        |
| ELK3    | ELK3, ETS transcription factor                                             |
| EP300   | E1A binding protein p300                                                   |
| EPAS1   | endothelial PAS domain protein 1                                           |
| ERCC3   | excision repair cross-complementation group 3                              |
| ERCC6   | excision repair cross-complementation group 6                              |
| ERF     | ETS2 repressor factor                                                      |
| ESRRG   | estrogen related receptor gamma                                            |
| EZH2    | enhancer of zeste 2 polycomb repressive complex 2 subunit                  |
| BPTF    | bromodomain PHD finger transcription factor                                |
| FOXF1   | forkhead box F1                                                            |
| FOXF2   | forkhead box F2                                                            |
| FOXE3   | forkhead box E3                                                            |
| FOXO1   | forkhead box O1                                                            |
| FOSL2   | FOS like 2, AP-1 transcription factor subunit                              |
| NR5A2   | nuclear receptor subfamily 5 group A member 2                              |
| NR5A1   | nuclear receptor subfamily 5 group A member 1                              |
| XRCC6   | X-ray repair complementing defective repair in Chinese hamster cells 6     |
| GATA2   | GATA binding protein 2                                                     |
| GATA3   | GATA binding protein 3                                                     |
| GATA4   | GATA binding protein 4                                                     |
| GATA6   | GATA binding protein 6                                                     |
| KAT2A   | lysine acetyltransferase 2A                                                |
| NR6A1   | nuclear receptor subfamily 6 group A member 1                              |
| GFI1    | growth factor independent 1 transcriptional repressor                      |
| GCLC    | glutamate-cysteine ligase catalytic subunit                                |
| GLI2    | GLI family zinc finger 2                                                   |
| NR3C1   | nuclear receptor subfamily 3 group C member 1                              |
| GSC2    | goosecoid homeobox 2                                                       |
| GTF2B   | general transcription factor IIB                                           |
| GTF2H1  | general transcription factor IIH subunit 1                                 |
| GTF2I   | general transcription factor Iii                                           |
| BRF1    | BRF1, RNA polymerase III transcription initiation factor 90 kDa subunit    |
| HDAC2   | histone deacetylase 2                                                      |
| NRG1    | neuregulin 1                                                               |
| HIC1    | hypermethylated in cancer 1                                                |
| MNX1    | motor neuron and pancreas homeobox 1                                       |
| HMGB1   | high mobility group box 1                                                  |
| HMGB2   | high mobility group box 2                                                  |
| HMGA1   | high mobility group AT-hook 1                                              |
| HNF4A   | hepatocyte nuclear factor 4 alpha                                          |
| HNF4G   | hepatocyte nuclear factor 4 gamma                                          |
| HNRNPAB | heterogeneous nuclear ribonucleoprotein A/B                                |
| HOXC6   | homeobox C6                                                                |
| IRF8    | interferon regulatory factor 8                                             |
| ID2     | inhibitor of DNA binding 2, HLH protein                                    |
| ID3     | inhibitor of DNA binding 3, HLH protein                                    |
| ID4     | inhibitor of DNA binding 4, HLH protein                                    |
| IKBKB   | inhibitor of kappa light polypeptide gene enhancer in B-cells, kinase beta |
| FOXP2   | forkhead box K2                                                            |
| ILF2    | interleukin enhancer binding factor 2                                      |
| ILF3    | interleukin enhancer binding factor 3                                      |
| ING2    | inhibitor of growth family member 2                                        |
| INHBA   | inhibin beta A                                                             |
| IRF1    | interferon regulatory factor 1                                             |

|         |                                                                           |
|---------|---------------------------------------------------------------------------|
| IRF2    | interferon regulatory factor 2                                            |
| IRF4    | interferon regulatory factor 4                                            |
| IRF7    | interferon regulatory factor 7                                            |
| LMX1B   | LIM homeobox transcription factor 1 beta                                  |
| SMAD2   | SMAD family member 2                                                      |
| SMAD3   | SMAD family member 3                                                      |
| MAX     | MYC associated factor X                                                   |
| MEIS2   | Meis homeobox 2                                                           |
| MEN1    | menin 1                                                                   |
| MLLT1   | myeloid/lymphoid or mixed-lineage leukemia; translocated to, 1            |
| MLLT6   | myeloid/lymphoid or mixed-lineage leukemia; translocated to, 6            |
| MYC     | v-myc avian myelocytomatosis viral oncogene homolog                       |
| MYCN    | v-myc avian myelocytomatosis viral oncogene neuroblastoma derived homolog |
| MYO6    | myosin VI                                                                 |
| MYOD1   | myogenic differentiation 1                                                |
| NEUROD2 | neuronal differentiation 2                                                |
| NEUROG1 | neurogenin 1                                                              |
| NFATC1  | nuclear factor of activated T-cells 1                                     |
| NFATC2  | nuclear factor of activated T-cells 2                                     |
| NFATC4  | nuclear factor of activated T-cells 4                                     |
| NFIC    | nuclear factor I C                                                        |
| NFIX    | nuclear factor I X                                                        |
| NFKB1   | nuclear factor kappa B subunit 1                                          |
| NFKBIB  | NFKB inhibitor beta                                                       |
| NFRKB   | nuclear factor related to kappaB binding protein                          |
| NFYA    | nuclear transcription factor Y subunit alpha                              |
| NFYC    | nuclear transcription factor Y subunit gamma                              |
| NOTCH4  | notch 4                                                                   |
| NPAS2   | neuronal PAS domain protein 2                                             |
| NRF1    | nuclear respiratory factor 1                                              |
| NRL     | neural retina leucine zipper                                              |
| PAWR    | pro-apoptotic WT1 regulator                                               |
| PAX1    | paired box 1                                                              |
| PAX2    | paired box 2                                                              |
| PBX1    | PBX homeobox 1                                                            |
| PBX3    | PBX homeobox 3                                                            |
| PER1    | period circadian clock 1                                                  |
| PEX14   | peroxisomal biogenesis factor 14                                          |
| PFDN5   | prefoldin subunit 5                                                       |
| PITX2   | paired like homeodomain 2                                                 |
| PLAGL1  | PLAG1 like zinc finger 1                                                  |
| POLR2D  | polymerase (RNA) II subunit D                                             |
| POLR2F  | polymerase (RNA) II subunit F                                             |
| POLR2G  | polymerase (RNA) II subunit G                                             |
| POLR2H  | polymerase (RNA) II subunit H                                             |
| POLR2J  | polymerase (RNA) II subunit J                                             |
| POLRMT  | polymerase (RNA) mitochondrial                                            |
| POU2AF1 | POU class 2 associating factor 1                                          |
| POU2F1  | POU class 2 homeobox 1                                                    |
| POU5F1  | POU class 5 homeobox 1                                                    |
| PPARA   | peroxisome proliferator activated receptor alpha                          |
| PPARD   | peroxisome proliferator activated receptor delta                          |
| PPARG   | peroxisome proliferator activated receptor gamma                          |
| PPP5C   | protein phosphatase 5 catalytic subunit                                   |
| PSMC5   | proteasome 26S subunit, ATPase 5                                          |
| PTGER3  | prostaglandin E receptor 3                                                |
| PTMA    | prothymosin, alpha                                                        |
| RB1     | retinoblastoma 1                                                          |

|         |                                                                                                   |
|---------|---------------------------------------------------------------------------------------------------|
| RBBP8   | retinoblastoma binding protein 8                                                                  |
| RELA    | RELA proto-oncogene, NF-kB subunit                                                                |
| REST    | RE1 silencing transcription factor                                                                |
| TRIM27  | tripartite motif containing 27                                                                    |
| RNF4    | ring finger protein 4                                                                             |
| RORB    | RAR related orphan receptor B                                                                     |
| RREB1   | ras responsive element binding protein 1                                                          |
| RXRA    | retinoid X receptor alpha                                                                         |
| ATXN1   | ataxin 1                                                                                          |
| SNAI2   | snail family transcriptional repressor 2                                                          |
| SMARCA2 | SWI/SNF related, matrix associated, actin dependent regulator of chromatin, subfamily a, member 2 |
| SMARCD2 | SWI/SNF related, matrix associated, actin dependent regulator of chromatin, subfamily d, member 2 |
| SMARCE1 | SWI/SNF related, matrix associated, actin dependent regulator of chromatin, subfamily e, member 1 |
| SNAPC2  | small nuclear RNA activating complex polypeptide 2                                                |
| SNAPC3  | small nuclear RNA activating complex polypeptide 3                                                |
| SOD2    | superoxide dismutase 2, mitochondrial                                                             |
| SP1     | Sp1 transcription factor                                                                          |
| SP2     | Sp2 transcription factor                                                                          |
| SP3     | Sp3 transcription factor                                                                          |
| SP100   | SP100 nuclear antigen                                                                             |
| SPI1    | Spi-1 proto-oncogene                                                                              |
| SPIB    | Spi-B transcription factor                                                                        |
| SREBF1  | sterol regulatory element binding transcription factor 1                                          |
| SREBF2  | sterol regulatory element binding transcription factor 2                                          |
| SUPT5H  | SPT5 homolog, DSIF elongation factor subunit                                                      |
| TAF5    | TATA-box binding protein associated factor 5                                                      |
| TARBP1  | TAR (HIV-1) RNA binding protein 1                                                                 |
| TARBP2  | TARBP2, RISC loading complex RNA binding subunit                                                  |
| TBP     | TATA-box binding protein                                                                          |
| TBX5    | T-box 5                                                                                           |
| TCEB1   | transcription elongation factor B subunit 1                                                       |
| TCEB2   | transcription elongation factor B subunit 2                                                       |
| TBX3    | T-box 3                                                                                           |
| HNF1A   | HNF1 homeobox A                                                                                   |
| HNF1B   | HNF1 homeobox B                                                                                   |
| TCF3    | transcription factor 3                                                                            |
| TCF7L2  | transcription factor 7 like 2                                                                     |
| ZEB1    | zinc finger E-box binding homeobox 1                                                              |
| TCF12   | transcription factor 12                                                                           |
| ZNF354A | zinc finger protein 354A                                                                          |
| TCF19   | transcription factor 19                                                                           |
| VPS72   | vacuolar protein sorting 72 homolog                                                               |
| TFAP2A  | transcription factor AP-2 alpha                                                                   |
| TFAP2B  | transcription factor AP-2 beta                                                                    |
| NR2F2   | nuclear receptor subfamily 2 group F member 2                                                     |
| TFDP1   | transcription factor Dp-1                                                                         |
| TGFB1   | transforming growth factor beta 1                                                                 |
| TGIF1   | TGFB induced factor homeobox 1                                                                    |
| KLF10   | Kruppel-like factor 10                                                                            |
| TIAL1   | TIA1 cytotoxic granule-associated RNA binding protein-like 1                                      |
| TNF     | tumor necrosis factor                                                                             |
| TP73    | tumor protein p73                                                                                 |
| TRPS1   | transcriptional repressor GATA binding 1                                                          |
| HIRA    | histone cell cycle regulator                                                                      |
| TWIST1  | twist family bHLH transcription factor 1                                                          |

|         |                                                                                                  |
|---------|--------------------------------------------------------------------------------------------------|
| UBB     | ubiquitin B                                                                                      |
| UBTF    | upstream binding transcription factor, RNA polymerase I                                          |
| NR1H2   | nuclear receptor subfamily 1 group H member 2                                                    |
| USF1    | upstream transcription factor 1                                                                  |
| YY1     | YY1 transcription factor                                                                         |
| YWHAH   | tyrosine 3-monooxygenase/tryptophan 5-monooxygenase activation protein eta                       |
| ZNF45   | zinc finger protein 45                                                                           |
| ZNF74   | zinc finger protein 74                                                                           |
| ZBTB16  | zinc finger and BTB domain containing 16                                                         |
| ZNF146  | zinc finger protein 146                                                                          |
| ZNF148  | zinc finger protein 148                                                                          |
| ZNF174  | zinc finger protein 174                                                                          |
| PAX8    | paired box 8                                                                                     |
| KAT6A   | lysine acetyltransferase 6A                                                                      |
| ALX1    | ALX homeobox 1                                                                                   |
| ELL     | elongation factor for RNA polymerase II                                                          |
| ARID1A  | AT-rich interaction domain 1A                                                                    |
| ZNF282  | zinc finger protein 282                                                                          |
| KLF11   | Kruppel-like factor 11                                                                           |
| SUPT3H  | SPT3 homolog, SAGA and STAGA complex component                                                   |
| IKBKAP  | inhibitor of kappa light polypeptide gene enhancer in B-cells, kinase complex-associated protein |
| RUVBL1  | RuvB like AAA ATPase 1                                                                           |
| EDF1    | endothelial differentiation related factor 1                                                     |
| CREG1   | cellular repressor of E1A stimulated genes 1                                                     |
| TRIM24  | tripartite motif containing 24                                                                   |
| TSC22D1 | TSC22 domain family member 1                                                                     |
| NR1I2   | nuclear receptor subfamily 1 group I member 2                                                    |
| LDB1    | LIM domain binding 1                                                                             |
| SQSTM1  | sequestosome 1                                                                                   |
| FUBP1   | far upstream element binding protein 1                                                           |
| BUD31   | BUD31 homolog                                                                                    |
| RPS6KA4 | ribosomal protein S6 kinase A4                                                                   |
| ASH2L   | ASH2 like histone lysine methyltransferase complex subunit                                       |
| TBX19   | T-box 19                                                                                         |
| NMI     | N-myc and STAT interactor                                                                        |
| DYRK1B  | dual specificity tyrosine phosphorylation regulated kinase 1B                                    |
| MAP3K13 | mitogen-activated protein kinase kinase kinase 13                                                |
| LRRFIP1 | leucine rich repeat (in FLII) interacting protein 1                                              |
| PTTG1   | pituitary tumor-transforming 1                                                                   |
| MSC     | musculin                                                                                         |
| KLF4    | Kruppel-like factor 4 (gut)                                                                      |
| TRIP13  | thyroid hormone receptor interactor 13                                                           |
| TRIP11  | thyroid hormone receptor interactor 11                                                           |
| ZNHIT3  | zinc finger HIT-type containing 3                                                                |
| MED21   | mediator complex subunit 21                                                                      |
| MED17   | mediator complex subunit 17                                                                      |
| MED26   | mediator complex subunit 26                                                                      |
| HAND2   | heart and neural crest derivatives expressed 2                                                   |
| VPS4B   | vacuolar protein sorting 4 homolog B                                                             |
| POLR1C  | polymerase (RNA) I subunit C                                                                     |
| CIR1    | corepressor interacting with RBPJ, 1                                                             |
| CREB5   | cAMP responsive element binding protein 5                                                        |
| NFE2L3  | nuclear factor, erythroid 2 like 3                                                               |
| RNF14   | ring finger protein 14                                                                           |
| HDAC4   | histone deacetylase 4                                                                            |
| MAML1   | mastermind like transcriptional coactivator 1                                                    |
| MED24   | mediator complex subunit 24                                                                      |



|          |                                                                                 |
|----------|---------------------------------------------------------------------------------|
| ARNT2    | aryl hydrocarbon receptor nuclear translocator 2                                |
| MED13    | mediator complex subunit 13                                                     |
| HDAC5    | histone deacetylase 5                                                           |
| MED16    | mediator complex subunit 16                                                     |
| TRIM28   | tripartite motif containing 28                                                  |
| SAP18    | Sin3A associated protein 18kDa                                                  |
| CITED2   | Cbp/p300 interacting transactivator with Glu/Asp rich carboxy-terminal domain 2 |
| FST      | follistatin                                                                     |
| TADA3    | transcriptional adaptor 3                                                       |
| MYBBP1A  | MYB binding protein 1a                                                          |
| DEAF1    | DEAF1, transcription factor                                                     |
| KAT5     | lysine acetyltransferase 5                                                      |
| IVNS1ABP | influenza virus NS1A binding protein                                            |
| CAMKK2   | calcium/calmodulin-dependent protein kinase kinase 2                            |
| KHDRBS1  | KH domain containing, RNA binding, signal transduction associated 1             |
| TCFL5    | transcription factor like 5                                                     |
| ZMYND11  | zinc finger MYND-type containing 11                                             |
| ZNF274   | zinc finger protein 274                                                         |
| CD3EAP   | CD3e molecule associated protein                                                |
| ARID5A   | AT-rich interaction domain 5A                                                   |
| PPARGC1A | PPARG coactivator 1 alpha                                                       |
| BRD8     | bromodomain containing 8                                                        |
| RNPS1    | RNA binding protein with serine rich domain 1                                   |
| ADRM1    | adhesion regulating molecule 1                                                  |
| SOX30    | SRY-box 30                                                                      |
| PRDM4    | PR domain 4                                                                     |
| KAT7     | lysine acetyltransferase 7                                                      |
| SOX21    | SRY-box 21                                                                      |
| SNF8     | SNF8, ESCRT-II complex subunit                                                  |
| KLF12    | Kruppel-like factor 12                                                          |
| POU6F2   | POU class 6 homeobox 2                                                          |
| ATF5     | activating transcription factor 5                                               |
| ZHX2     | zinc fingers and homeoboxes 2                                                   |
| TRAK1    | trafficking kinesin protein 1                                                   |
| ATF6     | activating transcription factor 6                                               |
| SCAP     | SREBF chaperone                                                                 |
| ERC1     | ELKS/RAB6-interacting/CAST family member 1                                      |
| ZNF423   | zinc finger protein 423                                                         |
| CRTC1    | CREB regulated transcription coactivator 1                                      |
| SIRT5    | sirtuin 5                                                                       |
| RYBP     | RING1 and YY1 binding protein                                                   |
| KAT6B    | lysine acetyltransferase 6B                                                     |
| RBFOX2   | RNA binding protein, fox-1 homolog 2                                            |
| TRIM29   | tripartite motif containing 29                                                  |
| POU2F3   | POU class 2 homeobox 3                                                          |
| SIN3A    | SIN3 transcription regulator family member A                                    |
| GMEB2    | glucocorticoid modulatory element binding protein 2                             |
| EHF      | ETS homologous factor                                                           |
| NUFIP1   | NUFIP1, FMR1 interacting protein 1                                              |
| FOXD3    | forkhead box D3                                                                 |
| STK36    | serine/threonine kinase 36                                                      |
| MED4     | mediator complex subunit 4                                                      |
| UHRF1    | ubiquitin like with PHD and ring finger domains 1                               |
| ABT1     | activator of basal transcription 1                                              |
| UBN1     | ubinuclein 1                                                                    |
| MDFIC    | MyoD family inhibitor domain containing                                         |
| KCNIP3   | potassium voltage-gated channel interacting protein 3                           |
| SMARCAL1 | SWI/SNF related, matrix associated, actin dependent regulator of chromatin,     |

|           |                                                                    |
|-----------|--------------------------------------------------------------------|
|           | subfamily a like 1                                                 |
| MYEF2     | myelin expression factor 2                                         |
| NDUFA13   | NADH:ubiquinone oxidoreductase subunit A13                         |
| YBX2      | Y-box binding protein 2                                            |
| PHF21A    | PHD finger protein 21A                                             |
| PIAS4     | protein inhibitor of activated STAT 4                              |
| KLF13     | Kruppel-like factor 13                                             |
| SUFU      | SUFU negative regulator of hedgehog signaling                      |
| POLR3K    | polymerase (RNA) III subunit K                                     |
| SOX18     | SRY-box 18                                                         |
| EGLN1     | egl-9 family hypoxia inducible factor 1                            |
| FEV       | FEV, ETS transcription factor                                      |
| ELP3      | elongator acetyltransferase complex subunit 3                      |
| ARHGEF10L | Rho guanine nucleotide exchange factor 10 like                     |
| MAML3     | mastermind like transcriptional coactivator 3                      |
| TRERF1    | transcriptional regulating factor 1                                |
| ASH1L     | ASH1 like histone lysine methyltransferase                         |
| LANCL2    | LanC like 2                                                        |
| SLC2A4RG  | SLC2A4 regulator                                                   |
| CTNNBIP1  | catenin beta interacting protein 1                                 |
| MKL2      | MKL1/myocardin like 2                                              |
| HIVEP3    | human immunodeficiency virus type I enhancer binding protein 3     |
| SIGIRR    | single immunoglobulin and toll-interleukin 1 receptor (TIR) domain |
| APOBEC3G  | apolipoprotein B mRNA editing enzyme catalytic subunit 3G          |
| NOD2      | nucleotide binding oligomerization domain containing 2             |
| NSD1      | nuclear receptor binding SET domain protein 1                      |
| SUDS3     | SDS3 homolog, SIN3A corepressor complex component                  |
| NARFL     | nuclear prelamin A recognition factor like                         |
| NAA15     | N(alpha)-acetyltransferase 15, NatA auxiliary subunit              |
| ELL3      | elongation factor for RNA polymerase II 3                          |
| PBX4      | PBX homeobox 4                                                     |
| SCRT1     | scratch family transcriptional repressor 1                         |
| PCBD2     | pterin-4 alpha-carbinolamine dehydratase 2                         |
| SLA2      | Src-like-adaptor 2                                                 |
| CARD11    | caspase recruitment domain family member 11                        |
| MAML2     | mastermind like transcriptional coactivator 2                      |
| AFAP1L2   | actin filament associated protein 1 like 2                         |
| GLIS2     | GLIS family zinc finger 2                                          |
| GTF3C6    | general transcription factor IIIC subunit 6                        |
| NLRP3     | NLR family, pyrin domain containing 3                              |
| TWIST2    | twist family bHLH transcription factor 2                           |
| HEXIM2    | hexamethylene bisacetamide inducible 2                             |
| GABPB2    | GA binding protein transcription factor beta subunit 2             |
| DMBX1     | diencephalon/mesencephalon homeobox 1                              |
| TAF8      | TATA-box binding protein associated factor 8                       |
| GLIS1     | GLIS family zinc finger 1                                          |
| COMMD7    | COMM domain containing 7                                           |
| NFAM1     | NFAT activating protein with ITAM motif 1                          |
| EID2      | EP300 interacting inhibitor of differentiation 2                   |
| GLIS3     | GLIS family zinc finger 3                                          |
| ZNF367    | zinc finger protein 367                                            |
| NLRC3     | NLR family, CARD domain containing 3                               |
| JMJD1C    | jumonji domain containing 1C                                       |
| JAZF1     | JAZF zinc finger 1                                                 |
| ZBTB38    | zinc finger and BTB domain containing 38                           |
| PTF1A     | pancreas specific transcription factor, 1a                         |
| RGMB      | repulsive guidance molecule family member b                        |
| MAFA      | MAF bZIP transcription factor A                                    |

| <b>Central Nervous system development</b> |                                                             |
|-------------------------------------------|-------------------------------------------------------------|
| <b>Gene Symbol</b>                        | <b>Name Gene</b>                                            |
| ALDH3A2                                   | aldehyde dehydrogenase 3 family member A2                   |
| CLN5                                      | ceroid-lipofuscinosis, neuronal 5                           |
| DLX2                                      | distal-less homeobox 2                                      |
| RCAN1                                     | regulator of calcineurin 1                                  |
| EGR2                                      | early growth response 2                                     |
| FOXP2                                     | forkhead box P2                                             |
| FOXP1                                     | forkhead box P1                                             |
| GLI2                                      | GLI family zinc finger 2                                    |
| JARID2                                    | jumonji and AT-rich interaction domain containing 2         |
| MAL                                       | mal, T-cell differentiation protein                         |
| MBP                                       | myelin basic protein                                        |
| MOG                                       | myelin oligodendrocyte glycoprotein                         |
| NF1                                       | neurofibromin 1                                             |
| NHLH2                                     | nescient helix-loop-helix 2                                 |
| NPTX1                                     | neuronal pentraxin 1                                        |
| OTX2                                      | orthodenticle homeobox 2                                    |
| PAX6                                      | paired box 6                                                |
| PBX1                                      | PBX homeobox 1                                              |
| PBX3                                      | PBX homeobox 3                                              |
| POU3F3                                    | POU class 3 homeobox 3                                      |
| POU6F1                                    | POU class 6 homeobox 1                                      |
| PROP1                                     | PROP paired-like homeobox 1                                 |
| PTEN                                      | phosphatase and tensin homolog                              |
| PTPRZ1                                    | protein tyrosine phosphatase, receptor type Z1              |
| PTS                                       | 6-pyruvoyltetrahydropterin synthase                         |
| ROBO2                                     | roundabout guidance receptor 2                              |
| SH3GL2                                    | SH3 domain containing GRB2 like 2, endophilin A1            |
| SH3GL3                                    | SH3 domain containing GRB2 like endophilin A3               |
| SHH                                       | sonic hedgehog                                              |
| SIX3                                      | SIX homeobox 3                                              |
| SLIT1                                     | slit guidance ligand 1                                      |
| SLIT3                                     | slit guidance ligand 3                                      |
| ZIC1                                      | Zic family member 1                                         |
| ZIC2                                      | Zic family member 2                                         |
| ZBTB16                                    | zinc finger and BTB domain containing 16                    |
| ALX1                                      | ALX homeobox 1                                              |
| EIF2B3                                    | eukaryotic translation initiation factor 2B subunit gamma   |
| EIF2B2                                    | eukaryotic translation initiation factor 2B subunit beta    |
| PITPNM1                                   | phosphatidylinositol transfer protein membrane associated 1 |
| CELSR1                                    | cadherin EGF LAG seven-pass G-type receptor 1               |
| ECE2                                      | endothelin converting enzyme 2                              |
| ARNT2                                     | aryl hydrocarbon receptor nuclear translocator 2            |
| NCKAP1                                    | NCK associated protein 1                                    |
| PPP1R17                                   | protein phosphatase 1 regulatory subunit 17                 |
| POU6F2                                    | POU class 6 homeobox 2                                      |
| LHX6                                      | LIM homeobox 6                                              |
| SOX8                                      | SRY-box 8                                                   |
| SNTG2                                     | syntrophin gamma 2                                          |
| PCDH18                                    | protocadherin 18                                            |
| PDGFC                                     | platelet derived growth factor C                            |
| DSCAML1                                   | DS cell adhesion molecule like 1                            |
| PBX4                                      | PBX homeobox 4                                              |
| FOXP2                                     | forkhead box P2                                             |
| DMBX1                                     | diencephalon/mesencephalon homeobox 1                       |
| CNTN4                                     | contactin 4                                                 |
| MDGA1                                     | MAM domain containing glycosylphosphatidylinositol anchor 1 |

| <b>Nervous system development</b> |                                                          |
|-----------------------------------|----------------------------------------------------------|
| <b>Gene Symbol</b>                | <b>Name Gene</b>                                         |
| ADORA1                            | adenosine A1 receptor                                    |
| ALDH3A2                           | aldehyde dehydrogenase 3 family member A2                |
| APAF1                             | apoptotic peptidase activating factor 1                  |
| APBA1                             | amyloid beta precursor protein binding family A member 1 |
| APBA2                             | amyloid beta precursor protein binding family A member 2 |
| ATP2B2                            | ATPase plasma membrane Ca <sup>2+</sup> transporting 2   |
| BDNF                              | brain-derived neurotrophic factor                        |
| CD9                               | CD9 molecule                                             |
| CDK6                              | cyclin-dependent kinase 6                                |
| CHRM1                             | cholinergic receptor muscarinic 1                        |
| CHRM2                             | cholinergic receptor muscarinic 2                        |
| CHRM3                             | cholinergic receptor muscarinic 3                        |
| CHRNA4                            | cholinergic receptor nicotinic alpha 4 subunit           |
| CLN5                              | ceroid-lipofuscinosis, neuronal 5                        |
| CNTFR                             | ciliary neurotrophic factor receptor                     |
| CRMP1                             | collapsin response mediator protein 1                    |
| DLG4                              | discs large homolog 4                                    |
| DLX2                              | distal-less homeobox 2                                   |
| DLX5                              | distal-less homeobox 5                                   |
| DPYSL2                            | dihydropyrimidinase like 2                               |
| DRD2                              | dopamine receptor D2                                     |
| ATN1                              | atrophin 1                                               |
| RCAN1                             | regulator of calcineurin 1                               |
| DTX1                              | deltex 1                                                 |
| DVL3                              | dishevelled segment polarity protein 3                   |
| EFNA5                             | ephrin A5                                                |
| EGR2                              | early growth response 2                                  |
| EP300                             | E1A binding protein p300                                 |
| EPHB1                             | EPH receptor B1                                          |
| EPHB2                             | EPH receptor B2                                          |
| CLN8                              | ceroid-lipofuscinosis, neuronal 8                        |
| BPTF                              | bromodomain PHD finger transcription factor              |
| FGF5                              | fibroblast growth factor 5                               |
| FGF11                             | fibroblast growth factor 11                              |
| FGF12                             | fibroblast growth factor 12                              |
| FGF14                             | fibroblast growth factor 14                              |
| FOXP1                             | forkhead box G1                                          |
| GDNF                              | glial cell derived neurotrophic factor                   |
| GLI2                              | GLI family zinc finger 2                                 |
| CXCL1                             | C-X-C motif chemokine ligand 1                           |
| GSTP1                             | glutathione S-transferase pi 1                           |
| JARID2                            | jumonji and AT-rich interaction domain containing 2      |
| KCNQ2                             | potassium voltage-gated channel subfamily Q member 2     |
| LAMB1                             | laminin subunit beta 1                                   |
| LHX1                              | LIM homeobox 1                                           |
| LMX1B                             | LIM homeobox transcription factor 1 beta                 |
| LSAMP                             | limbic system-associated membrane protein                |
| LY6H                              | lymphocyte antigen 6 complex, locus H                    |
| MAL                               | mal, T-cell differentiation protein                      |
| MAPT                              | microtubule associated protein tau                       |
| MBNL1                             | muscleblind like splicing regulator 1                    |
| MBP                               | myelin basic protein                                     |
| MOG                               | myelin oligodendrocyte glycoprotein                      |
| NAB2                              | NGFI-A binding protein 2                                 |
| NEUROD2                           | neuronal differentiation 2                               |

|          |                                                                              |
|----------|------------------------------------------------------------------------------|
| NEUROG1  | neurogenin 1                                                                 |
| NF1      | neurofibromin 1                                                              |
| NF2      | neurofibromin 2 (merlin)                                                     |
| NHLH2    | nescient helix-loop-helix 2                                                  |
| NPAS2    | neuronal PAS domain protein 2                                                |
| NPTX1    | neuronal pentraxin 1                                                         |
| NRCAM    | neuronal cell adhesion molecule                                              |
| NRGN     | neurogranin                                                                  |
| NTF3     | neurotrophin 3                                                               |
| OTX2     | orthodenticle homeobox 2                                                     |
| PAFAH1B1 | platelet activating factor acetylhydrolase 1b regulatory subunit 1           |
| PAX2     | paired box 2                                                                 |
| PAX6     | paired box 6                                                                 |
| PBX1     | PBX homeobox 1                                                               |
| PBX3     | PBX homeobox 3                                                               |
| PHYH     | phytanoyl-CoA 2-hydroxylase                                                  |
| POU3F3   | POU class 3 homeobox 3                                                       |
| POU6F1   | POU class 6 homeobox 1                                                       |
| PPARD    | peroxisome proliferator activated receptor delta                             |
| PROP1    | PROP paired-like homeobox 1                                                  |
| PTEN     | phosphatase and tensin homolog                                               |
| PTN      | pleiotrophin                                                                 |
| PTPRZ1   | protein tyrosine phosphatase, receptor type Z1                               |
| PTS      | 6-pyruvoyltetrahydropterin synthase                                          |
| ROBO1    | roundabout guidance receptor 1                                               |
| ROBO2    | roundabout guidance receptor 2                                               |
| SCN8A    | sodium voltage-gated channel alpha subunit 8                                 |
| SH3GL2   | SH3 domain containing GRB2 like 2, endophilin A1                             |
| SH3GL3   | SH3 domain containing GRB2 like endophilin A3                                |
| SHH      | sonic hedgehog                                                               |
| SIAH1    | siah E3 ubiquitin protein ligase 1                                           |
| SIM1     | single-minded family bHLH transcription factor 1                             |
| SIM2     | single-minded family bHLH transcription factor 2                             |
| SIX3     | SIX homeobox 3                                                               |
| SLIT1    | slit guidance ligand 1                                                       |
| SLIT3    | slit guidance ligand 3                                                       |
| SMPD1    | sphingomyelin phosphodiesterase 1                                            |
| SOX11    | SRY-box 11                                                                   |
| SPG7     | SPG7, paraplegin matrix AAA peptidase subunit                                |
| SPOCK1   | sparc/osteonectin, cwcv and kazal-like domains proteoglycan (testican) 1     |
| TFAP2B   | transcription factor AP-2 beta                                               |
| TGFB2    | transforming growth factor beta 2                                            |
| NR2E1    | nuclear receptor subfamily 2 group E member 1                                |
| UBB      | ubiquitin B                                                                  |
| VEGFA    | vascular endothelial growth factor A                                         |
| YWHAG    | tyrosine 3-monooxygenase/tryptophan 5-monooxygenase activation protein gamma |
| YWHAH    | tyrosine 3-monooxygenase/tryptophan 5-monooxygenase activation protein eta   |
| ZIC1     | Zic family member 1                                                          |
| ZIC2     | Zic family member 2                                                          |
| ZBTB16   | zinc finger and BTB domain containing 16                                     |
| SEMA3B   | semaphorin 3B                                                                |
| ALX1     | ALX homeobox 1                                                               |
| ST8SIA2  | ST8 alpha-N-acetyl-neuraminide alpha-2,8-sialyltransferase 2                 |
| SOX14    | SRY-box 14                                                                   |
| NRP2     | neuropilin 2                                                                 |
| NRP1     | neuropilin 1                                                                 |
| LDB1     | LIM domain binding 1                                                         |
| EIF2B3   | eukaryotic translation initiation factor 2B subunit gamma                    |

|         |                                                             |
|---------|-------------------------------------------------------------|
| EIF2B2  | eukaryotic translation initiation factor 2B subunit beta    |
| PHOX2B  | paired like homeobox 2b                                     |
| KALRN   | kalirin, RhoGEF kinase                                      |
| BRSK2   | BR serine/threonine kinase 2                                |
| ARTN    | artemin                                                     |
| LGI1    | leucine-rich, glioma inactivated 1                          |
| NOG     | noggin                                                      |
| NUMBL   | NUMB like, endocytic adaptor protein                        |
| NRXN3   | neurexin 3                                                  |
| NRXN1   | neurexin 1                                                  |
| PICK1   | protein interacting with PRKCA 1                            |
| PITPNM1 | phosphatidylinositol transfer protein membrane associated 1 |
| CELSR1  | cadherin EGF LAG seven-pass G-type receptor 1               |
| FEZ1    | fasciculation and elongation protein zeta 1                 |
| ECE2    | endothelin converting enzyme 2                              |
| HDAC4   | histone deacetylase 4                                       |
| ARNT2   | aryl hydrocarbon receptor nuclear translocator 2            |
| FGF19   | fibroblast growth factor 19                                 |
| SPON2   | spondin 2                                                   |
| OLFM1   | olfactomedin 1                                              |
| BAIAP2  | BAI1 associated protein 2                                   |
| NCKAP1  | NCK associated protein 1                                    |
| PPP1R17 | protein phosphatase 1 regulatory subunit 17                 |
| CYP46A1 | cytochrome P450 family 46 subfamily A member 1              |
| CIT     | citron rho-interacting serine/threonine kinase              |
| GPR45   | G protein-coupled receptor 45                               |
| POU6F2  | POU class 6 homeobox 2                                      |
| NLGN1   | neuroligin 1                                                |
| MYO16   | myosin XVI                                                  |
| ATXN10  | ataxin 10                                                   |
| LHX6    | LIM homeobox 6                                              |
| RND1    | Rho family GTPase 1                                         |
| MYLIP   | myosin regulatory light chain interacting protein           |
| TMOD2   | tropomodulin 2                                              |
| SOX8    | SRY-box 8                                                   |
| STMN3   | stathmin 3                                                  |
| TRAPPC4 | trafficking protein particle complex 4                      |
| HDAC7   | histone deacetylase 7                                       |
| ADAM22  | ADAM metallopeptidase domain 22                             |
| SNTG2   | syntrophin gamma 2                                          |
| PCDH18  | protocadherin 18                                            |
| MAML3   | mastermind like transcriptional coactivator 3               |
| PDGFC   | platelet derived growth factor C                            |
| PCDHB13 | protocadherin beta 13                                       |
| PCDHB3  | protocadherin beta 3                                        |
| PCDHB2  | protocadherin beta 2                                        |
| PCDHA1  | protocadherin alpha 1                                       |
| PARD3   | par-3 family cell polarity regulator                        |
| VANGL2  | VANGL planar cell polarity protein 2                        |
| DSCAML1 | DS cell adhesion molecule like 1                            |
| ALS2    | ALS2, alsin Rho guanine nucleotide exchange factor          |
| LRRC4C  | leucine rich repeat containing 4C                           |
| PCDHB16 | protocadherin beta 16                                       |
| MARK4   | microtubule affinity regulating kinase 4                    |
| PBX4    | PBX homeobox 4                                              |
| FOXP2   | forkhead box P2                                             |
| DMBX1   | diencephalon/mesencephalon homeobox 1                       |
| RBM45   | RNA binding motif protein 45                                |

|         |                                                             |
|---------|-------------------------------------------------------------|
| RTN4RL1 | reticulon 4 receptor like 1                                 |
| CNTN4   | contactin 4                                                 |
| MDGA2   | MAM domain containing glycosylphosphatidylinositol anchor 2 |
| ZNF384  | zinc finger protein 384                                     |
| PCSK9   | proprotein convertase subtilisin/kexin type 9               |
| MDGA1   | MAM domain containing glycosylphosphatidylinositol anchor 1 |
| RTN4RL2 | reticulon 4 receptor-like 2                                 |
| AGRN    | agrin                                                       |

**Table S4 – Gene collection of Remittent group**

| <b>Table S4 - Gene collection of Remittent group</b> |                                                                           |
|------------------------------------------------------|---------------------------------------------------------------------------|
| <b>Biological processes</b>                          |                                                                           |
| <b>System development</b>                            |                                                                           |
| <b>Gene Symbol</b>                                   | <b>Name Gene</b>                                                          |
| ACTA1                                                | actin, alpha 1, skeletal muscle                                           |
| ACVR1                                                | activin A receptor type 1                                                 |
| ACVR2A                                               | activin A receptor type 2A                                                |
| ACVRL1                                               | activin A receptor like type 1                                            |
| AES                                                  | amino-terminal enhancer of split                                          |
| ALK                                                  | anaplastic lymphoma receptor tyrosine kinase                              |
| ALOX12B                                              | arachidonate 12-lipoxygenase, 12R type                                    |
| ANG                                                  | angiogenin                                                                |
| APBA1                                                | amyloid beta precursor protein binding family A member 1                  |
| APBA2                                                | amyloid beta precursor protein binding family A member 2                  |
| APLP1                                                | amyloid beta precursor like protein 1                                     |
| RHOB                                                 | ras homolog family member B                                               |
| ATP2A2                                               | ATPase sarcoplasmic/endoplasmic reticulum Ca <sup>2+</sup> transporting 2 |
| ATP2B2                                               | ATPase plasma membrane Ca <sup>2+</sup> transporting 2                    |
| ATP6V1B1                                             | ATPase H <sup>+</sup> transporting V1 subunit B1                          |
| BDNF                                                 | brain-derived neurotrophic factor                                         |
| BMPR1B                                               | bone morphogenetic protein receptor type 1B                               |
| FOXL2                                                | forkhead box L2                                                           |
| BRAF                                                 | B-Raf proto-oncogene, serine/threonine kinase                             |
| BTG1                                                 | B-cell translocation gene 1, anti-proliferative                           |
| MPPED2                                               | metallophosphoesterase domain containing 2                                |
| CACNB2                                               | calcium voltage-gated channel auxiliary subunit beta 2                    |
| CASQ2                                                | calsequestrin 2                                                           |
| CASR                                                 | calcium sensing receptor                                                  |
| RUNX2                                                | runt related transcription factor 2                                       |
| RUNX1                                                | runt related transcription factor 1                                       |
| CD3D                                                 | CD3d molecule                                                             |
| CDH13                                                | cadherin 13                                                               |
| CENPF                                                | centromere protein F                                                      |
| CHRM1                                                | cholinergic receptor muscarinic 1                                         |
| CHRM3                                                | cholinergic receptor muscarinic 3                                         |
| CHRNA1                                               | cholinergic receptor nicotinic alpha 1 subunit                            |
| CHRNA4                                               | cholinergic receptor nicotinic alpha 4 subunit                            |
| CLN5                                                 | ceroid-lipofuscinosis, neuronal 5                                         |
| CMKLR1                                               | chemerin chemokine-like receptor 1                                        |
| COL1A1                                               | collagen type I alpha 1                                                   |
| COL1A2                                               | collagen type I alpha 2                                                   |
| COL4A2                                               | collagen type IV alpha 2                                                  |
| COL4A3                                               | collagen type IV alpha 3                                                  |
| COL5A2                                               | collagen type V alpha 2                                                   |
| COL6A3                                               | collagen type VI alpha 3                                                  |
| COL7A1                                               | collagen type VII alpha 1                                                 |
| COL9A1                                               | collagen type IX alpha 1                                                  |
| COL9A2                                               | collagen type IX alpha 2                                                  |
| COL11A1                                              | collagen type XI alpha 1                                                  |
| COL13A1                                              | collagen type XIII alpha 1                                                |
| CRMP1                                                | collapsin response mediator protein 1                                     |
| CRX                                                  | cone-rod homeobox                                                         |
| CTF1                                                 | cardiotrophin 1                                                           |
| CTGF                                                 | connective tissue growth factor                                           |
| DHCR24                                               | 24-dehydrocholesterol reductase                                           |



|         |                                                |
|---------|------------------------------------------------|
| DLG4    | discs large homolog 4                          |
| DLX2    | distal-less homeobox 2                         |
| DLX5    | distal-less homeobox 5                         |
| DPYSL3  | dihydropyrimidinase like 3                     |
| DRD2    | dopamine receptor D2                           |
| DSCAM   | DS cell adhesion molecule                      |
| DSP     | desmoplakin                                    |
| DTX1    | deltex 1                                       |
| DVL2    | dishevelled segment polarity protein 2         |
| DVL3    | dishevelled segment polarity protein 3         |
| EFNA5   | ephrin A5                                      |
| EGR2    | early growth response 2                        |
| EGR3    | early growth response 3                        |
| ELN     | elastin                                        |
| EN1     | engrailed homeobox 1                           |
| EPHB1   | EPH receptor B1                                |
| EPHB2   | EPH receptor B2                                |
| EPHB4   | EPH receptor B4                                |
| STX2    | syntaxin 2                                     |
| CLN8    | ceroid-lipofuscinosis, neuronal 8              |
| ERCC2   | excision repair cross-complementation group 2  |
| ETS1    | ETS proto-oncogene 1, transcription factor     |
| EVC     | EvC ciliary complex subunit 1                  |
| EVPL    | envoplakin                                     |
| EXT1    | exostosin glycosyltransferase 1                |
| EXT2    | exostosin glycosyltransferase 2                |
| EXTL1   | exostosin-like glycosyltransferase 1           |
| FBN1    | fibrillin 1                                    |
| FGF5    | fibroblast growth factor 5                     |
| FGF12   | fibroblast growth factor 12                    |
| FGFR1   | fibroblast growth factor receptor 1            |
| FGFR3   | fibroblast growth factor receptor 3            |
| FHL3    | four and a half LIM domains 3                  |
| FOXG1   | forkhead box G1                                |
| FOXC1   | forkhead box C1                                |
| FOXO3   | forkhead box O3                                |
| FLI1    | Fli-1 proto-oncogene, ETS transcription factor |
| FSHR    | follicle stimulating hormone receptor          |
| GAA     | glucosidase alpha, acid                        |
| GATA4   | GATA binding protein 4                         |
| GDNF    | glial cell derived neurotrophic factor         |
| GHSR    | growth hormone secretagogue receptor           |
| GLI2    | GLI family zinc finger 2                       |
| GSTM3   | glutathione S-transferase mu 3 (brain)         |
| GYPC    | glycophorin C (Gerbich blood group)            |
| HOXA13  | homeobox A13                                   |
| HOXD13  | homeobox D13                                   |
| HES1    | hes family bHLH transcription factor 1         |
| HSD17B3 | hydroxysteroid (17-beta) dehydrogenase 3       |
| IFI16   | interferon gamma inducible protein 16          |
| IFRD1   | interferon related developmental regulator 1   |
| IGFBP3  | insulin like growth factor binding protein 3   |
| IL10    | interleukin 10                                 |
| IL18    | interleukin 18                                 |
| INHBA   | inhibin beta A                                 |
| PDX1    | pancreatic and duodenal homeobox 1             |
| ITGA2   | integrin subunit alpha 2                       |
| JAG2    | jagged 2                                       |

|          |                                                                   |
|----------|-------------------------------------------------------------------|
| JAK2     | Janus kinase 2                                                    |
| JARID2   | jumonji and AT-rich interaction domain containing 2               |
| KCNQ2    | potassium voltage-gated channel subfamily Q member 2              |
| KRT6A    | keratin 6A                                                        |
| KRT34    | keratin 34                                                        |
| KRT85    | keratin 85                                                        |
| LAMA2    | laminin subunit alpha 2                                           |
| LAMC1    | laminin subunit gamma 1                                           |
| LHX1     | LIM homeobox 1                                                    |
| LIG1     | DNA ligase 1                                                      |
| ABLIM1   | actin binding LIM protein 1                                       |
| LSAMP    | limbic system-associated membrane protein                         |
| LY6H     | lymphocyte antigen 6 complex, locus H                             |
| LYN      | LYN proto-oncogene, Src family tyrosine kinase                    |
| MAL      | mal, T-cell differentiation protein                               |
| MAPT     | microtubule associated protein tau                                |
| MBP      | myelin basic protein                                              |
| MEA1     | male-enhanced antigen 1                                           |
| MEF2A    | myocyte enhancer factor 2A                                        |
| MEF2C    | myocyte enhancer factor 2C                                        |
| MEF2D    | myocyte enhancer factor 2D                                        |
| MEST     | mesoderm specific transcript                                      |
| MOBP     | myelin-associated oligodendrocyte basic protein                   |
| MOG      | myelin oligodendrocyte glycoprotein                               |
| MSI1     | musashi RNA binding protein 1                                     |
| MSX1     | msh homeobox 1                                                    |
| MSX2     | msh homeobox 2                                                    |
| MYBPC3   | myosin binding protein C, cardiac                                 |
| MYH7     | myosin, heavy chain 7, cardiac muscle, beta                       |
| MYH11    | myosin, heavy chain 11, smooth muscle                             |
| MYL6     | myosin light chain 6                                              |
| NAB2     | NGFI-A binding protein 2                                          |
| NAIP     | NLR family, apoptosis inhibitory protein                          |
| NCL      | nucleolin                                                         |
| NELL1    | neural EGFL like 1                                                |
| NEUROG1  | neurogenin 1                                                      |
| NHLH1    | nescient helix-loop-helix 1                                       |
| NINJ1    | ninjurin 1                                                        |
| NKX2-2   | NK2 homeobox 2                                                    |
| NKX6-1   | NK6 homeobox 1                                                    |
| NOTCH1   | notch 1                                                           |
| NOTCH2   | notch 2                                                           |
| NOTCH4   | notch 4                                                           |
| NPAS2    | neuronal PAS domain protein 2                                     |
| NPPB     | natriuretic peptide B                                             |
| NPR1     | natriuretic peptide receptor 1                                    |
| NPR3     | natriuretic peptide receptor 3                                    |
| NPTX1    | neuronal pentraxin 1                                              |
| NRCAM    | neuronal cell adhesion molecule                                   |
| NRTN     | neurturin                                                         |
| OTX2     | orthodenticle homeobox 2                                          |
| PAFAH1B3 | platelet activating factor acetylhydrolase 1b catalytic subunit 3 |
| PRDX1    | peroxiredoxin 1                                                   |
| PARK2    | parkin RBR E3 ubiquitin protein ligase                            |
| PAX1     | paired box 1                                                      |
| PAX2     | paired box 2                                                      |
| PAX3     | paired box 3                                                      |
| PAX6     | paired box 6                                                      |

|          |                                                                 |
|----------|-----------------------------------------------------------------|
| PBX1     | PBX homeobox 1                                                  |
| PCDH1    | protocadherin 1                                                 |
| PCP4     | Purkinje cell protein 4                                         |
| SERPINF1 | serpin family F member 1                                        |
| PF4      | platelet factor 4                                               |
| PITX2    | paired like homeodomain 2                                       |
| PKD2     | polycystin 2, transient receptor potential cation channel       |
| PLG      | plasminogen                                                     |
| PML      | promyelocytic leukemia                                          |
| POU3F3   | POU class 3 homeobox 3                                          |
| POU6F1   | POU class 6 homeobox 1                                          |
| PPARD    | peroxisome proliferator activated receptor delta                |
| KLK7     | kallikrein related peptidase 7                                  |
| PTCH1    | patched 1                                                       |
| PTH      | parathyroid hormone                                             |
| PTH1R    | parathyroid hormone 1 receptor                                  |
| PTN      | pleiotrophin                                                    |
| PTS      | 6-pyruvoyltetrahydropterin synthase                             |
| RET      | ret proto-oncogene                                              |
| RNH1     | ribonuclease/angiogenin inhibitor 1                             |
| ROBO1    | roundabout guidance receptor 1                                  |
| ROBO2    | roundabout guidance receptor 2                                  |
| RORB     | RAR related orphan receptor B                                   |
| RTN1     | reticulon 1                                                     |
| SCN8A    | sodium voltage-gated channel alpha subunit 8                    |
| CCL2     | C-C motif chemokine ligand 2                                    |
| SECTM1   | secreted and transmembrane 1                                    |
| SFTPD    | surfactant protein D                                            |
| SGCA     | sarcoglycan alpha                                               |
| SGCD     | sarcoglycan delta                                               |
| SHH      | sonic hedgehog                                                  |
| SHOX2    | short stature homeobox 2                                        |
| SIM1     | single-minded family bHLH transcription factor 1                |
| SIM2     | single-minded family bHLH transcription factor 2                |
| SIX1     | SIX homeobox 1                                                  |
| SMTN     | smoothelin                                                      |
| SLIT3    | slit guidance ligand 3                                          |
| SNAI2    | snail family transcriptional repressor 2                        |
| SNCA     | synuclein alpha                                                 |
| SOD1     | superoxide dismutase 1, soluble                                 |
| SOX11    | SRY-box 11                                                      |
| SPARC    | secreted protein acidic and cysteine rich                       |
| SPG7     | SPG7, paraplegin matrix AAA peptidase subunit                   |
| SRD5A2   | steroid 5 alpha-reductase 2                                     |
| STAT3    | signal transducer and activator of transcription 3              |
| STATH    | statherin                                                       |
| SVIL     | supervillin                                                     |
| TBX1     | T-box 1                                                         |
| TBX5     | T-box 5                                                         |
| TBX3     | T-box 3                                                         |
| TCF12    | transcription factor 12                                         |
| TEAD4    | TEA domain transcription factor 4                               |
| TFAP2A   | transcription factor AP-2 alpha                                 |
| TGM3     | transglutaminase 3                                              |
| KLF10    | Kruppel-like factor 10                                          |
| TIE1     | tyrosine kinase with immunoglobulin like and EGF like domains 1 |
| TLE1     | transducin like enhancer of split 1                             |
| TLE3     | transducin like enhancer of split 3                             |

|         |                                                                              |
|---------|------------------------------------------------------------------------------|
| TLL1    | tolloid like 1                                                               |
| NR2E1   | nuclear receptor subfamily 2 group E member 1                                |
| TNNI3   | troponin I3, cardiac type                                                    |
| TPD52   | tumor protein D52                                                            |
| NR2C2   | nuclear receptor subfamily 2 group C member 2                                |
| TRPS1   | transcriptional repressor GATA binding 1                                     |
| TWIST1  | twist family bHLH transcription factor 1                                     |
| UBB     | ubiquitin B                                                                  |
| UBE3A   | ubiquitin protein ligase E3A                                                 |
| UGT8    | UDP glycosyltransferase 8                                                    |
| UTRN    | utrophin                                                                     |
| WFS1    | wolframin ER transmembrane glycoprotein                                      |
| YWHAG   | tyrosine 3-monooxygenase/tryptophan 5-monooxygenase activation protein gamma |
| YWHAH   | tyrosine 3-monooxygenase/tryptophan 5-monooxygenase activation protein eta   |
| ZAP70   | zeta chain of T cell receptor associated protein kinase 70kDa                |
| ZIC1    | Zic family member 1                                                          |
| ZIC2    | Zic family member 2                                                          |
| ZBTB16  | zinc finger and BTB domain containing 16                                     |
| SCG2    | secretogranin II                                                             |
| SEMA3B  | semaphorin 3B                                                                |
| ADAM12  | ADAM metallopeptidase domain 12                                              |
| ALX1    | ALX homeobox 1                                                               |
| ST8SIA2 | ST8 alpha-N-acetyl-neuraminide alpha-2,8-sialyltransferase 2                 |
| FZD9    | frizzled class receptor 9                                                    |
| SOX14   | SRY-box 14                                                                   |
| FOXP1   | forkhead box N1                                                              |
| ENC1    | ectodermal-neural cortex 1                                                   |
| LMO4    | LIM domain only 4                                                            |
| UNC5C   | unc-5 netrin receptor C                                                      |
| JRKL    | JRK-like                                                                     |
| SCEL    | sciellin                                                                     |
| NRP2    | neuropilin 2                                                                 |
| NRP1    | neuropilin 1                                                                 |
| LDB1    | LIM domain binding 1                                                         |
| SPHK1   | sphingosine kinase 1                                                         |
| EIF2B3  | eukaryotic translation initiation factor 2B subunit gamma                    |
| SGCE    | sarcoglycan epsilon                                                          |
| CACNA1H | calcium voltage-gated channel subunit alpha1 H                               |
| KALRN   | kalirin, RhoGEF kinase                                                       |
| BRSK2   | BR serine/threonine kinase 2                                                 |
| SEMA5A  | semaphorin 5A                                                                |
| ARTN    | artemin                                                                      |
| SART1   | squamous cell carcinoma antigen recognized by T-cells 1                      |
| DCLK1   | doublecortin like kinase 1                                                   |
| LGI1    | leucine-rich, glioma inactivated 1                                           |
| NOG     | noggin                                                                       |
| NUMBL   | NUMB like, endocytic adaptor protein                                         |
| KLF4    | Kruppel-like factor 4 (gut)                                                  |
| KL      | klotho                                                                       |
| NRXN3   | neurexin 3                                                                   |
| NRXN1   | neurexin 1                                                                   |
| EIF2AK3 | eukaryotic translation initiation factor 2 alpha kinase 3                    |
| TBX4    | T-box 4                                                                      |
| PITPNM1 | phosphatidylinositol transfer protein membrane associated 1                  |
| CARTPT  | CART prepropeptide                                                           |
| CELSR1  | cadherin EGF LAG seven-pass G-type receptor 1                                |

|         |                                                            |
|---------|------------------------------------------------------------|
| FEZ2    | fasciculation and elongation protein zeta 2                |
| SOCS5   | suppressor of cytokine signaling 5                         |
| ECE2    | endothelin converting enzyme 2                             |
| HDAC9   | histone deacetylase 9                                      |
| HDAC4   | histone deacetylase 4                                      |
| FARP2   | FERM, ARH/RhoGEF and pleckstrin domain protein 2           |
| HDAC5   | histone deacetylase 5                                      |
| CLEC3A  | C-type lectin domain family 3 member A                     |
| GDF11   | growth differentiation factor 11                           |
| SPRY2   | sprouty RTK signaling antagonist 2                         |
| SPEG    | SPEG complex locus                                         |
| IKZF1   | IKAROS family zinc finger 1                                |
| SPON2   | spondin 2                                                  |
| OLFM1   | olfactomedin 1                                             |
| BAIAP2  | BAI1 associated protein 2                                  |
| FST     | follistatin                                                |
| SEMA4F  | ssemaphorin 4F                                             |
| DPYSL4  | dihydropyrimidinase like 4                                 |
| PDPN    | podoplanin                                                 |
| POSTN   | periostin                                                  |
| DMRT2   | doublesex and mab-3 related transcription factor 2         |
| DLL3    | delta like canonical Notch ligand 3                        |
| NCKAP1  | NCK associated protein 1                                   |
| CYP46A1 | cytochrome P450 family 46 subfamily A member 1             |
| CIT     | citron rho-interacting serine/threonine kinase             |
| GPR45   | G protein-coupled receptor 45                              |
| IKZF3   | IKAROS family zinc finger 3                                |
| MRAS    | muscle RAS oncogene homolog                                |
| NTNG1   | netrin G1                                                  |
| NLGN1   | neuroligin 1                                               |
| ACIN1   | apoptotic chromatin condensation inducer 1                 |
| MYO16   | myosin XVI                                                 |
| CYFIP1  | cytoplasmic FMR1 interacting protein 1                     |
| CBY1    | chibby homolog 1 (Drosophila)                              |
| VAX2    | ventral anterior homeobox 2                                |
| ATXN10  | ataxin 10                                                  |
| KLK5    | kallikrein related peptidase 5                             |
| POU2F3  | POU class 2 homeobox 3                                     |
| WHRN    | whirlin                                                    |
| PCDHB5  | protocadherin beta 5                                       |
| LHX6    | LIM homeobox 6                                             |
| NPTN    | neuroplastin                                               |
| TINAG   | tubulointerstitial nephritis antigen                       |
| RND1    | Rho family GTPase 1                                        |
| MYLIP   | myosin regulatory light chain interacting protein          |
| SOX8    | SRY-box 8                                                  |
| COL5A3  | collagen type V alpha 3                                    |
| NEUROG3 | neurogenin 3                                               |
| MYEF2   | myelin expression factor 2                                 |
| IRX4    | iroquois homeobox 4                                        |
| STMN3   | stathmin 3                                                 |
| ZBTB7B  | zinc finger and BTB domain containing 7B                   |
| EGFL7   | EGF like domain multiple 7                                 |
| CRIM1   | cysteine rich transmembrane BMP regulator 1 (chordin-like) |
| CALML5  | calmodulin like 5                                          |
| SNTG2   | syntrophin gamma 2                                         |
| PCDH18  | protocadherin 18                                           |
| ROBO4   | roundabout guidance receptor 4                             |

|                                   |                                                                                    |
|-----------------------------------|------------------------------------------------------------------------------------|
| SNRK                              | SNF related kinase                                                                 |
| AGGF1                             | angiogenic factor with G-patch and FHA domains 1                                   |
| MAP1S                             | microtubule associated protein 1S                                                  |
| MAML3                             | mastermind like transcriptional coactivator 3                                      |
| ADAP2                             | ArfGAP with dual PH domains 2                                                      |
| PCDHB15                           | protocadherin beta 15                                                              |
| PCDHB13                           | protocadherin beta 13                                                              |
| PCDHB2                            | protocadherin beta 2                                                               |
| PCDHA1                            | protocadherin alpha 1                                                              |
| ANKH                              | ANKH inorganic pyrophosphate transport regulator                                   |
| KIAA1217                          | KIAA1217                                                                           |
| PARD3                             | par-3 family cell polarity regulator                                               |
| ANKRD7                            | ankyrin repeat domain 7                                                            |
| C1GALT1                           | core 1 synthase, glycoprotein-N-acetylgalactosamine 3-beta-galactosyltransferase 1 |
| NMUR2                             | neuromedin U receptor 2                                                            |
| MEPE                              | matrix extracellular phosphoglycoprotein                                           |
| UTP3                              | UTP3, small subunit processome component homolog (S. cerevisiae)                   |
| RTN4                              | reticulon 4                                                                        |
| SMURF1                            | SMAD specific E3 ubiquitin protein ligase 1                                        |
| DSCAML1                           | DS cell adhesion molecule like 1                                                   |
| MKL2                              | MKL1/myocardin like 2                                                              |
| LRRC4C                            | leucine rich repeat containing 4C                                                  |
| PROK2                             | prokineticin 2                                                                     |
| COL18A1                           | collagen type XVIII alpha 1                                                        |
| CCM2                              | CCM2 scaffolding protein                                                           |
| KIRREL3                           | kin of IRRE like 3 (Drosophila)                                                    |
| NTNG2                             | netrin G2                                                                          |
| SCIN                              | scinderin                                                                          |
| TRIM15                            | tripartite motif containing 15                                                     |
| ATPIF1                            | ATPase inhibitory factor 1                                                         |
| FOXP2                             | forkhead box P2                                                                    |
| APOA5                             | apolipoprotein A5                                                                  |
| TWIST2                            | twist family bHLH transcription factor 2                                           |
| GYLTL1B                           | glycosyltransferase-like 1B                                                        |
| DMBX1                             | diencephalon/mesencephalon homeobox 1                                              |
| NRSN1                             | neurexin 1                                                                         |
| RTN4RL1                           | reticulon 4 receptor like 1                                                        |
| NFAM1                             | NFAT activating protein with ITAM motif 1                                          |
| CNTN4                             | contactin 4                                                                        |
| ZNF384                            | zinc finger protein 384                                                            |
| EPGN                              | epithelial mitogen                                                                 |
| PCSK9                             | proprotein convertase subtilisin/kexin type 9                                      |
| PTF1A                             | pancreas specific transcription factor, 1a                                         |
| MDGA1                             | MAM domain containing glycosylphosphatidylinositol anchor 1                        |
| VWC2                              | von Willebrand factor C domain containing 2                                        |
| AGRN                              | agrin                                                                              |
| <b>Nervous system development</b> |                                                                                    |
| <b>Gene Symbol</b>                | <b>Name Gene</b>                                                                   |
| ALK                               | anaplastic lymphoma receptor tyrosine kinase                                       |
| APBA1                             | amyloid beta precursor protein binding family A member 1                           |
| APBA2                             | amyloid beta precursor protein binding family A member 2                           |
| APLP1                             | amyloid beta precursor like protein 1                                              |
| ATP2B2                            | ATPase plasma membrane Ca <sup>2+</sup> transporting 2                             |
| BDNF                              | brain-derived neurotrophic factor                                                  |
| CHRM3                             | cholinergic receptor muscarinic 3                                                  |
| CHRNA4                            | cholinergic receptor nicotinic alpha 4 subunit                                     |
| CLN5                              | ceroid-lipofuscinosis, neuronal 5                                                  |

|          |                                                                   |
|----------|-------------------------------------------------------------------|
| CRMP1    | collapsin response mediator protein 1                             |
| CTF1     | cardiotrophin 1                                                   |
| DLG4     | discs large homolog 4                                             |
| DLX2     | distal-less homeobox 2                                            |
| DLX5     | distal-less homeobox 5                                            |
| DRD2     | dopamine receptor D2                                              |
| DSCAM    | DS cell adhesion molecule                                         |
| DTX1     | deltex 1                                                          |
| DVL3     | dishevelled segment polarity protein 3                            |
| EFNA5    | ephrin A5                                                         |
| EPHB1    | EPH receptor B1                                                   |
| EPHB2    | EPH receptor B2                                                   |
| FGF12    | fibroblast growth factor 12                                       |
| FOXP1    | forkhead box G1                                                   |
| GDNF     | glial cell derived neurotrophic factor                            |
| GLI2     | GLI family zinc finger 2                                          |
| HES1     | hes family bHLH transcription factor 1                            |
| JARID2   | jumonji and AT-rich interaction domain containing 2               |
| KCNQ2    | potassium voltage-gated channel subfamily Q member 2              |
| LHX1     | LIM homeobox 1                                                    |
| LY6H     | lymphocyte antigen 6 complex, locus H                             |
| MAL      | mal, T-cell differentiation protein                               |
| MAPT     | microtubule associated protein tau                                |
| MBP      | myelin basic protein                                              |
| MEF2C    | myocyte enhancer factor 2C                                        |
| MOBP     | myelin-associated oligodendrocyte basic protein                   |
| MOG      | myelin oligodendrocyte glycoprotein                               |
| MSI1     | musashi RNA binding protein 1                                     |
| NAB2     | NGFI-A binding protein 2                                          |
| NAIP     | NLR family, apoptosis inhibitory protein                          |
| NELL1    | neural EGFL like 1                                                |
| NEUROG1  | neurogenin 1                                                      |
| NHLH1    | nescient helix-loop-helix 1                                       |
| NINJ1    | ninjurin 1                                                        |
| NPAS2    | neuronal PAS domain protein 2                                     |
| NPTX1    | neuronal pentraxin 1                                              |
| NRCAM    | neuronal cell adhesion molecule                                   |
| NRTN     | neurturin                                                         |
| PAFAH1B3 | platelet activating factor acetylhydrolase 1b catalytic subunit 3 |
| PARK2    | parkin RBR E3 ubiquitin protein ligase                            |
| PAX2     | paired box 2                                                      |
| PAX6     | paired box 6                                                      |
| PBX1     | PBX homeobox 1                                                    |
| PCDH1    | protocadherin 1                                                   |
| SERPINF1 | serpin family F member 1                                          |
| POU3F3   | POU class 3 homeobox 3                                            |
| POU6F1   | POU class 6 homeobox 1                                            |
| PPARD    | peroxisome proliferator activated receptor delta                  |
| PTN      | pleiotrophin                                                      |
| PTS      | 6-pyruvoyltetrahydropterin synthase                               |
| ROBO1    | roundabout guidance receptor 1                                    |
| ROBO2    | roundabout guidance receptor 2                                    |
| RTN1     | reticulon 1                                                       |
| SCN8A    | sodium voltage-gated channel alpha subunit 8                      |
| SHH      | sonic hedgehog                                                    |
| SIM1     | single-minded family bHLH transcription factor 1                  |
| SIM2     | single-minded family bHLH transcription factor 2                  |
| SLIT3    | slit guidance ligand 3                                            |

|         |                                                                              |
|---------|------------------------------------------------------------------------------|
| SNCA    | synuclein alpha                                                              |
| SOD1    | superoxide dismutase 1, soluble                                              |
| SOX11   | SRY-box 11                                                                   |
| SPG7    | SPG7, paraplegin matrix AAA peptidase subunit                                |
| STAT3   | signal transducer and activator of transcription 3                           |
| NR2E1   | nuclear receptor subfamily 2 group E member 1                                |
| UBB     | ubiquitin B                                                                  |
| UBE3A   | ubiquitin protein ligase E3A                                                 |
| UGT8    | UDP glycosyltransferase 8                                                    |
| WFS1    | wolframin ER transmembrane glycoprotein                                      |
| YWHAG   | tyrosine 3-monooxygenase/tryptophan 5-monooxygenase activation protein gamma |
| ZIC2    | Zic family member 2                                                          |
| ZBTB16  | zinc finger and BTB domain containing 16                                     |
| SEMA3B  | semaphorin 3B                                                                |
| ALX1    | ALX homeobox 1                                                               |
| ST8SIA2 | ST8 alpha-N-acetyl-neuraminide alpha-2,8-sialyltransferase 2                 |
| SOX14   | SRY-box 14                                                                   |
| ENC1    | ectodermal-neural cortex 1                                                   |
| UNC5C   | unc-5 netrin receptor C                                                      |
| NRP2    | neuropilin 2                                                                 |
| NRP1    | neuropilin 1                                                                 |
| LDB1    | LIM domain binding 1                                                         |
| EIF2B3  | eukaryotic translation initiation factor 2B subunit gamma                    |
| KALRN   | kalirin, RhoGEF kinase                                                       |
| BRSK2   | BR serine/threonine kinase 2                                                 |
| ARTN    | artemin                                                                      |
| LG1     | leucine-rich, glioma inactivated 1                                           |
| NOG     | noggin                                                                       |
| NUMBL   | NUMB like, endocytic adaptor protein                                         |
| NRXN3   | neurexin 3                                                                   |
| NRXN1   | neurexin 1                                                                   |
| PITPNM1 | phosphatidylinositol transfer protein membrane associated 1                  |
| CELSR1  | cadherin EGF LAG seven-pass G-type receptor 1                                |
| FEZ2    | fasciculation and elongation protein zeta 2                                  |
| HDAC4   | histone deacetylase 4                                                        |
| FARP2   | FERM, ARH/RhoGEF and pleckstrin domain protein 2                             |
| SPON2   | spondin 2                                                                    |
| OLFM1   | olfactomedin 1                                                               |
| BAIAP2  | BAI1 associated protein 2                                                    |
| SEMA4F  | semaphorin 4F                                                                |
| CYP46A1 | cytochrome P450 family 46 subfamily A member 1                               |
| CIT     | citron rho-interacting serine/threonine kinase                               |
| GPR45   | G protein-coupled receptor 45                                                |
| NTNG1   | netrin G1                                                                    |
| NLGN1   | neuroligin 1                                                                 |
| MYO16   | myosin XVI                                                                   |
| CYFIP1  | cytoplasmic FMR1 interacting protein 1                                       |
| ATXN10  | ataxin 10                                                                    |
| PCDHB5  | protocadherin beta 5                                                         |
| LHX6    | LIM homeobox 6                                                               |
| NPTN    | neuroplastin                                                                 |
| RND1    | Rho family GTPase 1                                                          |
| MYLIP   | myosin regulatory light chain interacting protein                            |
| SOX8    | SRY-box 8                                                                    |
| STMN3   | stathmin 3                                                                   |
| CRIM1   | cysteine rich transmembrane BMP regulator 1 (chordin-like)                   |
| SNTG2   | syntrophin gamma 2                                                           |



|                            |                                                             |
|----------------------------|-------------------------------------------------------------|
| PCDH18                     | protocadherin 18                                            |
| MAP1S                      | microtubule associated protein 1S                           |
| PCDHB13                    | protocadherin beta 13                                       |
| PCDHA1                     | protocadherin alpha 1                                       |
| PARD3                      | par-3 family cell polarity regulator                        |
| NMUR2                      | neuromedin U receptor 2                                     |
| RTN4                       | reticulon 4                                                 |
| DSCAML1                    | DS cell adhesion molecule like 1                            |
| LRRC4C                     | leucine rich repeat containing 4C                           |
| NTNG2                      | netrin G2                                                   |
| FOXP2                      | forkhead box P2                                             |
| DMBX1                      | diencephalon/mesencephalon homeobox 1                       |
| NRSN1                      | neurensin 1                                                 |
| RTN4RL1                    | reticulon 4 receptor like 1                                 |
| CNTN4                      | contactin 4                                                 |
| ZNF384                     | zinc finger protein 384                                     |
| MDGA1                      | MAM domain containing glycosylphosphatidylinositol anchor 1 |
| AGRN                       | agrin                                                       |
| <b>Signal transduction</b> |                                                             |
| <b>Gene Symbol</b>         | <b>Name Gene</b>                                            |
| ABCA1                      | ATP binding cassette subfamily A member 1                   |
| ABR                        | active BCR-related                                          |
| ACTL6A                     | actin like 6A                                               |
| ACVR1                      | activin A receptor type 1                                   |
| ACVR2A                     | activin A receptor type 2A                                  |
| ACVRL1                     | activin A receptor like type 1                              |
| ADM                        | adrenomedullin                                              |
| ADRA1A                     | adrenoceptor alpha 1A                                       |
| ADRA2A                     | adrenoceptor alpha 2A                                       |
| ADRA2B                     | adrenoceptor alpha 2B                                       |
| ADRA2C                     | adrenoceptor alpha 2C                                       |
| ADRB3                      | adrenoceptor beta 3                                         |
| GRK3                       | G protein-coupled receptor kinase 3                         |
| ALCAM                      | activated leukocyte cell adhesion molecule                  |
| ANG                        | angiogenin                                                  |
| ANGPT1                     | angiopoietin 1                                              |
| BIRC2                      | baculoviral IAP repeat containing 2                         |
| FAS                        | Fas cell surface death receptor                             |
| FASLG                      | Fas ligand                                                  |
| RHOB                       | ras homolog family member B                                 |
| ARHGAP1                    | Rho GTPase activating protein 1                             |
| ARHGDIA                    | Rho GDP dissociation inhibitor alpha                        |
| ASGR2                      | asialoglycoprotein receptor 2                               |
| AVPR1A                     | arginine vasopressin receptor 1A                            |
| AXL                        | AXL receptor tyrosine kinase                                |
| BCL3                       | B-cell CLL/lymphoma 3                                       |
| BDKRB2                     | bradykinin receptor B2                                      |
| BIK                        | BCL2 interacting killer                                     |
| BMPR1A                     | bone morphogenetic protein receptor type 1A                 |
| BMPR2                      | bone morphogenetic protein receptor type 2                  |
| BNIP3                      | BCL2/adenovirus E1B 19kDa interacting protein 3             |
| FOXL2                      | forkhead box L2                                             |
| BRCA1                      | breast cancer 1                                             |
| BSG                        | basigin (Ok blood group)                                    |
| BST2                       | bone marrow stromal cell antigen 2                          |
| C3                         | complement component 3                                      |
| C3AR1                      | complement component 3a receptor 1                          |
| CAPN5                      | calpain 5                                                   |



|        |                                                        |
|--------|--------------------------------------------------------|
| DAPK3  | death-associated protein kinase 3                      |
| DAXX   | death-domain associated protein                        |
| DFFB   | DNA fragmentation factor subunit beta                  |
| DLG4   | discs large homolog 4                                  |
| DMPK   | dystrophia myotonica protein kinase                    |
| DOCK1  | dedicator of cytokinesis 1                             |
| DPYSL3 | dihydropyrimidinase like 3                             |
| DRD2   | dopamine receptor D2                                   |
| DRG2   | developmentally regulated GTP binding protein 2        |
| DTX1   | deltex 1                                               |
| DUSP4  | dual specificity phosphatase 4                         |
| ECT2   | epithelial cell transforming 2                         |
| S1PR3  | sphingosine-1-phosphate receptor 3                     |
| EDN1   | endothelin 1                                           |
| EDN2   | endothelin 2                                           |
| EDNRB  | endothelin receptor type B                             |
| EEF1D  | eukaryotic translation elongation factor 1 delta       |
| EGFR   | epidermal growth factor receptor                       |
| EPHA2  | EPH receptor A2                                        |
| ELK3   | ELK3, ETS transcription factor                         |
| MARK2  | microtubule affinity regulating kinase 2               |
| EPAS1  | endothelial PAS domain protein 1                       |
| EPHA3  | EPH receptor A3                                        |
| EPHB1  | EPH receptor B1                                        |
| EPHB3  | EPH receptor B3                                        |
| STX2   | syntaxin 2                                             |
| EPS8   | epidermal growth factor receptor pathway substrate 8   |
| EPS15  | epidermal growth factor receptor pathway substrate 15  |
| ERBB3  | erb-b2 receptor tyrosine kinase 3                      |
| ERBB4  | erb-b2 receptor tyrosine kinase 4                      |
| ERN1   | endoplasmic reticulum to nucleus signaling 1           |
| ESR1   | estrogen receptor 1                                    |
| EXT1   | exostosin glycosyltransferase 1                        |
| EXT2   | exostosin glycosyltransferase 2                        |
| F2     | coagulation factor II, thrombin                        |
| PTK2B  | protein tyrosine kinase 2 beta                         |
| FGF3   | fibroblast growth factor 3                             |
| FGF4   | fibroblast growth factor 4                             |
| FGF5   | fibroblast growth factor 5                             |
| FGF6   | fibroblast growth factor 6                             |
| FGF9   | fibroblast growth factor 9                             |
| FGF12  | fibroblast growth factor 12                            |
| FGF14  | fibroblast growth factor 14                            |
| FGFR1  | fibroblast growth factor receptor 1                    |
| FGFR3  | fibroblast growth factor receptor 3                    |
| FGFR4  | fibroblast growth factor receptor 4                    |
| FLNB   | filamin B                                              |
| FLT3   | fms related tyrosine kinase 3                          |
| FLT4   | fms related tyrosine kinase 4                          |
| FMOD   | fibromodulin                                           |
| FPR1   | formyl peptide receptor 1                              |
| FSHR   | follicle stimulating hormone receptor                  |
| FYB    | FYN binding protein                                    |
| FYN    | FYN proto-oncogene, Src family tyrosine kinase         |
| IFI6   | interferon alpha inducible protein 6                   |
| GAB1   | GRB2 associated binding protein 1                      |
| GABBR1 | gamma-aminobutyric acid type B receptor subunit 1      |
| GABRA1 | gamma-aminobutyric acid type A receptor alpha1 subunit |

|         |                                                        |
|---------|--------------------------------------------------------|
| GABRA4  | gamma-aminobutyric acid type A receptor alpha4 subunit |
| GABRB1  | gamma-aminobutyric acid type A receptor beta1 subunit  |
| GABRB2  | gamma-aminobutyric acid type A receptor beta2 subunit  |
| GABRB3  | gamma-aminobutyric acid type A receptor beta3 subunit  |
| GABRD   | gamma-aminobutyric acid type A receptor delta subunit  |
| GABRR2  | gamma-aminobutyric acid type A receptor rho2 subunit   |
| GALR1   | galanin receptor 1                                     |
| GAP43   | growth associated protein 43                           |
| GDF9    | growth differentiation factor 9                        |
| GDNF    | glial cell derived neurotrophic factor                 |
| GEM     | GTP binding protein overexpressed in skeletal muscle   |
| GFRA2   | GDNF family receptor alpha 2                           |
| GHRHR   | growth hormone releasing hormone receptor              |
| GHSR    | growth hormone secretagogue receptor                   |
| GIPR    | gastric inhibitory polypeptide receptor                |
| GJA1    | gap junction protein alpha 1                           |
| GLI2    | GLI family zinc finger 2                               |
| GLI3    | GLI family zinc finger 3                               |
| GLP1R   | glucagon like peptide 1 receptor                       |
| GLRA1   | glycine receptor alpha 1                               |
| GML     | glycosylphosphatidylinositol anchored molecule like    |
| GNA11   | G protein subunit alpha 11                             |
| GNA12   | G protein subunit alpha 12                             |
| GNAI2   | G protein subunit alpha i2                             |
| GNAL    | G protein subunit alpha L                              |
| GNAS    | GNAS complex locus                                     |
| GNB2    | G protein subunit beta 2                               |
| GNB3    | G protein subunit beta 3                               |
| GNG4    | G protein subunit gamma 4                              |
| GNG7    | G protein subunit gamma 7                              |
| GNL1    | G protein nucleolar 1 (putative)                       |
| GPR3    | G protein-coupled receptor 3                           |
| XCR1    | X-C motif chemokine receptor 1                         |
| GPR6    | G protein-coupled receptor 6                           |
| NPBWR1  | neuropeptides B/W receptor 1                           |
| NPBWR2  | neuropeptides B/W receptor 2                           |
| UTS2R   | urotensin 2 receptor                                   |
| GPR19   | G protein-coupled receptor 19                          |
| GPR20   | G protein-coupled receptor 20                          |
| GPR25   | G protein-coupled receptor 25                          |
| GPR27   | G protein-coupled receptor 27                          |
| GPR35   | G protein-coupled receptor 35                          |
| GPR39   | G protein-coupled receptor 39                          |
| FFAR1   | free fatty acid receptor 1                             |
| FFAR2   | free fatty acid receptor 2                             |
| GRK5    | G protein-coupled receptor kinase 5                    |
| GRK6    | G protein-coupled receptor kinase 6                    |
| MKNK2   | MAP kinase interacting serine/threonine kinase 2       |
| GPS1    | G protein pathway suppressor 1                         |
| GRB2    | growth factor receptor bound protein 2                 |
| GRB7    | growth factor receptor bound protein 7                 |
| GRB10   | growth factor receptor bound protein 10                |
| GRB14   | growth factor receptor bound protein 14                |
| RAPGEF1 | Rap guanine nucleotide exchange factor 1               |
| GRIA1   | glutamate ionotropic receptor AMPA type subunit 1      |
| GRIA2   | glutamate ionotropic receptor AMPA type subunit 2      |
| GRIA4   | glutamate ionotropic receptor AMPA type subunit 4      |
| GRID2   | glutamate ionotropic receptor delta type subunit 2     |

|         |                                                                |
|---------|----------------------------------------------------------------|
| GRIK2   | glutamate ionotropic receptor kainate type subunit 2           |
| GRIK4   | glutamate ionotropic receptor kainate type subunit 4           |
| GRIN2A  | glutamate ionotropic receptor NMDA type subunit 2A             |
| GRIN2B  | glutamate ionotropic receptor NMDA type subunit 2B             |
| GRIN2C  | glutamate ionotropic receptor NMDA type subunit 2C             |
| NR3C1   | nuclear receptor subfamily 3 group C member 1                  |
| GRM2    | glutamate metabotropic receptor 2                              |
| GRM3    | glutamate metabotropic receptor 3                              |
| GRM4    | glutamate metabotropic receptor 4                              |
| GRM5    | glutamate metabotropic receptor 5                              |
| GRM6    | glutamate metabotropic receptor 6                              |
| GRM7    | glutamate metabotropic receptor 7                              |
| GRM8    | glutamate metabotropic receptor 8                              |
| GRP     | gastrin releasing peptide                                      |
| GTF2I   | general transcription factor Iii                               |
| GUCY2D  | guanylate cyclase 2D, retinal                                  |
| HCRT1   | hypocretin receptor 1                                          |
| HCRT2   | hypocretin receptor 2                                          |
| HIP1    | huntingtin interacting protein 1                               |
| HINT1   | histidine triad nucleotide binding protein 1                   |
| HMGB1   | high mobility group box 1                                      |
| NR4A1   | nuclear receptor subfamily 4 group A member 1                  |
| HRH1    | histamine receptor H1                                          |
| PRMT2   | protein arginine methyltransferase 2                           |
| HTR1A   | 5-hydroxytryptamine receptor 1A                                |
| HTR1B   | 5-hydroxytryptamine receptor 1B                                |
| HTR1E   | 5-hydroxytryptamine receptor 1E                                |
| HTR1F   | 5-hydroxytryptamine receptor 1F                                |
| HTR2A   | 5-hydroxytryptamine receptor 2A                                |
| HTR5A   | 5-hydroxytryptamine receptor 5A                                |
| HTR6    | 5-hydroxytryptamine receptor 6                                 |
| IFI16   | interferon gamma inducible protein 16                          |
| IFNAR2  | interferon alpha and beta receptor subunit 2                   |
| IFNGR1  | interferon gamma receptor 1                                    |
| IFNGR2  | interferon gamma receptor 2 (interferon gamma transducer 1)    |
| IGF1R   | insulin like growth factor 1 receptor                          |
| IGF2R   | insulin like growth factor 2 receptor                          |
| IGFALS  | insulin like growth factor binding protein acid labile subunit |
| IL1B    | interleukin 1 beta                                             |
| IL2RA   | interleukin 2 receptor subunit alpha                           |
| IL6     | interleukin 6                                                  |
| IL6R    | interleukin 6 receptor                                         |
| IL12A   | interleukin 12A                                                |
| IL12RB1 | interleukin 12 receptor subunit beta 1                         |
| IL15    | interleukin 15                                                 |
| IL15RA  | interleukin 15 receptor subunit alpha                          |
| ING2    | inhibitor of growth family member 2                            |
| INHBA   | inhibin beta A                                                 |
| INPP5D  | inositol polyphosphate-5-phosphatase D                         |
| INSR    | insulin receptor                                               |
| ITPK1   | inositol-tetrakisphosphate 1-kinase                            |
| ITPKA   | inositol-trisphosphate 3-kinase A                              |
| ITPR3   | inositol 1,4,5-trisphosphate receptor type 3                   |
| JAK2    | Janus kinase 2                                                 |
| KIT     | KIT proto-oncogene receptor tyrosine kinase                    |
| LALBA   | lactalbumin alpha                                              |
| STMN1   | stathmin 1                                                     |
| LEPR    | leptin receptor                                                |

|          |                                                                   |
|----------|-------------------------------------------------------------------|
| LETM1    | leucine zipper and EF-hand containing transmembrane protein 1     |
| LGALS1   | galectin 1                                                        |
| LGALS9   | galectin 9                                                        |
| LIFR     | leukemia inhibitory factor receptor alpha                         |
| LRP6     | LDL receptor related protein 6                                    |
| LTA      | lymphotoxin alpha                                                 |
| LTB      | lymphotoxin beta                                                  |
| LTBP2    | latent transforming growth factor beta binding protein 2          |
| BCAM     | basal cell adhesion molecule (Lutheran blood group)               |
| LY6E     | lymphocyte antigen 6 complex, locus E                             |
| LYN      | LYN proto-oncogene, Src family tyrosine kinase                    |
| TACSTD2  | tumor-associated calcium signal transducer 2                      |
| SMAD3    | SMAD family member 3                                              |
| SMAD7    | SMAD family member 7                                              |
| MAL      | mal, T-cell differentiation protein                               |
| MC3R     | melanocortin 3 receptor                                           |
| MCC      | mutated in colorectal cancers                                     |
| MCL1     | myeloid cell leukemia 1                                           |
| MDFI     | MyoD family inhibitor                                             |
| MAP3K3   | mitogen-activated protein kinase kinase kinase 3                  |
| KITLG    | KIT ligand                                                        |
| MAP3K9   | mitogen-activated protein kinase kinase kinase 9                  |
| MAP3K10  | mitogen-activated protein kinase kinase kinase 10                 |
| MAP3K11  | mitogen-activated protein kinase kinase kinase 11                 |
| MLLT4    | myeloid/lymphoid or mixed-lineage leukemia; translocated to, 4    |
| MPP3     | membrane palmitoylated protein 3                                  |
| MST1R    | macrophage stimulating 1 receptor                                 |
| MTNR1A   | melatonin receptor 1A                                             |
| MTNR1B   | melatonin receptor 1B                                             |
| MX1      | MX dynamin like GTPase 1                                          |
| MYD88    | myeloid differentiation primary response 88                       |
| GADD45B  | growth arrest and DNA damage inducible beta                       |
| MYO9B    | myosin IXB                                                        |
| PPP1R12B | protein phosphatase 1 regulatory subunit 12B                      |
| NEDD9    | neural precursor cell expressed, developmentally down-regulated 9 |
| NF2      | neurofibromin 2 (merlin)                                          |
| NFATC1   | nuclear factor of activated T-cells 1                             |
| NFKBIB   | NFKB inhibitor beta                                               |
| NMB      | neuromedin B                                                      |
| NMBR     | neuromedin B receptor                                             |
| NOTCH1   | notch 1                                                           |
| NPY      | neuropeptide Y                                                    |
| NOTCH2   | notch 2                                                           |
| NPM1     | nucleophosmin (nucleolar phosphoprotein B23, numatrin)            |
| NPR2     | natriuretic peptide receptor 2                                    |
| NPY5R    | neuropeptide Y receptor Y5                                        |
| NRTN     | neurturin                                                         |
| NTF3     | neurotrophin 3                                                    |
| NTRK2    | neurotrophic receptor tyrosine kinase 2                           |
| NTRK3    | neurotrophic receptor tyrosine kinase 3                           |
| ROR1     | receptor tyrosine kinase-like orphan receptor 1                   |
| ROR2     | receptor tyrosine kinase like orphan receptor 2                   |
| NTSR1    | neurotensin receptor 1 (high affinity)                            |
| OPRD1    | opioid receptor delta 1                                           |
| OPRM1    | opioid receptor mu 1                                              |
| OTX2     | orthodenticle homeobox 2                                          |
| OXT      | oxytocin/neurophysin I prepropeptide                              |
| P2RX1    | purinergic receptor P2X 1                                         |

|          |                                                                      |
|----------|----------------------------------------------------------------------|
| P2RX4    | purinergic receptor P2X 4                                            |
| P2RX7    | purinergic receptor P2X 7                                            |
| PAK1     | p21 (RAC1) activated kinase 1                                        |
| PDE4A    | phosphodiesterase 4A                                                 |
| PDE9A    | phosphodiesterase 9A                                                 |
| PDGFA    | platelet derived growth factor subunit A                             |
| PDGFRA   | platelet derived growth factor receptor alpha                        |
| PDGFRB   | platelet derived growth factor receptor beta                         |
| PDK1     | pyruvate dehydrogenase kinase 1                                      |
| PDPK1    | 3-phosphoinositide dependent protein kinase 1                        |
| PENK     | proenkephalin                                                        |
| PF4      | platelet factor 4                                                    |
| PGR      | progesterone receptor                                                |
| SERPINB9 | serpin family B member 9                                             |
| PIK3R1   | phosphoinositide-3-kinase regulatory subunit 1                       |
| PLA2G1B  | phospholipase A2 group IB                                            |
| PLCB2    | phospholipase C beta 2                                               |
| PLD1     | phospholipase D1                                                     |
| PLD2     | phospholipase D2                                                     |
| PML      | promyelocytic leukemia                                               |
| PPARG    | peroxisome proliferator activated receptor gamma                     |
| MED1     | mediator complex subunit 1                                           |
| PPM1A    | protein phosphatase, Mg <sup>2+</sup> /Mn <sup>2+</sup> dependent 1A |
| PPP5C    | protein phosphatase 5 catalytic subunit                              |
| PRKAA2   | protein kinase AMP-activated catalytic subunit alpha 2               |
| PKN1     | protein kinase N1                                                    |
| PKN2     | protein kinase N2                                                    |
| PRKG1    | protein kinase, cGMP-dependent, type I                               |
| PRKG2    | protein kinase, cGMP-dependent, type II                              |
| MAPK11   | mitogen-activated protein kinase 11                                  |
| MAPK10   | mitogen-activated protein kinase 10                                  |
| MAP2K6   | mitogen-activated protein kinase kinase 6                            |
| THAP12   | THAP domain containing 12                                            |
| PRLR     | prolactin receptor                                                   |
| PSEN1    | presenilin 1                                                         |
| PSEN2    | presenilin 2                                                         |
| PYY      | peptide YY                                                           |
| PTAFR    | platelet activating factor receptor                                  |
| PTCH1    | patched 1                                                            |
| PTGER3   | prostaglandin E receptor 3                                           |
| PTH      | parathyroid hormone                                                  |
| PTH1R    | parathyroid hormone 1 receptor                                       |
| PTK2     | protein tyrosine kinase 2                                            |
| PTK7     | protein tyrosine kinase 7 (inactive)                                 |
| PTN      | pleiotrophin                                                         |
| PTPN1    | protein tyrosine phosphatase, non-receptor type 1                    |
| PTPN11   | protein tyrosine phosphatase, non-receptor type 11                   |
| PTPRD    | protein tyrosine phosphatase, receptor type D                        |
| PTPRF    | protein tyrosine phosphatase, receptor type F                        |
| PTPRG    | protein tyrosine phosphatase, receptor type G                        |
| PTPRJ    | protein tyrosine phosphatase, receptor type J                        |
| RAD1     | RAD1 checkpoint DNA exonuclease                                      |
| PWP2     | PWP2 periodic tryptophan protein homolog (yeast)                     |
| RAD9A    | RAD9 checkpoint clamp component A                                    |
| RAD17    | RAD17 checkpoint clamp loader component                              |
| RALA     | RALA Ras like proto-oncogene A                                       |
| RALB     | RALB Ras like proto-oncogene B                                       |
| RANBP1   | RAN binding protein 1                                                |

|         |                                                        |
|---------|--------------------------------------------------------|
| RANGAP1 | Ran GTPase activating protein 1                        |
| RAP1GAP | RAP1 GTPase activating protein                         |
| RAP2A   | RAP2A, member of RAS oncogene family                   |
| RARB    | retinoic acid receptor beta                            |
| RCVRN   | recoverin                                              |
| RET     | ret proto-oncogene                                     |
| RGS1    | regulator of G-protein signaling 1                     |
| RGS2    | regulator of G-protein signaling 2                     |
| RGS3    | regulator of G-protein signaling 3                     |
| RGS12   | regulator of G-protein signaling 12                    |
| RGS16   | regulator of G-protein signaling 16                    |
| RHEB    | Ras homolog enriched in brain                          |
| RHO     | rhodopsin                                              |
| GRK1    | G protein-coupled receptor kinase 1                    |
| RIT1    | Ras like without CAAX 1                                |
| ROCK1   | Rho associated coiled-coil containing protein kinase 1 |
| ROS1    | ROS proto-oncogene 1, receptor tyrosine kinase         |
| RPS6KA2 | ribosomal protein S6 kinase A2                         |
| RREB1   | ras responsive element binding protein 1               |
| RTKN    | rhotekin                                               |
| RSU1    | Ras suppressor protein 1                               |
| RYK     | receptor-like tyrosine kinase                          |
| S100A11 | S100 calcium binding protein A11                       |
| SAG     | S-antigen; retina and pineal gland (arrestin)          |
| SCTR    | secretin receptor                                      |
| CCL2    | C-C motif chemokine ligand 2                           |
| CCL3    | C-C motif chemokine ligand 3                           |
| CCL19   | C-C motif chemokine ligand 19                          |
| CCL20   | C-C motif chemokine ligand 20                          |
| CXCL5   | C-X-C motif chemokine ligand 5                         |
| CX3CL1  | C-X3-C motif chemokine ligand 1                        |
| SECTM1  | secreted and transmembrane 1                           |
| MAP2K4  | mitogen-activated protein kinase kinase 4              |
| SFRP1   | secreted frizzled related protein 1                    |
| SFRP5   | secreted frizzled related protein 5                    |
| SH3BP2  | SH3 domain binding protein 2                           |
| SHH     | sonic hedgehog                                         |
| SOD1    | superoxide dismutase 1, soluble                        |
| SPG7    | SPG7, paraplegin matrix AAA peptidase subunit          |
| SRC     | SRC proto-oncogene, non-receptor tyrosine kinase       |
| SRP72   | signal recognition particle 72kDa                      |
| SRPK1   | SRSF protein kinase 1                                  |
| SRPK2   | SRSF protein kinase 2                                  |
| SSTR1   | somatostatin receptor 1                                |
| SSTR5   | somatostatin receptor 5                                |
| STAT3   | signal transducer and activator of transcription 3     |
| STAT4   | signal transducer and activator of transcription 4     |
| STAT6   | signal transducer and activator of transcription 6     |
| STC1    | stanniocalcin 1                                        |
| STK3    | serine/threonine kinase 3                              |
| TACR2   | tachykinin receptor 2                                  |
| TAC3    | tachykinin 3                                           |
| TACR1   | tachykinin receptor 1                                  |
| TACR3   | tachykinin receptor 3                                  |
| MAP3K7  | mitogen-activated protein kinase kinase kinase 7       |
| TBXA2R  | thromboxane A2 receptor                                |
| TCF7L2  | transcription factor 7 like 2                          |
| NR2F1   | nuclear receptor subfamily 2 group F member 1          |



|          |                                                                             |
|----------|-----------------------------------------------------------------------------|
| NR2F2    | nuclear receptor subfamily 2 group F member 2                               |
| TGFA     | transforming growth factor alpha                                            |
| TGFB1    | transforming growth factor beta 1                                           |
| TGFBR3   | transforming growth factor beta receptor 3                                  |
| KLF10    | Kruppel-like factor 10                                                      |
| TIE1     | tyrosine kinase with immunoglobulin like and EGF like domains 1             |
| TLE1     | transducin like enhancer of split 1                                         |
| TLE2     | transducin like enhancer of split 2                                         |
| TLE3     | transducin like enhancer of split 3                                         |
| TLR3     | toll like receptor 3                                                        |
| TLR4     | toll like receptor 4                                                        |
| TNF      | tumor necrosis factor                                                       |
| TNFAIP3  | TNF alpha induced protein 3                                                 |
| TNFAIP6  | TNF alpha induced protein 6                                                 |
| TP53     | tumor protein p53                                                           |
| TP73     | tumor protein p73                                                           |
| TPTE     | transmembrane phosphatase with tensin homology                              |
| TRAF3    | TNF receptor associated factor 3                                            |
| TRAF5    | TNF receptor associated factor 5                                            |
| TRIO     | trio Rho guanine nucleotide exchange factor                                 |
| TNFSF4   | tumor necrosis factor superfamily member 4                                  |
| TYRO3    | TYRO3 protein tyrosine kinase                                               |
| UCN      | urocortin                                                                   |
| VCP      | valosin containing protein                                                  |
| VDAC1    | voltage dependent anion channel 1                                           |
| VEGFA    | vascular endothelial growth factor A                                        |
| VEGFC    | vascular endothelial growth factor C                                        |
| VIPR1    | vasoactive intestinal peptide receptor 1                                    |
| VIPR2    | vasoactive intestinal peptide receptor 2                                    |
| TRPV1    | transient receptor potential cation channel subfamily V member 1            |
| WNT5A    | Wnt family member 5A                                                        |
| YWHAH    | tyrosine 3-monooxygenase/tryptophan 5-monooxygenase activation protein eta  |
| YWHAZ    | tyrosine 3-monooxygenase/tryptophan 5-monooxygenase activation protein zeta |
| ZIC1     | Zic family member 1                                                         |
| ZYX      | zyxin                                                                       |
| LRP8     | LDL receptor related protein 8                                              |
| CXCR4    | C-X-C motif chemokine receptor 4                                            |
| SCG2     | secretogranin II                                                            |
| NR4A3    | nuclear receptor subfamily 4 group A member 3                               |
| GPR68    | G protein-coupled receptor 68                                               |
| ANP32A   | acidic nuclear phosphoprotein 32 family member A                            |
| TRRAP    | transformation/transcription domain associated protein                      |
| OR1D5    | olfactory receptor family 1 subfamily D member 5                            |
| PIP5K1A  | phosphatidylinositol-4-phosphate 5-kinase type 1 alpha                      |
| ULK1     | unc-51 like autophagy activating kinase 1                                   |
| BCAR3    | breast cancer anti-estrogen resistance 3                                    |
| STK24    | serine/threonine kinase 24                                                  |
| NSMAF    | neutral sphingomyelinase activation associated factor                       |
| NCK2     | NCK adaptor protein 2                                                       |
| DYRK2    | dual specificity tyrosine phosphorylation regulated kinase 2                |
| CDC42BPA | CDC42 binding protein kinase alpha                                          |
| GALR3    | galanin receptor 3                                                          |
| MAP4K3   | mitogen-activated protein kinase kinase kinase kinase 3                     |
| PPFIA1   | PTPRF interacting protein alpha 1                                           |
| PIK3R3   | phosphoinositide-3-kinase regulatory subunit 3                              |
| CNTNAP1  | contactin associated protein 1                                              |

|           |                                                                       |
|-----------|-----------------------------------------------------------------------|
| IFITM1    | interferon induced transmembrane protein 1                            |
| CAMK1     | calcium/calmodulin dependent protein kinase I                         |
| MADD      | MAP kinase activating death domain                                    |
| MKNK1     | MAP kinase interacting serine/threonine kinase 1                      |
| RGS20     | regulator of G-protein signaling 20                                   |
| STC2      | stanniocalcin 2                                                       |
| TP63      | tumor protein p63                                                     |
| IRS2      | insulin receptor substrate 2                                          |
| TRADD     | TNFRSF1A associated via death domain                                  |
| TNFRSF25  | tumor necrosis factor receptor superfamily member 25                  |
| RIPK1     | receptor interacting serine/threonine kinase 1                        |
| TNFSF9    | tumor necrosis factor superfamily member 9                            |
| CD164     | CD164 molecule                                                        |
| RIPK2     | receptor interacting serine/threonine kinase 2                        |
| FADD      | Fas associated via death domain                                       |
| TNFRSF18  | tumor necrosis factor receptor superfamily member 18                  |
| RGS9      | regulator of G-protein signaling 9                                    |
| TNFRSF11A | tumor necrosis factor receptor superfamily member 11a                 |
| TNFRSF10A | tumor necrosis factor receptor superfamily member 10a                 |
| PEX11A    | peroxisomal biogenesis factor 11 alpha                                |
| IL1RL2    | interleukin 1 receptor like 2                                         |
| GALR2     | galanin receptor 2                                                    |
| FGF18     | fibroblast growth factor 18                                           |
| NRP1      | neuropilin 1                                                          |
| CFLAR     | CASP8 and FADD like apoptosis regulator                               |
| WISP3     | WNT1 inducible signaling pathway protein 3                            |
| NR1I2     | nuclear receptor subfamily 1 group I member 2                         |
| ARHGEF7   | Rho guanine nucleotide exchange factor 7                              |
| SPHK1     | sphingosine kinase 1                                                  |
| SQSTM1    | sequestosome 1                                                        |
| CACNA1I   | calcium voltage-gated channel subunit alpha1 I                        |
| FOXH1     | forkhead box H1                                                       |
| SKAP2     | src kinase associated phosphoprotein 2                                |
| BTRC      | beta-transducin repeat containing E3 ubiquitin protein ligase         |
| RPS6KA4   | ribosomal protein S6 kinase A4                                        |
| LIMD1     | LIM domains containing 1                                              |
| KALRN     | kalirin, RhoGEF kinase                                                |
| CDKL2     | cyclin dependent kinase like 2                                        |
| F2RL3     | F2R like thrombin/trypsin receptor 3                                  |
| MPZL1     | myelin protein zero like 1                                            |
| SOCS3     | suppressor of cytokine signaling 3                                    |
| DOK2      | docking protein 2                                                     |
| ARTN      | artemin                                                               |
| MTA1      | metastasis associated 1                                               |
| SMC3      | structural maintenance of chromosomes 3                               |
| HGS       | hepatocyte growth factor-regulated tyrosine kinase substrate          |
| LPAR2     | lysophosphatidic acid receptor 2                                      |
| MAP3K13   | mitogen-activated protein kinase kinase kinase 13                     |
| OSMR      | oncostatin M receptor                                                 |
| VAPB      | VAMP (vesicle-associated membrane protein)-associated protein B and C |
| VAPA      | VAMP associated protein A                                             |
| MAG11     | membrane associated guanylate kinase, WW and PDZ domain containing 1  |
| MAPKAPK2  | mitogen-activated protein kinase-activated protein kinase 2           |
| STK17B    | serine/threonine kinase 17b                                           |
| GPR55     | G protein-coupled receptor 55                                         |
| SOCS6     | suppressor of cytokine signaling 6                                    |
| CD83      | CD83 molecule                                                         |
| TRIP10    | thyroid hormone receptor interactor 10                                |

|          |                                                                               |
|----------|-------------------------------------------------------------------------------|
| TGFBRAP1 | transforming growth factor beta receptor associated protein 1                 |
| GRAP2    | GRB2-related adaptor protein 2                                                |
| ECEL1    | endothelin converting enzyme-like 1                                           |
| EIF2AK3  | eukaryotic translation initiation factor 2 alpha kinase 3                     |
| HOMER3   | homer scaffolding protein 3                                                   |
| HOMER2   | homer scaffolding protein 2                                                   |
| AKAP7    | A-kinase anchoring protein 7                                                  |
| SH3BP5   | SH3 domain binding protein 5                                                  |
| MAPK8IP1 | mitogen-activated protein kinase 8 interacting protein 1                      |
| ADAMTS1  | ADAM metalloproteinase with thrombospondin type 1 motif 1                     |
| LITAF    | lipopolysaccharide induced TNF factor                                         |
| GDF15    | growth differentiation factor 15                                              |
| BCAR1    | BCAR1, Cas family scaffolding protein                                         |
| GTPBP1   | GTP binding protein 1                                                         |
| GABBR2   | gamma-aminobutyric acid type B receptor subunit 2                             |
| BRE      | brain and reproductive organ-expressed (TNFRSF1A modulator)                   |
| CDC42BPB | CDC42 binding protein kinase beta                                             |
| CARTPT   | CART prepropeptide                                                            |
| RIN1     | Ras and Rab interactor 1                                                      |
| GNA14    | G protein subunit alpha 14                                                    |
| FEZ2     | fasciculation and elongation protein zeta 2                                   |
| IKBKE    | inhibitor of kappa light polypeptide gene enhancer in B-cells, kinase epsilon |
| SOCS5    | suppressor of cytokine signaling 5                                            |
| CEP57    | centrosomal protein 57                                                        |
| MTSS1    | metastasis suppressor 1                                                       |
| ARHGEF11 | Rho guanine nucleotide exchange factor 11                                     |
| ELMO1    | engulfment and cell motility 1                                                |
| FARP2    | FERM, ARH/RhoGEF and pleckstrin domain protein 2                              |
| MED24    | mediator complex subunit 24                                                   |
| TLK1     | tousled like kinase 1                                                         |
| MFN2     | mitofusin 2                                                                   |
| MED13    | mediator complex subunit 13                                                   |
| CASP8AP2 | caspase 8 associated protein 2                                                |
| NR2E3    | nuclear receptor subfamily 2 group E member 3                                 |
| TANK     | TRAF family member associated NFKB activator                                  |
| MED16    | mediator complex subunit 16                                                   |
| SH2D3C   | SH2 domain containing 3C                                                      |
| PTPRU    | protein tyrosine phosphatase, receptor type U                                 |
| OPTN     | optineurin                                                                    |
| NAMPT    | nicotinamide phosphoribosyltransferase                                        |
| ARFRP1   | ADP ribosylation factor related protein 1                                     |
| G3BP1    | G3BP stress granule assembly factor 1                                         |
| WASF2    | WAS protein family member 2                                                   |
| TNK2     | tyrosine kinase non receptor 2                                                |
| KLRG1    | killer cell lectin like receptor G1                                           |
| CNKS1R1  | connector enhancer of kinase suppressor of Ras 1                              |
| RAMP1    | receptor activity modifying protein 1                                         |
| AKAP8    | A-kinase anchoring protein 8                                                  |
| NET1     | neuroepithelial cell transforming 1                                           |
| RGS19    | regulator of G-protein signaling 19                                           |
| APC2     | adenomatosis polyposis coli 2                                                 |
| PAK4     | p21 (RAC1) activated kinase 4                                                 |
| NMUR1    | neuromedin U receptor 1                                                       |
| TLR6     | toll like receptor 6                                                          |
| NOD1     | nucleotide binding oligomerization domain containing 1                        |
| DLC1     | DLC1 Rho GTPase activating protein                                            |
| TAB1     | TGF-beta activated kinase 1/MAP3K7 binding protein 1                          |
| BAIAP2   | BAI1 associated protein 2                                                     |

|           |                                                          |
|-----------|----------------------------------------------------------|
| MERTK     | MER proto-oncogene, tyrosine kinase                      |
| CAP2      | CAP, adenylate cyclase-associated protein, 2 (yeast)     |
| STK25     | serine/threonine kinase 25                               |
| SORBS1    | sorbin and SH3 domain containing 1                       |
| CDC42EP3  | CDC42 effector protein 3                                 |
| SH2B2     | SH2B adaptor protein 2                                   |
| TBL3      | transducin beta like 3                                   |
| RGS14     | regulator of G-protein signaling 14                      |
| CAMKK2    | calcium/calmodulin-dependent protein kinase kinase 2     |
| RRAGA     | Ras related GTP binding A                                |
| KLRA1P    | killer cell lectin like receptor A1, pseudogene          |
| CHL1      | cell adhesion molecule L1 like                           |
| TRAF3IP2  | TRAF3 interacting protein 2                              |
| PLK2      | polo like kinase 2                                       |
| NEK6      | NIMA related kinase 6                                    |
| IQGAP2    | IQ motif containing GTPase activating protein 2          |
| FRS3      | fibroblast growth factor receptor substrate 3            |
| FRS2      | fibroblast growth factor receptor substrate 2            |
| NPFRR2    | neuropeptide FF receptor 2                               |
| RUNDC3A   | RUN domain containing 3A                                 |
| BRD8      | bromodomain containing 8                                 |
| LILRB3    | leukocyte immunoglobulin like receptor B3                |
| ADAP1     | ArfGAP with dual PH domains 1                            |
| RAPGEF4   | Rap guanine nucleotide exchange factor 4                 |
| PRDM4     | PR domain 4                                              |
| PTPRT     | protein tyrosine phosphatase, receptor type T            |
| FAF1      | Fas associated factor 1                                  |
| CHEK2     | checkpoint kinase 2                                      |
| AKAP11    | A-kinase anchoring protein 11                            |
| AKAP10    | A-kinase anchoring protein 10                            |
| DUSP10    | dual specificity phosphatase 10                          |
| GPR176    | G protein-coupled receptor 176                           |
| GPR45     | G protein-coupled receptor 45                            |
| PARK7     | Parkinsonism associated deglycase                        |
| STK38     | serine/threonine kinase 38                               |
| MRAS      | muscle RAS oncogene homolog                              |
| CARD8     | caspase recruitment domain family member 8               |
| KIFAP3    | kinesin associated protein 3                             |
| ATF6      | activating transcription factor 6                        |
| SCAP      | SREBF chaperone                                          |
| ACIN1     | apoptotic chromatin condensation inducer 1               |
| TNIK      | TRAF2 and NCK interacting kinase                         |
| ERC1      | ELKS/RAB6-interacting/CAST family member 1               |
| PEG10     | paternally expressed 10                                  |
| TAB2      | TGF-beta activated kinase 1/MAP3K7 binding protein 2     |
| MAPK8IP3  | mitogen-activated protein kinase 8 interacting protein 3 |
| ITGB3BP   | integrin subunit beta 3 binding protein                  |
| TNFRSF13B | tumor necrosis factor receptor superfamily member 13B    |
| MAPK8IP2  | mitogen-activated protein kinase 8 interacting protein 2 |
| RBFOX2    | RNA binding protein, fox-1 homolog 2                     |
| DDAH2     | dimethylarginine dimethylaminohydrolase 2                |
| ARL2BP    | ADP ribosylation factor like GTPase 2 binding protein    |
| DDAH1     | dimethylarginine dimethylaminohydrolase 1                |
| CBLC      | Cbl proto-oncogene C                                     |
| PRKD3     | protein kinase D3                                        |
| FKBP8     | FK506 binding protein 8                                  |
| CBY1      | chibby homolog 1 (Drosophila)                            |
| PITPNC1   | phosphatidylinositol transfer protein, cytoplasmic 1     |

|           |                                                              |
|-----------|--------------------------------------------------------------|
| FGF20     | fibroblast growth factor 20                                  |
| LATS2     | large tumor suppressor kinase 2                              |
| RPS6KC1   | ribosomal protein S6 kinase C1                               |
| ATP2C1    | ATPase secretory pathway Ca <sup>2+</sup> transporting 1     |
| PDE7B     | phosphodiesterase 7B                                         |
| CIDEB     | cell death-inducing DFFA-like effector b                     |
| IL17C     | interleukin 17C                                              |
| OXGR1     | oxoglutarate receptor 1                                      |
| CECR2     | CECR2, histone acetyl-lysine reader                          |
| DBNL      | drebrin like                                                 |
| HIPK2     | homeodomain interacting protein kinase 2                     |
| TBK1      | TANK binding kinase 1                                        |
| CARD10    | caspase recruitment domain family member 10                  |
| PKN3      | protein kinase N3                                            |
| TRHDE     | thyrotropin releasing hormone degrading enzyme               |
| MDFIC     | MyoD family inhibitor domain containing                      |
| PILRA     | paired immunoglobulin like type 2 receptor alpha             |
| KCNIP3    | potassium voltage-gated channel interacting protein 3        |
| KCNIP2    | potassium voltage-gated channel interacting protein 2        |
| KCNIP1    | potassium voltage-gated channel interacting protein 1        |
| PDE11A    | phosphodiesterase 11A                                        |
| SOST      | sclerostin                                                   |
| NDUFA13   | NADH:ubiquinone oxidoreductase subunit A13                   |
| APH1A     | aph-1 homolog A, gamma-secretase subunit                     |
| RXFP3     | relaxin/insulin like family peptide receptor 3               |
| GMIP      | GEM interacting protein                                      |
| TAOK3     | TAO kinase 3                                                 |
| UBR5      | ubiquitin protein ligase E3 component n-recognin 5           |
| CABP2     | calcium binding protein 2                                    |
| TRIAP1    | TP53 regulated inhibitor of apoptosis 1                      |
| CXXC5     | CXXC finger protein 5                                        |
| STYXL1    | serine/threonine/tyrosine interacting-like 1                 |
| NLK       | nemo like kinase                                             |
| ZAK       | sterile alpha motif and leucine zipper containing kinase AZK |
| CALML5    | calmodulin like 5                                            |
| PRKAG3    | protein kinase AMP-activated non-catalytic subunit gamma 3   |
| DUOX1     | dual oxidase 1                                               |
| CYCS      | cytochrome c, somatic                                        |
| GPR85     | G protein-coupled receptor 85                                |
| ZDHHC13   | zinc finger DHHC-type containing 13                          |
| DLL4      | delta like canonical Notch ligand 4                          |
| GTPBP2    | GTP binding protein 2                                        |
| ARHGEF10L | Rho guanine nucleotide exchange factor 10 like               |
| MAML3     | mastermind like transcriptional coactivator 3                |
| CDC42BPG  | CDC42 binding protein kinase gamma                           |
| CDKN2AIP  | CDKN2A interacting protein                                   |
| GNG12     | G protein subunit gamma 12                                   |
| PARD3     | par-3 family cell polarity regulator                         |
| LTB4R2    | leukotriene B4 receptor 2                                    |
| CDC42SE1  | CDC42 small effector 1                                       |
| NMUR2     | neuromedin U receptor 2                                      |
| DUSP22    | dual specificity phosphatase 22                              |
| OTUD7B    | OTU deubiquitinase 7B                                        |
| CDC42SE2  | CDC42 small effector 2                                       |
| CTNNBIP1  | catenin beta interacting protein 1                           |
| SLC44A2   | solute carrier family 44 member 2                            |
| SMURF1    | SMAD specific E3 ubiquitin protein ligase 1                  |
| PLEKHG5   | pleckstrin homology and RhoGEF domain containing G5          |

|                              |                                                                          |
|------------------------------|--------------------------------------------------------------------------|
| CASKIN1                      | CASK interacting protein 1                                               |
| CALCOCO1                     | calcium binding and coiled-coil domain 1                                 |
| MIER1                        | MIER1 transcriptional regulator                                          |
| NLRC4                        | NLR family, CARD domain containing 4                                     |
| SNX6                         | sorting nexin 6                                                          |
| SIGIRR                       | single immunoglobulin and toll-interleukin 1 receptor (TIR) domain       |
| PROK2                        | prokineticin 2                                                           |
| MOAP1                        | modulator of apoptosis 1                                                 |
| RRAGC                        | Ras related GTP binding C                                                |
| NOD2                         | nucleotide binding oligomerization domain containing 2                   |
| CARD9                        | caspace recruitment domain family member 9                               |
| ARAP3                        | ArfGAP with RhoGAP domain, ankyrin repeat and PH domain 3                |
| CLEC7A                       | C-type lectin domain family 7 member A                                   |
| WNK1                         | WNK lysine deficient protein kinase 1                                    |
| WNK4                         | WNK lysine deficient protein kinase 4                                    |
| WNK2                         | WNK lysine deficient protein kinase 2                                    |
| WLS                          | wntless Wnt ligand secretion mediator                                    |
| PREX2                        | phosphatidylinositol-3,4,5-trisphosphate dependent Rac exchange factor 2 |
| NDFIP1                       | Nedd4 family interacting protein 1                                       |
| DUSP16                       | dual specificity phosphatase 16                                          |
| APOL3                        | apolipoprotein L3                                                        |
| VOPP1                        | vesicular, overexpressed in cancer, prosurvival protein 1                |
| CCM2                         | CCM2 scaffolding protein                                                 |
| TRAF7                        | TNF receptor associated factor 7                                         |
| MAML2                        | mastermind like transcriptional coactivator 2                            |
| BRSK1                        | BR serine/threonine kinase 1                                             |
| KIAA1804                     | mixed lineage kinase 4                                                   |
| AFAP1L2                      | actin filament associated protein 1 like 2                               |
| NLRP12                       | NLR family, pyrin domain containing 12                                   |
| RASGRP4                      | RAS guanyl releasing protein 4                                           |
| ARAP1                        | ArfGAP with RhoGAP domain, ankyrin repeat and PH domain 1                |
| CANT1                        | calcium activated nucleotidase 1                                         |
| EDARADD                      | EDAR-associated death domain                                             |
| MIB2                         | mindbomb E3 ubiquitin protein ligase 2                                   |
| SIK1                         | salt inducible kinase 1                                                  |
| NFAM1                        | NFAT activating protein with ITAM motif 1                                |
| ROPN1B                       | rhopilin associated tail protein 1B                                      |
| FGD5                         | FYVE, RhoGEF and PH domain containing 5                                  |
| SPRED1                       | sprouty related EVH1 domain containing 1                                 |
| DEDD2                        | death effector domain containing 2                                       |
| EID2                         | EP300 interacting inhibitor of differentiation 2                         |
| NLRC3                        | NLR family, CARD domain containing 3                                     |
| SPRED2                       | sprouty related EVH1 domain containing 2                                 |
| ARHGAP27                     | Rho GTPase activating protein 27                                         |
| FGD2                         | FYVE, RhoGEF and PH domain containing 2                                  |
| RICTOR                       | RPTOR independent companion of MTOR complex 2                            |
| EPGN                         | epithelial mitogen                                                       |
| CRIPAK                       | cysteine rich PAK1 inhibitor                                             |
| VWC2                         | von Willebrand factor C domain containing 2                              |
| AGRN                         | agrin                                                                    |
| CCR2                         | C-C motif chemokine receptor 2                                           |
| <b>Generation of neurons</b> |                                                                          |
| <b>Gene Symbol</b>           | <b>Name Gene</b>                                                         |
| ATP2B2                       | ATPase plasma membrane Ca <sup>2+</sup> transporting 2                   |
| DTX1                         | deltex 1                                                                 |
| GDNF                         | glial cell derived neurotrophic factor                                   |
| GLI2                         | GLI family zinc finger 2                                                 |
| MAPT                         | microtubule associated protein tau                                       |

|          |                                                                              |
|----------|------------------------------------------------------------------------------|
| NRCAM    | neuronal cell adhesion molecule                                              |
| NRTN     | neurturin                                                                    |
| PAX2     | paired box 2                                                                 |
| SERPINF1 | serpin family F member 1                                                     |
| ROBO1    | roundabout guidance receptor 1                                               |
| ROBO2    | roundabout guidance receptor 2                                               |
| RTN1     | reticulon 1                                                                  |
| SHH      | sonic hedgehog                                                               |
| UBB      | ubiquitin B                                                                  |
| YWHAG    | tyrosine 3-monooxygenase/tryptophan 5-monooxygenase activation protein gamma |
| SEMA3B   | semaphorin 3B                                                                |
| UNC5C    | unc-5 netrin receptor C                                                      |
| NRP2     | neuropilin 2                                                                 |
| NRP1     | neuropilin 1                                                                 |
| LDB1     | LIM domain binding 1                                                         |
| BRSK2    | BR serine/threonine kinase 2                                                 |
| ARTN     | artemin                                                                      |
| NRXN3    | neurexin 3                                                                   |
| NRXN1    | neurexin 1                                                                   |
| FEZ2     | fasciculation and elongation protein zeta 2                                  |
| FARP2    | FERM, ARH/RhoGEF and pleckstrin domain protein 2                             |
| SPON2    | spondin 2                                                                    |
| BAIAP2   | BAI1 associated protein 2                                                    |
| SEMA4F   | ssemaphorin 4F                                                               |
| CIT      | citron rho-interacting serine/threonine kinase                               |
| NTNG1    | netrin G1                                                                    |
| NLGN1    | neuroligin 1                                                                 |
| CYFIP1   | cytoplasmic FMR1 interacting protein 1                                       |
| NPTN     | neuroplastin                                                                 |
| RND1     | Rho family GTPase 1                                                          |
| MAP1S    | microtubule associated protein 1S                                            |
| PARD3    | par-3 family cell polarity regulator                                         |
| RTN4     | reticulon 4                                                                  |
| LRRC4C   | leucine rich repeat containing 4C                                            |
| NTNG2    | netrin G2                                                                    |
| RTN4RL1  | reticulon 4 receptor like 1                                                  |
| CNTN4    | contactin 4                                                                  |
| MDGA1    | MAM domain containing glycosylphosphatidylinositol anchor 1                  |
| AGRN     | agrin                                                                        |

### Neurogenesis

| Gene Symbol | Name Gene                                              |
|-------------|--------------------------------------------------------|
| ATP2B2      | ATPase plasma membrane Ca <sup>2+</sup> transporting 2 |
| CLN5        | ceroid-lipofuscinosis, neuronal 5                      |
| DTX1        | deltex 1                                               |
| GDNF        | glial cell derived neurotrophic factor                 |
| GLI2        | GLI family zinc finger 2                               |
| MAPT        | microtubule associated protein tau                     |
| NRCAM       | neuronal cell adhesion molecule                        |
| NRTN        | neurturin                                              |
| PAX2        | paired box 2                                           |
| SERPINF1    | serpin family F member 1                               |
| ROBO1       | roundabout guidance receptor 1                         |
| ROBO2       | roundabout guidance receptor 2                         |
| RTN1        | reticulon 1                                            |
| SHH         | sonic hedgehog                                         |
| SOD1        | superoxide dismutase 1, soluble                        |
| UBB         | ubiquitin B                                            |

|                               |                                                                              |
|-------------------------------|------------------------------------------------------------------------------|
| YWHAG                         | tyrosine 3-monooxygenase/tryptophan 5-monooxygenase activation protein gamma |
| SEMA3B                        | semaphorin 3B                                                                |
| UNC5C                         | unc-5 netrin receptor C                                                      |
| NRP2                          | neuropilin 2                                                                 |
| NRP1                          | neuropilin 1                                                                 |
| LDB1                          | LIM domain binding 1                                                         |
| EIF2B3                        | eukaryotic translation initiation factor 2B subunit gamma                    |
| BRSK2                         | BR serine/threonine kinase 2                                                 |
| ARTN                          | artemin                                                                      |
| NRXN3                         | neurexin 3                                                                   |
| NRXN1                         | neurexin 1                                                                   |
| FEZ2                          | fasciculation and elongation protein zeta 2                                  |
| FARP2                         | FERM, ARH/RhoGEF and pleckstrin domain protein 2                             |
| SPON2                         | spondin 2                                                                    |
| BAIAP2                        | BAI1 associated protein 2                                                    |
| SEMA4F                        | ssemaphorin 4F                                                               |
| CIT                           | citron rho-interacting serine/threonine kinase                               |
| NTNG1                         | netrin G1                                                                    |
| NLGN1                         | neuroligin 1                                                                 |
| CYFIP1                        | cytoplasmic FMR1 interacting protein 1                                       |
| NPTN                          | neuroplastin                                                                 |
| RND1                          | Rho family GTPase 1                                                          |
| MAP1S                         | microtubule associated protein 1S                                            |
| PARD3                         | par-3 family cell polarity regulator                                         |
| RTN4                          | reticulon 4                                                                  |
| LRRC4C                        | leucine rich repeat containing 4C                                            |
| NTNG2                         | netrin G2                                                                    |
| RTN4RL1                       | reticulon 4 receptor like 1                                                  |
| CNTN4                         | contactin 4                                                                  |
| MDGA1                         | MAM domain containing glycosylphosphatidylinositol anchor 1                  |
| AGRN                          | agrin                                                                        |
| <b>Neuron differentiation</b> |                                                                              |
| <b>Gene Symbol</b>            | <b>Name Gene</b>                                                             |
| ATP2B2                        | ATPase plasma membrane Ca <sup>2+</sup> transporting 2                       |
| DTX1                          | deltex 1                                                                     |
| GDNF                          | glial cell derived neurotrophic factor                                       |
| GLI2                          | GLI family zinc finger 2                                                     |
| MAPT                          | microtubule associated protein tau                                           |
| NRCAM                         | neuronal cell adhesion molecule                                              |
| NRTN                          | neurturin                                                                    |
| PAX2                          | paired box 2                                                                 |
| ROBO1                         | roundabout guidance receptor 1                                               |
| ROBO2                         | roundabout guidance receptor 2                                               |
| RTN1                          | reticulon 1                                                                  |
| SHH                           | sonic hedgehog                                                               |
| UBB                           | ubiquitin B                                                                  |
| YWHAG                         | tyrosine 3-monooxygenase/tryptophan 5-monooxygenase activation protein gamma |
| SEMA3B                        | semaphorin 3B                                                                |
| UNC5C                         | unc-5 netrin receptor C                                                      |
| NRP2                          | neuropilin 2                                                                 |
| NRP1                          | neuropilin 1                                                                 |
| LDB1                          | LIM domain binding 1                                                         |
| BRSK2                         | BR serine/threonine kinase 2                                                 |
| NRXN3                         | neurexin 3                                                                   |
| NRXN1                         | neurexin 1                                                                   |
| FEZ2                          | fasciculation and elongation protein zeta 2                                  |



|                           |                                                             |
|---------------------------|-------------------------------------------------------------|
| FARP2                     | FERM, ARH/RhoGEF and pleckstrin domain protein 2            |
| SPON2                     | spondin 2                                                   |
| BAIAP2                    | BAI1 associated protein 2                                   |
| SEMA4F                    | ssemaphorin 4F                                              |
| NTNG1                     | netrin G1                                                   |
| NLGN1                     | neuroligin 1                                                |
| CYFIP1                    | cytoplasmic FMR1 interacting protein 1                      |
| RND1                      | Rho family GTPase 1                                         |
| MAP1S                     | microtubule associated protein 1S                           |
| PARD3                     | par-3 family cell polarity regulator                        |
| RTN4                      | reticulon 4                                                 |
| LRRC4C                    | leucine rich repeat containing 4C                           |
| NTNG2                     | netrin G2                                                   |
| RTN4RL1                   | reticulon 4 receptor like 1                                 |
| CNTN4                     | contactin 4                                                 |
| MDGA1                     | MAM domain containing glycosylphosphatidylinositol anchor 1 |
| VWC2                      | von Willebrand factor C domain containing 2                 |
| AGRN                      | agrin                                                       |
| <b>Neuron development</b> |                                                             |
| <b>Gene Symbol</b>        | <b>Name Gene</b>                                            |
| GDNF                      | glial cell derived neurotrophic factor                      |
| GLI2                      | GLI family zinc finger 2                                    |
| MAPT                      | microtubule associated protein tau                          |
| NRCAM                     | neuronal cell adhesion molecule                             |
| NRTN                      | neurturin                                                   |
| PAX2                      | paired box 2                                                |
| ROBO1                     | roundabout guidance receptor 1                              |
| ROBO2                     | roundabout guidance receptor 2                              |
| SHH                       | sonic hedgehog                                              |
| UBB                       | ubiquitin B                                                 |
| SEMA3B                    | semaphorin 3B                                               |
| UNC5C                     | unc-5 netrin receptor C                                     |
| NRP2                      | neuropilin 2                                                |
| NRP1                      | neuropilin 1                                                |
| NRXN3                     | neurexin 3                                                  |
| NRXN1                     | neurexin 1                                                  |
| FEZ2                      | fasciculation and elongation protein zeta 2                 |
| FARP2                     | FERM, ARH/RhoGEF and pleckstrin domain protein 2            |
| SPON2                     | spondin 2                                                   |
| BAIAP2                    | BAI1 associated protein 2                                   |
| SEMA4F                    | ssemaphorin 4F                                              |
| NTNG1                     | netrin G1                                                   |
| CYFIP1                    | cytoplasmic FMR1 interacting protein 1                      |
| RND1                      | Rho family GTPase 1                                         |
| MAP1S                     | microtubule associated protein 1S                           |
| PARD3                     | par-3 family cell polarity regulator                        |
| RTN4                      | reticulon 4                                                 |
| LRRC4C                    | leucine rich repeat containing 4C                           |
| NTNG2                     | netrin G2                                                   |
| RTN4RL1                   | reticulon 4 receptor like 1                                 |
| CNTN4                     | contactin 4                                                 |
| AGRN                      | agrin                                                       |
|                           | glial cell derived neurotrophic factor                      |
|                           | GLI family zinc finger 2                                    |
| GDNF                      | microtubule associated protein tau                          |
| GLI2                      | neuronal cell adhesion molecule                             |
| MAPT                      | neurturin                                                   |
| NRCAM                     | paired box 2                                                |

|                                                  |                                                          |
|--------------------------------------------------|----------------------------------------------------------|
| NRTN                                             | roundabout guidance receptor 1                           |
| PAX2                                             | roundabout guidance receptor 2                           |
| ROBO1                                            | sonic hedgehog                                           |
| ROBO2                                            | ubiquitin B                                              |
| SHH                                              | semaphorin 3B                                            |
| UBB                                              | unc-5 netrin receptor C                                  |
| SEMA3B                                           | neuropilin 2                                             |
| UNC5C                                            | neuropilin 1                                             |
| NRP2                                             | neurexin 3                                               |
| NRP1                                             | neurexin 1                                               |
| NRXN3                                            | fasciculation and elongation protein zeta 2              |
| NRXN1                                            | FERM, ARH/RhoGEF and pleckstrin domain protein 2         |
| FEZ2                                             | spondin 2                                                |
| FARP2                                            | BAI1 associated protein 2                                |
| SPON2                                            | ssemaphorin 4F                                           |
| BAIAP2                                           | netrin G1                                                |
| SEMA4F                                           | cytoplasmic FMR1 interacting protein 1                   |
| NTNG1                                            | Rho family GTPase 1                                      |
| CYFIP1                                           | microtubule associated protein 1S                        |
| RND1                                             | par-3 family cell polarity regulator                     |
| MAP1S                                            | reticulon 4                                              |
| PARD3                                            | leucine rich repeat containing 4C                        |
| RTN4                                             | netrin G2                                                |
| LRRC4C                                           | reticulon 4 receptor like 1                              |
| NTNG2                                            | contactin 4                                              |
| RTN4RL1                                          | agrin                                                    |
| CNTN4                                            | glial cell derived neurotrophic factor                   |
| AGRN                                             | GLI family zinc finger 2                                 |
| <b>Negative regulation of biological process</b> |                                                          |
| <b>Gene Symbol</b>                               | <b>Name Gene</b>                                         |
| ACTN1                                            | actinin alpha 1                                          |
| ACVR1                                            | activin A receptor type 1                                |
| ACVRL1                                           | activin A receptor like type 1                           |
| ADRA1A                                           | adrenoceptor alpha 1A                                    |
| ADRB3                                            | adrenoceptor beta 3                                      |
| ALOX15B                                          | arachidonate 15-lipoxygenase, type B                     |
| ANG                                              | angiogenin                                               |
| APBB2                                            | amyloid beta precursor protein binding family B member 2 |
| FAS                                              | Fas cell surface death receptor                          |
| RHOB                                             | ras homolog family member B                              |
| ARHGDI1A                                         | Rho GDP dissociation inhibitor alpha                     |
| BCL3                                             | B-cell CLL/lymphoma 3                                    |
| BCL6                                             | B-cell CLL/lymphoma 6                                    |
| PRDM1                                            | PR domain 1                                              |
| BMP7                                             | bone morphogenetic protein 7                             |
| BNIP2                                            | BCL2/adenovirus E1B 19kDa interacting protein 2          |
| BNIP3                                            | BCL2/adenovirus E1B 19kDa interacting protein 3          |
| BNIP3L                                           | BCL2/adenovirus E1B 19kDa interacting protein 3-like     |
| BRCA1                                            | breast cancer 1                                          |
| BRAF                                             | B-Raf proto-oncogene, serine/threonine kinase            |
| BTG1                                             | B-cell translocation gene 1, anti-proliferative          |
| CASP3                                            | caspase 3                                                |
| RUNX2                                            | runt related transcription factor 2                      |
| RUNX3                                            | runt related transcription factor 3                      |
| CD28                                             | CD28 molecule                                            |
| TNFRSF8                                          | tumor necrosis factor receptor superfamily member 8      |
| CD74                                             | CD74 molecule                                            |
| CDK1                                             | cyclin-dependent kinase 1                                |

|          |                                                                        |
|----------|------------------------------------------------------------------------|
| CDH13    | cadherin 13                                                            |
| CDKN1A   | cyclin-dependent kinase inhibitor 1A                                   |
| CENPF    | centromere protein F                                                   |
| CHEK1    | checkpoint kinase 1                                                    |
| FOXP3    | forkhead box N3                                                        |
| COL4A2   | collagen type IV alpha 2                                               |
| COL4A3   | collagen type IV alpha 3                                               |
| CRYAA    | crystallin alpha A                                                     |
| CTBP1    | C-terminal binding protein 1                                           |
| CTBP2    | C-terminal binding protein 2                                           |
| CUX1     | cut like homeobox 1                                                    |
| DAD1     | defender against cell death 1                                          |
| DAXX     | death-domain associated protein                                        |
| GADD45A  | growth arrest and DNA damage inducible alpha                           |
| DHCR24   | 24-dehydrocholesterol reductase                                        |
| DNMT1    | DNA (cytosine-5-)-methyltransferase 1                                  |
| DTX1     | deltex 1                                                               |
| EIF4G2   | eukaryotic translation initiation factor 4 gamma 2                     |
| ELANE    | elastase, neutrophil expressed                                         |
| ELK3     | ELK3, ETS transcription factor                                         |
| ENO1     | enolase 1                                                              |
| ERCC4    | excision repair cross-complementation group 4                          |
| ERN1     | endoplasmic reticulum to nucleus signaling 1                           |
| ETS1     | ETS proto-oncogene 1, transcription factor                             |
| F2       | coagulation factor II, thrombin                                        |
| FABP6    | fatty acid binding protein 6                                           |
| FOXC1    | forkhead box C1                                                        |
| FOXO1    | forkhead box O1                                                        |
| FRK      | fyn related Src family tyrosine kinase                                 |
| IFI6     | interferon alpha inducible protein 6                                   |
| GCK      | glucokinase                                                            |
| NR6A1    | nuclear receptor subfamily 6 group A member 1                          |
| GDNF     | glial cell derived neurotrophic factor                                 |
| GHSR     | growth hormone secretagogue receptor                                   |
| GCLC     | glutamate-cysteine ligase catalytic subunit                            |
| GLI2     | GLI family zinc finger 2                                               |
| GLRA1    | glycine receptor alpha 1                                               |
| GML      | glycosylphosphatidylinositol anchored molecule like                    |
| ARHGAP35 | Rho GTPase activating protein 35                                       |
| GRM8     | glutamate metabotropic receptor 8                                      |
| NRG1     | neuregulin 1                                                           |
| HMGB1    | high mobility group box 1                                              |
| IRF8     | interferon regulatory factor 8                                         |
| ID2      | inhibitor of DNA binding 2, HLH protein                                |
| ID3      | inhibitor of DNA binding 3, HLH protein                                |
| ID4      | inhibitor of DNA binding 4, HLH protein                                |
| IGF1R    | insulin like growth factor 1 receptor                                  |
| IGFBP3   | insulin like growth factor binding protein 3                           |
| IGFBP7   | insulin like growth factor binding protein 7                           |
| RBPJ     | recombination signal binding protein for immunoglobulin kappa J region |
| IL1B     | interleukin 1 beta                                                     |
| IL6      | interleukin 6                                                          |
| IL10     | interleukin 10                                                         |
| TNFRSF9  | tumor necrosis factor receptor superfamily member 9                    |
| ING1     | inhibitor of growth family member 1                                    |
| INHBA    | inhibin beta A                                                         |
| INHBB    | inhibin beta B                                                         |
| IRF2     | interferon regulatory factor 2                                         |

|          |                                                               |
|----------|---------------------------------------------------------------|
| IRF7     | interferon regulatory factor 7                                |
| KRT18    | keratin 18                                                    |
| LEP      | leptin                                                        |
| SMAD3    | SMAD family member 3                                          |
| MCL1     | myeloid cell leukemia 1                                       |
| MDFI     | MyoD family inhibitor                                         |
| MEIS2    | Meis homeobox 2                                               |
| MEN1     | menin 1                                                       |
| MNT      | MAX network transcriptional repressor                         |
| MXI1     | MAX interactor 1, dimerization protein                        |
| MYC      | v-myc avian myelocytomatosis viral oncogene homolog           |
| NAIP     | NLR family, apoptosis inhibitory protein                      |
| NDUFS3   | NADH:ubiquinone oxidoreductase core subunit S3                |
| NFKBIE   | NFKB inhibitor epsilon                                        |
| NFKBIL1  | NFKB inhibitor like 1                                         |
| TONSL    | tonsoku-like, DNA repair protein                              |
| NOTCH1   | notch 1                                                       |
| NOTCH2   | notch 2                                                       |
| NOTCH4   | notch 4                                                       |
| NPM1     | nucleophosmin (nucleolar phosphoprotein B23, numatrin)        |
| NPPB     | natriuretic peptide B                                         |
| NPR1     | natriuretic peptide receptor 1                                |
| OPA1     | OPA1, mitochondrial dynamin like GTPase                       |
| OPRM1    | opioid receptor mu 1                                          |
| OSM      | oncostatin M                                                  |
| SERPINE1 | serpin family E member 1                                      |
| PAWR     | pro-apoptotic WT1 regulator                                   |
| PAX7     | paired box 7                                                  |
| CHMP1A   | charged multivesicular body protein 1A                        |
| SERPINF1 | serpin family F member 1                                      |
| PEX14    | peroxisomal biogenesis factor 14                              |
| PF4      | platelet factor 4                                             |
| ATP8B1   | ATPase phospholipid transporting 8B1                          |
| SERPINB9 | serpin family B member 9                                      |
| PKHD1    | polycystic kidney and hepatic disease 1 (autosomal recessive) |
| PLAGL1   | PLAG1 like zinc finger 1                                      |
| PLG      | plasminogen                                                   |
| PML      | promyelocytic leukemia                                        |
| POU2F1   | POU class 2 homeobox 1                                        |
| PPARD    | peroxisome proliferator activated receptor delta              |
| PRKCZ    | protein kinase C zeta                                         |
| MAP2K6   | mitogen-activated protein kinase kinase 6                     |
| EIF2AK2  | eukaryotic translation initiation factor 2 alpha kinase 2     |
| THAP12   | THAP domain containing 12                                     |
| PROC     | protein C, inactivator of coagulation factors Va and VIIIa    |
| PSEN1    | presenilin 1                                                  |
| PTCH1    | patched 1                                                     |
| RAD9A    | RAD9 checkpoint clamp component A                             |
| RAD17    | RAD17 checkpoint clamp loader component                       |
| RARRES1  | retinoic acid receptor responder 1                            |
| RB1      | retinoblastoma 1                                              |
| RBBP4    | retinoblastoma binding protein 4                              |
| TRIM27   | tripartite motif containing 27                                |
| RTKN     | rhotekin                                                      |
| S100A11  | S100 calcium binding protein A11                              |
| ATXN1    | ataxin 1                                                      |
| CCL2     | C-C motif chemokine ligand 2                                  |
| SFRP1    | secreted frizzled related protein 1                           |

|          |                                                                                                   |
|----------|---------------------------------------------------------------------------------------------------|
| SFTPD    | surfactant protein D                                                                              |
| SHH      | sonic hedgehog                                                                                    |
| SNAI2    | snail family transcriptional repressor 2                                                          |
| SMARCC2  | SWI/SNF related, matrix associated, actin dependent regulator of chromatin subfamily c member 2   |
| SMARCE1  | SWI/SNF related, matrix associated, actin dependent regulator of chromatin, subfamily e, member 1 |
| SNCA     | synuclein alpha                                                                                   |
| SOD1     | superoxide dismutase 1, soluble                                                                   |
| SSTR5    | somatostatin receptor 5                                                                           |
| STAT3    | signal transducer and activator of transcription 3                                                |
| STK11    | serine/threonine kinase 11                                                                        |
| TBX2     | T-box 2                                                                                           |
| TBX5     | T-box 5                                                                                           |
| TBX3     | T-box 3                                                                                           |
| VPS72    | vacuolar protein sorting 72 homolog                                                               |
| PRDX2    | peroxiredoxin 2                                                                                   |
| TGFB111  | transforming growth factor beta 1 induced transcript 1                                            |
| KLF10    | Kruppel-like factor 10                                                                            |
| TLE1     | transducin like enhancer of split 1                                                               |
| TM4SF4   | transmembrane 4 L six family member 4                                                             |
| TNF      | tumor necrosis factor                                                                             |
| TNFAIP3  | TNF alpha induced protein 3                                                                       |
| TNNI3    | troponin I3, cardiac type                                                                         |
| TNP1     | transition protein 1                                                                              |
| TWIST1   | twist family bHLH transcription factor 1                                                          |
| NR1H2    | nuclear receptor subfamily 1 group H member 2                                                     |
| VEGFA    | vascular endothelial growth factor A                                                              |
| VHL      | von Hippel-Lindau tumor suppressor                                                                |
| WARS     | tryptophanyl-tRNA synthetase                                                                      |
| YWHAH    | tyrosine 3-monooxygenase/tryptophan 5-monooxygenase activation protein eta                        |
| YWHAZ    | tyrosine 3-monooxygenase/tryptophan 5-monooxygenase activation protein zeta                       |
| ZBTB16   | zinc finger and BTB domain containing 16                                                          |
| ZBTB17   | zinc finger and BTB domain containing 17                                                          |
| ZNF189   | zinc finger protein 189                                                                           |
| BTG2     | BTG family member 2                                                                               |
| SCG2     | secretogranin II                                                                                  |
| CUL5     | cullin 5                                                                                          |
| BAP1     | BRCA1 associated protein 1                                                                        |
| CDC45    | cell division cycle 45                                                                            |
| NCK2     | NCK adaptor protein 2                                                                             |
| CUL4A    | cullin 4A                                                                                         |
| CUL2     | cullin 2                                                                                          |
| CUL1     | cullin 1                                                                                          |
| PPM1D    | protein phosphatase, Mg <sup>2+</sup> /Mn <sup>2+</sup> dependent 1D                              |
| IFITM1   | interferon induced transmembrane protein 1                                                        |
| CBX4     | chromobox 4                                                                                       |
| TP63     | tumor protein p63                                                                                 |
| HRK      | harakiri, BCL2 interacting protein                                                                |
| CD164    | CD164 molecule                                                                                    |
| TNFRSF18 | tumor necrosis factor receptor superfamily member 18                                              |
| CFLAR    | CASP8 and FADD like apoptosis regulator                                                           |
| NR1I2    | nuclear receptor subfamily 1 group I member 2                                                     |
| LDB1     | LIM domain binding 1                                                                              |
| IER3     | immediate early response 3                                                                        |
| SPHK1    | sphingosine kinase 1                                                                              |

|          |                                                                         |
|----------|-------------------------------------------------------------------------|
| TAX1BP1  | Tax1 binding protein 1                                                  |
| SOCS3    | suppressor of cytokine signaling 3                                      |
| HGS      | hepatocyte growth factor-regulated tyrosine kinase substrate            |
| ARHGEF2  | Rho/Rac guanine nucleotide exchange factor 2                            |
| DEDD     | death effector domain containing                                        |
| DLG5     | discs large homolog 5                                                   |
| AIMP1    | aminoacyl tRNA synthetase complex interacting multifunctional protein 1 |
| KLF4     | Kruppel-like factor 4 (gut)                                             |
| EIF2AK3  | eukaryotic translation initiation factor 2 alpha kinase 3               |
| ADAMTS1  | ADAM metalloproteinase with thrombospondin type 1 motif 1               |
| ZNF254   | zinc finger protein 254                                                 |
| TP53I11  | tumor protein p53 inducible protein 11                                  |
| BRE      | brain and reproductive organ-expressed (TNFRSF1A modulator)             |
| CARTPT   | CART prepropeptide                                                      |
| SOCS5    | suppressor of cytokine signaling 5                                      |
| HDAC9    | histone deacetylase 9                                                   |
| HDAC4    | histone deacetylase 4                                                   |
| SERTAD2  | SERTA domain containing 2                                               |
| MFN2     | mitofusin 2                                                             |
| HDAC5    | histone deacetylase 5                                                   |
| HIPK3    | homeodomain interacting protein kinase 3                                |
| YAF2     | YY1 associated factor 2                                                 |
| TOB1     | transducer of ERBB2, 1                                                  |
| DHRS2    | dehydrogenase/reductase (SDR family) member 2                           |
| SPEG     | SPEG complex locus                                                      |
| KATNB1   | katanin regulatory subunit B1                                           |
| DLC1     | DLC1 Rho GTPase activating protein                                      |
| GPNMB    | glycoprotein nmb                                                        |
| FST      | follistatin                                                             |
| ERN2     | endoplasmic reticulum to nucleus signaling 2                            |
| MXD4     | MAX dimerization protein 4                                              |
| CTCF     | CCCTC-binding factor                                                    |
| ZMYND11  | zinc finger MYND-type containing 11                                     |
| SRSF10   | serine/arginine-rich splicing factor 10                                 |
| ARID5A   | AT-rich interaction domain 5A                                           |
| BTG3     | BTG family member 3                                                     |
| WWP1     | WW domain containing E3 ubiquitin protein ligase 1                      |
| FAF1     | Fas associated factor 1                                                 |
| KLF12    | Kruppel-like factor 12                                                  |
| B4GALT7  | beta-1,4-galactosyltransferase 7                                        |
| ZHX2     | zinc fingers and homeoboxes 2                                           |
| CARD8    | caspase recruitment domain family member 8                              |
| MAPRE1   | microtubule associated protein RP/EB family member 1                    |
| MYO16    | myosin XVI                                                              |
| ERC1     | ELKS/RAB6-interacting/CAST family member 1                              |
| PEG10    | paternally expressed 10                                                 |
| ZNF423   | zinc finger protein 423                                                 |
| CLASP1   | cytoplasmic linker associated protein 1                                 |
| PPP1R13B | protein phosphatase 1 regulatory subunit 13B                            |
| SIRT4    | sirtuin 4                                                               |
| RYBP     | RING1 and YY1 binding protein                                           |
| ZNF281   | zinc finger protein 281                                                 |
| RBFOX2   | RNA binding protein, fox-1 homolog 2                                    |
| GTPBP4   | GTP binding protein 4                                                   |
| DDAH2    | dimethylarginine dimethylaminohydrolase 2                               |
| CBLC     | Cbl proto-oncogene C                                                    |
| PPP1R15A | protein phosphatase 1 regulatory subunit 15A                            |
| CBY1     | chibby homolog 1 (Drosophila)                                           |

|          |                                                                    |
|----------|--------------------------------------------------------------------|
| TNFAIP8  | TNF alpha induced protein 8                                        |
| BACE2    | beta-site APP-cleaving enzyme 2                                    |
| CLIC4    | chloride intracellular channel 4                                   |
| LATS2    | large tumor suppressor kinase 2                                    |
| AATF     | apoptosis antagonizing transcription factor                        |
| EIF2AK1  | eukaryotic translation initiation factor 2 alpha kinase 1          |
| RND1     | Rho family GTPase 1                                                |
| UTP20    | UTP20, small subunit processome component                          |
| PACSIN3  | protein kinase C and casein kinase substrate in neurons 3          |
| SERTAD3  | SERTA domain containing 3                                          |
| OSGIN1   | oxidative stress induced growth inhibitor 1                        |
| NOX4     | NADPH oxidase 4                                                    |
| SOST     | sclerostin                                                         |
| SH3GLB1  | SH3 domain containing GRB2 like endophilin B1                      |
| ING4     | inhibitor of growth family member 4                                |
| BFAR     | bifunctional apoptosis regulator                                   |
| PHF21A   | PHD finger protein 21A                                             |
| TAOK3    | TAO kinase 3                                                       |
| IP6K2    | inositol hexakisphosphate kinase 2                                 |
| TRIAP1   | TP53 regulated inhibitor of apoptosis 1                            |
| PIAS4    | protein inhibitor of activated STAT 4                              |
| NLK      | nemo like kinase                                                   |
| ATP8A2   | ATPase phospholipid transporting 8A2                               |
| ZAK      | sterile alpha motif and leucine zipper containing kinase AZK       |
| GATAD2A  | GATA zinc finger domain containing 2A                              |
| CDHR2    | cadherin related family member 2                                   |
| CDKN2AIP | CDKN2A interacting protein                                         |
| ATF7IP   | activating transcription factor 7 interacting protein              |
| LANCL2   | LanC like 2                                                        |
| RPRM     | reprimo, TP53 dependent G2 arrest mediator candidate               |
| OTUD7B   | OTU deubiquitinase 7B                                              |
| RTN4     | reticulon 4                                                        |
| SMURF1   | SMAD specific E3 ubiquitin protein ligase 1                        |
| STIM2    | stromal interaction molecule 2                                     |
| PHF12    | PHD finger protein 12                                              |
| CREBZF   | CREB/ATF bZIP transcription factor                                 |
| SNX6     | sorting nexin 6                                                    |
| SIGIRR   | single immunoglobulin and toll-interleukin 1 receptor (TIR) domain |
| PROK2    | prokineticin 2                                                     |
| DNAJC1   | DnaJ heat shock protein family (Hsp40) member C1                   |
| NSD1     | nuclear receptor binding SET domain protein 1                      |
| SUDS3    | SDS3 homolog, SIN3A corepressor complex component                  |
| COL18A1  | collagen type XVIII alpha 1                                        |
| CDT1     | chromatin licensing and DNA replication factor 1                   |
| ARID5B   | AT-rich interaction domain 5B                                      |
| ING5     | inhibitor of growth family member 5                                |
| AKT1S1   | AKT1 substrate 1                                                   |
| GLIS2    | GLIS family zinc finger 2                                          |
| SCIN     | scinderin                                                          |
| NLRP12   | NLR family, pyrin domain containing 12                             |
| ATPIF1   | ATPase inhibitory factor 1                                         |
| ARAP1    | ArfGAP with RhoGAP domain, ankyrin repeat and PH domain 1          |
| TWIST2   | twist family bHLH transcription factor 2                           |
| B4GALNT2 | beta-1,4-N-acetyl-galactosaminyltransferase 2                      |
| DMBX1    | diencephalon/mesencephalon homeobox 1                              |
| UHMK1    | U2AF homology motif (UHM) kinase 1                                 |
| FAM3D    | family with sequence similarity 3 member D                         |
| GLIS1    | GLIS family zinc finger 1                                          |

|         |                                                  |
|---------|--------------------------------------------------|
| CNTN4   | contactin 4                                      |
| EID2    | EP300 interacting inhibitor of differentiation 2 |
| TMPRSS6 | transmembrane protease, serine 6                 |
| GLIS3   | GLIS family zinc finger 3                        |
| HS3ST5  | heparan sulfate-glucosamine 3-sulfotransferase 5 |
| VWC2    | von Willebrand factor C domain containing 2      |



**Table S5.** Descriptive data in the groups defined by trajectories of anxiety disorders

**Table S5.** Descriptive data in the groups defined by trajectories of anxiety disorders

| Variables                  | TDC Group<br>n=14 | P-<br>value       | Persistent<br>Group n=14 | P-value           | Incident<br>Group n=11 | P-value           | Remittent<br>Group n=8 | P-value           | P-value                                                                                                                |
|----------------------------|-------------------|-------------------|--------------------------|-------------------|------------------------|-------------------|------------------------|-------------------|------------------------------------------------------------------------------------------------------------------------|
| Gender<br>(female, %)      | 08 (57.14%)       | .724 <sup>a</sup> | 08 (57.14%)              | .724 <sup>a</sup> | 05 (45.45%)            | .557 <sup>a</sup> | 04 (50%)               | .843 <sup>a</sup> | <sup>b</sup> 1.000; <sup>c</sup> .561; <sup>d</sup> .746; <sup>e</sup> .561 <sup>f</sup><br>.746 and <sup>g</sup> .845 |
| Age in 2013<br>(mean ± SD) | 17.96 ±<br>2.38   |                   | 18.32 ± 2.34             |                   | 17.27 ± 1.95           |                   | 19.63 ± 2.71           |                   | <sup>h</sup> .950; <sup>i</sup> .531; <sup>j</sup> .758; <sup>k</sup> .568; <sup>l</sup><br>.716 and <sup>m</sup> .389 |
| Ethnicity                  |                   |                   |                          |                   |                        |                   |                        |                   |                                                                                                                        |
| Caucasians                 | 06 (50%)          | .135              | 10 (71.43%)              | .541              | 08 (72.72%)            | .371              | 03 (37.5%)             | .150              | <sup>n</sup> .324; <sup>o</sup> .248; <sup>p</sup> .492; <sup>q</sup> .646; <sup>r</sup><br>.165 and <sup>s</sup> .077 |
| Brazilian                  | 02 (16.66%)       |                   | 01 (7.14%)               |                   | 0 (0%)                 |                   | 03 (37.5%)             |                   |                                                                                                                        |
| Africans                   |                   |                   |                          |                   |                        |                   |                        |                   |                                                                                                                        |
| Others                     | 04 (33.33%)       |                   | 03 (21.43%)              |                   | 03 (27.27%)            |                   | 02 (25%)               |                   |                                                                                                                        |

<sup>a</sup> Chi-square test. Differences between male and females inside each group.

<sup>b, c, d, e, f, g</sup> Chi-square test. Comparisons between male and female in the four groups. (<sup>b</sup> TDC vs Persistent; <sup>c</sup> TDC vs Incident; <sup>d</sup> TDC vs Remittent; <sup>e</sup> Persistent vs Incident, <sup>f</sup> Persistent vs Remittent and <sup>g</sup> Incident vs Remittent).

<sup>h, i, j, k, l, m</sup> P-values from Student's t-test. Comparisons between ages in the four groups. (<sup>h</sup> TDC vs Persistent; <sup>i</sup> TDC vs Incident; <sup>j</sup> TDC vs Remittent; <sup>k</sup> Persistent vs Incident; <sup>l</sup> Persistent vs Remittent and <sup>m</sup> Incident vs Remittent).

<sup>n, o, p, q, r, s</sup> P-values from Chi-squared test. Comparisons between ethnicity in the four groups. (<sup>n</sup> TDC vs Persistent; <sup>o</sup> TDC vs Incident; <sup>p</sup> TDC vs Remittent; <sup>q</sup> Persistent vs Incident; <sup>r</sup> Persistent vs Remittent and <sup>s</sup> Incident vs Remittent).

Statistical significance: P < 0.05

**Table S6.** Descriptive data about adolescents evaluated in 2008 (n= 234)

**Table S6.** Descriptive data about adolescents evaluated in 2008 (n= 234)

| Variables                                 | Participants of Genome-wide methylation (n = 47) |                    |         | Non-study participants (n = 187) |                    |         |
|-------------------------------------------|--------------------------------------------------|--------------------|---------|----------------------------------|--------------------|---------|
|                                           | Anxiety Individuals (n=22)                       | Non-Anxious (n=25) | P-value | Anxiety Individuals (n=109)      | Non-Anxious (n=78) | P-value |
| <sup>a</sup> Gender (female)              | 12 (54.5%)                                       | 13 (52%)           | .861    | 84 (77.06%)                      | 46 (58.97%)        | .008    |
| <sup>b</sup> Age (mean ± SD) <sup>b</sup> | 13.79 ± 2.5                                      | 12.66 ± 2.18       | .506    | 12.72 ± 4.06                     | 11.98 ± 4.67       | .442    |
| <sup>c</sup> <b>Ethnicity</b>             |                                                  |                    |         |                                  |                    |         |
| Caucasians                                | 13 (59.1%)                                       | 14 (58.3%)         | .481    | 69 (63.30%)                      | 54 (69.23%)        | .310    |
| Brazilian Africans                        | 04 (18.2%)                                       | 02 (8.3%)          |         | 16 (14.68%)                      | 08 (10.26%)        |         |
| Others                                    | 05 22.7%)                                        | 07 (29.2%)         |         | 18 (16.51%)                      | 08 (10.26%)        |         |

<sup>a</sup> Chi-squared. Differences between anxiety individuals and non-anxious considering gender.

<sup>b</sup> Test t student. Differences between anxiety individual and non-anxious considering age.

<sup>c</sup> Chi-squared. Differences between anxiety individuals and non-anxious considering ethnicity. Statistical significance: P< 0.05.
